# Supplementary material for: Electrophotocatalytic tri- or difluoromethylative cyclization of alkenes
Source: Royal Society of Chemistry journal article supplement (doi:10.1039/d3qo00290j), 2023-01-01

# **Electrophotocatalytic tri- or difluoromethylative cyclization of alkenes**

Danna Chen, Xuege Yang,<sup>‡</sup> Dongyin Wang,<sup>‡</sup> Yanni Li, Lou Shi\* and Deqiang Liang\*

Yunnan Key Laboratory of Metal-Organic Molecular Materials and Device, School of Chemistry and Chemical Engineering, Kunming University, Kunming 650214, China.

<sup>‡</sup>These authors contributed equally to this work.

E-mail: shil090@nenu.edu.cn, liangdq695@nenu.edu.cn

# Table of Contents

|                                                                                             |            |
|---------------------------------------------------------------------------------------------|------------|
| <b>I. General considerations.....</b>                                                       | <b>S3</b>  |
| <b>II. Optimization of reaction conditions.....</b>                                         | <b>S4</b>  |
| Table S1 Electrolyte screening.....                                                         | S4         |
| Table S2 PC screening.....                                                                  | S4         |
| Table S3 Electrode screening.....                                                           | S5         |
| Table S4 Optimization of the solvent and proton source.....                                 | S6         |
| Table S5 Current and time optimization.....                                                 | S6         |
| Table S6 LED screening.....                                                                 | S7         |
| Table S7 Optimization of the loadings of <b>2a</b> , eosin Y and the electrolyte.....       | S7         |
| Table S8 Other control experiments.....                                                     | S8         |
| <b>III. Unsuccessful substrates.....</b>                                                    | <b>S9</b>  |
| <b>IV. Experimental procedures.....</b>                                                     | <b>S9</b>  |
| 1. General procedure for the photoelectrochemical synthesis ( <b>3a</b> as an example)..... | S9         |
| 2. Gram-scale synthesis.....                                                                | S10        |
| 3. Sunlight experiment.....                                                                 | S10        |
| <b>V. Mechanistic investigations.....</b>                                                   | <b>S12</b> |
| 1. Quenching experiments.....                                                               | S12        |
| 2. Reaction profiles.....                                                                   | S12        |
| 3. On-off experiments.....                                                                  | S14        |
| 4. Cyclic voltammetry studies.....                                                          | S15        |
| 5. Fluorescence spectra.....                                                                | S21        |
| 6. UV-Vis spectroscopic measurements.....                                                   | S22        |
| 7. Determination of the excited-state reduction potential of eosin Y in MeCN.....           | S23        |
| 8. Hydrogen detection tests.....                                                            | S23        |
| <b>VI. Spectral data of products and new compounds.....</b>                                 | <b>S25</b> |
| <b>VII. Copies of NMR spectra for products and new compounds.....</b>                       | <b>S56</b> |

## I. General considerations

Unless otherwise stated, commercially available chemicals were used without treatment. Solvents were degassed by bubbling Ar for 10 minutes before use. Reactions were monitored by Thin Layer Chromatography (TLC) using silica gel F254 plates. Products were purified by column chromatography over 300-400 mesh silica gel under a positive pressure of air.  $^1\text{H}$  NMR,  $^{19}\text{F}$  NMR,  $^{13}\text{C}$  NMR and DEPT NMR spectra were recorded at 25 °C on a Bruker Ascend™ 400 spectrometer using tetramethyl silane (TMS) as internal standard. High-resolution mass spectra (HRMS) were obtained using a Bruker microTOF II Focus spectrometer (ESI). Cyclic voltammetry studies were carried out on a CHI600E electrochemical workstation (Shanghai CH Instruments Co., China). UV-Vis measurements were carried out on a UV-2450 UV-Visible spectrophotometer (Shimadzu, Japan). The emission spectra were recorded on a Cary Eclipse Fluorescence Spectrophotometer (Agilent Technologies). The photoelectrochemical setup used in this research is shown in [Figure S1](#). Photoreactors were bought from GeAo Chem (containing 24 small LEDs, 1 W for every LED, and every reaction tube is irradiated by 6 LEDs), and electrolysis was performed using a DJS-292B dual display potentiostat (Shanghai Xinrui Instruments Co., China). Allylated (**1a**, **1c-1l**, **4a**, **8a-8c**, **12a** and **16**) or homoallylated substrates (**10**)<sup>[1]</sup> and methacryloylated substrates (**1b**, **1m**, **4b-4e**, **6**, **8d-8f**, **12b** and **14**)<sup>[2]</sup> were prepared according to literature procedures.

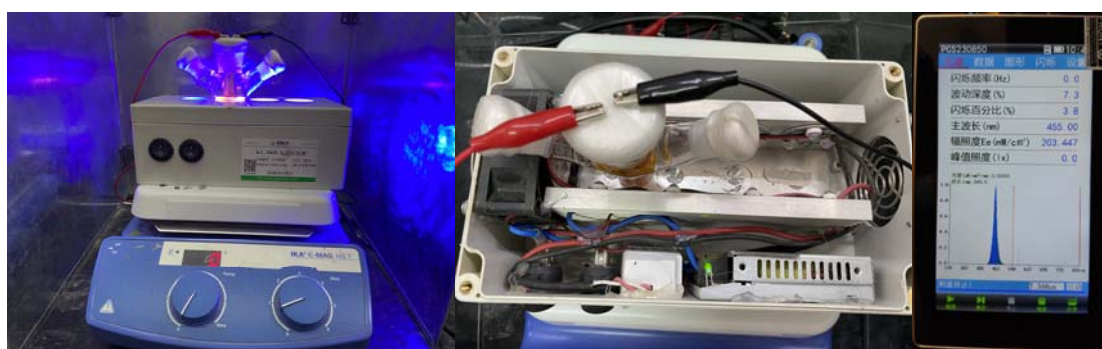

[1] G. Kundu, T. Sperger, K. Rissanen and F. Schoenebeck, *Angew. Chem. Int. Ed.* 2020, **59**, 21930–21934.

[2] Y. Yuan, Y. Zheng, B. Xu, J. Liao, F. Bu, S. Wang, J.-G. Hu and A. Lei, *ACS Catal.*, 2020, **10**, 6676–6681.

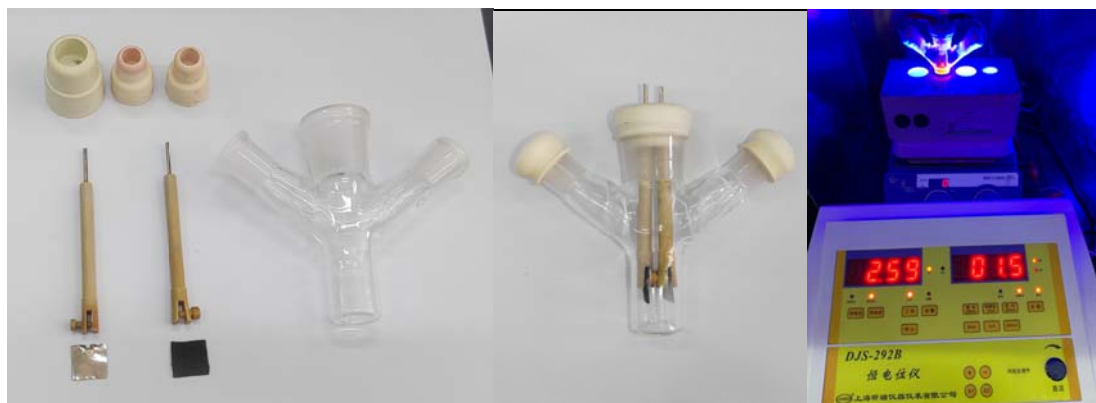

**Figure S1** Photoelectrochemical setup

## II. Optimization of reaction conditions

**Table S1** Electrolyte screening<sup>a</sup>

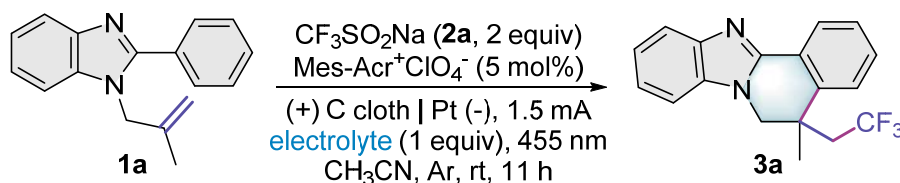

| entry | supporting electrolyte            | yield (%) <sup>b</sup> |
|-------|-----------------------------------|------------------------|
| 1     | Bu <sub>4</sub> NBF <sub>4</sub>  | 29                     |
| 2     | Et <sub>4</sub> NBF <sub>4</sub>  | 14                     |
| 3     | Bu <sub>4</sub> NPF <sub>6</sub>  | 33                     |
| 4     | Bu <sub>4</sub> NOAc              | 26                     |
| 5     | Bu <sub>4</sub> NClO <sub>4</sub> | 34                     |
| 6     | LiClO <sub>4</sub>                | 37                     |
| 7     | <b>KPF<sub>6</sub></b>            | <b>43</b>              |
| 8     | TBAI                              | 2                      |

<sup>a</sup>Reaction conditions: **1a** (0.3 mmol), **2a** (0.6 mmol), Mes-Acr<sup>+</sup>ClO<sub>4</sub><sup>-</sup> (0.015 mmol), electrolyte (0.3 mmol), MeCN (9.0 mL), 6 W blue LEDs (455 nm), carbon cloth anode (15 mm × 15 mm × 0.33 mm, WOS1009, Taiwan CeTech), platinum plate cathode (15 mm × 15 mm × 0.3 mm), undivided cell, constant current = 1.5 mA, Ar, room temperature, 11 h.

<sup>b</sup>Yields were determined by <sup>19</sup>F NMR analysis using trifluorotoluene as an internal standard.

**Table S2** PC screening<sup>a</sup>

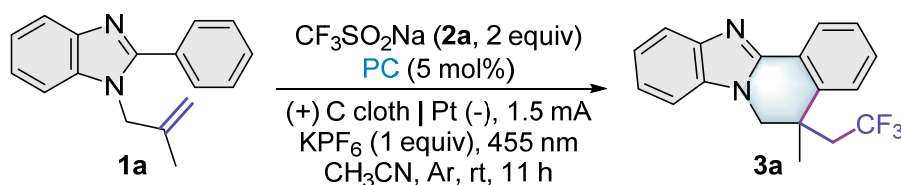

| entry    | PC                                                                | yield (%) <sup>b</sup> |
|----------|-------------------------------------------------------------------|------------------------|
| 1        | 4CzIPN                                                            | 54                     |
| 2        | Ir(ppy) <sub>3</sub>                                              | 48                     |
| 3        | [Ir(dtbbpy)(ppy) <sub>2</sub> ]PF <sub>6</sub>                    | 49                     |
| 4        | (Ir[dF(CF <sub>3</sub> )ppy] <sub>2</sub> (dtbpy))PF <sub>6</sub> | 59                     |
| 5        | Ru(bpy) <sub>3</sub> Cl <sub>2</sub>                              | 22                     |
| <b>6</b> | <b>eosin Y</b>                                                    | <b>74</b>              |
| 7        | eosin Y disodium                                                  | 70                     |
| 8        | eosin B                                                           | 66                     |
| 9        | rose bengal                                                       | 10                     |
| 10       | rhodamine B                                                       | 34                     |
| 11       | fluorescein                                                       | 64                     |
| 12       | methylene blue                                                    | 20                     |
| 13       | thioxanthone                                                      | 34                     |
| 14       | –                                                                 | 27                     |

<sup>a</sup>Reaction conditions: **1a** (0.3 mmol), **2a** (0.6 mmol), PC (0.015 mmol), KPF<sub>6</sub> (0.3 mmol), MeCN (9.0 mL), 6 W blue LEDs (455 nm), carbon cloth anode (15 mm × 15 mm × 0.33 mm, WOS1009, Taiwan CeTech), platinum plate cathode (15 mm × 15 mm × 0.3 mm), undivided cell, constant current = 1.5 mA, Ar, room temperature, 11 h. <sup>b</sup>Yields were determined by <sup>19</sup>F NMR analysis using trifluorotoluene as an internal standard.

**Table S3** Electrode screening<sup>a</sup>

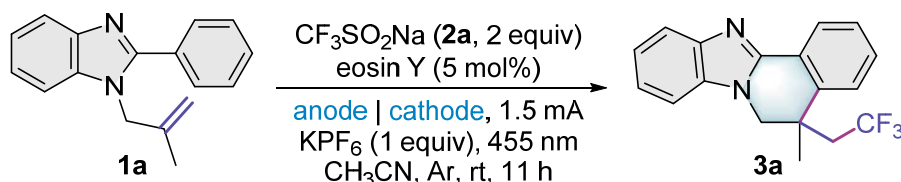

| entry | anode    | cathode         | yield (%) <sup>b</sup> |
|-------|----------|-----------------|------------------------|
| 1     | C felt   | Pt plate        | 62                     |
| 2     | C rod    | Pt plate        | 34                     |
| 3     | RVC      | Pt plate        | 6                      |
| 4     | Pt plate | Pt plate        | 36                     |
| 5     | C cloth  | Ni plate        | 62                     |
| 6     | C cloth  | Ni foam         | 3                      |
| 7     | C cloth  | stainless steel | 68                     |
| 8     | C cloth  | C cloth         | 62                     |
| 9     | C cloth  | C felt          | 3                      |
| 10    | C cloth  | C rod           | 57                     |

<sup>a</sup>Reaction conditions: **1a** (0.3 mmol), **2a** (0.6 mmol), Mes-Acr<sup>+</sup>ClO<sub>4</sub><sup>-</sup> (0.015 mmol), electrolyte (0.3 mmol), MeCN (9.0 mL), 6 W blue LEDs (455 nm), anode (15 mm × 15 mm), cathode (15 mm × 15 mm), undivided cell, constant current = 1.5 mA, Ar, room temperature, 11 h. <sup>b</sup>Yields were determined by <sup>19</sup>F NMR analysis using trifluorotoluene as an internal

standard.

**Table S4** Optimization of the solvent and proton source<sup>a</sup>

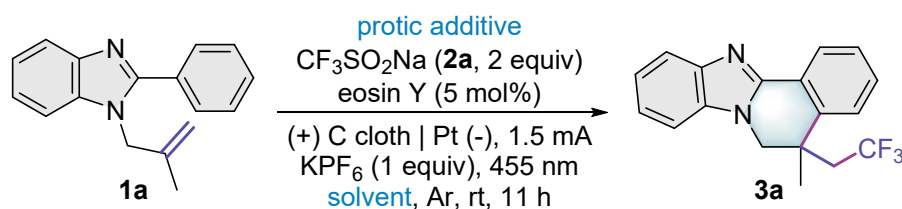

| entry | solvent                                          | protic additive (equiv) | yield (%) <sup>b</sup> |
|-------|--------------------------------------------------|-------------------------|------------------------|
| 1     | DCE                                              | –                       | 48                     |
| 2     | CH <sub>3</sub> NO <sub>2</sub>                  | –                       | 19                     |
| 3     | acetone                                          | –                       | 68                     |
| 4     | THF                                              | –                       | 5                      |
| 5     | DMA                                              | –                       | 16                     |
| 6     | DMSO                                             | –                       | 69                     |
| 7     | MeOH                                             | –                       | 24                     |
| 8     | HFIP                                             | –                       | 7                      |
| 9     | CH <sub>3</sub> CN/H <sub>2</sub> O (9 : 1, v/v) | –                       | 50                     |
| 10    | CH <sub>3</sub> CN                               | H <sub>2</sub> O (2)    | 67                     |
| 11    | CH <sub>3</sub> CN                               | MeOH (2)                | 58                     |
| 12    | CH <sub>3</sub> CN                               | HFIP (2)                | 36                     |
| 13    | CH <sub>3</sub> CN                               | TFA (2)                 | 26                     |

<sup>a</sup>Reaction conditions: **1a** (0.3 mmol), **2a** (0.6 mmol), eosin Y (0.015 mmol), KPF<sub>6</sub> (0.3 mmol), solvent (9.0 mL), 6 W blue LEDs (455 nm), carbon cloth anode (15 mm × 15 mm × 0.33 mm, WOS1009, Taiwan CeTech), platinum plate cathode (15 mm × 15 mm × 0.3 mm), undivided cell, constant current = 1.5 mA, Ar, room temperature, 11 h. <sup>b</sup>Yields were determined by <sup>19</sup>F NMR analysis using trifluorotoluene as an internal standard.

**Table S5** Current and time optimization<sup>a</sup>

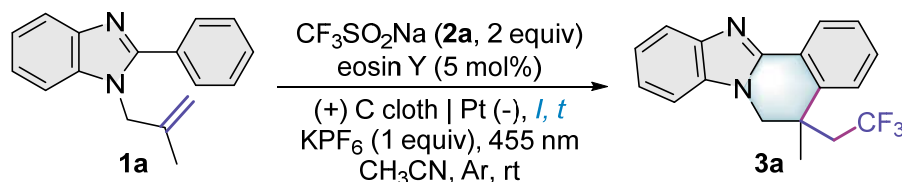

| entry | <i>I</i> (mA), <i>t</i> (h) | yield (%) <sup>b</sup> |
|-------|-----------------------------|------------------------|
| 1     | 1, 16.5                     | 68                     |
| 2     | 2, 8.25                     | 70                     |
| 3     | 3, 5.5                      | 64                     |
| 4     | 4, 4.125                    | 62                     |
| 5     | 5, 3.3                      | 47                     |
| 6     | 1.5, 10.73                  | 72                     |

<sup>a</sup>Reaction conditions: **1a** (0.3 mmol), **2a** (0.6 mmol), eosin Y (0.015 mmol), KPF<sub>6</sub> (0.3 mmol), MeCN (9.0 mL), 6 W blue LEDs (455 nm), carbon cloth anode (15 mm × 15 mm × 0.33 mm, WOS1009, Taiwan CeTech), platinum plate cathode (15 mm × 15 mm × 0.3 mm), undivided cell, constant current, Ar, room temperature. <sup>b</sup>Yields were determined by <sup>19</sup>F NMR analysis using trifluorotoluene as an internal standard.

**Table S6** LED screening<sup>a</sup>

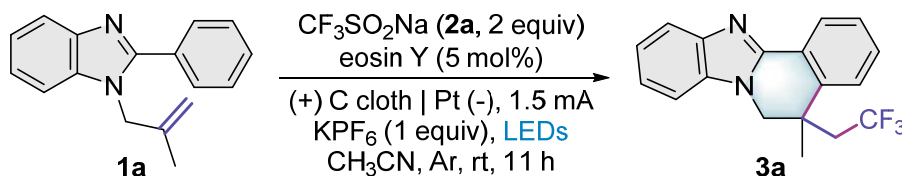

| entry | LEDs            | yield (%) <sup>b</sup> |
|-------|-----------------|------------------------|
| 1     | violet (395 nm) | 59                     |
| 2     | white           | 72                     |
| 3     | green (525 nm)  | 55                     |
| 4     | yellow (585 nm) | 32                     |

<sup>a</sup>Reaction conditions: **1a** (0.3 mmol), **2a** (0.6 mmol), eosin Y (0.015 mmol), KPF<sub>6</sub> (0.3 mmol), MeCN (9.0 mL), 6 W LEDs, carbon cloth anode (15 mm × 15 mm × 0.33 mm, WOS1009, Taiwan CeTech), platinum plate cathode (15 mm × 15 mm × 0.3 mm), undivided cell, constant current = 1.5 mA, Ar, room temperature, 11 h. <sup>b</sup>Yields were determined by <sup>19</sup>F NMR analysis using trifluorotoluene as an internal standard.

**Table S7** Optimization of the loadings of **2a**, eosin Y and the electrolyte<sup>a</sup>

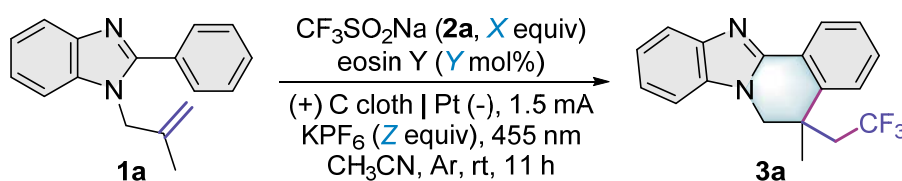

| entry    | X          | Y        | Z        | yield (%) <sup>b</sup> |
|----------|------------|----------|----------|------------------------|
| 1        | 1.1        | 5        | 1        | 38                     |
| 2        | 1.5        | 5        | 1        | 56                     |
| <b>3</b> | <b>2.5</b> | <b>5</b> | <b>1</b> | <b>83</b>              |
| 4        | 3          | 5        | 1        | 80                     |
| 5        | 2.5        | 1        | 1        | 62                     |
| 6        | 2.5        | 2.5      | 1        | 73                     |
| 7        | 2.5        | 7.5      | 1        | 82                     |
| 8        | 2.5        | 10       | 1        | 80                     |
| 9        | 2.5        | 5        | 0        | 67                     |
| 10       | 2.5        | 5        | 0.3      | 71                     |

|    |     |   |     |    |
|----|-----|---|-----|----|
| 11 | 2.5 | 5 | 0.5 | 79 |
| 12 | 2.5 | 5 | 1.5 | 83 |
| 13 | 2.5 | 5 | 2   | 77 |

<sup>a</sup>Reaction conditions: **1a** (0.3 mmol), **2a**, eosin Y, KPF<sub>6</sub>, MeCN (9.0 mL), 6 W blue LEDs (455 nm), carbon cloth anode (15 mm × 15 mm × 0.33 mm, WOS1009, Taiwan CeTech), platinum plate cathode (15 mm × 15 mm × 0.3 mm), undivided cell, constant current = 1.5 mA, Ar, room temperature, 11 h. <sup>b</sup>Yields were determined by <sup>19</sup>F NMR analysis using trifluorotoluene as an internal standard.

**Table S8** Other control experiments<sup>a</sup>

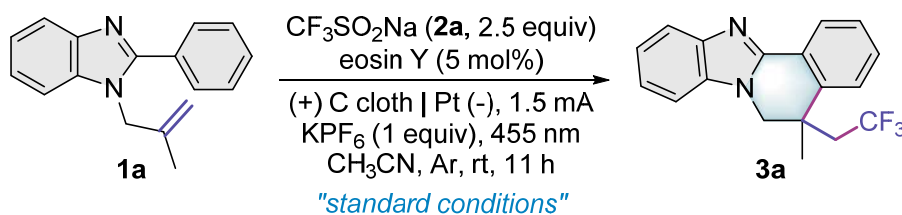

| entry | variation from the standard conditions | yield (%) <sup>b</sup> |
|-------|----------------------------------------|------------------------|
| 1     | no electric current                    | 6                      |
| 2     | no light                               | 38                     |
| 3     | no PC and in the dark                  | 33                     |
| 4     | under an air atmosphere                | 76                     |
| 5     | no electricity and under air           | 20                     |

<sup>a</sup>Reaction conditions: **1a** (0.3 mmol), **2a** (0.75 mmol), eosin Y (0.015 mmol), KPF<sub>6</sub> (0.3 mmol), MeCN (9.0 mL), 6 W blue LEDs (455 nm), carbon cloth anode (15 mm × 15 mm × 0.33 mm, WOS1009, Taiwan CeTech), platinum plate cathode (15 mm × 15 mm × 0.3 mm), undivided cell, constant current = 1.5 mA, Ar, room temperature, 11 h. <sup>b</sup>Yields were determined by <sup>19</sup>F NMR analysis using trifluorotoluene as an internal standard.



### III. Unsuccessful substrates

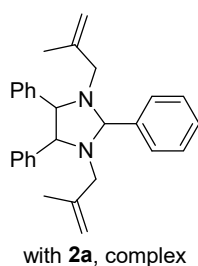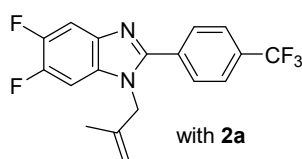

The product was isolated in 83% yield (104.5 mg, yellowish solid, mp. 126-127 °C), yet we failed to obtain its NMR spectra due to its poor solubility in various solvents.

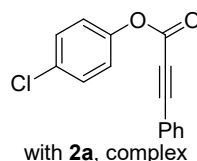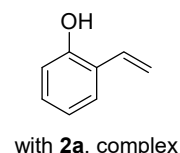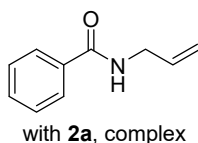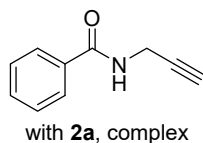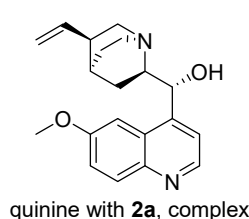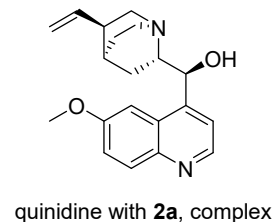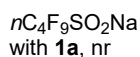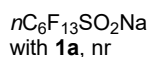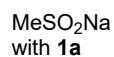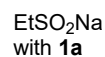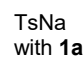

substrate **1a** recovered  
trace amounts of an unidentified product

### IV. Experimental procedures

#### 1. General procedure for the photoelectrochemical synthesis (**3a** as an example)

A custom-made undivided cell, equipped with a magnetic stirring bar, a C cloth anode (15 mm × 15 mm × 0.33 mm) and a platinum plate cathode (15 mm × 15 mm × 0.3 mm, carefully polished until shining), was charged sequentially with *N*-allylated 2-arylbenzimidazole **1a** (0.3 mmol, 74.5 mg),  $\text{CF}_3\text{SO}_2\text{Na}$  **2a** (2.5 equiv, 0.75 mmol, 117.1 mg), eosin Y (5 mol%, 0.015 mmol, 9.7 mg) and electrolyte  $\text{KPF}_6$  (1 equiv, 0.3 mmol, 55.2 mg) under argon, followed by the addition of MeCN (9.0 mL). The mixture was electrolyzed with stirring using a constant current of 1.5 mA under blue LED irradiation at room temperature for 11 h (2.05 F/mol). The residue obtained after evaporation of the solvent was purified by column chromatography on silica gel (petroleum ether–ethyl acetate = 20:1) to afford 5-methyl-5-(2,2,2-trifluoroethyl)-5,6-dihydrobenzo[4,5]imidazo[2,1-*a*]isoquinoline **3a** as a colorless oil (79.1 mg, 83% yield).

## 2. Gram-scale synthesis

A 100-mL two-necked flask, equipped with a magnetic stirring bar, a C cloth anode (15 mm × 15 mm × 0.33 mm) and a platinum plate cathode (15 mm × 15 mm × 0.3 mm, carefully polished until shining), was charged sequentially with *N*-allylated 2-arylbenzimidazole **1a** (5 mmol, 1241.7 mg), CF<sub>3</sub>SO<sub>2</sub>Na **2a** (2.5 equiv, 12.5 mmol, 1950.7 mg), eosin Y (5 mol%, 0.25 mmol, 162.0 mg) and electrolyte KPF<sub>6</sub> (1 equiv, 5 mmol, 920.3 mg) under argon, followed by the addition of MeCN (150.0 mL). The mixture was electrolyzed with stirring using a constant current of 20.0 mA under blue LED irradiation (25 W × 2, 455 nm, Figure S2) at room temperature for 14 h. The residue obtained after evaporation of the solvent was purified by column chromatography on silica gel (petroleum ether–ethyl acetate = 15:1) to afford 5-methyl-5-(2,2,2-trifluoroethyl)-5,6-dihydrobenzo[4,5]imidazo[2,1-*a*]isoquinoline **3a** as a colorless oil (1214.9 mg, 77% yield).

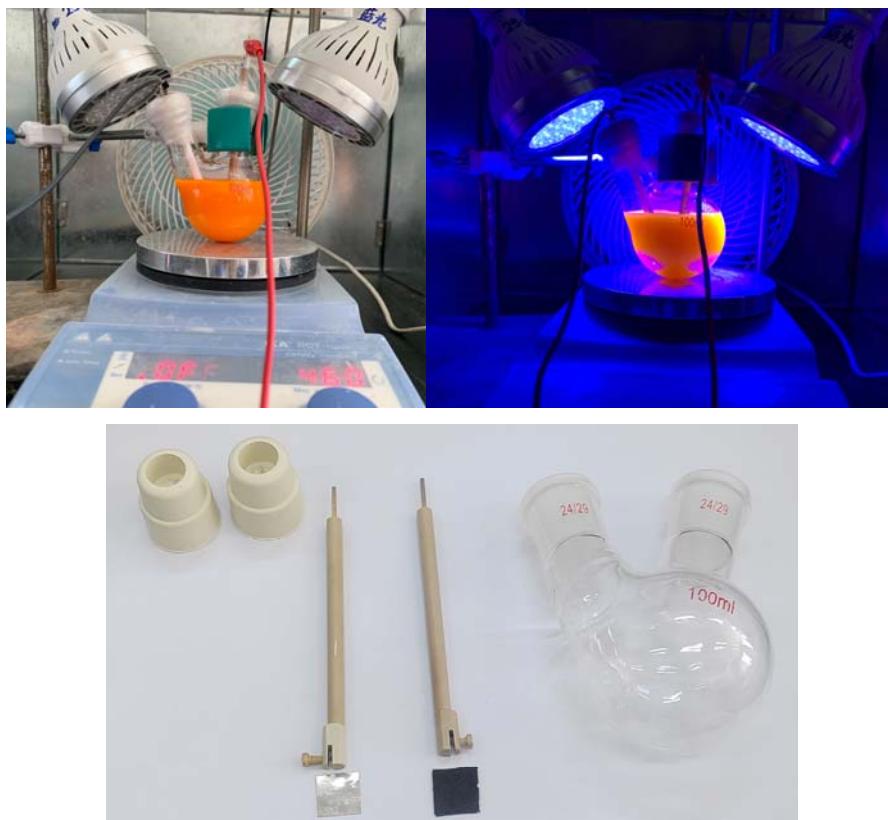

Figure S2 Setup for gram-scale synthesis

## 3. Sunlight experiment

A custom-made undivided cell, equipped with a magnetic stirring bar, a C cloth anode (15 mm × 15 mm × 0.33 mm) and a platinum plate cathode (15 mm × 15 mm × 0.3 mm, carefully polished until shining), was charged sequentially with *N*-allylated 2-arylbenzimidazole **1a**

(0.3 mmol, 74.5 mg),  $\text{CF}_3\text{SO}_2\text{Na}$  **2a** (2.5 equiv, 0.75 mmol, 117.1 mg), eosin Y (5 mol%, 0.015 mmol, 9.7 mg) and electrolyte  $\text{KPF}_6$  (1 equiv, 0.3 mmol, 55.2 mg) under argon, followed by the addition of MeCN (9.0 mL). The mixture was electrolyzed with stirring using a constant current of 1.5 mA under sunlight irradiation (2021-09-11 (5.5 h, 11:56-17:26) and 2021-09-12 (5.5 h, 11:50-17:20), Kunming, [Figure S3](#)) at room temperature for 11 h. The residue obtained after evaporation of the solvent was purified by column chromatography on silica gel (petroleum ether–ethyl acetate = 20:1) to afford 5-methyl-5-(2,2,2-trifluoroethyl)-5,6-dihydrobenzo[4,5]imidazo[2,1-*a*]isoquinoline **3a** as a colorless oil (81.4 mg, 86% yield).

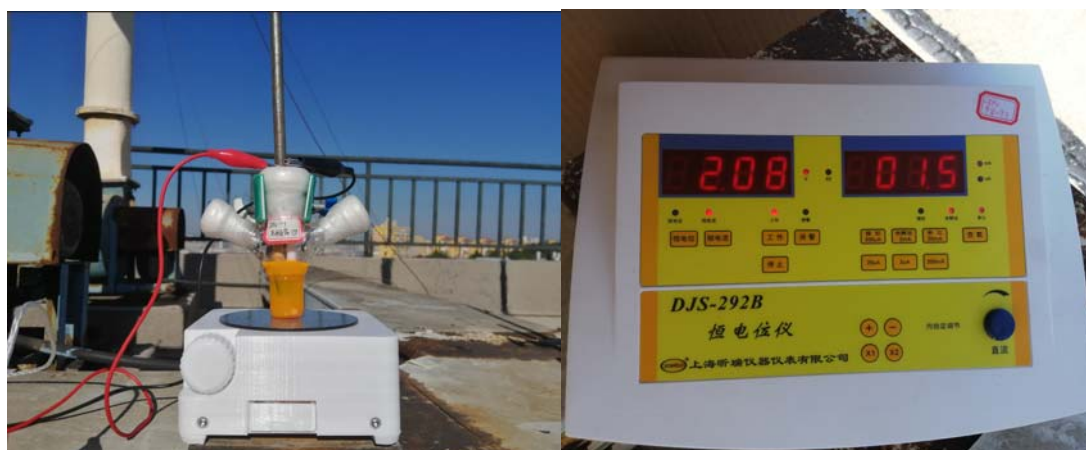

|                   |      |      |   |           |
|-------------------|------|------|---|-----------|
| 2021-09-11<br>星期六 | 26°C | 17°C | 晴 | 南风<br>2级  |
| 2021-09-12<br>星期日 | 27°C | 16°C | 晴 | 东南风<br>2级 |

**Figure S3** Setup for natural sunlight experiment

## V. Mechanistic investigations

### 1. Quenching experiments

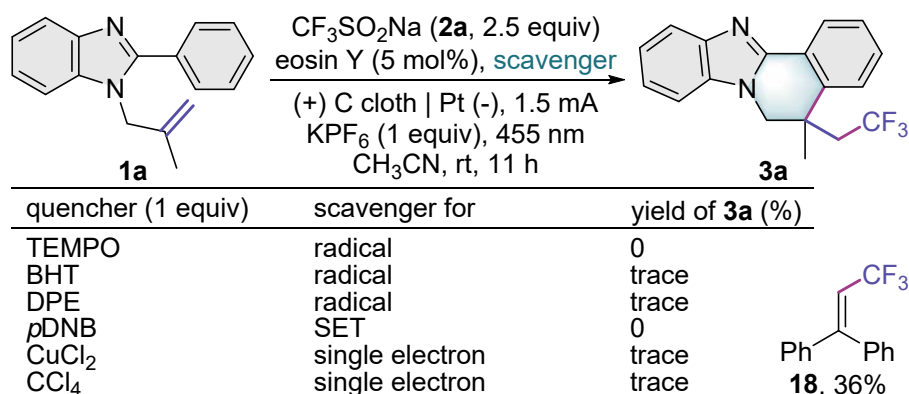

A custom-made undivided cell, equipped with a magnetic stirring bar, a C cloth anode (15 mm × 15 mm × 0.33 mm) and a platinum plate cathode (15 mm × 15 mm × 0.3 mm, carefully polished until shining), was charged sequentially with *N*-allylated 2-arylbenzimidazole **1a** (0.3 mmol, 74.5 mg), CF<sub>3</sub>SO<sub>2</sub>Na **2a** (2.5 equiv, 0.75 mmol, 117.1 mg), eosin Y (5 mol%, 0.015 mmol, 9.7 mg), KPF<sub>6</sub> (1 equiv, 0.3 mmol, 55.2 mg) and a scavenger (1.0 equiv, 0.3 mmol) under argon, followed by the addition of MeCN (9.0 mL). The mixture was electrolyzed with stirring using a constant current of 1.5 mA under blue LED irradiation at room temperature for 11 h. In the case of DPE experiment, the residue obtained after evaporation of the solvent was purified by column chromatography on silica gel using petroleum ether to afford (3,3,3-trifluoroprop-1-ene-1,1-diyl)dibenzene **18** as a colorless oil (26.8 mg, 36% yield).

### 2. Reaction profiles

(Trifluoromethyl)benzene (1 equiv) was added to the reactions of **1a** and **2a** as an internal standard before reaction. 0.05 mL of the crude reaction solution was taken out each time via a syringe and was subjected to <sup>19</sup>F NMR analysis after filtered by a filter membrane with pore size of 0.45 μm.

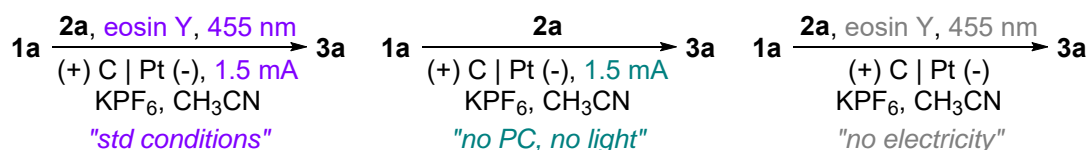

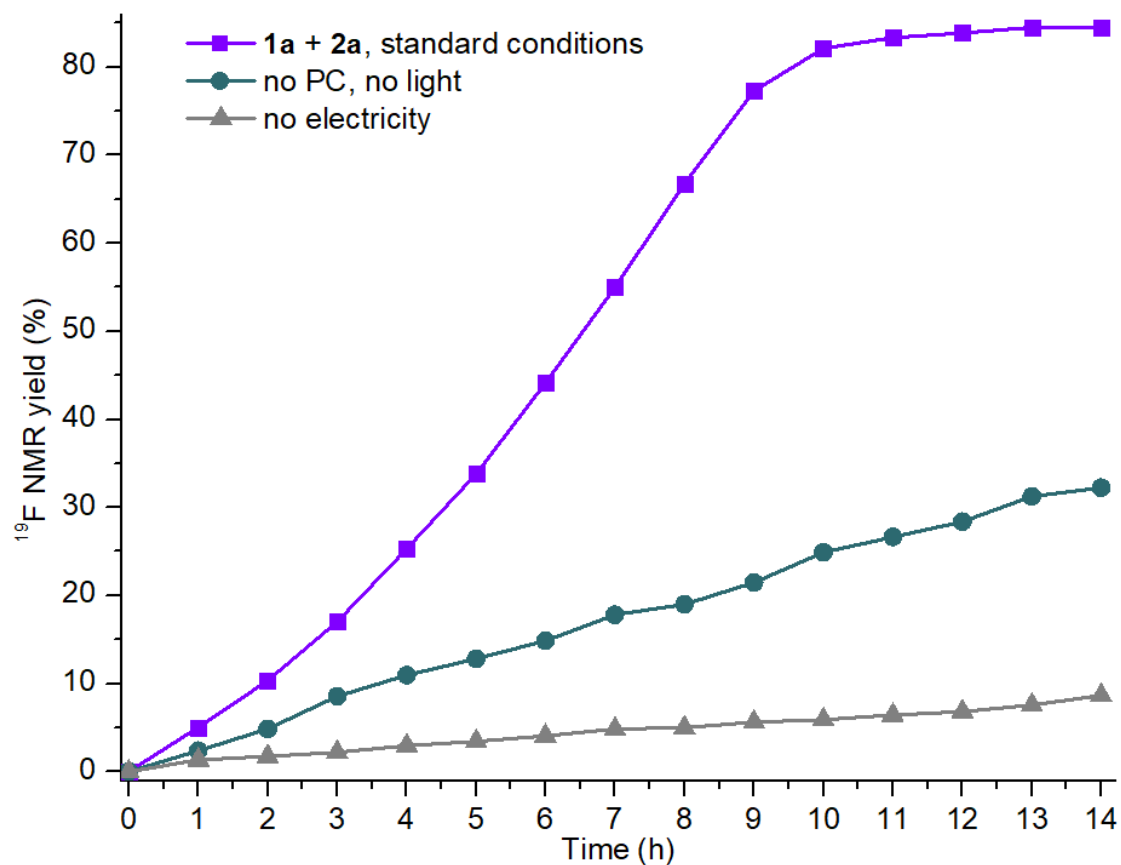

|           | A(X) | D1(Y)                        | C1(Y)           | B(Y)           |
|-----------|------|------------------------------|-----------------|----------------|
| Long Name | Time | 19F NMR yield                | 19F NMR yield   | 19F NMR yield  |
| Units     | h    | %                            | %               | %              |
| Comments  |      | 1a + 2a, standard conditions | no PC, no light | no electricity |
| 1         | 0    | 0.00                         | 0.00            | 0.00           |
| 2         | 1    | 5.04                         | 2.39            | 1.34           |
| 3         | 2    | 10.35                        | 4.85            | 1.76           |
| 4         | 3    | 17.05                        | 8.55            | 2.20           |
| 5         | 4    | 25.32                        | 10.96           | 2.96           |
| 6         | 5    | 33.84                        | 12.83           | 3.44           |
| 7         | 6    | 44.15                        | 14.86           | 4.06           |
| 8         | 7    | 55.00                        | 17.83           | 4.84           |
| 9         | 8    | 66.78                        | 19.01           | 5.01           |
| 10        | 9    | 77.29                        | 21.48           | 5.62           |
| 11        | 10   | 82.15                        | 24.91           | 5.92           |
| 12        | 11   | 83.35                        | 26.65           | 6.44           |
| 13        | 12   | 83.89                        | 28.40           | 6.83           |
| 14        | 13   | 84.51                        | 31.25           | 7.57           |
| 15        | 14   | 84.45                        | 32.24           | 8.65           |

**Figure S4** Reaction kinetic profiles

### 3. On-off experiments

|           | A(X) | B(Y)                      | G1(Y)                     | D1(Y)                     |
|-----------|------|---------------------------|---------------------------|---------------------------|
| Long Name | Time | <sup>19</sup> F NMR yield | <sup>19</sup> F NMR yield | <sup>19</sup> F NMR yield |
| Units     | h    | %                         | %                         | %                         |
| Comments  |      | both on-off               | electricity on-off        | light on-off              |
| 1         | 0    | 0                         | 0                         | 0                         |
| 2         | 1    | 5.07                      | 5.59                      | 4.88                      |
| 3         | 2    | 5.05                      | 7.73                      | 8.8                       |
| 4         | 3    | 12.11                     | 16.03                     | 20.5                      |
| 5         | 4    | 12.26                     | 18.48                     | 24.84                     |
| 6         | 5    | 25.68                     | 27.42                     | 45.28                     |
| 7         | 6    | 25.16                     | 29.88                     | 52.12                     |

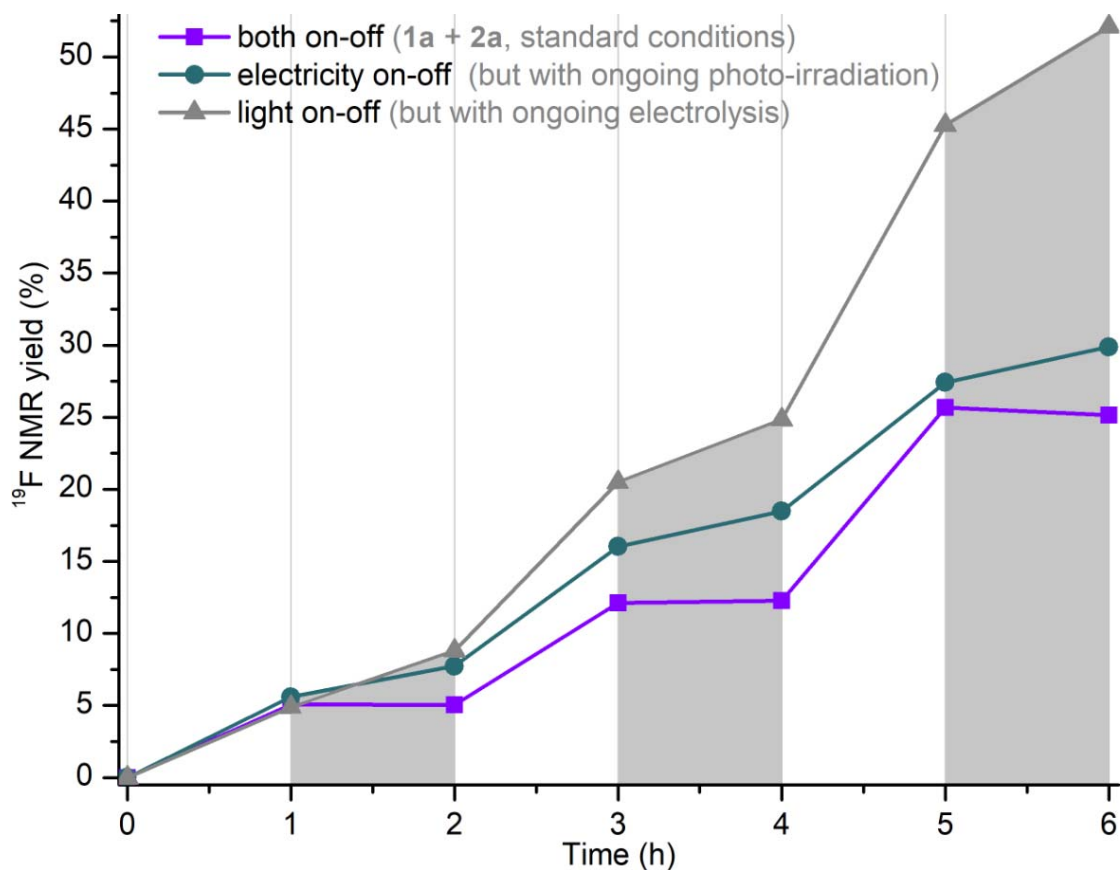

Figure S5 On-off experiments

Benzotrifluoride (1.0 equiv) was added as an internal standard to the reactions of **1a** with **2a** before reaction. 0.05 mL of the crude reaction solution was taken out each time via a syringe and was subjected to <sup>19</sup>F NMR analysis after filtered by a filter membrane with pore size of 0.45 μm.

#### 4. Cyclic voltammetry studies

**General procedure:** Cyclic voltammograms were performed in a three-electrode cell at room temperature. The working electrode was a glassy carbon (GC,  $d = 3$  mm) disk electrode, and the counter electrode was a platinum wire. The reference was an Ag/AgCl electrode submerged in a saturated aqueous KCl solution, and separated from reactions by a salt bridge. 12 mL solution containing 1.2 mmol  $n\text{Bu}_4\text{NBF}_4$  was poured into the electrochemical cell in all experiments. The scan rate was 0.05 V/s.

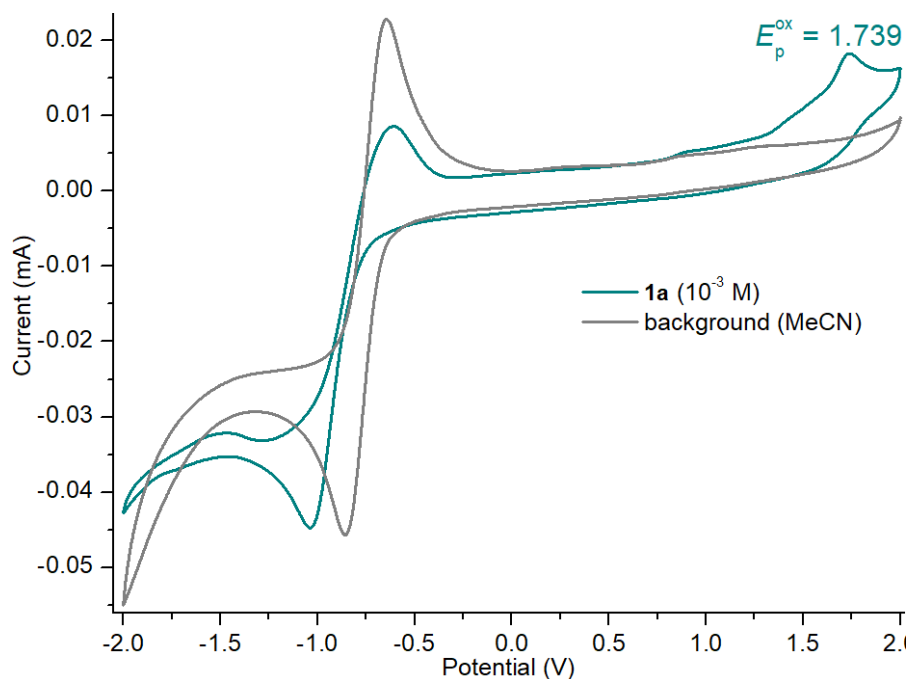

**Figure S6** Cyclic voltammograms of **1a** ( $10^{-3}$  M) in  $\text{CH}_3\text{CN}$

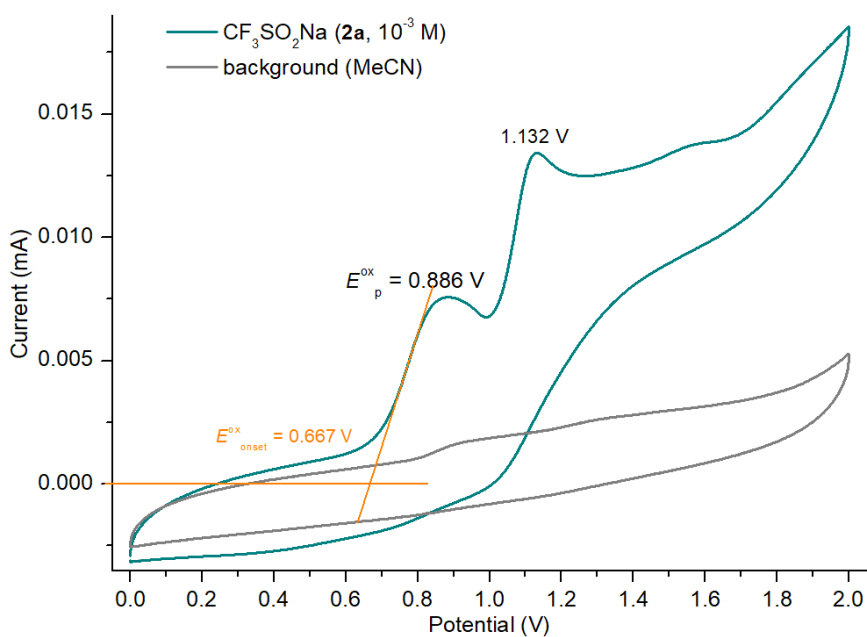

**Figure S7** Anodic cyclic voltammograms of **2a** ( $10^{-3}$  M) in  $\text{CH}_3\text{CN}$

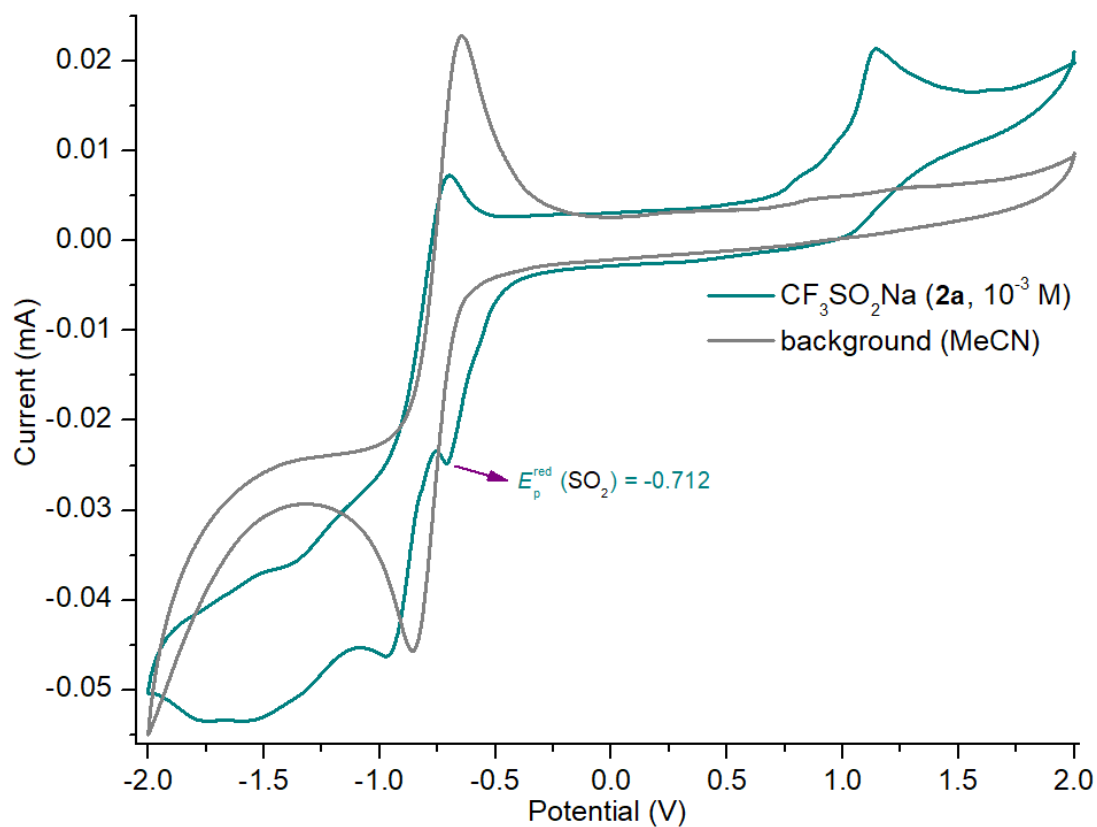

**Figure S8** Cyclic voltammograms of **2a** ( $10^{-3}$  M) in  $\text{CH}_3\text{CN}$  ranging from -2 to 2 V

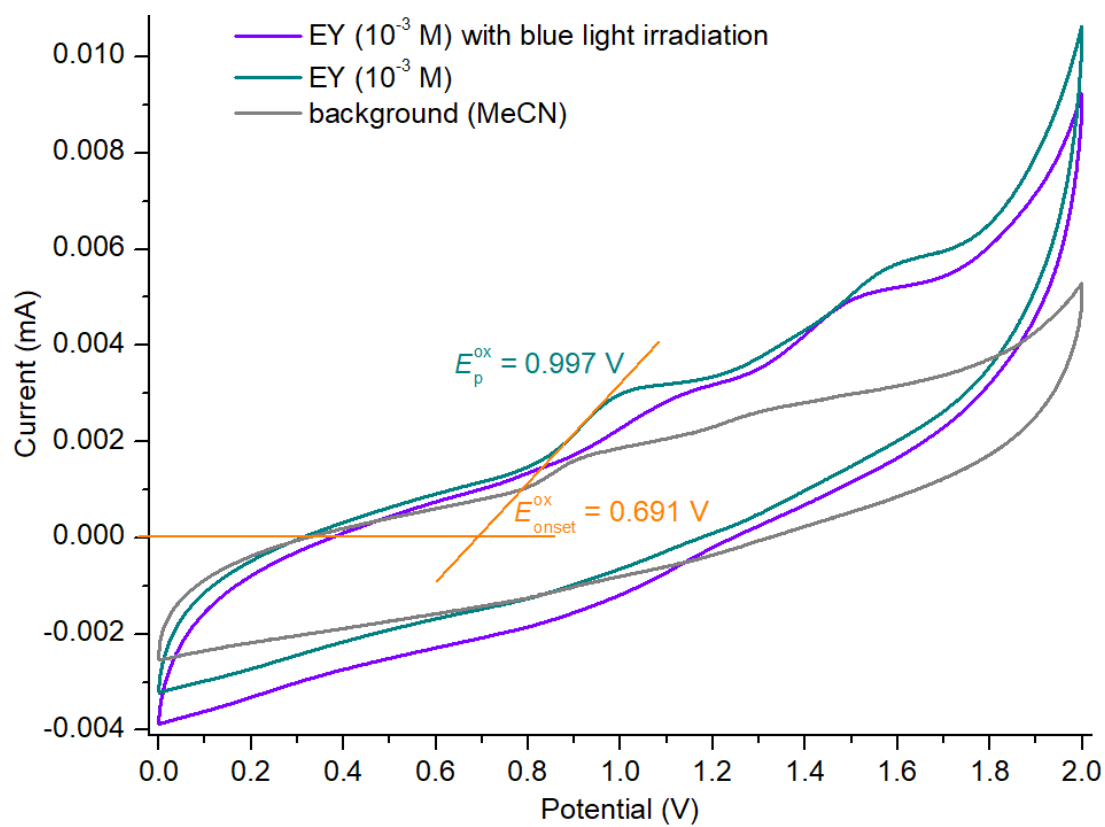

**Figure S9** Anodic cyclic voltammograms of eosin Y ( $10^{-3}$  M) in  $\text{CH}_3\text{CN}$



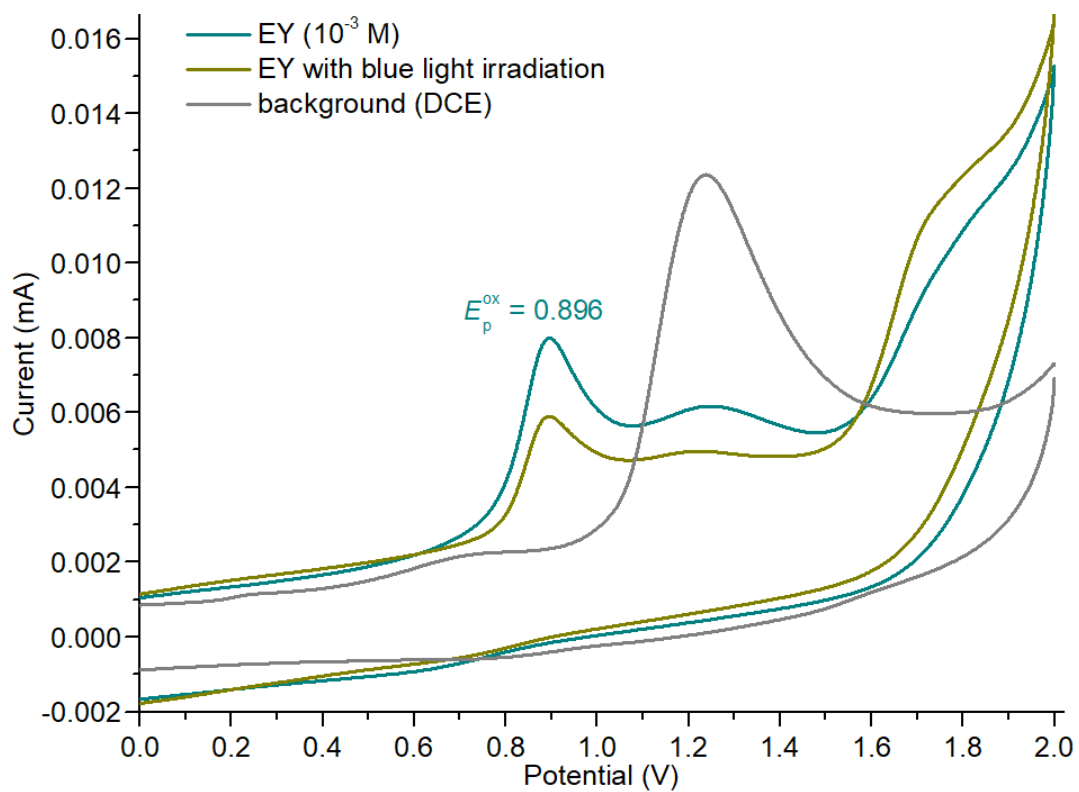

**Figure S10** Anodic cyclic voltammograms of eosin Y ( $10^{-3}$  M) in DCE ranging from -2 to 2 V

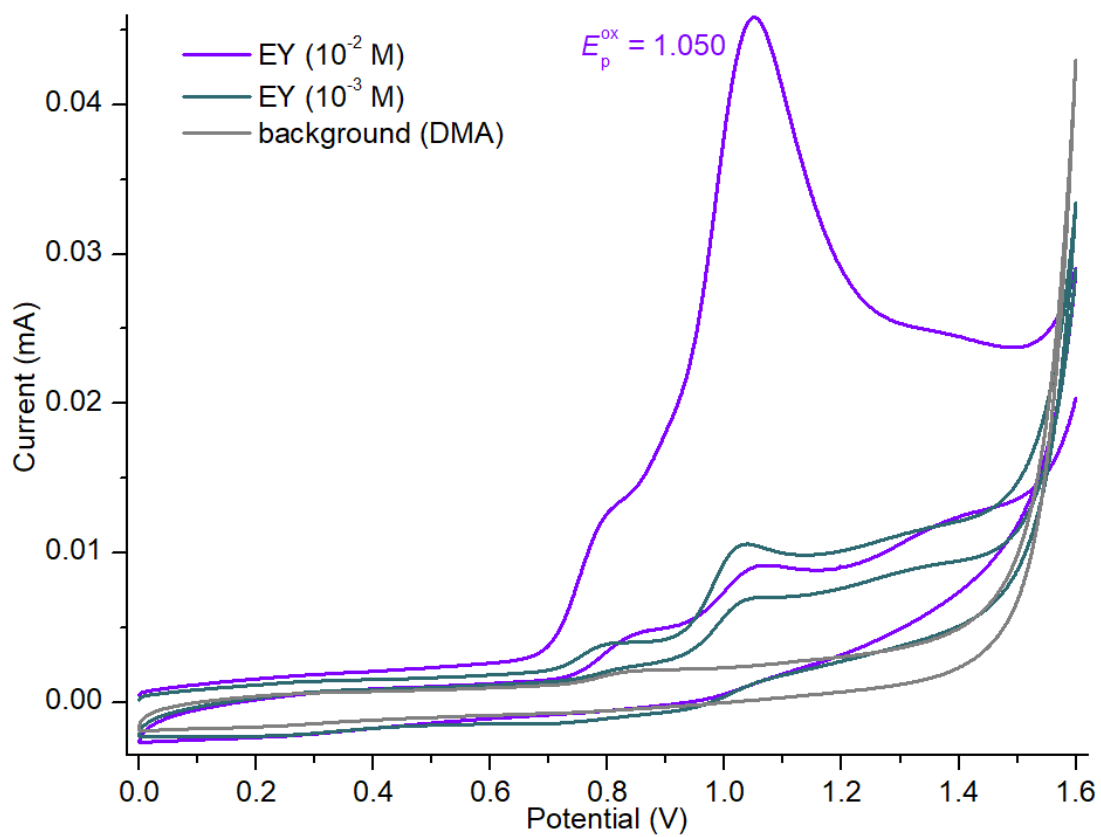

**Figure S11** Anodic cyclic voltammograms of eosin Y in DMA

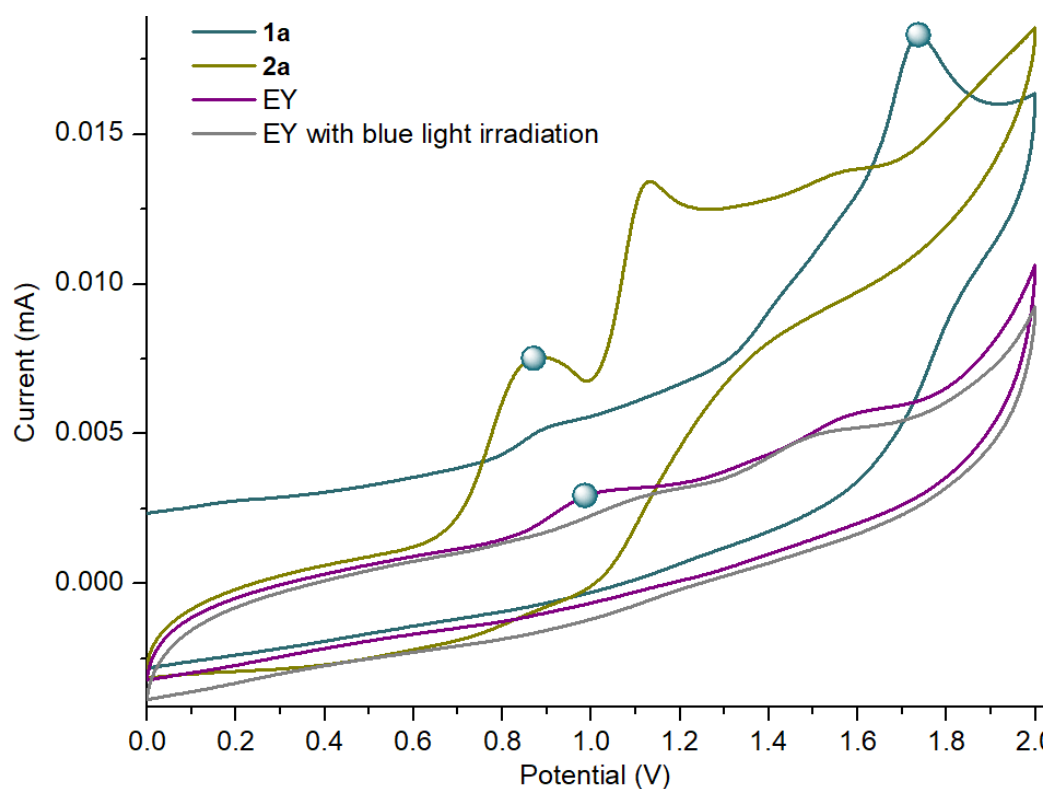

**Figure S12** Anodic cyclic voltammograms of **1a** ( $10^{-3}$  M), **2a** ( $10^{-3}$  M), eosin Y ( $10^{-3}$  M) in  $\text{CH}_3\text{CN}$

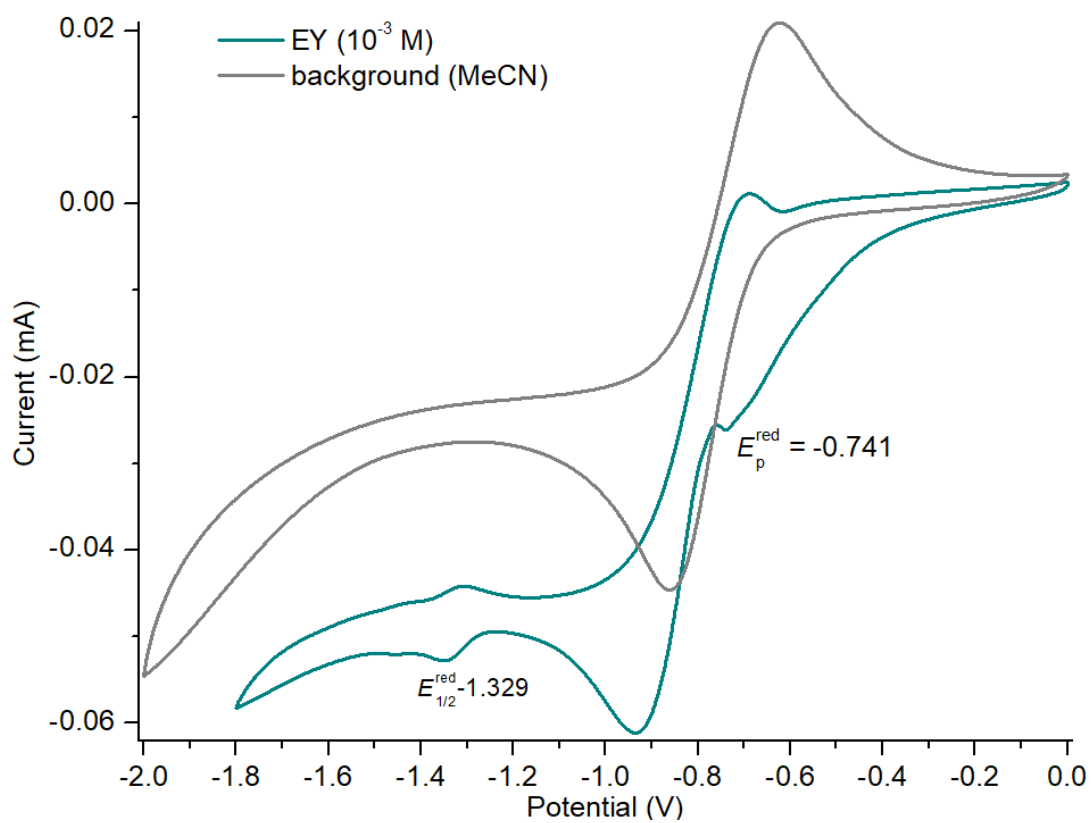

**Figure S13** Cathodic cyclic voltammograms of eosin Y ( $10^{-3}$  M) in  $\text{CH}_3\text{CN}$

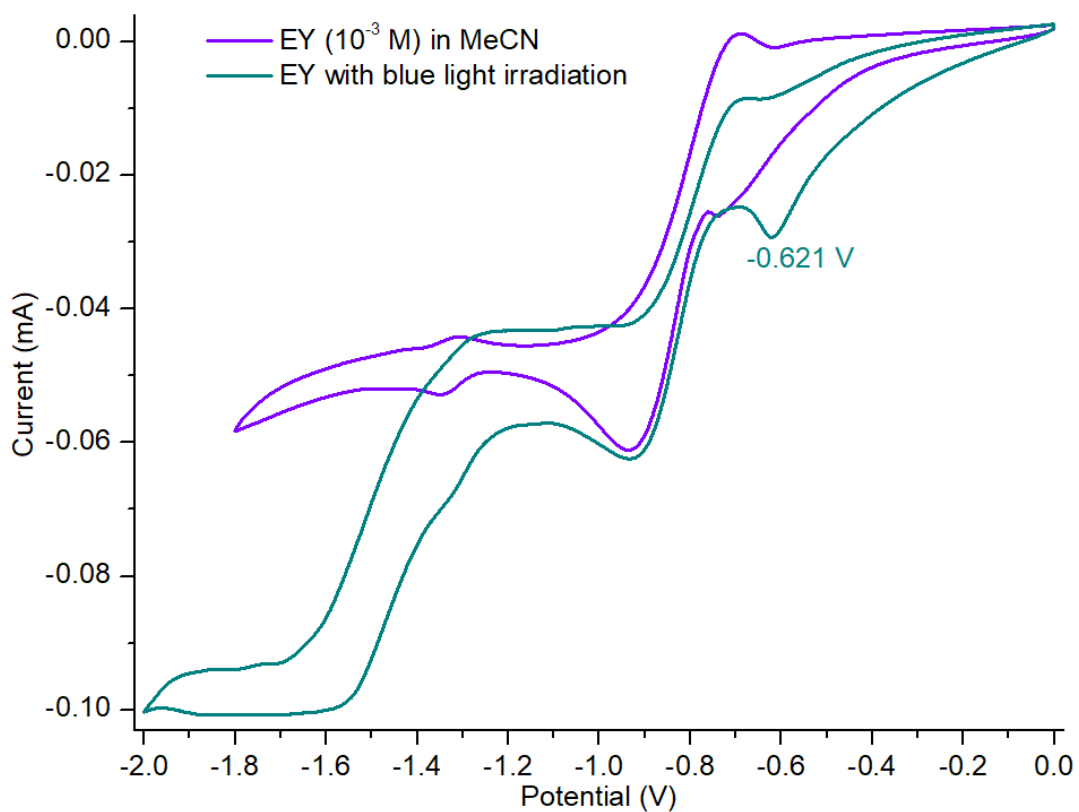

**Figure S14** Cathodic cyclic voltammograms of eosin Y ( $10^{-3}$  M) in  $\text{CH}_3\text{CN}$  with or without blue light irradiation

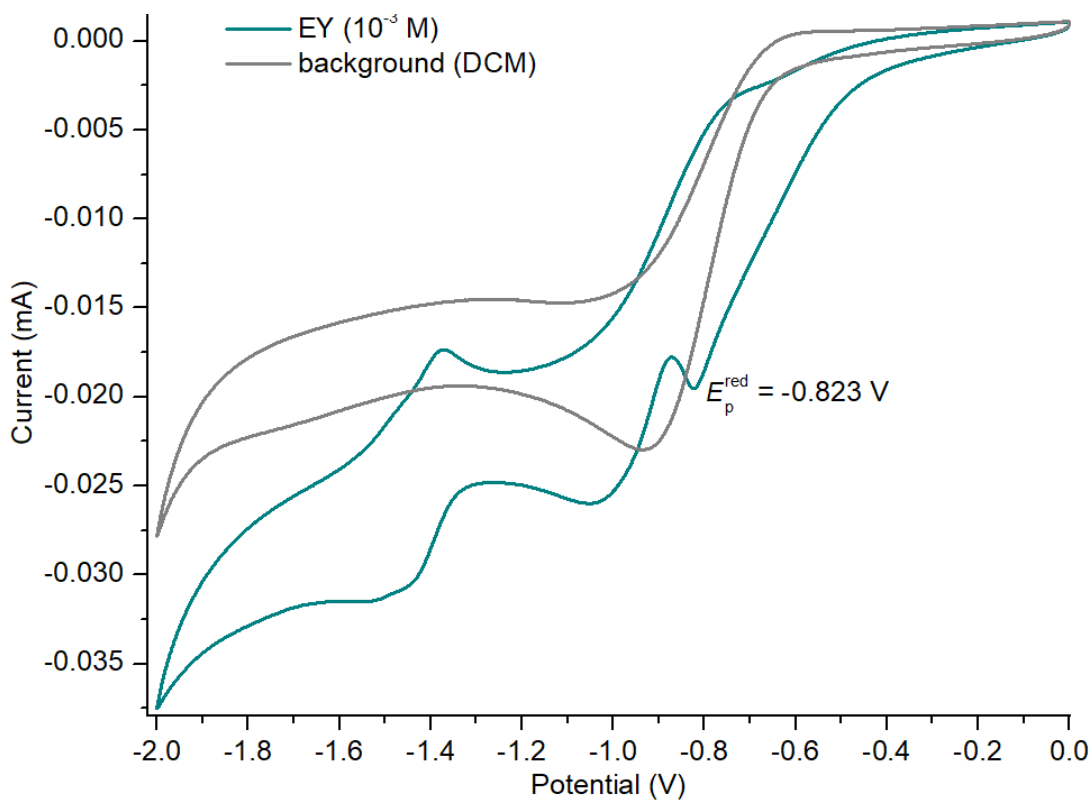

**Figure S15** Cathodic cyclic voltammograms of eosin Y ( $10^{-3}$  M) in  $\text{CH}_2\text{Cl}_2$

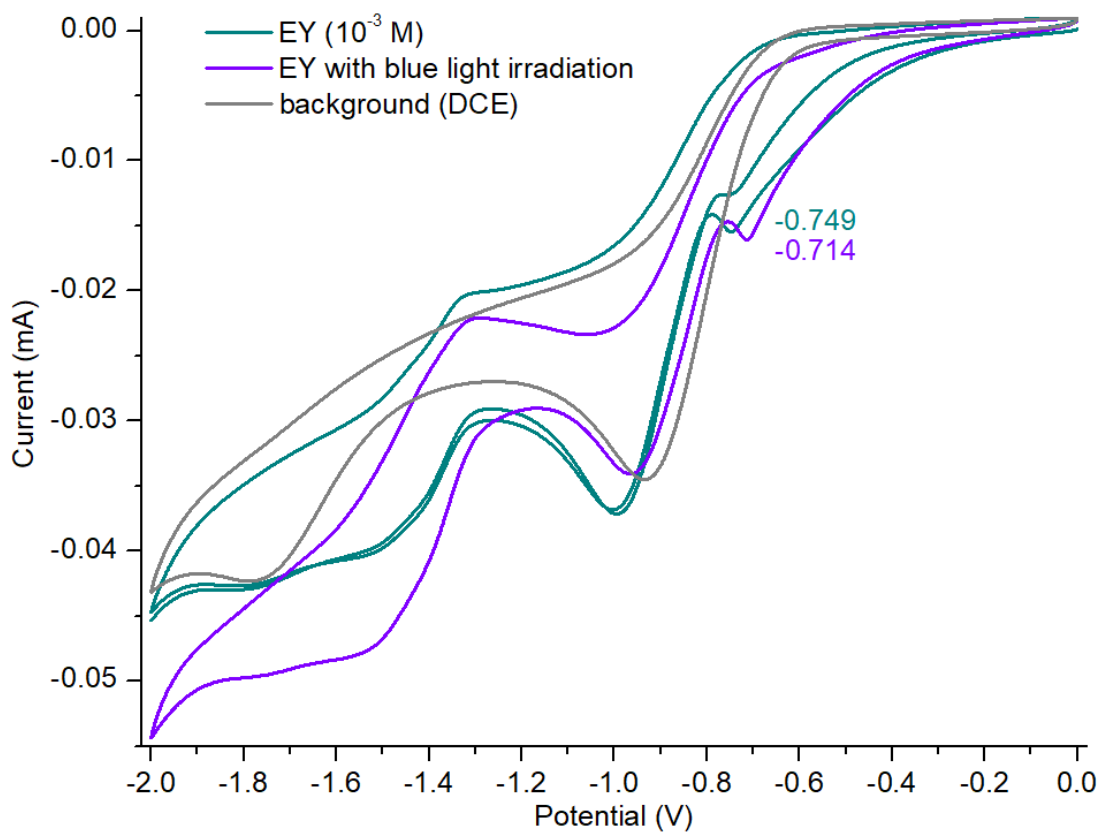

**Figure S16** Cathodic cyclic voltammograms of eosin Y ( $10^{-3}$  M) in DCE

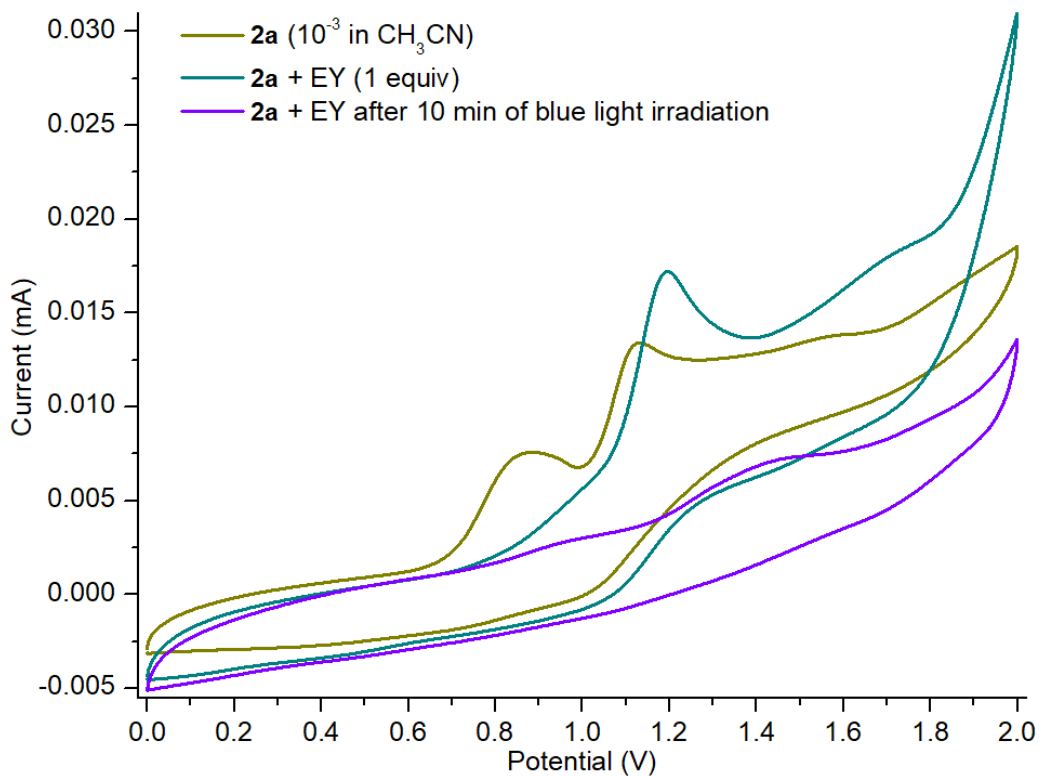

**Figure S17** Anodic cyclic voltammogram of **2a** ( $10^{-3}$  M) and an equimolar mixture of **2a** and EY ( $10^{-3}$  M) with or without 10 min of blue light irradiation

## 5. Fluorescence spectra

Fluorescence spectra were collected on a Cary Eclipse Fluorescence Spectrophotometer (Agilent Technologies). It has been established that **2a** could attenuate eosin Y fluorescence,<sup>[3]</sup> although those experiments were troubled by aggregation-induced emission (AIE).

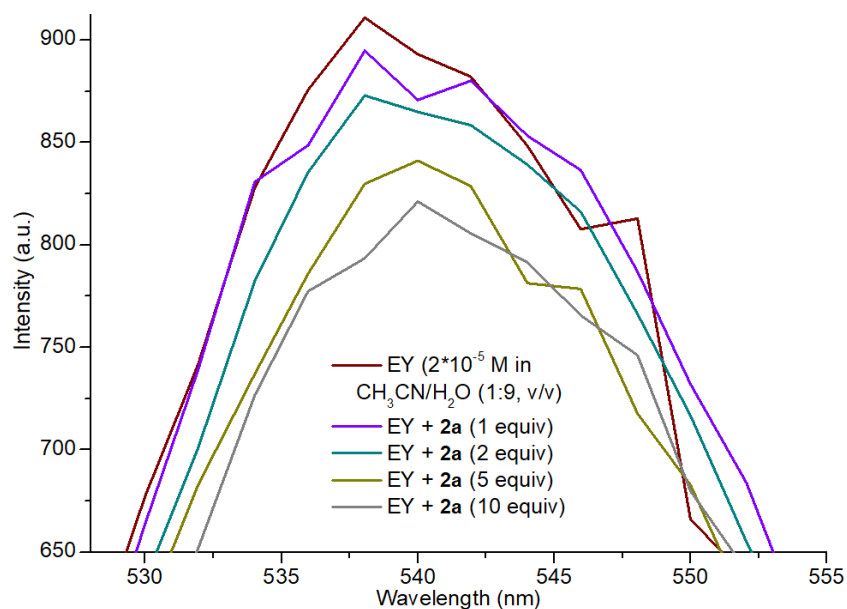

**Figure S18** Fluorescence quenching of eosin Y ( $2 \times 10^{-5}$  M) in the presence of **2a** in  $\text{CH}_3\text{CN}/\text{H}_2\text{O}$  (1:9, v/v). The solution was excited at 455 nm (ex. slit 10 nm, em. slit 10 nm).

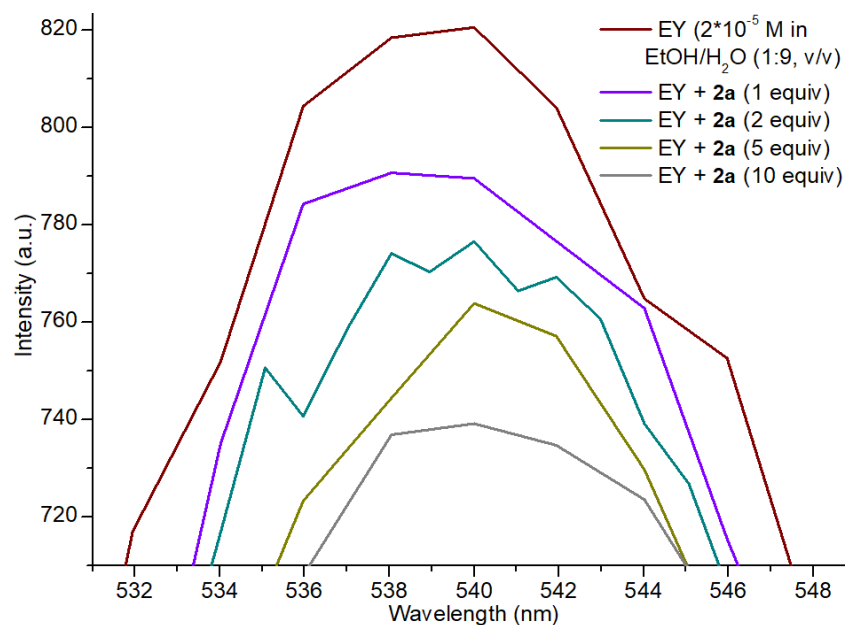

**Figure S19** Fluorescence quenching of eosin Y ( $2 \times 10^{-5}$  M) in the presence of **2a** in  $\text{EtOH}/\text{H}_2\text{O}$  (1:9, v/v). The solution was excited at 455 nm (ex. slit 10 nm, em. slit 10 nm).

[3] a) J. Jeon, Y.-T. He, S. Shin and S. Hong, *Angew. Chem. Int. Ed.*, 2020, **59**, 281–285; b) Y.-T. He, D. Kang, I. Kim and S. Hong, *Green Chem.*, 2018, **20**, 5209–5214.

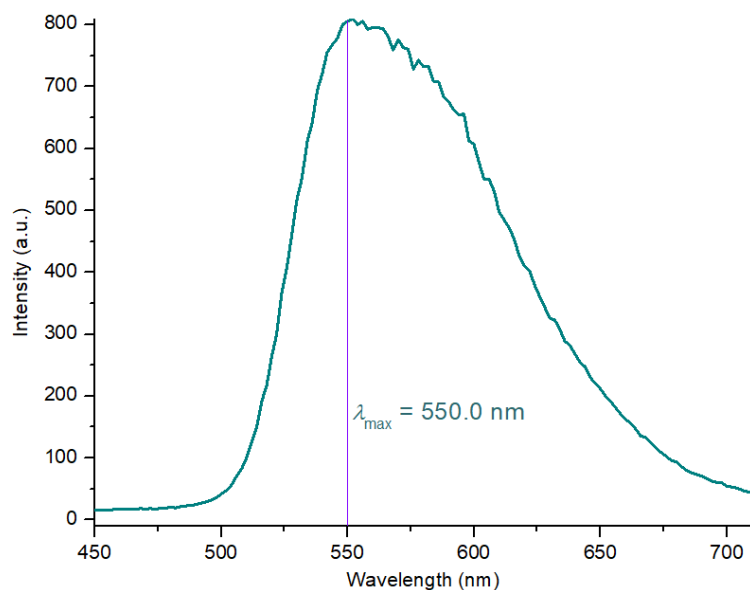

**Figure S20** Fluorescence of eosin Y ( $10^{-3}$  M) in  $\text{CH}_3\text{CN}$ . The solution was excited at 366 nm (ex. slit 10 nm, em. slit 10 nm)

## 6. UV-Vis spectroscopic measurements

The UV-Vis absorption spectra were collected on a UV-2450 UV-Visible spectrophotometer (Shimadzu, Japan). A significant bathochromic shift was observed upon mixing eosin Y with **2a**.

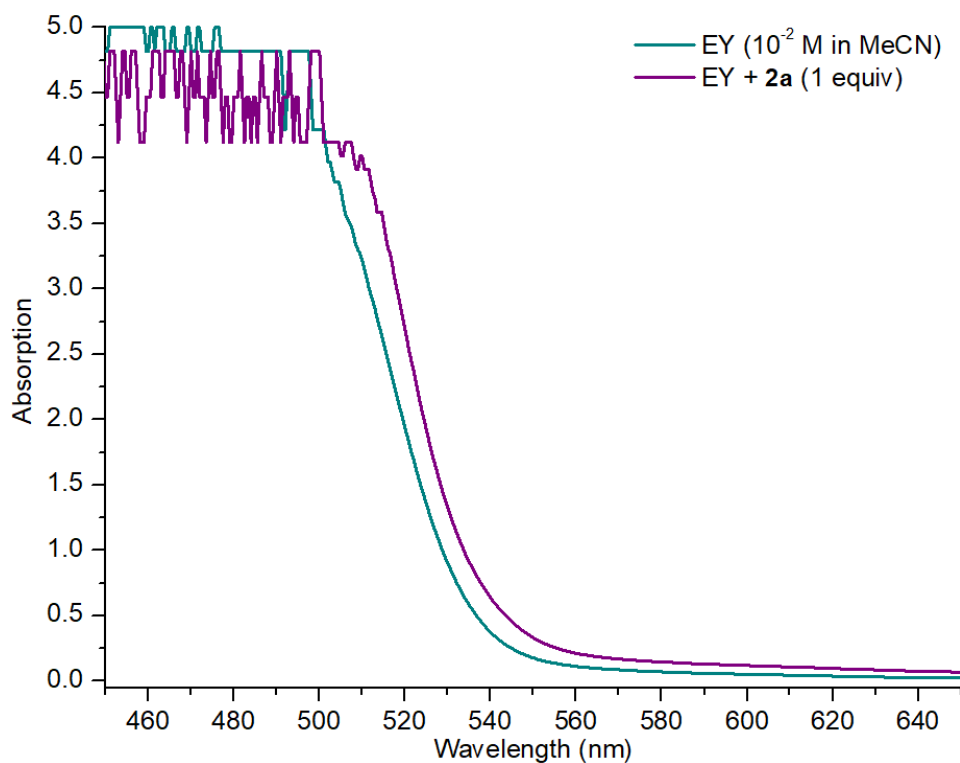

**Figure S21** UV-vis spectra of EY ( $10^{-2}$  M) and an equimolar mixture of EY and **2a** ( $10^{-2}$  M) in  $\text{CH}_3\text{CN}$

## 7. Determination of the excited-state reduction potential of eosin Y in MeCN

The excited-state reduction potential of eosin Y ( $E[\text{EY}^*/\text{EY}^{\bullet-}]$ ) is estimated to be 1.51 V vs. Ag/AgCl according to the following equations:

$$E^{\text{red}*}(\text{EY}^*/\text{EY}^{\bullet-}) = E^{\text{red}}(\text{EY}^*/\text{EY}^{\bullet-}) + E_{0,0}$$

where  $E^{\text{red}}(\text{EY}^*/\text{EY}^{\bullet-}, -0.741 \text{ V})$  was obtained from its cyclic voltammetry spectrum (Figure S13);  $E_{0,0}$  is calculated from its photoluminescence maximum (550 nm as shown in Figure S20) using the equation  $E_{0,0} = hc/\lambda_{\text{max}} = 1240 \text{ nm}/550 \text{ nm}$ .

## 8. Hydrogen detection tests

The hydrogen detection tests were conducted with a  $\text{H}_2$  detector (XLA-BX-H2), which was connected with the model reaction under standard conditions by a syringe with the pump on. The detector readings were recorded (Figure S22).

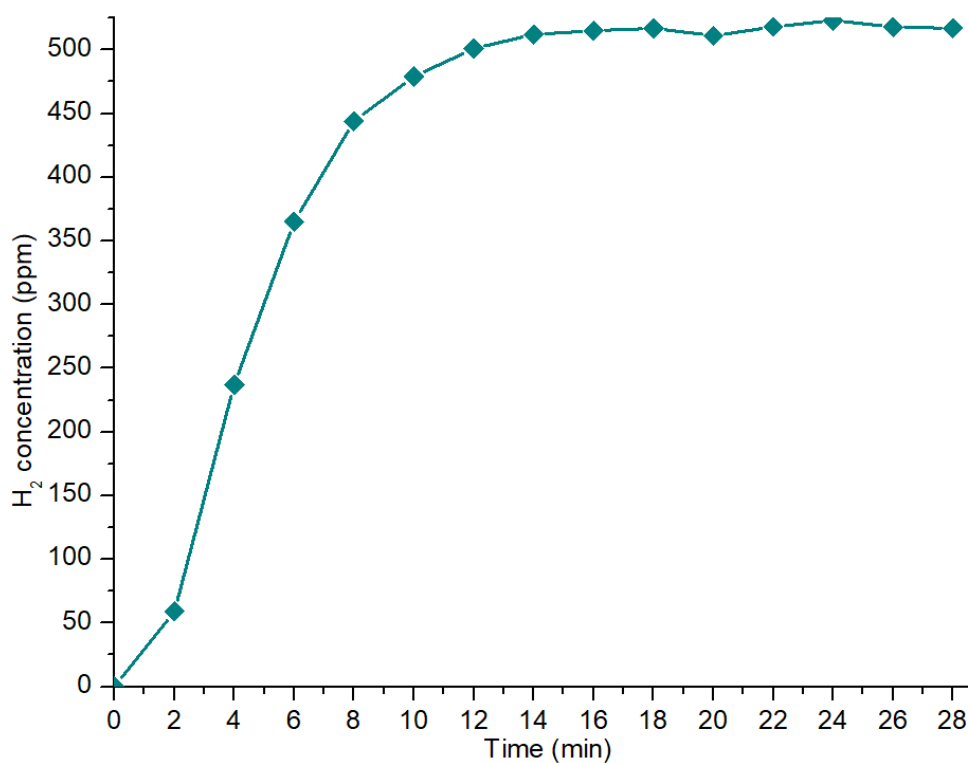

|           | A(X) | B(Y)             |
|-----------|------|------------------|
| Long Name | Time | H2 concentration |
| Units     | min  | ppm              |
| Comments  |      |                  |
| 1         | 0    | 0                |
| 2         | 2    | 59               |
| 3         | 4    | 237              |
| 4         | 6    | 365              |
| 5         | 8    | 444              |
| 6         | 10   | 479              |
| 7         | 12   | 501              |
| 8         | 14   | 512              |
| 9         | 16   | 515              |
| 10        | 18   | 517              |
| 11        | 20   | 511              |
| 12        | 22   | 518              |
| 13        | 24   | 523              |
| 14        | 26   | 518              |
| 15        | 28   | 517              |

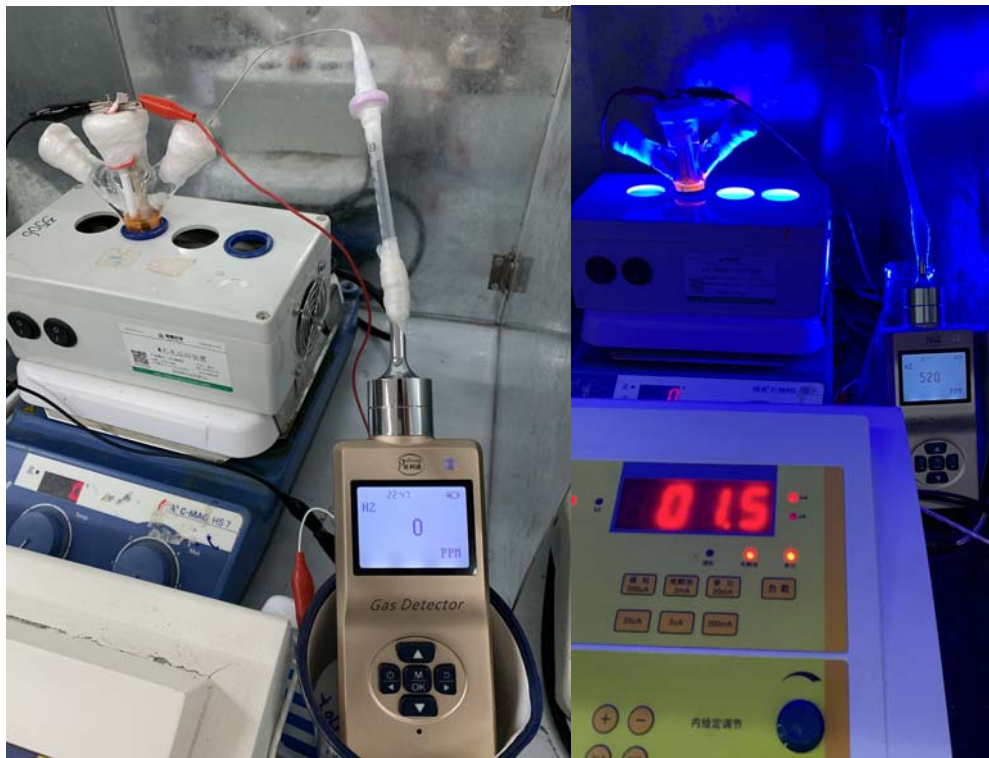

Figure S22 Hydrogen detection tests



## VI. Spectral data of products and new compounds

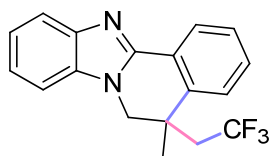

5-Methyl-5-(2,2,2-trifluoroethyl)-5,6-dihydrobenzo[4,5]imidazo[2,1-*a*]isoquinoline (**3a**),<sup>[4]</sup> isolated by flash column chromatography (petroleum ether/EtOAc = 20:1, v/v) in 83% yield (79.1 mg), colorless oil. *R<sub>f</sub>* (petroleum ether/EtOAc = 5:1, v/v) 0.33. <sup>1</sup>H NMR (400 MHz, CDCl<sub>3</sub>) δ 8.37 – 8.35 (m, 1H), 7.87 – 7.83 (m, 1H), 7.52 – 7.45 (m, 3H), 7.41 – 7.36 (m, 1H), 7.35 – 7.29 (m, 2H), 4.47 (d, *J* = 13.0 Hz, 1H), 3.98 (d, *J* = 12.9 Hz, 1H), 2.43 – 2.23 (m, 2H), 1.74 (d, *J* = 1.4 Hz, 3H). <sup>13</sup>C{<sup>1</sup>H} NMR (101 MHz, CDCl<sub>3</sub>) δ 148.4, 143.9, 140.7, 134.6, 130.9, 128.4, 126.3, 126.0 (q, *J* = 277.4 Hz), 125.3, 124.8, 123.1, 122.8, 119.9, 109.1, 49.4 (q, *J* = 2.1 Hz), 41.6 (q, *J* = 26.9 Hz), 36.3 (q, *J* = 1.6 Hz), 22.6 (q, *J* = 1.9 Hz). <sup>19</sup>F NMR (376 MHz, CDCl<sub>3</sub>) δ -59.65 (t, *J* = 11.8 Hz, 3F). HRMS (ESI-TOF) Calcd for C<sub>18</sub>H<sub>16</sub>F<sub>3</sub>N<sub>2</sub><sup>+</sup> ([M+H]<sup>+</sup>) 317.1260. Found 317.1258.

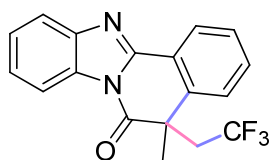

5-Methyl-5-(2,2,2-trifluoroethyl)benzo[4,5]imidazo[2,1-*a*]isoquinolin-6(5*H*)-one (**3b**),<sup>[5]</sup> isolated by flash column chromatography (petroleum ether/EtOAc = 20:1, v/v) in 64% yield (63.3 mg), colorless oil. *R<sub>f</sub>* (petroleum ether/EtOAc = 5:1, v/v) 0.33. <sup>1</sup>H NMR (400 MHz, CDCl<sub>3</sub>) δ 8.52 (dd, *J* = 7.8, 1.5 Hz, 1H), 8.38 – 8.33 (m, 1H), 7.85 – 7.82 (m, 1H), 7.62 – 7.58 (m, 1H), 7.55 – 7.51 (m, 1H), 7.49 – 7.42 (m, 3H), 3.54 – 3.42 (m, 1H), 3.00 – 2.89 (m, 1H), 1.77 (s, 3H). <sup>13</sup>C{<sup>1</sup>H} NMR (101 MHz, CDCl<sub>3</sub>) δ 171.0, 149.2, 144.0, 138.4, 131.6, 131.4, 128.4, 126.5, 126.3, 126.2, 125.8, 125.4, 124.9 (q, *J* = 277.0 Hz), 122.4, 120.0, 115.7, 45.2 (q, *J* = 2.3 Hz), 43.9 (q, *J* = 27.5 Hz), 31.0. <sup>19</sup>F NMR (376 MHz, CDCl<sub>3</sub>) δ -61.36 (t, *J* = 9.0 Hz, 3F). HRMS (ESI-TOF) Calcd for C<sub>18</sub>H<sub>14</sub>F<sub>3</sub>N<sub>2</sub>O<sup>+</sup> ([M+H]<sup>+</sup>) 331.1053. Found 331.1041.

[4] R. Kong, T. Fu, R. Yang, D. Chen, D. Liang, Y. Dong, W. Li and B. Wang, *ChemCatChem*, 2021, **13**, 2952–2958.

[5] K. Sun, G. Li, S. Guo, Z. Zhang and G. Zhang, *Org. Biomol. Chem.*, 2021, **19**, 375–378.

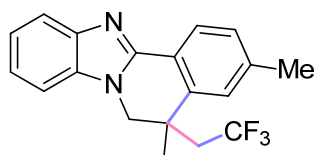

3,5-Dimethyl-5-(2,2,2-trifluoroethyl)-5,6-dihydrobenzo[4,5]imidazo[2,1-*a*]isoquinoline (**3c1**), isolated by flash column chromatography (petroleum ether/EtOAc = 20:1, v/v) in 72% yield (71.7 mg), pale yellow solid: mp 97 – 98 °C. *R<sub>f</sub>* (petroleum ether/EtOAc = 5:1, v/v) 0.33. <sup>1</sup>H NMR (400 MHz, CDCl<sub>3</sub>) δ 8.24 (d, *J* = 7.8 Hz, 1H), 7.85 – 7.81 (m, 1H), 7.39 – 7.35 (m, 1H), 7.32 – 7.28 (m, 3H), 7.26 (d, *J* = 1.4 Hz, 1H), 4.46 (d, *J* = 12.9 Hz, 1H), 3.94 (d, *J* = 12.9 Hz, 1H), 2.45 (s, 3H), 2.40 – 2.25 (m, 2H), 1.73 (d, *J* = 1.3 Hz, 3H). <sup>13</sup>C{<sup>1</sup>H} NMR (101 MHz, CDCl<sub>3</sub>) δ 148.7, 143.9, 141.3, 140.8, 134.6, 129.2, 126.3, 126.0 (q, *J* = 277.4 Hz), 125.4, 122.9, 122.7, 122.5, 119.7, 109.0, 49.3 (q, *J* = 2.2 Hz), 41.5 (q, *J* = 26.8 Hz), 36.2 (q, *J* = 1.8 Hz), 22.5 (q, *J* = 1.9 Hz), 21.9. <sup>19</sup>F NMR (376 MHz, CDCl<sub>3</sub>) δ -59.66 (t, *J* = 10.8 Hz, 3F). HRMS (ESI-TOF) Calcd for C<sub>19</sub>H<sub>18</sub>F<sub>3</sub>N<sub>2</sub><sup>+</sup> ([M+H]<sup>+</sup>) 331.1417. Found 331.1420.

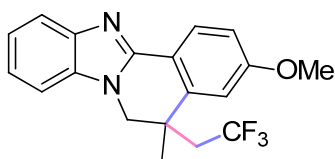

3-Methoxy-5-methyl-5-(2,2,2-trifluoroethyl)-5,6-dihydrobenzo[4,5]imidazo[2,1-*a*]isoquinoline (**3c2**), isolated by flash column chromatography (petroleum ether/EtOAc = 20:1, v/v) in 77% yield (63.9 mg), pale yellow solid: mp 124 – 125 °C. *R<sub>f</sub>* (petroleum ether/EtOAc = 5:1, v/v) 0.33. <sup>1</sup>H NMR (400 MHz, CDCl<sub>3</sub>) δ 8.30 (d, *J* = 8.4 Hz, 1H), 7.83 – 7.79 (m, 1H), 7.36 – 7.33 (m, 1H), 7.31 – 7.28 (m, 2H), 7.01 – 6.97 (m, 2H), 4.45 (d, *J* = 12.9 Hz, 1H), 3.93 (d, *J* = 12.9 Hz, 1H), 3.90 (s, 3H), 2.42 – 2.21 (m, 2H), 1.71 (d, *J* = 1.3 Hz, 3H). <sup>13</sup>C{<sup>1</sup>H} NMR (101 MHz, CDCl<sub>3</sub>) δ 161.7, 148.7, 143.9, 142.8, 134.6, 128.1, 126.0 (q, *J* = 279.0 Hz), 122.6 (q, *J* = 3.0 Hz), 119.5, 118.0, 112.8, 111.6, 108.9, 55.5, 49.31 (q, *J* = 2.1 Hz), 41.5 (q, *J* = 27.1 Hz), 36.38 (q, *J* = 1.8 Hz), 22.5 (q, *J* = 1.4 Hz). <sup>19</sup>F NMR (376 MHz, CDCl<sub>3</sub>) δ -59.64 (t, *J* = 11.2 Hz, 3F). HRMS (ESI-TOF) Calcd for C<sub>19</sub>H<sub>18</sub>F<sub>3</sub>N<sub>2</sub>O<sup>+</sup> ([M+H]<sup>+</sup>) 347.1366. Found 347.1370.

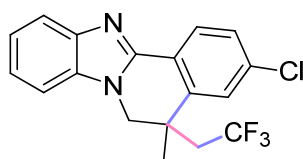

3-Chloro-5-methyl-5-(2,2,2-trifluoroethyl)-5,6-dihydrobenzo[4,5]imidazo[2,1-*a*]isoqu

inoline (**3c3**), isolated by flash column chromatography (petroleum ether/EtOAc = 20:1, v/v) in 68% yield (71.1 mg), white solid: mp 142 – 143 °C.  $R_f$  (petroleum ether/EtOAc = 5:1, v/v) 0.33.  $^1\text{H}$  NMR (400 MHz,  $\text{CDCl}_3$ )  $\delta$  8.28 (dd,  $J = 7.0, 0.8$  Hz, 1H), 7.85 – 7.80 (m, 1H), 7.44 (d,  $J = 8.0$  Hz, 2H), 7.38 – 7.29 (m, 3H), 4.45 (d,  $J = 13.0$  Hz, 1H), 3.95 (d,  $J = 13.0$  Hz, 1H), 2.41 – 2.22 (m, 2H), 1.72 (d,  $J = 1.5$  Hz, 3H).  $^{13}\text{C}\{^1\text{H}\}$  NMR (101 MHz,  $\text{CDCl}_3$ )  $\delta$  147.5, 143.8, 142.3, 136.8, 134.6, 128.8, 127.7, 125.8 (q,  $J = 277.3$  Hz), 125.4, 123.9, 123.4, 123.0, 120.0, 109.1, 49.3 (d,  $J = 2.2$  Hz), 41.4 (q,  $J = 27.2$  Hz), 36.5 (q,  $J = 1.6$  Hz), 22.5 (q,  $J = 1.9$  Hz).  $^{19}\text{F}$  NMR (376 MHz,  $\text{CDCl}_3$ )  $\delta$  -59.63 (t,  $J = 10.5$  Hz, 3F). HRMS (ESI-TOF) Calcd for  $\text{C}_{18}\text{H}_{15}\text{ClF}_3\text{N}_2^+$  ( $[\text{M}+\text{H}]^+$ ) 351.0870. Found 351.0872.

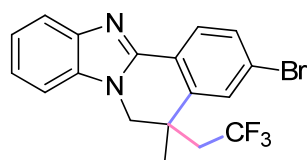

3-Bromo-5-methyl-5-(2,2,2-trifluoroethyl)-5,6-dihydrobenzo[4,5]imidazo[2,1-*a*]isoquinoline (**3c4**), isolated by flash column chromatography (petroleum ether/EtOAc = 20:1, v/v) in 81% yield (95.9 mg), white solid: mp 143 – 144 °C.  $R_f$  (petroleum ether/EtOAc = 5:1, v/v) 0.33.  $^1\text{H}$  NMR (400 MHz,  $\text{CDCl}_3$ )  $\delta$  8.20 (d,  $J = 8.1$  Hz, 1H), 7.85 – 7.80 (m, 1H), 7.63 – 7.58 (m, 2H), 7.38 – 7.28 (m, 3H), 4.44 (d,  $J = 13.0$  Hz, 1H), 3.93 (d,  $J = 13.0$  Hz, 1H), 2.40 – 2.21 (m, 2H), 1.72 (s, 3H).  $^{13}\text{C}\{^1\text{H}\}$  NMR (101 MHz,  $\text{CDCl}_3$ )  $\delta$  147.5, 143.8, 142.5, 134.6, 131.7, 128.3, 127.8, 125.8 (q,  $J = 277.3$  Hz), 125.1, 124.3, 123.4, 123.0, 120.0, 109.2, 49.2 (q,  $J = 2.2$  Hz), 41.4 (q,  $J = 27.1$  Hz), 36.4 (q,  $J = 1.6$  Hz), 22.4 (q,  $J = 1.9$  Hz).  $^{19}\text{F}$  NMR (376 MHz,  $\text{CDCl}_3$ )  $\delta$  -59.62 (t,  $J = 11.1$  Hz, 3F). HRMS (ESI-TOF) Calcd for  $\text{C}_{18}\text{H}_{15}\text{BrF}_3\text{N}_2^+$  ( $[\text{M}+\text{H}]^+$ ) 395.0365. Found 395.0361.

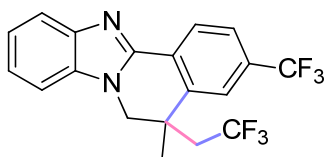

5-Methyl-5-(2,2,2-trifluoroethyl)-3-(trifluoromethyl)-5,6-dihydrobenzo[4,5]imidazo[2,1-*a*]isoquinoline (**3c5**), isolated by flash column chromatography (petroleum ether/EtOAc = 20:1, v/v) in 87% yield (100.2 mg), white solid: mp 160 – 161 °C.  $R_f$  (petroleum ether/EtOAc = 5:1, v/v) 0.33.  $^1\text{H}$  NMR (400 MHz,  $\text{CDCl}_3$ )  $\delta$  8.47 (d,  $J = 8.1$  Hz, 1H), 7.89 – 7.84 (m, 1H), 7.74 (d,  $J = 8.2$  Hz, 1H), 7.70 (s, 1H), 7.43 – 7.39 (m, 1H), 7.39 – 7.32 (m, 2H), 4.51 (d,  $J = 13.1$  Hz, 1H), 4.01 (d,  $J = 13.0$  Hz, 1H),

2.45 – 2.26 (m, 2H), 1.79 (s, 3H).  $^{13}\text{C}\{^1\text{H}\}$  NMR (101 MHz,  $\text{CDCl}_3$ )  $\delta$  146.9, 143.9, 141.1, 134.6, 132.3 (q,  $J = 32.6$  Hz), 128.6 (q,  $J = 1.6$  Hz), 126.7, 125.4 (q,  $J = 3.7$  Hz), 125.8 (q,  $J = 279.0$  Hz), 123.8, 123.7 (q,  $J = 272.6$  Hz), 123.3, 122.1 (q,  $J = 3.8$  Hz), 120.3, 109.3, 49.4 (q,  $J = 2.0$  Hz), 41.5 (q,  $J = 27.4$  Hz), 36.5 (q,  $J = 1.6$  Hz), 22.5 (q,  $J = 2.1$  Hz).  $^{19}\text{F}$  NMR (376 MHz,  $\text{CDCl}_3$ )  $\delta$  -59.66 (t,  $J = 11.2$  Hz, 3F), -62.79 (s, 3F). HRMS (ESI-TOF) Calcd for  $\text{C}_{19}\text{H}_{15}\text{F}_6\text{N}_2^+$  ( $[\text{M}+\text{H}]^+$ ) 385.1134. Found 385.1135.

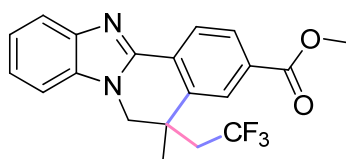

### Methyl

5-methyl-5-(2,2,2-trifluoroethyl)-5,6-dihydrobenzo[4,5]imidazo[2,1-*a*]isoquinoline-3-carboxylate (**3c6**), isolated by flash column chromatography (petroleum ether/EtOAc = 20:1, v/v) in 75% yield (84.5 mg), white solid: mp 186 – 187 °C.  $R_f$  (petroleum ether/EtOAc = 5:1, v/v) 0.33.  $^1\text{H}$  NMR (400 MHz,  $\text{CDCl}_3$ )  $\delta$  8.42 (d,  $J = 8.0$  Hz, 1H), 8.15 – 8.12 (m, 2H), 7.88 – 7.84 (m, 1H), 7.43 – 7.31 (m, 3H), 4.51 (d,  $J = 13.0$  Hz, 1H), 4.02 (d,  $J = 13.1$  Hz, 1H), 3.97 (s, 3H), 2.46 – 2.28 (m, 2H), 1.79 (s, 3H).  $^{13}\text{C}\{^1\text{H}\}$  NMR (101 MHz,  $\text{CDCl}_3$ )  $\delta$  166.3, 147.3, 144.0, 140.7, 134.7, 131.9, 129.5, 129.3, 126.32, 126.28, 125.9 (q,  $J = 277.2$  Hz), 123.7, 123.2, 120.3, 109.3, 52.5, 49.3 (d,  $J = 2.0$  Hz), 41.5 (q,  $J = 27.0$  Hz), 36.5 (d,  $J = 1.7$  Hz), 22.7 (d,  $J = 2.0$  Hz).  $^{19}\text{F}$  NMR (376 MHz,  $\text{CDCl}_3$ )  $\delta$  -59.63 (t,  $J = 10.7$  Hz, 3F). HRMS (ESI-TOF) Calcd for  $\text{C}_{20}\text{H}_{18}\text{F}_3\text{N}_2\text{O}_2^+$  ( $[\text{M}+\text{H}]^+$ ) 375.1315. Found 375.1313.

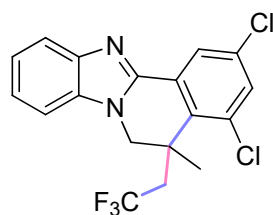

2,4-Dichloro-5-methyl-5-(2,2,2-trifluoroethyl)-5,6-dihydrobenzo[4,5]imidazo[2,1-*a*]isoquinoline (**3d**), isolated by flash column chromatography (petroleum ether/EtOAc = 20:1, v/v) in 62% yield (71.4 mg), white solid: mp 219 – 220 °C.  $R_f$  (petroleum ether/EtOAc = 5:1, v/v) 0.33.  $^1\text{H}$  NMR (400 MHz,  $\text{CDCl}_3$ )  $\delta$  8.38 (d,  $J = 2.3$  Hz, 1H), 7.84 – 7.80 (m, 1H), 7.49 (d,  $J = 2.3$  Hz, 1H), 7.42 – 7.38 (m, 1H), 7.37 – 7.31 (m, 2H), 4.55 (d,  $J = 13.3$  Hz, 1H), 3.97 (d,  $J = 13.4$  Hz, 1H), 2.70 – 2.49 (m, 2H), 1.95 (s,

3H).  $^{13}\text{C}\{^1\text{H}\}$  NMR (101 MHz,  $\text{CDCl}_3$ )  $\delta$  147.0, 143.9, 135.9, 135.0, 134.5, 134.1, 133.2, 129.3, 125.8 (q,  $J = 277.4$  Hz), 125.3, 123.8, 123.3, 120.1, 109.4, 49.5 (q,  $J = 2.3$  Hz), 38.7 (q,  $J = 27.1$  Hz), 38.0 (q,  $J = 1.9$  Hz), 24.3 (q,  $J = 1.8$  Hz).  $^{19}\text{F}$  NMR (376 MHz,  $\text{CDCl}_3$ )  $\delta$  -59.63 (t,  $J = 10.7$  Hz, 3F). HRMS (ESI-TOF) Calcd for  $\text{C}_{18}\text{H}_{14}\text{Cl}_2\text{F}_3\text{N}_2^+$  ( $[\text{M}+\text{H}]^+$ ) 385.0481. Found 385.0484.

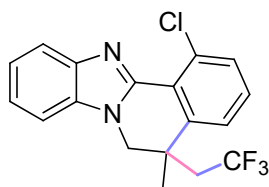

1-Chloro-5-methyl-5-(2,2,2-trifluoroethyl)-5,6-dihydrobenzo[4,5]imidazo[2,1-*a*]isoquinoline (**3e**), isolated by flash column chromatography (petroleum ether/EtOAc = 20:1, v/v) in 62% yield (65.0 mg), white solid: mp 157 – 158 °C.  $R_f$  (petroleum ether/EtOAc = 5:1, v/v) 0.33.  $^1\text{H}$  NMR (400 MHz,  $\text{CDCl}_3$ )  $\delta$  7.98 – 7.95 (m, 1H), 7.58 – 7.54 (m, 1H), 7.40 (s, 1H), 7.39 (d,  $J = 2.2$  Hz, 1H), 7.38 – 7.30 (m, 3H), 4.44 (d,  $J = 13.1$  Hz, 1H), 3.99 (dd,  $J = 13.1, 1.1$  Hz, 1H), 2.20 – 2.11 (m, 2H), 1.72 (d,  $J = 1.3$  Hz, 3H).  $^{13}\text{C}\{^1\text{H}\}$  NMR (101 MHz,  $\text{CDCl}_3$ )  $\delta$  145.5, 143.7, 143.5, 133.6, 133.4, 131.5, 130.5, 125.8 (q,  $J = 277.3$  Hz), 123.9, 123.8, 123.6, 122.8, 120.9, 108.9, 49.1 (q,  $J = 1.9$  Hz), 40.8 (q,  $J = 27.2$  Hz), 37.1 (q,  $J = 1.8$  Hz), 22.5 (q,  $J = 2.0$  Hz).  $^{19}\text{F}$  NMR (376 MHz,  $\text{CDCl}_3$ )  $\delta$  -59.56 (t,  $J = 11.7$  Hz, 3F). HRMS (ESI-TOF) Calcd for  $\text{C}_{18}\text{H}_{15}\text{ClF}_3\text{N}_2^+$  ( $[\text{M}+\text{H}]^+$ ) 351.0870. Found 351.0868.

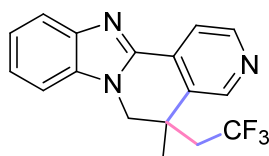

5-Methyl-5-(2,2,2-trifluoroethyl)-5,6-dihydrobenzo[4,5]imidazo[2,1-*a*][2,6]naphthyridine (**3f**), isolated by flash column chromatography (petroleum ether/EtOAc = 20:1, v/v) in 88% yield (83.5 mg), brown solid: mp 128 – 129 °C.  $R_f$  (petroleum ether/EtOAc = 5:1, v/v) 0.33.  $^1\text{H}$  NMR (400 MHz,  $\text{CDCl}_3$ )  $\delta$  8.79 – 8.74 (m, 2H), 8.15 (d,  $J = 4.9$  Hz, 1H), 7.90 – 7.86 (m, 1H), 7.44 – 7.34 (m, 3H), 4.51 (d,  $J = 13.1$  Hz, 1H), 4.05 (d,  $J = 13.0$  Hz, 1H), 2.49 – 2.32 (m, 2H), 1.83 (d,  $J = 1.3$  Hz, 3H).  $^{13}\text{C}\{^1\text{H}\}$  NMR (101 MHz,  $\text{CDCl}_3$ )  $\delta$  150.0, 147.0, 145.7, 143.9, 134.7, 134.4, 132.3, 125.7 (q,  $J = 277.1$  Hz), 124.3, 123.5, 120.6, 118.9, 109.5, 49.7 (q,  $J = 2.1$  Hz), 41.6 (q,  $J = 27.2$  Hz), 35.3, 22.4 (q,  $J = 1.9$  Hz).  $^{19}\text{F}$  NMR (376 MHz,  $\text{CDCl}_3$ )  $\delta$  -59.63 (t,  $J = 10.6$  Hz, 3F). HRMS (ESI-TOF) Calcd for  $\text{C}_{17}\text{H}_{15}\text{F}_3\text{N}_3^+$  ( $[\text{M}+\text{H}]^+$ ) 318.1213. Found

318.1216.

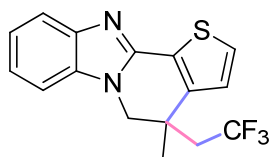

4-Methyl-4-(2,2,2-trifluoroethyl)-4,5-dihydrobenzo[4,5]imidazo[1,2-*a*]thieno[2,3-*c*]pyridine (**3g**), isolated by flash column chromatography (petroleum ether/EtOAc = 20:1, v/v) in 42% yield (40.4 mg), pale yellow oil.  $R_f$  (petroleum ether/EtOAc = 5:1, v/v) 0.33.  $^1\text{H}$  NMR (400 MHz,  $\text{CDCl}_3$ )  $\delta$  7.80 – 7.78 (m, 1H), 7.47 (d,  $J = 5.1$  Hz, 1H), 7.35 – 7.26 (m, 3H), 7.09 (d,  $J = 5.1$  Hz, 1H), 4.41 (d,  $J = 12.9$  Hz, 1H), 3.95 (d,  $J = 12.9$  Hz, 1H), 2.42 (q,  $J = 11.2$  Hz, 2H), 1.68 (s, 3H).  $^{13}\text{C}\{^1\text{H}\}$  NMR (101 MHz,  $\text{CDCl}_3$ )  $\delta$  145.9, 145.3, 143.9, 134.4, 128.8, 126.2, 126.0 (q,  $J = 277.1$  Hz), 124.8, 123.2, 122.7, 119.8, 109.0, 51.0 (q,  $J = 2.2$  Hz), 41.4 (q,  $J = 27.0$  Hz), 36.0 (q,  $J = 1.9$  Hz), 23.3 (q,  $J = 1.9$  Hz).  $^{19}\text{F}$  NMR (376 MHz,  $\text{CDCl}_3$ )  $\delta$  -59.74 (t,  $J = 10.8$  Hz, 3F). HRMS (ESI-TOF) Calcd for  $\text{C}_{16}\text{H}_{14}\text{F}_3\text{N}_2\text{S}^+$  ( $[\text{M}+\text{H}]^+$ ) 323.0824. Found 323.0829.

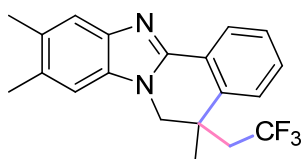

5,9,10-Trimethyl-5-(2,2,2-trifluoroethyl)-5,6-dihydrobenzo[4,5]imidazo[2,1-*a*]isoquinoline (**3h1**), isolated by flash column chromatography (petroleum ether/EtOAc = 20:1, v/v) in 72% yield (74.6 mg), yellowish solid: mp 133 – 134 °C.  $R_f$  (petroleum ether/EtOAc = 5:1, v/v) 0.33.  $^1\text{H}$  NMR (400 MHz,  $\text{CDCl}_3$ )  $\delta$  8.33 – 8.30 (m, 1H), 7.60 (s, 1H), 7.49 – 7.42 (m, 3H), 7.14 (s, 1H), 4.41 (d,  $J = 12.9$  Hz, 1H), 3.93 (d,  $J = 12.9$  Hz, 1H), 2.41 (s, 3H), 2.40 (s, 3H), 2.37 – 2.24 (m, 2H), 1.72 (d,  $J = 1.4$  Hz, 3H).  $^{13}\text{C}\{^1\text{H}\}$  NMR (101 MHz,  $\text{CDCl}_3$ )  $\delta$  147.6, 142.5, 140.4, 133.2, 132.4, 131.7, 130.4, 128.3, 126.1, 126.0 (q,  $J = 277.3$  Hz), 125.6, 124.7, 119.9, 109.3, 49.4 (q,  $J = 1.6$  Hz), 41.5 (q,  $J = 26.9$  Hz), 36.3 (q,  $J = 1.4$  Hz), 22.5 (q,  $J = 1.3$  Hz), 20.6, 20.4.  $^{19}\text{F}$  NMR (376 MHz,  $\text{CDCl}_3$ )  $\delta$  -59.64 (t,  $J = 11.4$  Hz, 3F). HRMS (ESI-TOF) Calcd for  $\text{C}_{20}\text{H}_{20}\text{F}_3\text{N}_2^+$  ( $[\text{M}+\text{H}]^+$ ) 345.1573. Found 345.1588.

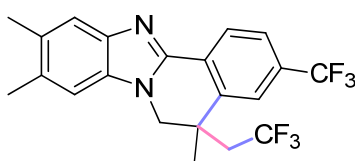

5,9,10-Trimethyl-5-(2,2,2-trifluoroethyl)-3-(trifluoromethyl)-5,6-dihydrobenzo[4,5]i

midazo[2,1-*a*]isoquinoline (**3h2**), isolated by flash column chromatography (petroleum ether/EtOAc = 20:1, v/v) in 69% yield (84.8 mg), white solid: mp 180 – 181 °C. *R<sub>f</sub>* (petroleum ether/EtOAc = 5:1, v/v) 0.33. <sup>1</sup>H NMR (400 MHz, CDCl<sub>3</sub>) δ 8.42 (d, *J* = 8.1 Hz, 1H), 7.73 – 7.70 (m, 1H), 7.67 (d, *J* = 1.6 Hz, 1H), 7.61 (s, 1H), 7.16 (s, 1H), 4.45 (d, *J* = 13.0 Hz, 1H), 3.96 (d, *J* = 13.0 Hz, 1H), 2.42 (s, 3H), 2.40 (s, 3H), 2.38 – 2.24 (m, 2H), 1.77 (d, *J* = 1.4 Hz, 3H). <sup>13</sup>C{<sup>1</sup>H} NMR (101 MHz, CDCl<sub>3</sub>) δ 146.1, 142.5, 140.8, 133.3, 133.2, 132.4, 131.9 (d, *J* = 32.4 Hz), 128.9, 126.4, 125.8 (q, *J* = 277.2 Hz), 125.3 (q, *J* = 3.8 Hz), 123.8 (q, *J* = 270.8 Hz), 122.0 (q, *J* = 3.8 Hz), 120.2, 109.4, 49.3 (q, *J* = 2.1 Hz), 41.4 (q, *J* = 27.1 Hz), 36.5 (q, *J* = 1.8 Hz), 22.4 (q, *J* = 1.9 Hz), 20.7, 20.4. <sup>19</sup>F NMR (376 MHz, CDCl<sub>3</sub>) δ -59.64 (t, *J* = 11.8 Hz, 3F), -62.73 (s, 3F). HRMS (ESI-TOF) Calcd for C<sub>21</sub>H<sub>19</sub>F<sub>6</sub>N<sub>2</sub><sup>+</sup> ([M+H]<sup>+</sup>) 413.1447. Found 413.1451.

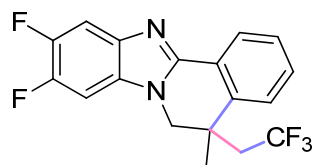

9,10-Difluoro-5-methyl-5-(2,2,2-trifluoroethyl)-5,6-dihydrobenzo[4,5]imidazo[2,1-*a*]isoquinoline (**3i**), isolated by flash column chromatography (petroleum ether/EtOAc = 20:1, v/v) in 83% yield (87.3 mg), white solid: mp 178 – 179 °C. *R<sub>f</sub>* (petroleum ether/EtOAc = 5:1, v/v) 0.33. <sup>1</sup>H NMR (400 MHz, CDCl<sub>3</sub>) δ 8.30 – 8.27 (m, 1H), 7.60 (dd, *J* = 10.5, 7.2 Hz, 1H), 7.54 – 7.46 (m, 3H), 7.16 (dd, *J* = 9.6, 6.8 Hz, 1H), 4.38 (d, *J* = 13.0 Hz, 1H), 3.96 (d, *J* = 12.9 Hz, 1H), 2.41 – 2.23 (m, 2H), 1.75 (s, 3H). <sup>13</sup>C{<sup>1</sup>H} NMR (101 MHz, CDCl<sub>3</sub>) δ 149.8 (d, *J* = 3.3 Hz), 149.4 (q, *J* = 13.9 Hz), 147.0 (q, *J* = 11.1 Hz), 140.4, 139.0 (q, *J* = 9.4 Hz), 131.1, 130.0 (d, *J* = 11.0 Hz), 128.5, 126.1, 125.8 (q, *J* = 277.3 Hz), 124.75, 124.70, 107.1 (q, *J* = 19.8 Hz), 97.0 (d, *J* = 23.0 Hz), 49.4 (q, *J* = 2.2 Hz), 41.6 (q, *J* = 27.1 Hz), 36.2 (q, *J* = 1.4 Hz), 22.5 (d, *J* = 2.0 Hz). <sup>19</sup>F NMR (376 MHz, CDCl<sub>3</sub>) δ -59.82 (t, *J* = 10.7 Hz, 3F), -140.77 – -140.87 (m, 1F), -142.79 – -142.89 (m, 1F). HRMS (ESI-TOF) Calcd for C<sub>18</sub>H<sub>14</sub>F<sub>5</sub>N<sub>2</sub><sup>+</sup> ([M+H]<sup>+</sup>) 353.1072. Found 353.1071.

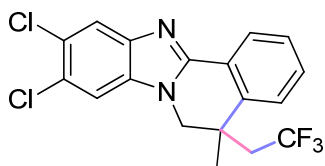

9,10-Dichloro-5-methyl-5-(2,2,2-trifluoroethyl)-5,6-dihydrobenzo[4,5]imidazo[2,1-*a*]isoquinoline (**3j1**), isolated by flash column chromatography (petroleum ether/EtOAc = 20:1, v/v) in 81% yield (93.7 mg), yellowish solid: mp 184 – 185 °C. *R<sub>f</sub>* (petroleum ether/EtOAc = 5:1, v/v) 0.33. <sup>1</sup>H NMR (400 MHz, CDCl<sub>3</sub>) δ 8.29 – 8.27 (m, 1H), 7.87 (s, 1H), 7.56 – 7.46 (m, 4H), 4.39 (d, *J* = 13.0 Hz, 1H), 3.95 (d, *J* = 12.9 Hz, 1H), 2.41 – 2.23 (m, 2H), 1.73 (s, 3H). <sup>13</sup>C{<sup>1</sup>H} NMR (101 MHz, CDCl<sub>3</sub>) δ 150.2, 143.2, 140.7, 133.9, 131.5, 128.6, 127.0, 126.8, 126.5, 125.9 (q, *J* = 277.3 Hz), 124.8, 124.5, 120.9, 110.5, 49.5 (q, *J* = 2.0 Hz), 41.7 (q, *J* = 27.1 Hz), 36.2 (q, *J* = 1.7 Hz), 22.7 (q, *J* = 2.0 Hz). <sup>19</sup>F NMR (376 MHz, CDCl<sub>3</sub>) δ -59.69 (t, *J* = 11.7 Hz, 3F). HRMS (ESI-TOF) Calcd for C<sub>18</sub>H<sub>14</sub>Cl<sub>2</sub>F<sub>3</sub>N<sub>2</sub><sup>+</sup> ([M+H]<sup>+</sup>) 385.0481. Found 385.0488.

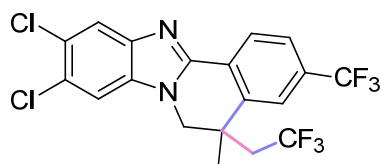

9,10-Dichloro-5-methyl-5-(2,2,2-trifluoroethyl)-3-(trifluoromethyl)-5,6-dihydrobenzo[4,5]imidazo[2,1-*a*]isoquinoline (**3j2**), isolated by flash column chromatography (petroleum ether/EtOAc = 20:1, v/v) in 92% yield (125.0 mg), white solid: mp 209 – 210 °C. *R<sub>f</sub>* (petroleum ether/EtOAc = 5:1, v/v) 0.33. <sup>1</sup>H NMR (400 MHz, CDCl<sub>3</sub>) δ 8.45 – 8.43 (m, 1H), 7.93 (s, 1H), 7.76 (ddd, *J* = 8.1, 1.7, 0.8 Hz, 1H), 7.71 (d, *J* = 1.6 Hz, 1H), 7.52 (s, 1H), 4.45 (d, *J* = 13.1 Hz, 1H), 4.01 (d, *J* = 13.1 Hz, 1H), 2.41 – 2.30 (m, 2H), 1.79 (s, 3H). <sup>13</sup>C{<sup>1</sup>H} NMR (101 MHz, CDCl<sub>3</sub>) δ 148.7, 143.2, 141.2, 133.8, 133.1, 132.8, 128.0, 127.5, 127.1, 125.63 (q, *J* = 277.2 Hz), 125.58 (q, *J* = 3.9 Hz), 123.6 (q, *J* = 271.1 Hz), 122.1 (q, *J* = 4.0 Hz), 121.4, 110.7, 49.5 (q, *J* = 1.6 Hz), 41.6 (q, *J* = 27.5 Hz), 36.5 (q, *J* = 1.0 Hz), 22.6 (q, *J* = 1.3 Hz). <sup>19</sup>F NMR (376 MHz, CDCl<sub>3</sub>) δ -59.68 (t, *J* = 10.3 Hz, 3F), -62.88 (s, 3F). HRMS (ESI-TOF) Calcd for C<sub>19</sub>H<sub>13</sub>Cl<sub>2</sub>F<sub>6</sub>N<sub>2</sub><sup>+</sup> ([M+H]<sup>+</sup>) 453.0354. Found 453.0355.

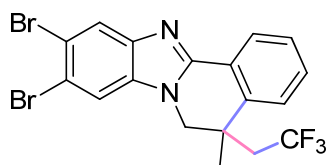

9,10-Dibromo-5-methyl-5-(2,2,2-trifluoroethyl)-5,6-dihydrobenzo[4,5]imidazo[2,1-*a*]isoquinoline (**3k**), isolated by flash column chromatography (petroleum ether/EtOAc = 20:1, v/v) in 72% yield (101.7 mg), white solid: mp 196 – 197 °C. *R<sub>f</sub>* (petroleum



ether/EtOAc = 5:1, v/v) 0.33.  $^1\text{H}$  NMR (400 MHz,  $\text{CDCl}_3$ )  $\delta$  8.30 – 8.28 (m, 1H), 8.07 (s, 1H), 7.66 (s, 1H), 7.56 – 7.46 (m, 3H), 4.39 (d,  $J$  = 13.0 Hz, 1H), 3.94 (d,  $J$  = 13.0 Hz, 1H), 2.38 – 2.26 (m, 2H), 1.73 (d,  $J$  = 0.3 Hz, 3H).  $^{13}\text{C}\{^1\text{H}\}$  NMR (101 MHz,  $\text{CDCl}_3$ )  $\delta$  150.1, 144.2, 140.8, 134.8, 131.6, 128.6, 126.6, 125.8 (q,  $J$  = 277.2 Hz), 124.9, 124.5, 124.2, 118.2, 118.0, 113.6, 49.5 (q,  $J$  = 2.0 Hz), 41.7 (q,  $J$  = 27.0 Hz), 36.2 (q,  $J$  = 1.8 Hz), 22.7 (q,  $J$  = 1.9 Hz).  $^{19}\text{F}$  NMR (376 MHz,  $\text{CDCl}_3$ )  $\delta$  -59.67 (t,  $J$  = 11.0 Hz, 3F). HRMS (ESI-TOF) Calcd for  $\text{C}_{18}\text{H}_{14}\text{Br}_2\text{F}_3\text{N}_2^+$  ( $[\text{M}+\text{H}]^+$ ) 472.9470. Found 472.9466.

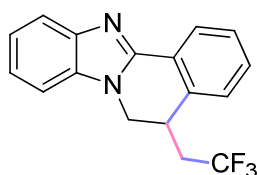

5-(2,2,2-Trifluoroethyl)-5,6-dihydrobenzo[4,5]imidazo[2,1-*a*]isoquinoline (**3l**), isolated by flash column chromatography (petroleum ether/EtOAc = 20:1, v/v) in 79% yield (71.8 mg), colorless oil.  $R_f$  (petroleum ether/EtOAc = 5:1, v/v) 0.33.  $^1\text{H}$  NMR (400 MHz,  $\text{CDCl}_3$ )  $\delta$  8.34 – 8.31 (m, 1H), 7.86 – 7.84 (m, 1H), 7.52 – 7.45 (m, 2H), 7.41 – 7.35 (m, 2H), 7.34 – 7.30 (m, 2H), 4.57 (dd,  $J$  = 13.0, 2.2 Hz, 1H), 4.28 (dd,  $J$  = 13.0, 4.2 Hz, 1H), 3.67 – 3.62 (m, 2H), 2.47 – 2.24 (m, 2H).  $^{13}\text{C}\{^1\text{H}\}$  NMR (101 MHz,  $\text{CDCl}_3$ )  $\delta$  148.3, 144.0, 136.3, 134.9, 130.8, 128.8, 127.7, 126.2 (q,  $J$  = 276.2 Hz), 126.1, 125.9, 123.2, 122.8, 120.0, 109.1, 43.7, 37.5 (q,  $J$  = 27.8 Hz), 33.4 (q,  $J$  = 2.9 Hz).  $^{19}\text{F}$  NMR (376 MHz,  $\text{CDCl}_3$ )  $\delta$  -63.54 (t,  $J$  = 10.6 Hz, 3F). HRMS (ESI-TOF) Calcd for  $\text{C}_{17}\text{H}_{14}\text{F}_3\text{N}_2^+$  ( $[\text{M}+\text{H}]^+$ ) 303.1104. Found 303.1105.

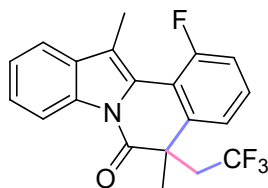

1-Fluoro-5,12-dimethyl-5-(2,2,2-trifluoroethyl)indolo[2,1-*a*]isoquinolin-6(5*H*)-one (**3m**), isolated by flash column chromatography (petroleum ether/EtOAc = 20:1, v/v) in 69% yield (75.0 mg), white solid: mp 96 – 97 °C.  $R_f$  (petroleum ether/EtOAc = 5:1, v/v) 0.33.  $^1\text{H}$  NMR (400 MHz,  $\text{CDCl}_3$ )  $\delta$  8.51 – 8.48 (m, 1H), 7.63 – 7.61 (m, 1H), 7.45 – 7.35 (m, 3H), 7.26 – 7.24 (m, 1H), 7.17 – 7.12 (m, 1H), 3.29 – 3.17 (m, 1H), 2.82 – 2.71 (m, 1H), 2.51 (d,  $J$  = 10.0 Hz, 3H), 1.72 (s, 3H).  $^{13}\text{C}\{^1\text{H}\}$  NMR (101 MHz,  $\text{CDCl}_3$ )  $\delta$  169.6, 159.2, 156.7, 138.1 (d,  $J$  = 3.2 Hz), 135.1, 132.8, 129.3 (d,  $J$  = 9.1

Hz), 126.4, 125.1 (q,  $J = 277.3$  Hz), 124.5, 122.0 (d,  $J = 3.1$  Hz), 119.1, 118.8 (d,  $J = 1.8$  Hz), 116.3, 115.5 (d,  $J = 23.6$  Hz), 114.9 (d,  $J = 15.5$  Hz), 45.5 (p,  $J = 2.2$  Hz), 43.5 (q,  $J = 27.7$  Hz), 28.2, 11.7 (d,  $J = 21.3$  Hz).  $^{19}\text{F}$  NMR (376 MHz,  $\text{CDCl}_3$ )  $\delta$  -60.33 (t,  $J = 10.3$  Hz, 3F), -105.40 – -105.52 (m, 1F). HRMS (ESI-TOF) Calcd for  $\text{C}_{20}\text{H}_{16}\text{F}_4\text{NO}^+$  ( $[\text{M}+\text{H}]^+$ ) 362.1163. Found 362.1175.

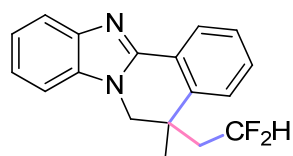

5-(2,2-Difluoroethyl)-5-methyl-5,6-dihydrobenzo[4,5]imidazo[2,1-*a*]isoquinoline (**3n1**), isolated by flash column chromatography (petroleum ether/EtOAc = 20:1, v/v) in 83% yield (74.2 mg), brown oil.  $R_f$  (petroleum ether/EtOAc = 5:1, v/v) 0.33.  $^1\text{H}$  NMR (400 MHz,  $\text{CDCl}_3$ )  $\delta$  8.39 – 8.36 (m, 1H), 7.86 – 7.82 (m, 1H), 7.52 – 7.43 (m, 3H), 7.39 – 7.35 (m, 1H), 7.33 – 7.29 (m, 2H), 5.75 – 5.45 (m, 1H), 4.29 (d,  $J = 12.7$  Hz, 1H), 4.02 – 3.98 (m, 1H), 2.15 – 2.05 (m, 2H), 1.66 (s, 3H).  $^{13}\text{C}\{^1\text{H}\}$  NMR (101 MHz,  $\text{CDCl}_3$ )  $\delta$  148.3, 143.9, 139.9, 134.7, 130.8, 128.3, 126.5, 125.5, 124.9, 123.0, 122.8, 119.9, 115.9 (t,  $J = 238.1$  Hz), 109.0, 50.8, 42.6 (t,  $J = 20.8$  Hz), 36.2 (t,  $J = 4.5$  Hz), 23.5.  $^{19}\text{F}$  NMR (376 MHz,  $\text{CDCl}_3$ )  $\delta$  -112.01 – -112.27 (m, 2F). HRMS (ESI-TOF) Calcd for  $\text{C}_{18}\text{H}_{17}\text{F}_2\text{N}_2^+$  ( $[\text{M}+\text{H}]^+$ ) 299.1354. Found 299.1352.

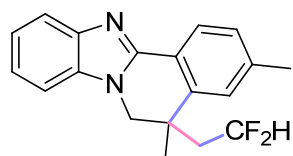

5-(2,2-Difluoroethyl)-3,5-dimethyl-5,6-dihydrobenzo[4,5]imidazo[2,1-*a*]isoquinoline (**3n2**), isolated by flash column chromatography (petroleum ether/EtOAc = 20:1, v/v) in 68% yield (63.8 mg), colorless oil.  $R_f$  (petroleum ether/EtOAc = 5:1, v/v) 0.33.  $^1\text{H}$  NMR (400 MHz,  $\text{CDCl}_3$ )  $\delta$  8.26 (d,  $J = 7.9$  Hz, 1H), 7.85 – 7.81 (m, 1H), 7.38 – 7.34 (m, 1H), 7.32 – 7.28 (m, 3H), 7.24 (d,  $J = 1.5$  Hz, 1H), 5.76 – 5.46 (m, 1H), 4.28 (d,  $J = 12.7$  Hz, 1H), 3.99 – 3.96 (m, 1H), 2.45 (s, 3H), 2.14 – 2.04 (m, 2H), 1.64 (s, 3H).  $^{13}\text{C}\{^1\text{H}\}$  NMR (101 MHz,  $\text{CDCl}_3$ )  $\delta$  148.6, 143.9, 141.1, 139.9, 134.7, 129.1, 126.5, 125.5, 122.80, 122.78, 122.7, 119.7, 115.9 (t,  $J = 238.0$  Hz), 108.9, 50.8, 42.6 (t,  $J = 20.8$  Hz), 36.1 (q,  $J = 1.2$  Hz), 23.5, 22.0.  $^{19}\text{F}$  NMR (376 MHz,  $\text{CDCl}_3$ )  $\delta$  -111.98 – -112.25 (m, 2F). HRMS (ESI-TOF) Calcd for  $\text{C}_{19}\text{H}_{19}\text{F}_2\text{N}_2^+$  ( $[\text{M}+\text{H}]^+$ ) 313.1511. Found 313.1500.

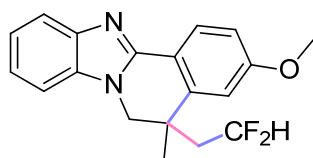

5-(2,2-Difluoroethyl)-3-methoxy-5-methyl-5,6-dihydrobenzo[4,5]imidazo[2,1-*a*]isoquinoline (**3n3**), isolated by flash column chromatography (petroleum ether/EtOAc = 20:1, v/v) in 84% yield (82.8 mg), white solid: mp 97 – 98 °C.  $R_f$  (petroleum ether/EtOAc = 5:1, v/v) 0.33.  $^1\text{H}$  NMR (400 MHz,  $\text{CDCl}_3$ )  $\delta$  8.31 (d,  $J$  = 8.5 Hz, 1H), 7.83 – 7.78 (m, 1H), 7.36 – 7.26 (m, 3H), 7.01 – 6.95 (m, 2H), 5.77 – 5.46 (m, 1H), 4.25 (d,  $J$  = 12.7 Hz, 1H), 3.96 – 3.93 (m, 1H), 3.90 (s, 3H), 2.13 – 2.03 (m, 2H), 1.63 (s, 3H).  $^{13}\text{C}\{^1\text{H}\}$  NMR (101 MHz,  $\text{CDCl}_3$ )  $\delta$  161.6, 148.6, 143.9, 141.9, 134.7, 128.3, 122.6, 119.5, 118.3, 115.9 (t,  $J$  = 238.0 Hz), 112.7, 111.7, 108.8, 55.5, 50.8, 42.4 (t,  $J$  = 20.7 Hz), 36.3 (t,  $J$  = 4.0 Hz), 23.4.  $^{19}\text{F}$  NMR (376 MHz,  $\text{CDCl}_3$ )  $\delta$  -112.00 – -112.26 (m, 2F). HRMS (ESI-TOF) Calcd for  $\text{C}_{19}\text{H}_{19}\text{F}_2\text{N}_2\text{O}^+$  ( $[\text{M}+\text{H}]^+$ ) 329.1460. Found 329.1463.

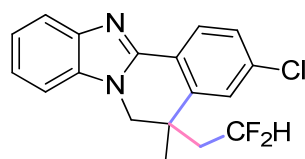

3-Chloro-5-(2,2-difluoroethyl)-5-methyl-5,6-dihydrobenzo[4,5]imidazo[2,1-*a*]isoquinoline (**3n4**), isolated by flash column chromatography (petroleum ether/EtOAc = 20:1, v/v) in 75% yield (75.0 mg), pale yellow solid: mp 101 – 102 °C.  $R_f$  (petroleum ether/EtOAc = 5:1, v/v) 0.33.  $^1\text{H}$  NMR (400 MHz,  $\text{CDCl}_3$ )  $\delta$  8.30 (d,  $J$  = 8.3 Hz, 1H), 7.86 – 7.81 (m, 1H), 7.46 (dd,  $J$  = 8.3, 2.0 Hz, 1H), 7.42 (d,  $J$  = 2.0 Hz, 1H), 7.39 – 7.29 (m, 3H), 5.81 – 5.51 (m, 1H), 4.32 (d,  $J$  = 12.8 Hz, 1H), 4.01 – 3.97 (m, 1H), 2.15 – 2.04 (m, 2H), 1.66 (s, 3H).  $^{13}\text{C}\{^1\text{H}\}$  NMR (101 MHz,  $\text{CDCl}_3$ )  $\delta$  147.5, 143.9, 141.9, 136.8, 134.7, 128.7, 127.8, 125.4, 124.1, 123.3, 123.0, 120.0, 115.6 (t,  $J$  = 238.4 Hz), 109.1, 50.5, 42.4 (t,  $J$  = 20.8 Hz), 36.4 (t,  $J$  = 4.7 Hz), 23.3.  $^{19}\text{F}$  NMR (376 MHz,  $\text{CDCl}_3$ )  $\delta$  -112.09 – -112.34 (m, 2F). HRMS (ESI-TOF) Calcd for  $\text{C}_{18}\text{H}_{16}\text{ClF}_2\text{N}_2^+$  ( $[\text{M}+\text{H}]^+$ ) 333.0965. Found 333.0979.

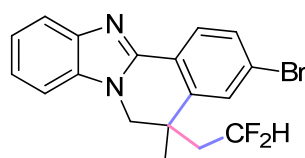

3-Bromo-5-(2,2-difluoroethyl)-5-methyl-5,6-dihydrobenzo[4,5]imidazo[2,1-*a*]isoquinoline (**3n5**), isolated by flash column chromatography (petroleum ether/EtOAc = 20:1,

v/v) in 89% yield (100.7 mg), pale yellow solid: mp 131 – 132 °C.  $R_f$  (petroleum ether/EtOAc = 5:1, v/v) 0.33.  $^1\text{H}$  NMR (400 MHz,  $\text{CDCl}_3$ )  $\delta$  8.30 (d,  $J = 8.3$  Hz, 1H), 7.88 – 7.85 (m, 1H), 7.63 (dd,  $J = 8.3, 1.9$  Hz, 1H), 7.59 (d,  $J = 1.8$  Hz, 1H), 7.41 – 7.32 (m, 3H), 5.84 – 5.54 (m, 1H), 4.36 (d,  $J = 12.9$  Hz, 1H), 4.03 – 3.99 (m, 1H), 2.16 – 2.05 (m, 2H), 1.67 (s, 3H).  $^{13}\text{C}\{^1\text{H}\}$  NMR (101 MHz,  $\text{CDCl}_3$ )  $\delta$  147.1, 142.1, 134.2, 131.8, 128.31, 128.27, 125.7, 123.7, 123.5, 119.6, 115.5 (t,  $J = 238.5$  Hz), 109.3, 50.4, 42.4 (t,  $J = 21.1$  Hz), 36.4 (t,  $J = 4.5$  Hz), 23.3.  $^{19}\text{F}$  NMR (376 MHz,  $\text{CDCl}_3$ )  $\delta$  -112.17 – -112.41 (m, 2F). HRMS (ESI-TOF) Calcd for  $\text{C}_{18}\text{H}_{16}\text{BrF}_2\text{N}_2^+$  ( $[\text{M}+\text{H}]^+$ ) 377.0459. Found 377.0463.

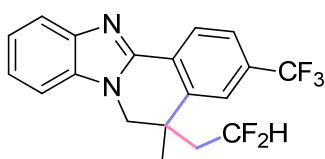

5-(2,2-Difluoroethyl)-5-methyl-3-(trifluoromethyl)-5,6-dihydrobenzo[4,5]imidazo[2,1-a]isoquinoline (**301**), isolated by flash column chromatography (petroleum ether/EtOAc = 20:1, v/v) in 88% yield (96.2 mg), white solid: mp 97 – 98 °C.  $R_f$  (petroleum ether/EtOAc = 5:1, v/v) 0.33.  $^1\text{H}$  NMR (400 MHz,  $\text{CDCl}_3$ )  $\delta$  8.48 (d,  $J = 8.1$  Hz, 1H), 7.89 – 7.84 (m, 1H), 7.75 – 7.73 (m, 1H), 7.67 (d,  $J = 1.6$  Hz, 1H), 7.43 – 7.32 (m, 3H), 5.82 – 5.52 (m, 1H), 4.38 (d,  $J = 12.8$  Hz, 1H), 4.06 – 4.02 (m, 1H), 2.22 – 2.03 (m, 2H), 1.71 (s, 3H).  $^{13}\text{C}\{^1\text{H}\}$  NMR (101 MHz,  $\text{CDCl}_3$ )  $\delta$  146.9, 143.9, 140.9, 134.7, 132.3 (q,  $J = 32.4$  Hz), 128.8 (q,  $J = 0.4$  Hz), 126.8, 125.3 (q,  $J = 3.9$  Hz), 125.1, 123.753 (q,  $J = 270.9$  Hz), 123.752, 123.2, 122.0 (q,  $J = 3.9$  Hz), 120.3, 115.5 (t,  $J = 238.5$  Hz), 109.3, 50.4, 42.4 (t,  $J = 20.8$  Hz), 36.5 (t,  $J = 4.6$  Hz), 23.3.  $^{19}\text{F}$  NMR (376 MHz,  $\text{CDCl}_3$ )  $\delta$  -62.75 (s, 3F), -112.22 – -112.46 (m, 2F). HRMS (ESI-TOF) Calcd for  $\text{C}_{19}\text{H}_{16}\text{F}_5\text{N}_2^+$  ( $[\text{M}+\text{H}]^+$ ) 367.1228. Found 367.1230.

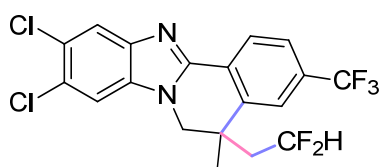

9,10-Dichloro-5-(2,2-difluoroethyl)-5-methyl-3-(trifluoromethyl)-5,6-dihydrobenzo[4,5]imidazo[2,1-a]isoquinoline (**302**), isolated by flash column chromatography (petroleum ether/EtOAc = 20:1, v/v) in 85% yield (110.5 mg), white solid: mp 223 – 224 °C.  $R_f$  (petroleum ether/EtOAc = 5:1, v/v) 0.33.  $^1\text{H}$  NMR (400 MHz,  $\text{DMSO}-d_6$ )  $\delta$  8.34 (d,  $J = 8.0$  Hz, 1H), 8.03 (d,  $J = 9.5$  Hz, 2H), 7.92 (d,  $J = 1.6$  Hz, 1H), 7.85 (dd,  $J$

= 8.1, 1.6 Hz, 1H), 6.29 – 5.99 (m, 1H), 4.62 (d,  $J = 13.2$  Hz, 1H), 4.22 (d,  $J = 13.1$  Hz, 1H), 2.26 – 2.16 (m, 2H), 1.60 (s, 3H).  $^{13}\text{C}\{^1\text{H}\}$  NMR (101 MHz, DMSO- $d_6$ )  $\delta$  149.4, 143.3, 142.9, 134.8, 131.4 (q,  $J = 31.7$  Hz), 128.5 (d,  $J = 0.8$  Hz), 126.9, 126.0, 125.5, 125.3 (q,  $J = 3.8$  Hz), 124.4 (q,  $J = 271.1$  Hz), 123.3 (q,  $J = 3.7$  Hz), 120.9, 116.6 (t,  $J = 235.9$  Hz), 112.8, 49.8, 42.5 (t,  $J = 20.7$  Hz), 36.5 (t,  $J = 5.2$  Hz), 23.4.  $^{19}\text{F}$  NMR (376 MHz, DMSO- $d_6$ )  $\delta$  -61.19 (s, 3F), -110.63 – -110.91 (m, 2F). HRMS (ESI-TOF) Calcd for  $\text{C}_{19}\text{H}_{14}\text{Cl}_2\text{F}_5\text{N}_2^+$  ( $[\text{M}+\text{H}]^+$ ) 435.0449. Found 435.0445.

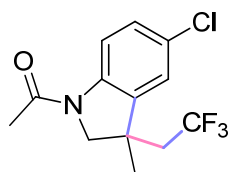

1-(5-Chloro-3-methyl-3-(2,2,2-trifluoroethyl)indolin-1-yl)ethanone (**5a1**),<sup>[6]</sup> isolated by flash column chromatography (petroleum ether/EtOAc = 20:1, v/v) in 77% yield (67.5 mg), pale yellow oil.  $R_f$  (petroleum ether/EtOAc = 5:1, v/v) 0.33.  $^1\text{H}$  NMR (400 MHz,  $\text{CDCl}_3$ )  $\delta$  8.15 (d,  $J = 8.7$  Hz, 1H), 7.22 (dd,  $J = 8.7, 2.2$  Hz, 1H), 7.08 (d,  $J = 2.2$  Hz, 1H), 4.13 (d,  $J = 10.7$  Hz, 1H), 3.84 (d,  $J = 10.8$  Hz, 1H), 2.59 – 2.39 (m, 2H), 2.24 (s, 3H), 1.47 (s, 3H).  $^{13}\text{C}\{^1\text{H}\}$  NMR (101 MHz,  $\text{CDCl}_3$ )  $\delta$  168.6, 140.0, 139.3, 128.9, 128.7, 126.0 (q,  $J = 276.8$  Hz), 122.4, 118.3, 61.1 (d,  $J = 1.9$  Hz), 43.1 (q,  $J = 26.8$  Hz), 41.1, 26.1, 24.1.  $^{19}\text{F}$  NMR (376 MHz,  $\text{CDCl}_3$ )  $\delta$  -60.44 (t,  $J = 10.6$  Hz, 3F). HRMS (ESI-TOF) Calcd for  $\text{C}_{13}\text{H}_{14}\text{ClF}_3\text{NO}^+$  ( $[\text{M}+\text{H}]^+$ ) 292.0711. Found 292.0712.

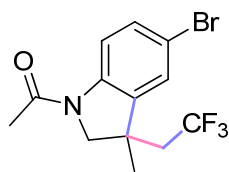

1-(5-Bromo-3-methyl-3-(2,2,2-trifluoroethyl)indolin-1-yl)ethanone (**5a2**),<sup>[6]</sup> isolated by flash column chromatography (petroleum ether/EtOAc = 20:1, v/v) in 82% yield (82.7 mg), colorless oil.  $R_f$  (petroleum ether/EtOAc = 5:1, v/v) 0.33.  $^1\text{H}$  NMR (400 MHz,  $\text{CDCl}_3$ )  $\delta$  8.10 (d,  $J = 8.6$  Hz, 1H), 7.36 (dd,  $J = 8.6, 2.1$  Hz, 1H), 7.23 (d,  $J = 2.0$  Hz, 1H), 4.13 (d,  $J = 10.8$  Hz, 1H), 3.83 (d,  $J = 10.8$  Hz, 1H), 2.57 – 2.42 (m, 2H), 2.24 (s, 3H), 1.47 (s, 3H).  $^{13}\text{C}\{^1\text{H}\}$  NMR (101 MHz,  $\text{CDCl}_3$ )  $\delta$  168.7, 140.4, 139.6, 131.6, 126.0 (q,  $J = 276.7$  Hz), 125.3, 118.7, 116.3, 61.0 (q,  $J = 2.4$  Hz), 43.1 (q,  $J = 27.0$  Hz), 41.1 (d,  $J = 1.4$  Hz), 26.1 (d,  $J = 0.8$  Hz), 24.1.  $^{19}\text{F}$  NMR (376 MHz,  $\text{CDCl}_3$ )

[6] J. Wang, K. Sun, X. Chen, T. Chen, Y. Liu, L. Qu, Y. Zhao and B. Yu, *Org. Lett.*, 2019, **21**, 1863–1867.

$\delta$  -65.18 (t,  $J$  = 10.4 Hz, 3F). HRMS (ESI-TOF) Calcd for  $C_{13}H_{14}BrF_3NO^+$  ( $[M+H]^+$ ) 336.0205. Found 336.0203.

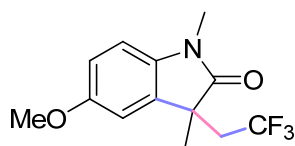

5-Methoxy-1,3-dimethyl-3-(2,2,2-trifluoroethyl)indolin-2-one (**5b**),<sup>[7]</sup> isolated by flash column chromatography (petroleum ether/EtOAc = 20:1, v/v) in 91% yield (74.7 mg), white solid: mp 105 – 106 °C.  $R_f$  (petroleum ether/EtOAc = 5:1, v/v) 0.33.  $^1H$  NMR (400 MHz,  $CDCl_3$ )  $\delta$  6.88 (d,  $J$  = 2.4 Hz, 1H), 6.84 (dd,  $J$  = 8.4, 2.5 Hz, 1H), 6.78 (d,  $J$  = 8.4 Hz, 1H), 3.80 (s, 3H), 3.21 (s, 3H), 2.87 – 2.75 (m, 1H), 2.68 – 2.57 (m, 1H), 1.40 (s, 3H).  $^{13}C\{^1H\}$  NMR (101 MHz,  $CDCl_3$ )  $\delta$  178.1, 156.1, 136.4, 132.4, 125.2 (q,  $J$  = 276.5 Hz), 112.6, 111.3 (q,  $J$  = 1.6 Hz), 108.7, 55.8, 44.8 (q,  $J$  = 2.2 Hz), 40.6 (q,  $J$  = 28.2 Hz), 26.5, 25.0.  $^{19}F$  NMR (376 MHz,  $CDCl_3$ )  $\delta$  -61.87 (t,  $J$  = 10.4 Hz, 3F). HRMS (ESI-TOF) Calcd for  $C_{13}H_{15}F_3NO_2^+$  ( $[M+H]^+$ ) 274.1049. Found 274.1036.

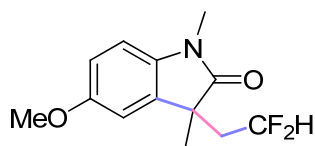

3-(2,2-Difluoroethyl)-5-methoxy-1,3-dimethylindolin-2-one (**5c**),<sup>[8]</sup> isolated by flash column chromatography (petroleum ether/EtOAc = 20:1, v/v) in 89% yield (68.5 mg), pale yellow oil.  $R_f$  (petroleum ether/EtOAc = 5:1, v/v) 0.33.  $^1H$  NMR (400 MHz,  $CDCl_3$ )  $\delta$  6.84 – 6.81 (m, 2H), 6.79 – 6.76 (m, 1H), 5.77 – 5.46 (m, 1H), 3.81 (s, 3H), 3.20 (s, 3H), 2.55 – 2.43 (m, 1H), 2.32 – 2.19 (m, 1H), 1.40 (s, 3H).  $^{13}C\{^1H\}$  NMR (101 MHz,  $CDCl_3$ )  $\delta$  178.8, 156.2, 136.4, 133.5, 115.1 (t,  $J$  = 238.3 Hz), 112.4, 110.6, 108.7, 55.8, 45.0 (q,  $J$  = 0.9 Hz), 41.4 (t,  $J$  = 21.8 Hz), 26.4, 24.4.  $^{19}F$  NMR (376 MHz,  $CDCl_3$ )  $\delta$  -114.08 – -114.36 (m, 2F). HRMS (ESI-TOF) Calcd for  $C_{13}H_{16}F_2NO_2^+$  ( $[M+H]^+$ ) 256.1144. Found 256.1145.

[7] W. Fu, F. Xu, Y. Fu, C. Xu, S. Li and D. Zou, *Eur. J. Org. Chem.*, 2013, **2014**, 709–712.

[8] H. Sun, Y. Jiang, Y.-S. Yang, Y.-Y. Li, L. Li, W.-X. Wang, T. Feng, Z.-H. Li and J.-K. Liu, *Org. Biomol. Chem.*, 2019, **17**, 6629–6638.

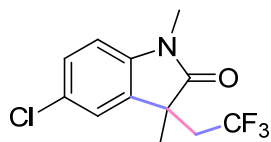

5-Chloro-1,3-dimethyl-3-(2,2,2-trifluoroethyl)indolin-2-one (**5d1**),<sup>[9]</sup> isolated by flash column chromatography (petroleum ether/EtOAc = 20:1, v/v) in 68% yield (56.9 mg), white solid: mp 74 – 75 °C. *R<sub>f</sub>* (petroleum ether/EtOAc = 5:1, v/v) 0.33. <sup>1</sup>H NMR (400 MHz, CDCl<sub>3</sub>) δ 7.29 (dd, *J* = 8.3, 2.1 Hz, 1H), 7.24 (d, *J* = 2.1 Hz, 1H), 6.81 (d, *J* = 8.3 Hz, 1H), 3.23 (s, 3H), 2.89 – 2.77 (m, 1H), 2.69 – 2.57 (m, 1H), 1.41 (s, 3H). <sup>13</sup>C{<sup>1</sup>H} NMR (101 MHz, CDCl<sub>3</sub>) δ 177.9, 141.4, 132.7, 128.5, 128.1, 125.1 (q, *J* = 278.1 Hz), 124.1 (q, *J* = 1.6 Hz), 109.4, 44.6 (q, *J* = 2.1 Hz), 41.6 (q, *J* = 28.5 Hz), 26.6, 24.9. <sup>19</sup>F NMR (376 MHz, CDCl<sub>3</sub>) δ -61.97 (t, *J* = 10.4 Hz, 3F). HRMS (ESI-TOF) Calcd for C<sub>12</sub>H<sub>12</sub>ClF<sub>3</sub>NO<sup>+</sup> ([M+H]<sup>+</sup>) 278.0554. Found 278.0557.

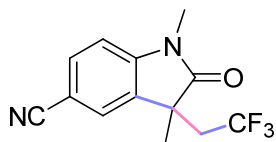

1,3-Dimethyl-2-oxo-3-(2,2,2-trifluoroethyl)indoline-5-carbonitrile (**5d2**),<sup>[10]</sup> isolated by flash column chromatography (petroleum ether/EtOAc = 20:1, v/v) in 72% yield (57.9 mg), white solid: mp 105 – 106 °C. *R<sub>f</sub>* (petroleum ether/EtOAc = 5:1, v/v) 0.33. <sup>1</sup>H NMR (400 MHz, CDCl<sub>3</sub>) δ 7.66 (dd, *J* = 8.2, 1.6 Hz, 1H), 7.53 (d, *J* = 1.5 Hz, 1H), 6.97 (d, *J* = 8.1 Hz, 1H), 3.28 (s, 3H), 2.93 – 2.81 (m, 1H), 2.74 – 2.63 (m, 1H), 1.44 (s, 3H). <sup>13</sup>C{<sup>1</sup>H} NMR (101 MHz, CDCl<sub>3</sub>) δ 178.1, 146.7, 133.9, 132.0, 127.0 (q, *J* = 1.6 Hz), 124.9 (q, *J* = 276.3 Hz), 119.0, 109.0, 106.0, 44.2 (q, *J* = 2.3 Hz), 40.5 (q, *J* = 28.4 Hz), 26.7, 24.9. <sup>19</sup>F NMR (376 MHz, CDCl<sub>3</sub>) δ -62.04 (t, *J* = 10.4 Hz, 3F). HRMS (ESI-TOF) Calcd for C<sub>13</sub>H<sub>12</sub>F<sub>3</sub>N<sub>2</sub>O<sup>+</sup> ([M+H]<sup>+</sup>) 269.0896. Found 269.0899.

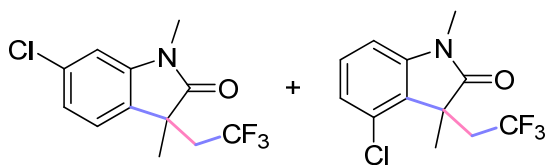

6-Chloro-1,3-dimethyl-3-(2,2,2-trifluoroethyl)indolin-2-one and 4-chloro-1,3-dimethyl-3-(2,2,2-trifluoroethyl)indolin-2-one (**5e**),<sup>[9]</sup> isolated by flash column chromatography (petroleum ether/EtOAc = 20:1, v/v) in 65% yield (54.0 mg), 1:1 mixture of regioisomers, colorless oil. *R<sub>f</sub>* (petroleum ether/EtOAc = 5:1, v/v) 0.33.

[9] L. Li, M. Deng, S.-C. Zheng, Y.-P. Xiong, B. Tan and X.-Y. Liu, *Org. Lett.*, 2013, **16**, 504–507.

$^1\text{H}$  NMR (400 MHz,  $\text{CDCl}_3$ )  $\delta$  7.28 – 7.24 (m, 1H), 7.17 (d,  $J = 7.9$  Hz, 1H), 7.07 (dd,  $J = 7.9, 1.9$  Hz, 1H), 7.02 (dd,  $J = 8.2, 0.9$  Hz, 1H), 6.89 (d,  $J = 1.8$  Hz, 1H), 6.79 (dd,  $J = 7.8, 0.8$  Hz, 1H), 3.23 (s, 3H), 3.22 (s, 3H), 3.18 – 3.10 (m, 1H), 2.93 – 2.76 (m, 2H), 2.69 – 2.57 (m, 1H), 1.53 (s, 3H), 1.39 (s, 3H).  $^{13}\text{C}\{^1\text{H}\}$  NMR (101 MHz,  $\text{CDCl}_3$ )  $\delta$  178.4, 177.8, 144.6, 144.1, 134.4, 131.2, 129.8, 129.3, 127.2, 125.1 (q,  $J = 276.4$  Hz), 125.0 (q,  $J = 276.4$  Hz), 124.5 (q,  $J = 1.5$  Hz), 123.6, 122.5, 109.3, 107.0, 45.4 (q,  $J = 2.3$  Hz), 44.1 (q,  $J = 2.2$  Hz), 40.6 (q,  $J = 28.2$  Hz), 38.7 (q,  $J = 28.2$  Hz), 26.7, 26.5, 24.9, 22.2.  $^{19}\text{F}$  NMR (376 MHz,  $\text{CDCl}_3$ )  $\delta$  -64.00 (t,  $J = 10.2$  Hz, 3F), -61.96 (t,  $J = 10.3$  Hz, 3F). HRMS (ESI-TOF) Calcd for  $\text{C}_{12}\text{H}_{12}\text{ClF}_3\text{NO}^+$  ( $[\text{M}+\text{H}]^+$ ) 278.0554. Found 278.0551.

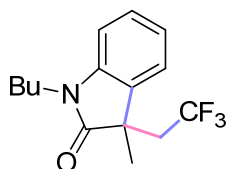

1-Butyl-3-methyl-3-(2,2,2-trifluoroethyl)indolin-2-one (**7a**),<sup>[7]</sup> isolated by flash column chromatography (petroleum ether/EtOAc = 20:1, v/v) in 56% yield (47.9 mg), colorless oil.  $R_f$  (petroleum ether/EtOAc = 5:1, v/v) 0.33.  $^1\text{H}$  NMR (400 MHz,  $\text{CDCl}_3$ )  $\delta$  7.32 – 7.25 (m, 2H), 7.09 – 7.05 (m, 1H), 6.90 (d,  $J = 7.8$  Hz, 1H), 3.85 – 3.75 (m, 1H), 3.71 – 3.62 (m, 1H), 2.94 – 2.81 (m, 1H), 2.74 – 2.59 (m, 1H), 1.69 – 1.61 (m, 2H), 1.44 – 1.34 (m, 5H), 0.95 (t,  $J = 7.3$  Hz, 3H).  $^{13}\text{C}\{^1\text{H}\}$  NMR (101 MHz,  $\text{CDCl}_3$ )  $\delta$  178.3, 142.3, 131.1, 128.4, 125.3 (q,  $J = 276.6$  Hz), 123.7 (d,  $J = 1.3$  Hz), 122.3, 108.7, 44.3 (q,  $J = 2.2$  Hz), 40.6 (q,  $J = 28.1$  Hz), 39.9, 29.3, 25.3, 20.1, 13.8.  $^{19}\text{F}$  NMR (376 MHz,  $\text{CDCl}_3$ )  $\delta$  -61.89 (t,  $J = 10.6$  Hz, 3F). HRMS (ESI-TOF) Calcd for  $\text{C}_{15}\text{H}_{19}\text{F}_3\text{NO}^+$  ( $[\text{M}+\text{H}]^+$ ) 286.1413. Found 286.1415.

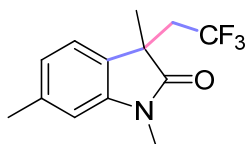

1,3,6-Trimethyl-3-(2,2,2-trifluoroethyl)indolin-2-one (**7b**),<sup>[9]</sup> isolated by flash column chromatography (petroleum ether/EtOAc = 20:1, v/v) in 60% yield (47.1 mg), yellowish oil.  $R_f$  (petroleum ether/EtOAc = 5:1, v/v) 0.33.  $^1\text{H}$  NMR (400 MHz,  $\text{CDCl}_3$ )  $\delta$  7.14 (d,  $J = 7.5$  Hz, 1H), 6.91 – 6.89 (m, 1H), 6.71 (dd,  $J = 0.9, 0.8$  Hz, 1H), 3.22 (s, 3H), 2.86 – 2.74 (m, 1H), 2.69 – 2.55 (m, 1H), 2.40 (s, 3H), 1.39 (s, 3H).  $^{13}\text{C}\{^1\text{H}\}$  NMR (101 MHz,  $\text{CDCl}_3$ )  $\delta$  178.8, 142.9, 138.7, 128.1, 125.3 (q,  $J = 276.3$  Hz), 123.3



(q,  $J = 1.4$  Hz), 123.2, 109.4, 44.2 (q,  $J = 2.3$  Hz), 40.7 (q,  $J = 28.0$  Hz), 26.4, 25.1, 21.8.  $^{19}\text{F}$  NMR (376 MHz,  $\text{CDCl}_3$ )  $\delta$  -61.93 (t,  $J = 10.9$  Hz, 3F). HRMS (ESI-TOF) Calcd for  $\text{C}_{13}\text{H}_{15}\text{F}_3\text{NO}^+$  ( $[\text{M}+\text{H}]^+$ ) 258.1100. Found 258.1096.

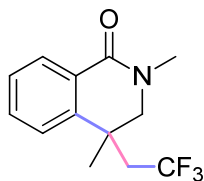

2,4-Dimethyl-4-(2,2,2-trifluoroethyl)-3,4-dihydroisoquinolin-1(2H)-one (**9a**),<sup>[6]</sup> isolated by flash column chromatography (petroleum ether/EtOAc = 20:1, v/v) in 62% yield (47.7 mg), colorless oil.  $R_f$  (petroleum ether/EtOAc = 5:1, v/v) 0.33.  $^1\text{H}$  NMR (400 MHz,  $\text{CDCl}_3$ )  $\delta$  8.13 (dd,  $J = 7.8, 1.5$  Hz, 1H), 7.50 (ddd,  $J = 1.52, 6.1, 7.6$  Hz, 1H), 7.39 (ddd,  $J = 1.2, 6.3, 7.5$  Hz, 1H), 7.30 (d,  $J = 7.8$  Hz, 1H), 3.55 (d,  $J = 12.9$  Hz, 1H), 3.40 (d,  $J = 13.0$  Hz, 1H), 3.18 (s, 3H), 2.58 – 2.46 (m, 1H), 2.39 – 2.27 (m, 1H), 1.55 (s, 3H).  $^{13}\text{C}\{^1\text{H}\}$  NMR (101 MHz,  $\text{CDCl}_3$ )  $\delta$  164.4, 144.2, 132.3, 128.9, 128.0, 127.7, 126.1 (q,  $J = 277.0$  Hz), 123.7, 57.2 (q,  $J = 1.7$  Hz), 41.33 (q,  $J = 27.1$  Hz), 35.2 (q,  $J = 1.8$  Hz), 35.1, 22.1 (q,  $J = 1.9$  Hz).  $^{19}\text{F}$  NMR (376 MHz,  $\text{CDCl}_3$ )  $\delta$  -59.99 (t,  $J = 11.2$  Hz, 3F). HRMS (ESI-TOF) Calcd for  $\text{C}_{13}\text{H}_{15}\text{F}_3\text{NO}^+$  ( $[\text{M}+\text{H}]^+$ ) 258.1100. Found 258.1101.

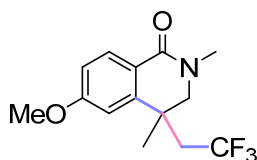

6-Methoxy-2,4-dimethyl-4-(2,2,2-trifluoroethyl)-3,4-dihydroisoquinolin-1(2H)-one (**9b**), isolated by flash column chromatography (petroleum ether/EtOAc = 20:1, v/v) in 64% yield (54.8 mg), white solid: mp 73 – 74 °C.  $R_f$  (petroleum ether/EtOAc = 5:1, v/v) 0.33.  $^1\text{H}$  NMR (400 MHz,  $\text{CDCl}_3$ )  $\delta$  8.09 (d,  $J = 8.7$  Hz, 1H), 6.88 (dd,  $J = 8.7, 2.5$  Hz, 1H), 6.78 (d,  $J = 2.4$  Hz, 1H), 3.86 (s, 3H), 3.52 (d,  $J = 12.9$  Hz, 1H), 3.37 (d,  $J = 13.0$  Hz, 1H), 3.15 (s, 3H), 2.58 – 2.45 (m, 1H), 2.36 – 2.23 (m, 1H), 1.61 (s, 3H).  $^{13}\text{C}\{^1\text{H}\}$  NMR (101 MHz,  $\text{CDCl}_3$ )  $\delta$  164.4, 162.7, 146.4, 131.2, 126.1 (q,  $J = 277.1$  Hz), 120.9, 112.1, 110.0, 57.2, 55.5, 41.2 (q,  $J = 27.0$  Hz), 35.3 (q,  $J = 1.4$  Hz), 34.9, 22.1 (q,  $J = 1.5$  Hz).  $^{19}\text{F}$  NMR (376 MHz,  $\text{CDCl}_3$ )  $\delta$  -59.96 (t,  $J = 11.8$  Hz, 3F). HRMS (ESI-TOF) Calcd for  $\text{C}_{14}\text{H}_{17}\text{F}_3\text{NO}_2^+$  ( $[\text{M}+\text{H}]^+$ ) 288.1206. Found 288.1215.

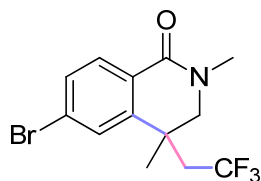

6-Bromo-2,4-dimethyl-4-(2,2,2-trifluoroethyl)-3,4-dihydroisoquinolin-1(2H)-one (**9c**),<sup>[6]</sup> isolated by flash column chromatography (petroleum ether/EtOAc = 20:1, v/v) in 75% yield (75.3 mg), white solid: mp 56 – 57 °C.  $R_f$  (petroleum ether/EtOAc = 5:1, v/v) 0.33.  $^1\text{H}$  NMR (400 MHz,  $\text{CDCl}_3$ )  $\delta$  7.99 (d,  $J = 8.3$  Hz, 1H), 7.53 (dd,  $J = 8.3, 1.9$  Hz, 1H), 7.44 (d,  $J = 1.9$  Hz, 1H), 3.54 (d,  $J = 13.0$  Hz, 1H), 3.39 (d,  $J = 13.0$  Hz, 1H), 3.16 (s, 3H), 2.57 – 2.45 (m, 1H), 2.38 – 2.26 (m, 1H), 1.54 (d,  $J = 1.3$  Hz, 3H).  $^{13}\text{C}\{^1\text{H}\}$  NMR (101 MHz,  $\text{CDCl}_3$ )  $\delta$  163.6, 146.0, 131.1, 130.8, 127.2, 127.1, 127.0, 125.9 (q,  $J = 277.1$  Hz), 125.7, 57.0 (d,  $J = 2.0$  Hz), 41.2 (q,  $J = 27.1$  Hz), 35.3 (d,  $J = 1.7$  Hz), 35.1, 22.0 (d,  $J = 2.0$  Hz).  $^{19}\text{F}$  NMR (376 MHz,  $\text{CDCl}_3$ )  $\delta$  -59.97 (t,  $J = 11.8$  Hz, 3F). HRMS (ESI-TOF) Calcd for  $\text{C}_{13}\text{H}_{14}\text{BrF}_3\text{NO}^+$  ( $[\text{M}+\text{H}]^+$ ) 336.0205. Found 336.0203.

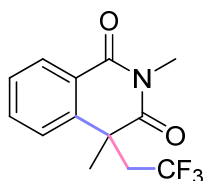

2,4-Dimethyl-4-(2,2,2-trifluoroethyl)isoquinoline-1,3(2H,4H)-dione (**9d**),<sup>[9]</sup> isolated by flash column chromatography (petroleum ether/EtOAc = 20:1, v/v) in 65% yield (56.6 mg), white solid: mp 66 – 67 °C.  $R_f$  (petroleum ether/EtOAc = 5:1, v/v) 0.33.  $^1\text{H}$  NMR (400 MHz,  $\text{CDCl}_3$ )  $\delta$  8.29 (ddd,  $J = 7.9, 1.5, 0.5$  Hz, 1H), 7.67 (ddd,  $J = 7.9, 7.3, 1.5$  Hz, 1H), 7.49 (ddd,  $J = 7.9, 7.3, 1.1$  Hz, 1H), 7.43 (d,  $J = 7.9$  Hz, 1H), 3.41 (s, 3H), 3.40 – 3.29 (m, 1H), 2.86 – 2.75 (m, 1H), 1.66 (s, 3H).  $^{13}\text{C}\{^1\text{H}\}$  NMR (101 MHz,  $\text{CDCl}_3$ )  $\delta$  174.6, 163.7, 140.4, 133.8, 129.3, 128.1, 125.6, 125.0 (q,  $J = 278.7$  Hz), 124.2, 44.4 (q,  $J = 27.6$  Hz), 43.6 (q,  $J = 2.3$  Hz), 31.2, 27.4.  $^{19}\text{F}$  NMR (376 MHz,  $\text{CDCl}_3$ )  $\delta$  -61.66 (t,  $J = 9.7$  Hz, 3F). HRMS (ESI-TOF) Calcd for  $\text{C}_{13}\text{H}_{13}\text{F}_3\text{NO}_2^+$  ( $[\text{M}+\text{H}]^+$ ) 272.0893. Found 272.0881.

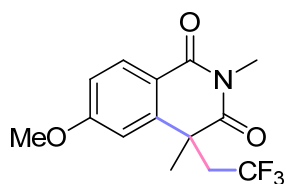

6-Methoxy-2,4-dimethyl-4-(2,2,2-trifluoroethyl)isoquinoline-1,3(2*H*,4*H*)-dione (**9e**),<sup>[9]</sup> isolated by flash column chromatography (petroleum ether/EtOAc = 20:1, v/v) in 65% yield (59.0 mg), yellowish solid: mp 113 – 114 °C. *R<sub>f</sub>* (petroleum ether/EtOAc = 5:1, v/v) 0.33. <sup>1</sup>H NMR (400 MHz, CDCl<sub>3</sub>) δ 8.24 (d, *J* = 8.8 Hz, 1H), 7.00 (dd, *J* = 8.9, 2.4 Hz, 1H), 6.85 (d, *J* = 2.4 Hz, 1H), 3.90 (s, 3H), 3.38 – 3.29 (m, 4H), 2.82 – 2.71 (m, 1H), 1.65 (s, 3H). <sup>13</sup>C{<sup>1</sup>H} NMR (101 MHz, CDCl<sub>3</sub>) δ 174.6, 164.0, 163.4, 142.6, 131.7, 125.0 (q, *J* = 277.1 Hz), 117.2, 113.6, 111.1, 55.6, 44.4 (q, *J* = 27.4 Hz), 43.7 (q, *J* = 2.3 Hz), 31.3, 27.3. <sup>19</sup>F NMR (376 MHz, CDCl<sub>3</sub>) δ -61.61 (t, *J* = 10.3 Hz, 3F). HRMS (ESI-TOF) Calcd for C<sub>14</sub>H<sub>15</sub>F<sub>3</sub>NO<sub>3</sub><sup>+</sup> ([M+H]<sup>+</sup>) 302.0999. Found 302.0996.

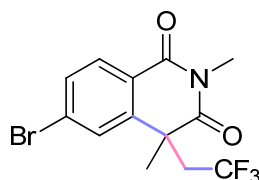

6-Bromo-2,4-dimethyl-4-(2,2,2-trifluoroethyl)isoquinoline-1,3(2*H*,4*H*)-dione (**9f**),<sup>[10]</sup> isolated by flash column chromatography (petroleum ether/EtOAc = 20:1, v/v) in 73% yield (76.6 mg), white solid: mp 137 – 138 °C. *R<sub>f</sub>* (petroleum ether/EtOAc = 5:1, v/v) 0.33. <sup>1</sup>H NMR (400 MHz, CDCl<sub>3</sub>) δ 8.15 (d, *J* = 8.5 Hz, 1H), 7.63 (dd, *J* = 6.7, 1.8 Hz, 1H), 7.57 (d, *J* = 1.8 Hz, 1H), 3.40 (s, 3H), 3.38 – 3.30 (m, 1H), 2.82 – 3.71 (m, 1H), 1.67 (s, 3H). <sup>13</sup>C{<sup>1</sup>H} NMR (101 MHz, CDCl<sub>3</sub>) δ 173.8, 163.0, 142.1, 131.7, 130.9, 129.1, 128.9, 124.8 (q, *J* = 277.0 Hz), 123.2, 44.4 (q, *J* = 27.6 Hz), 43.5 (q, *J* = 2.3 Hz), 31.0, 27.5. <sup>19</sup>F NMR (376 MHz, CDCl<sub>3</sub>) δ -61.68 (t, *J* = 10.0 Hz, 3F). HRMS (ESI-TOF) Calcd for C<sub>13</sub>H<sub>12</sub>BrF<sub>3</sub>NO<sub>2</sub><sup>+</sup> ([M+H]<sup>+</sup>) 349.9998. Found 349.9999.

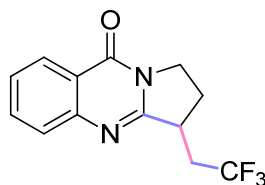

3-(2,2,2-Trifluoroethyl)-2,3-dihydropyrrolo[2,1-*b*]quinazolin-9(1*H*)-one (**11**),<sup>[11]</sup> isolated by flash column chromatography (petroleum ether/EtOAc = 20:1, v/v) in 44% yield (35.8 mg), white solid: mp 118 – 119 °C. *R<sub>f</sub>* (petroleum ether/EtOAc = 5:1, v/v) 0.33. <sup>1</sup>H NMR (400 MHz, CDCl<sub>3</sub>) δ 8.29 (d, *J* = 7.9 Hz, 1H), 7.75 (ddd, *J* = 1.5,

[10] Z. Zhang, L. Zhang, Y. Cao, F. Li, G. Bai, G. Liu, Y. Yang and F. Mo, *Org. Lett.*, 2019, **21**, 762–766.

[11] J. Zheng, Z. Deng, Y. Zhang and S. Cui, *Adv. Synth. Catal.*, 2016, **358**, 746–751.

7.1, 8.6 Hz, 1H), 7.67 (d,  $J = 8.1$  Hz, 1H), 7.48 (dd,  $J = 7.6, 7.4$  Hz, 1H), 4.43 – 4.37 (m, 1H), 3.99 – 3.91 (m, 1H), 3.58 – 3.49 (m, 1H), 3.34 – 3.21 (m, 1H), 2.72 – 2.65 (m, 1H), 2.36 – 2.22 (m, 1H), 2.10 – 1.99 (m, 1H).  $^{13}\text{C}\{^1\text{H}\}$  NMR (101 MHz,  $\text{CDCl}_3$ )  $\delta$  160.8, 158.5, 148.9, 134.3, 127.1, 126.7, 126.6 (q,  $J = 276.8$  Hz), 126.5, 120.8, 44.7, 38.4 (q,  $J = 2.8$  Hz), 36.0 (q,  $J = 29.1$  Hz), 27.5.  $^{19}\text{F}$  NMR (376 MHz,  $\text{CDCl}_3$ )  $\delta$  -64.68 (t,  $J = 10.5$  Hz, 3F). HRMS (ESI-TOF) Calcd for  $\text{C}_{13}\text{H}_{12}\text{F}_3\text{N}_2\text{O}^+$  ( $[\text{M}+\text{H}]^+$ ) 269.0896. Found 269.0898.

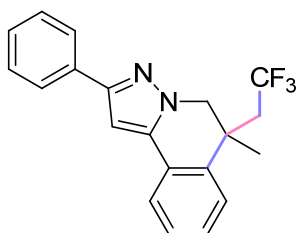

6-Methyl-2-phenyl-6-(2,2,2-trifluoroethyl)-5,6-dihydropyrazolo[5,1-*a*]isoquinoline (**13a**), isolated by flash column chromatography (petroleum ether/EtOAc = 20:1, v/v) in 86% yield (88.8 mg), white solid: mp 107 – 108 °C.  $R_f$  (petroleum ether/EtOAc = 5:1, v/v) 0.33.  $^1\text{H}$  NMR (400 MHz,  $\text{CDCl}_3$ )  $\delta$  7.87 – 7.85 (m, 2H), 7.65 – 7.63 (m, 1H), 7.47 – 7.30 (m, 6H), 6.88 (s, 1H), 4.42 (d,  $J = 13.3$  Hz, 1H), 4.11 (dd,  $J = 12.3, 1.0$  Hz, 1H), 2.40 (d,  $J = 11.2$  Hz, 1H), 2.34 (dd,  $J = 10.4, 0.7$  Hz, 1H), 1.66 (d,  $J = 1.3$  Hz, 3H).  $^{13}\text{C}\{^1\text{H}\}$  NMR (101 MHz,  $\text{CDCl}_3$ )  $\delta$  151.6, 139.2, 137.5, 133.2, 128.74, 128.67, 128.1, 127.8, 126.1 (q,  $J = 277.1$  Hz), 125.8, 125.6, 125.3, 124.7, 98.0, 56.1 (q,  $J = 1.2$  Hz), 41.2 (q,  $J = 26.9$  Hz), 37.2 (d,  $J = 1.7$  Hz), 22.5 (d,  $J = 1.9$  Hz).  $^{19}\text{F}$  NMR (376 MHz,  $\text{CDCl}_3$ )  $\delta$  -59.45 (t,  $J = 11.8$  Hz, 3F). HRMS (ESI-TOF) Calcd for  $\text{C}_{20}\text{H}_{18}\text{F}_3\text{N}_2^+$  ( $[\text{M}+\text{H}]^+$ ) 343.1417. Found 343.1413.

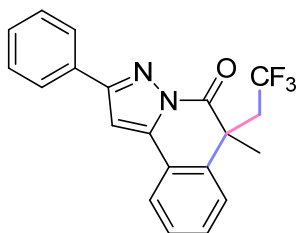

6-Methyl-2-phenyl-6-(2,2,2-trifluoroethyl)pyrazolo[5,1-*a*]isoquinolin-5(6*H*)-one (**13b**), isolated by flash column chromatography (petroleum ether/EtOAc = 20:1, v/v) in 67% yield (72.0 mg), white solid: mp 59 – 60 °C.  $R_f$  (petroleum ether/EtOAc = 5:1, v/v) 0.33.  $^1\text{H}$  NMR (400 MHz,  $\text{CDCl}_3$ )  $\delta$  8.05 – 8.03 (m, 2H), 7.84 – 7.82 (m, 1H), 7.52 – 7.42 (m, 6H), 7.15 (s, 1H), 3.57 – 3.45 (m, 1H), 2.98 – 2.87 (m, 1H), 1.76 (s, 3H).  $^{13}\text{C}\{^1\text{H}\}$  NMR (101 MHz,  $\text{CDCl}_3$ )  $\delta$  168.3, 158.2, 143.7, 136.4, 131.0, 130.0,

129.9, 128.8, 128.3, 126.91, 126.86, 125.0 (q,  $J = 277.2$  Hz), 124.8, 122.1, 101.8, 45.6 (q,  $J = 2.2$  Hz), 44.0 (q,  $J = 27.5$  Hz), 31.0.  $^{19}\text{F}$  NMR (376 MHz,  $\text{CDCl}_3$ )  $\delta$  -61.26 (p,  $J = 5.2$  Hz, 3F). HRMS (ESI-TOF) Calcd for  $\text{C}_{20}\text{H}_{16}\text{F}_3\text{N}_2\text{O}^+$  ( $[\text{M}+\text{H}]^+$ ) 357.1209. Found 357.1210.

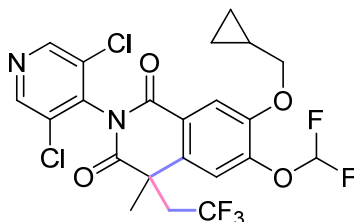

7-(Cyclopropylmethoxy)-2-(3,5-dichloropyridin-4-yl)-6-(difluoromethoxy)-4-methyl-4-(2,2,2-trifluoroethyl)-3,4-dihydroisoquinolin-1(2H)-one (**15**), isolated by flash column chromatography (petroleum ether/EtOAc = 20:1, v/v) in 66% yield (106.2 mg), white solid: mp 183 – 184 °C.  $R_f$  (petroleum ether/EtOAc = 5:1, v/v) 0.33.  $^1\text{H}$  NMR (400 MHz,  $\text{CDCl}_3$ )  $\delta$  8.69 (s, 1H), 8.67 (s, 1H), 7.79 (s, 1H), 7.28 (s, 1H), 6.83 (t,  $J = 74.6$  Hz, 1H), 4.03 – 3.95 (m, 2H), 3.52 – 3.40 (m, 1H), 2.93 – 2.82 (m, 1H), 1.76 (s, 3H), 1.39 – 1.29 (m, 1H), 0.72 – 0.68 (m, 2H), 0.41 – 0.37 (m, 2H).  $^{13}\text{C}\{^1\text{H}\}$  NMR (101 MHz,  $\text{CDCl}_3$ )  $\delta$  172.2, 160.6, 150.4, 148.6 (d,  $J = 46.8$  Hz), 145.4 (t,  $J = 3.1$  Hz), 139.1, 133.7, 132.3, 131.3, 124.7 (q,  $J = 277.1$  Hz), 121.3, 120.1, 115.4 (t,  $J = 261.3$  Hz), 113.5, 74.3, 44.7 (q,  $J = 2.3$  Hz), 42.7 (q,  $J = 27.9$  Hz), 32.3, 9.9, 3.38, 3.34.  $^{19}\text{F}$  NMR (376 MHz,  $\text{CDCl}_3$ )  $\delta$  -60.41 (t,  $J = 9.4$  Hz, 3F), -82.16 – -82.41 (m, 2F). HRMS (ESI-TOF) Calcd for  $\text{C}_{22}\text{H}_{18}\text{Cl}_2\text{F}_5\text{N}_2\text{O}_4^+$  ( $[\text{M}+\text{H}]^+$ ) 539.0558. Found 539.0566.

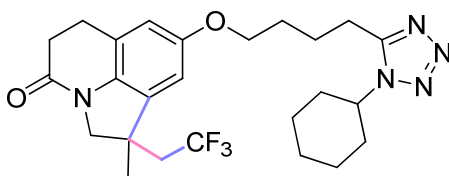

8-(4-(1-Cyclohexyl-1H-tetrazol-5-yl)butoxy)-1-methyl-1-(2,2,2-trifluoroethyl)-5,6-dihydro-1H-pyrrolo[3,2,1-*ij*]quinolin-4(2H)-one (**17**), isolated by flash column chromatography (petroleum ether/EtOAc = 20:1, v/v) in 75% yield (110.8 mg), colorless oil.  $R_f$  (petroleum ether/EtOAc = 5:1, v/v) 0.33.  $^1\text{H}$  NMR (400 MHz,  $\text{CDCl}_3$ )  $\delta$  6.61 – 6.60 (m, 1H), 6.57 (d,  $J = 2.2$  Hz, 1H), 4.17 – 4.09 (m, 2H), 3.98 (t,  $J = 6.0$  Hz, 2H), 3.87 (d,  $J = 12.3$  Hz, 1H), 3.31 (q,  $J = 7.2$  Hz, 1H), 2.98 – 2.90 (m, 3H), 2.68 (t,  $J = 7.7$  Hz, 2H), 2.60 – 2.39 (m, 2H), 2.08 – 1.98 (m, 7H), 1.93 – 1.87 (m, 3H), 1.46 – 1.30 (m, 7H).  $^{13}\text{C}\{^1\text{H}\}$  NMR (101 MHz,  $\text{CDCl}_3$ )  $\delta$  166.8, 156.2, 153.5, 135.8,

133.7, 126.0 (q,  $J = 277.1$  Hz), 121.3, 112.9, 107.9, 68.1, 58.0 (q,  $J = 2.1$  Hz), 57.6, 43.4 (q,  $J = 26.9$  Hz), 42.4 (q,  $J = 1.9$  Hz), 32.9, 31.3, 28.6, 26.7 (d,  $J = 1.3$  Hz), 25.3, 24.8, 24.6, 24.0, 23.0.  $^{19}\text{F}$  NMR (376 MHz,  $\text{CDCl}_3$ )  $\delta$  -60.50 (t,  $J = 11.8$  Hz, 3F). HRMS (ESI-TOF) Calcd for  $\text{C}_{25}\text{H}_{33}\text{F}_3\text{N}_5\text{O}_2^+$  ( $[\text{M}+\text{H}]^+$ ) 492.2581. Found 492.2580.

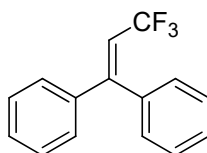

(3,3,3-Trifluoroprop-1-ene-1,1-diyl)dibenzene (**18**),<sup>[4]</sup> isolated by flash column chromatography (pure petroleum ether) in 36% yield (26.8 mg), colorless oil.  $R_f$ (pure petroleum ether) 0.50.  $^1\text{H}$  NMR (400 MHz,  $\text{CDCl}_3$ )  $\delta$  7.41 – 7.37 (m, 3H), 7.36 – 7.30 (m, 3H), 7.27 – 7.22 (m, 4H), 6.12 (q,  $J = 8.3$  Hz, 1H).  $^{13}\text{C}\{^1\text{H}\}$  NMR (101 MHz,  $\text{CDCl}_3$ )  $\delta$  152.5 (q,  $J = 5.6$  Hz), 140.1, 137.3, 129.4, 129.1 (q,  $J = 1.9$  Hz), 128.5 (d,  $J = 1.5$  Hz), 128.03, 127.96, 123.1 (q,  $J = 269.0$  Hz), 115.4 (q,  $J = 33.9$  Hz).  $^{19}\text{F}$  NMR (376 MHz,  $\text{CDCl}_3$ )  $\delta$  -55.60 (d,  $J = 8.5$  Hz, 3F). HRMS (ESI-TOF) Calcd for  $\text{C}_{15}\text{H}_{12}\text{F}_3^+$  ( $[\text{M}+\text{H}]^+$ ) 249.0886. Found 249.0885.

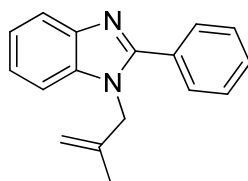

1-(2-Methylallyl)-2-phenyl-1H-benzo[*d*]imidazole (**1a**),<sup>[12]</sup> white solid: mp 100 – 101 °C.  $^1\text{H}$  NMR (400 MHz,  $\text{CDCl}_3$ )  $\delta$  7.87 – 7.83 (m, 1H), 7.79 – 7.75 (m, 2H), 7.52 – 7.49 (m, 3H), 7.34 – 7.27 (m, 3H), 5.02 (p,  $J = 1.5$  Hz, 1H), 4.69 (s, 2H), 4.64 (s, 1H), 1.81 (s, 3H).  $^{13}\text{C}\{^1\text{H}\}$  NMR (101 MHz,  $\text{CDCl}_3$ )  $\delta$  154.0, 143.0, 139.8, 136.1, 130.2, 129.9, 129.1, 128.7, 122.9, 122.5, 119.9, 112.2, 110.5, 50.4, 20.2. HRMS (ESI-TOF) Calcd for  $\text{C}_{17}\text{H}_{17}\text{N}_2^+$  ( $[\text{M}+\text{H}]^+$ ) 249.1386. Found 249.1381.

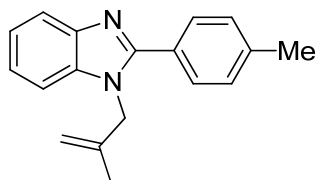

1-(2-Methylallyl)-2-(*p*-tolyl)-1H-benzo[*d*]imidazole (**1c1**), white solid: mp 110 –

[12] R. Kong, T. Fu, R. Yang, D. Chen, D. Liang, Y. Dong, W. Li and B. Wang, *ChemCatChem*, 2021, **13**, 2952–2958.

111 °C.  $^1\text{H}$  NMR (400 MHz,  $\text{CDCl}_3$ )  $\delta$  7.74 (dd,  $J = 3.9, 2.0$  Hz, 1H), 7.56 (d,  $J = 8.0$  Hz, 2H), 7.21 – 7.14 (m, 5H), 4.89 (s, 1H), 4.56 (s, 2H), 4.53 (s, 1H), 2.32 (s, 3H), 1.68 (s, 3H).  $^{13}\text{C}\{^1\text{H}\}$  NMR (101 MHz,  $\text{CDCl}_3$ )  $\delta$  154.2, 143.0, 140.0, 139.8, 136.1, 129.4, 129.0, 127.3, 122.7, 122.4, 119.8, 112.1, 110.4, 50.3, 21.5, 20.2. HRMS (ESI-TOF) Calcd for  $\text{C}_{18}\text{H}_{19}\text{N}_2^+$  ( $[\text{M}+\text{H}]^+$ ) 263.1543. Found 263.1541.

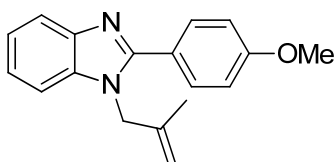

2-(4-Methoxyphenyl)-1-(2-methylallyl)-1*H*-benzo[*d*]imidazole (**1c2**), white solid: mp 108 – 109 °C.  $^1\text{H}$  NMR (400 MHz,  $\text{CDCl}_3$ )  $\delta$  7.75 – 7.73 (m, 1H), 7.63 (d,  $J = 8.8$  Hz, 2H),  $\delta$  7.24 – 7.16 (m, 3H), 6.94 (d,  $J = 8.8$  Hz, 2H), 4.93 (s, 1H), 4.58 (s, 2H), 4.55 (s, 1H), 3.79 (s, 3H), 1.73 (s, 3H).  $^{13}\text{C}\{^1\text{H}\}$  NMR (101 MHz,  $\text{CDCl}_3$ )  $\delta$  160.9, 154.0, 143.0, 139.9, 136.1, 130.5, 122.6, 122.5, 122.4, 119.6, 114.2, 112.1, 110.3, 55.4, 50.4, 20.2. HRMS (ESI-TOF) Calcd for  $\text{C}_{18}\text{H}_{19}\text{N}_2\text{O}^+$  ( $[\text{M}+\text{H}]^+$ ) 279.1492. Found 279.1480.

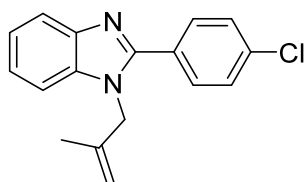

2-(4-Chlorophenyl)-1-(2-methylallyl)-1*H*-benzo[*d*]imidazole (**1c3**), white solid: mp 108 – 109 °C.  $^1\text{H}$  NMR (400 MHz,  $\text{CDCl}_3$ )  $\delta$  7.85 – 7.82 (m, 1H), 7.71 (ddd,  $J = 8.5, 2.5, 2.0$  Hz, 2H), 7.48 (ddd,  $J = 8.5, 2.5, 2.0$  Hz, 2H), 7.34 – 7.29 (m, 3H), 5.02 (s, 1H), 4.65 (s, 2H), 4.61 (s, 1H), 1.81 (s, 3H).  $^{13}\text{C}\{^1\text{H}\}$  NMR (101 MHz,  $\text{CDCl}_3$ )  $\delta$  152.8, 142.9, 139.7, 136.1, 130.3, 129.0, 128.6, 123.2, 122.7, 119.9, 112.3, 110.4, 50.3, 20.2. HRMS (ESI-TOF) Calcd for  $\text{C}_{17}\text{H}_{16}\text{ClN}_2^+$  ( $[\text{M}+\text{H}]^+$ ) 283.0997. Found 283.0999.

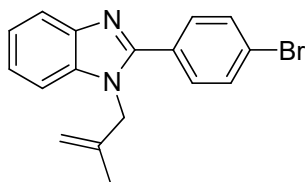

2-(4-Bromophenyl)-1-(2-methylallyl)-1*H*-benzo[*d*]imidazole (**1c4**), white solid: mp 91 – 92 °C.  $^1\text{H}$  NMR (400 MHz,  $\text{CDCl}_3$ )  $\delta$  7.77 – 7.72 (m, 1H), 7.58 – 7.53 (m, 4H),

7.25 – 7.18 (m, 3H), 4.92 (dd,  $J = 1.5, 1.6$  Hz, 1H), 4.56 (s, 2H), 4.51 (s, 1H), 1.72 (s, 3H).  $^{13}\text{C}\{^1\text{H}\}$  NMR (101 MHz,  $\text{CDCl}_3$ )  $\delta$  152.8, 142.9, 139.7, 136.2, 132.0, 130.6, 129.1, 124.5, 123.2, 122.7, 120.0, 112.3, 110.4, 50.3, 20.2. HRMS (ESI-TOF) Calcd for  $\text{C}_{17}\text{H}_{16}\text{BrN}_2^+$  ( $[\text{M}+\text{H}]^+$ ) 327.0491. Found 327.0494.

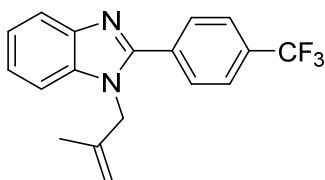

1-(2-Methylallyl)-2-(4-(trifluoromethyl)phenyl)-1*H*-benzo[*d*]imidazole (**1c5**), white solid: mp 97 – 98 °C.  $^1\text{H}$  NMR (400 MHz,  $\text{CDCl}_3$ )  $\delta$  7.92 (d,  $J = 8.1$  Hz, 2H), 7.88 – 7.85 (m, 1H), 7.78 (d,  $J = 8.2$  Hz, 2H), 7.37 – 7.32 (m, 3H), 5.04 (s, 1H), 4.69 (s, 2H), 4.63 (s, 1H), 1.84 (s, 3H).  $^{13}\text{C}\{^1\text{H}\}$  NMR (101 MHz,  $\text{CDCl}_3$ )  $\delta$  152.3, 142.9, 139.6, 136.2, 133.7 (q,  $J = 1.5$  Hz), 131.7 (q,  $J = 32.4$  Hz), 129.4, 125.7 (q,  $J = 3.7$  Hz), 123.9 (q,  $J = 270.8$  Hz), 123.5, 122.9, 120.1, 112.4, 110.5, 50.4, 20.2.  $^{19}\text{F}$  NMR (376 MHz,  $\text{CDCl}_3$ )  $\delta$  -62.79 (s, 3F). HRMS (ESI-TOF) Calcd for  $\text{C}_{18}\text{H}_{16}\text{F}_3\text{N}_2^+$  ( $[\text{M}+\text{H}]^+$ ) 317.1260. Found 317.1271.

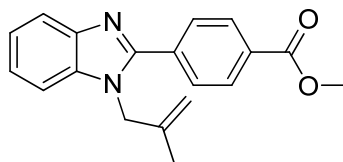

Methyl 4-(1-(2-methylallyl)-1*H*-benzo[*d*]imidazol-2-yl)benzoate (**1c6**), white solid: mp 96 – 97 °C.  $^1\text{H}$  NMR (400 MHz,  $\text{CDCl}_3$ )  $\delta$  8.19 – 8.16 (m, 2H), 7.88 – 7.85 (m, 3H), 7.36 – 7.30 (m, 3H), 5.03 (t,  $J = 1.3$ , 1H), 4.70 (s, 2H), 4.63 (s, 1H), 3.97 (s, 3H), 1.82 (s, 3H).  $^{13}\text{C}\{^1\text{H}\}$  NMR (101 MHz,  $\text{CDCl}_3$ )  $\delta$  166.5, 152.7, 143.0, 139.6, 136.2, 134.4, 131.2, 129.9, 129.1, 123.4, 122.9, 120.1, 112.4, 110.5, 52.4, 50.4, 20.2. HRMS (ESI-TOF) Calcd for  $\text{C}_{19}\text{H}_{19}\text{N}_2\text{O}_2^+$  ( $[\text{M}+\text{H}]^+$ ) 307.1441. Found 307.1445.

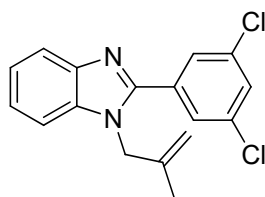

2-(3,5-Dichlorophenyl)-1-(2-methylallyl)-1*H*-benzo[*d*]imidazole (**1d**), pink solid: mp 79 – 80 °C.  $^1\text{H}$  NMR (400 MHz,  $\text{CDCl}_3$ )  $\delta$  7.86 – 7.82 (m, 1H), 7.70 (d,  $J = 1.9$  Hz,



2H), 7.50 (dd,  $J = 1.9, 1.8$  Hz, 1H), 7.37 – 7.31 (m,  $J = 4.4, 2.1$  Hz, 3H), 5.06 (s, 1H), 4.69 (s, 2H), 4.60 (s, 1H), 1.84 (s, 3H).  $^{13}\text{C}\{^1\text{H}\}$  NMR (101 MHz,  $\text{CDCl}_3$ )  $\delta$  150.9, 142.8, 139.5, 136.2, 135.5, 133.0, 129.8, 127.4, 123.7, 123.0, 120.2, 112.7, 110.5, 50.4, 20.1. HRMS (ESI-TOF) Calcd for  $\text{C}_{17}\text{H}_{15}\text{Cl}_2\text{N}_2^+$  ( $[\text{M}+\text{H}]^+$ ) 317.0607. Found 317.0609.

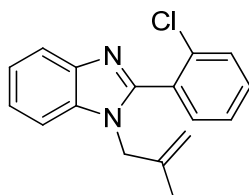

2-(2-Chlorophenyl)-1-(2-methylallyl)-1*H*-benzo[*d*]imidazole (**1e**), pale yellow oil.  $^1\text{H}$  NMR (400 MHz,  $\text{CDCl}_3$ )  $\delta$  7.88 – 7.83 (m, 1H), 7.54 – 7.51 (m, 2H), 7.49 – 7.44 (m, 1H), 7.43 – 7.37 (m, 2H), 7.35 – 7.28 (m, 2H), 4.86 (p,  $J = 1.4$  Hz, 1H), 4.61 (t,  $J = 1.2, 1.3$  Hz, 1H), 4.58 (s, 2H), 1.54 (s, 3H).  $^{13}\text{C}\{^1\text{H}\}$  NMR (101 MHz,  $\text{CDCl}_3$ )  $\delta$  151.3, 143.0, 139.4, 134.9, 134.3, 132.3, 131.3, 130.0, 129.8, 126.9, 123.0, 122.4, 120.2, 113.2, 110.7, 50.4, 19.9. HRMS (ESI-TOF) Calcd for  $\text{C}_{17}\text{H}_{16}\text{ClN}_2^+$  ( $[\text{M}+\text{H}]^+$ ) 283.0997. Found 283.0999.

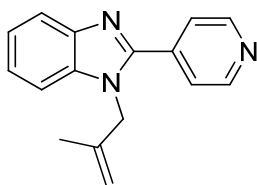

1-(2-Methylallyl)-2-(pyridin-4-yl)-1*H*-benzo[*d*]imidazole (**1f**), brown solid: mp 115 – 116 °C.  $^1\text{H}$  NMR (400 MHz,  $\text{CDCl}_3$ )  $\delta$  8.78 – 8.75 (m, 2H), 7.88 – 7.85 (m, 1H), 7.70 – 7.68 (m, 2H), 7.34 – 7.31 (m, 3H), 5.02 (s, 1H), 4.69 (s, 2H), 4.57 (s, 1H), 1.83 (s, 3H).  $^{13}\text{C}\{^1\text{H}\}$  NMR (101 MHz,  $\text{CDCl}_3$ )  $\delta$  150.9, 150.3, 142.8, 139.4, 137.7, 136.3, 123.8, 123.1, 123.0, 120.3, 112.4, 110.6, 50.3, 20.2. HRMS (ESI-TOF) Calcd for  $\text{C}_{16}\text{H}_{16}\text{N}_3^+$  ( $[\text{M}+\text{H}]^+$ ) 250.1339. Found 250.1335.

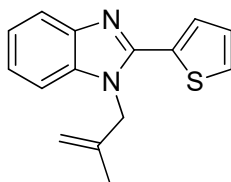

1-(2-Methylallyl)-2-(thiophen-2-yl)-1*H*-benzo[*d*]imidazole (**1g**), pale yellow solid: mp 121 – 122 °C.  $^1\text{H}$  NMR (400 MHz,  $\text{CDCl}_3$ )  $\delta$  7.74 – 7.71 (m, 1H), 7.37 (dd,  $J =$

5.1, 1.1 Hz, 1H), 7.32 (dd,  $J = 3.8, 1.1$  Hz, 1H), 7.20 – 7.13 (m, 3H), 7.03 (dd,  $J = 5.1, 3.7$  Hz, 1H), 4.86 (s, 1H), 4.67 (s, 2H), 4.41 (s, 1H), 1.75 (s, 3H).  $^{13}\text{C}\{^1\text{H}\}$  NMR (101 MHz,  $\text{CDCl}_3$ )  $\delta$  148.0, 142.9, 139.3, 136.2, 132.1, 128.7, 127.9, 127.7, 123.1, 122.7, 119.7, 112.0, 109.9, 50.0, 20.2. HRMS (ESI-TOF) Calcd for  $\text{C}_{15}\text{H}_{15}\text{N}_2\text{S}^+$  ( $[\text{M}+\text{H}]^+$ ) 255.0950. Found 255.0951.

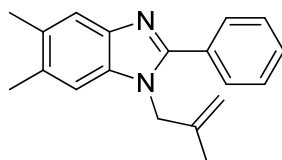

5,6-Dimethyl-1-(2-methylallyl)-2-phenyl-1*H*-benzo[*d*]imidazole (**1h1**), yellowish solid: mp 237 – 238 °C.  $^1\text{H}$  NMR (400 MHz,  $\text{CDCl}_3$ )  $\delta$  7.77 – 7.72 (m, 2H), 7.59 (s, 1H), 7.51 – 7.46 (m, 3H), 7.07 (s, 1H), 5.00 (t,  $J = 1.5, 1.6$  Hz, 1H), 4.63 (s, 3H), 2.40 (s, 6H), 1.81 (s, 4H).  $^{13}\text{C}\{^1\text{H}\}$  NMR (101 MHz,  $\text{CDCl}_3$ )  $\delta$  153.2, 141.6, 140.0, 134.7, 132.0, 131.4, 130.5, 129.6, 129.0, 128.6, 119.9, 112.0, 110.5, 50.3, 20.6, 20.3, 20.2. HRMS (ESI-TOF) Calcd for  $\text{C}_{19}\text{H}_{21}\text{N}_2^+$  ( $[\text{M}+\text{H}]^+$ ) 277.1699. Found 277.1709.

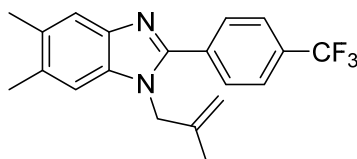

5,6-Dimethyl-1-(2-methylallyl)-2-(4-(trifluoromethyl)phenyl)-1*H*-benzo[*d*]imidazole (**1h2**), white solid: mp 123 – 124 °C.  $^1\text{H}$  NMR (400 MHz,  $\text{CDCl}_3$ )  $\delta$  7.93 – 7.85 (m, 2H), 7.75 (d,  $J = 8.3$  Hz, 2H), 7.60 (s, 1H), 7.08 (s, 1H), 5.03 (dt,  $J = 2.7, 1.4$  Hz, 1H), 4.63 (dd,  $J = 2.1, 1.0$  Hz, 2H), 4.61 (dd,  $J = 1.8, 1.0$  Hz, 1H), 2.40 (d,  $J = 1.1$  Hz, 6H), 1.83 (t,  $J = 1.1$  Hz, 3H).  $^{13}\text{C}\{^1\text{H}\}$  NMR (101 MHz,  $\text{CDCl}_3$ )  $\delta$  151.5, 141.6, 139.8, 134.8, 134.0 (d,  $J = 1.2$  Hz), 132.8, 131.9, 131.4 (q,  $J = 32.7$  Hz), 129.3, 125.6 (q,  $J = 3.7$  Hz), 123.9 (q,  $J = 272.4$  Hz), 120.1, 112.2, 110.6, 50.3, 20.7, 20.3, 20.2.  $^{19}\text{F}$  NMR (376 MHz,  $\text{CDCl}_3$ )  $\delta$  -62.78 (s, 3F). HRMS (ESI-TOF) Calcd for  $\text{C}_{20}\text{H}_{20}\text{F}_3\text{N}_2^+$  ( $[\text{M}+\text{H}]^+$ ) 345.1573. Found 345.1571.

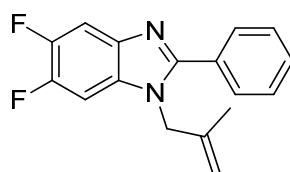

5,6-Difluoro-1-(2-methylallyl)-2-phenyl-1*H*-benzo[*d*]imidazole (**1i**), white solid: mp 103 – 104 °C.  $^1\text{H}$  NMR (400 MHz,  $\text{CDCl}_3$ )  $\delta$  7.75 – 7.69 (m, 2H), 7.59 (dd,  $J = 10.4,$

7.3 Hz, 1H), 7.53 – 7.50 (m, 3H), 7.11 (dd,  $J = 9.8, 6.9$  Hz, 1H), 5.05 (q,  $J = 1.4$  Hz, 1H), 4.64 (s, 3H), 1.79 (s, 3H).  $^{13}\text{C}\{^1\text{H}\}$  NMR (101 MHz,  $\text{CDCl}_3$ )  $\delta$  155.5 (d,  $J = 3.1$  Hz), 149.3 (dd,  $J = 4.1, 15.6$  Hz), 146.9 (dd,  $J = 2.0, 15.6$  Hz), 139.2, 138.1 (d,  $J = 10.4$  Hz), 131.4 (d,  $J = 10.6$  Hz), 130.2, 129.6, 128.9, 128.8, 112.6, 107.2 (d,  $J = 19.4$  Hz), 98.5 (d,  $J = 22.8$  Hz), 50.7, 20.1.  $^{19}\text{F}$  NMR (376 MHz,  $\text{CDCl}_3$ )  $\delta$  -141.24 – -141.34 (m, 1F),  $\delta$  -143.32 – -143.42 (m, 1F). HRMS (ESI-TOF) Calcd for  $\text{C}_{17}\text{H}_{15}\text{F}_2\text{N}_2^+$  ( $[\text{M}+\text{H}]^+$ ) 285.1198. Found 285.1196.

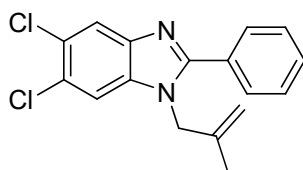

5,6-Dichloro-1-(2-methylallyl)-2-phenyl-1*H*-benzo[*d*]imidazole (**1j1**), brown solid: mp 158 – 159 °C.  $^1\text{H}$  NMR (400 MHz,  $\text{CDCl}_3$ )  $\delta$  7.89 (s, 1H), 7.75 – 7.70 (m, 2H), 7.55 – 7.48 (m, 3H), 7.40 (s, 1H), 5.04 (s, 1H), 4.63 (s, 2H), 4.60 (s, 1H), 1.79 (s, 3H).  $^{13}\text{C}\{^1\text{H}\}$  NMR (101 MHz,  $\text{CDCl}_3$ )  $\delta$  155.9, 142.4, 139.2, 135.3, 130.4, 129.3, 129.0, 128.9, 126.8, 126.6, 121.0, 112.6, 111.8, 50.6, 20.1. HRMS (ESI-TOF) Calcd for  $\text{C}_{17}\text{H}_{15}\text{Cl}_2\text{N}_2^+$  ( $[\text{M}+\text{H}]^+$ ) 317.0607. Found 317.0611.

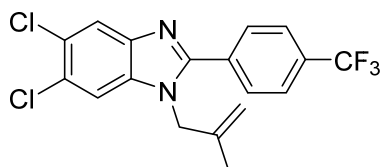

5,6-Dichloro-1-(2-methylallyl)-2-(4-(trifluoromethyl)phenyl)-1*H*-benzo[*d*]imidazole (**1j2**), yellowish solid: mp 147 – 148 °C.  $^1\text{H}$  NMR (400 MHz,  $\text{CDCl}_3$ )  $\delta$  7.92 (s, 1H), 7.90 – 7.85 (m, 2H), 7.79 (d,  $J = 8.2$  Hz, 2H), 7.43 (s, 1H), 5.08 (q,  $J = 1.6$  Hz, 1H), 4.64 (s, 2H), 4.60 (p,  $J = 1.1$  Hz, 1H), 1.83 (s, 3H).  $^{13}\text{C}\{^1\text{H}\}$  NMR (101 MHz,  $\text{CDCl}_3$ )  $\delta$  154.2, 142.2, 139.0, 135.4, 132.8 (q,  $J = 1.1$  Hz), 132.3 (q,  $J = 32.9$  Hz), 129.4, 127.5, 127.1, 125.9 (q,  $J = 3.8$  Hz), 123.7 (q,  $J = 272.5$  Hz), 121.3, 112.8, 111.9, 50.6, 20.1.  $^{19}\text{F}$  NMR (376 MHz,  $\text{CDCl}_3$ )  $\delta$  -62.91 (s, 3F). HRMS (ESI-TOF) Calcd for  $\text{C}_{18}\text{H}_{14}\text{Cl}_2\text{F}_3\text{N}_2^+$  ( $[\text{M}+\text{H}]^+$ ) 385.0481. Found 385.0476.

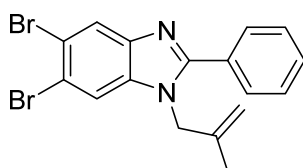

5,6-Dibromo-1-(2-methylallyl)-2-phenyl-1*H*-benzo[*d*]imidazole (**1k**), white solid: mp 193 – 194 °C. <sup>1</sup>H NMR (400 MHz, DMSO-*d*<sub>6</sub>) δ 8.14 (s, 1H), 8.07 (s, 1H), 7.77 (dd, *J* = 6.6, 2.9 Hz, 2H), 7.58 (dd, *J* = 5.1, 1.9 Hz, 3H), 4.88 (t, *J* = 1.6 Hz, 1H), 4.86 (s, 2H), 4.26 (s, 1H), 1.71 (s, 3H). <sup>13</sup>C{<sup>1</sup>H} NMR (101 MHz, DMSO-*d*<sub>6</sub>) δ 155.7, 143.2, 141.1, 136.9, 130.8, 129.6, 129.4, 129.3, 123.9, 117.3, 117.0, 116.4, 111.2, 50.1, 20.3. HRMS (ESI-TOF) Calcd for C<sub>17</sub>H<sub>15</sub>Br<sub>2</sub>N<sub>2</sub><sup>+</sup> ([M+H]<sup>+</sup>) 404.9597. Found 404.9609.

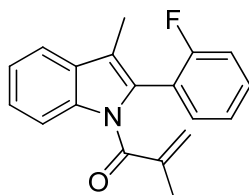

1-(2-(2-Fluorophenyl)-3-methyl-1*H*-indol-1-yl)-2-methylprop-2-en-1-one (**1m**), brown solid: mp 87 – 88 °C. <sup>1</sup>H NMR (400 MHz, CDCl<sub>3</sub>) δ 8.02 (dd, *J* = 7.7, 1.3 Hz, 1H), 7.59 – 7.57 (m, 1H), 7.38 – 7.34 (m, 1H), 7.32 (dd, *J* = 4.4, 1.6 Hz, 1H), 7.30 – 7.26 (m, 1H), 7.25 – 7.23 (m, 1H), 7.20 (ddd, *J* = 1.2, 6.1, 7.5 Hz, 1H), 7.13 – 7.09 (m, 1H), 5.34 (q, *J* = 1.7 Hz, 1H), 5.28 (s, 1H), 2.22 (s, 3H), 1.86 (t, *J* = 1.2 Hz, 3H). <sup>13</sup>C{<sup>1</sup>H} NMR (101 MHz, CDCl<sub>3</sub>) δ 170.5, 160.8, 158.3, 140.8, 136.9, 131.6 (d, *J* = 12.2 Hz), 129.9 (q, *J* = 75.9 Hz), 124.8, 124.6, 124.1 (d, *J* = 14.2 Hz), 122.8, 121.8 (d, *J* = 60.5 Hz), 119.0, 118.0, 115.7 (d, *J* = 86.5 Hz), 114.5, 18.5, 9.3 (d, *J* = 5.8 Hz). <sup>19</sup>F NMR (376 MHz, CDCl<sub>3</sub>) δ -112.64 – -112.69 (m, 1F). HRMS (ESI-TOF) Calcd for C<sub>19</sub>H<sub>17</sub>FNO<sup>+</sup> ([M+H]<sup>+</sup>) 294.1289. Found 294.1289.

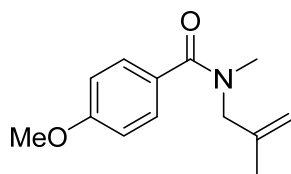

4-Methoxy-*N*-methyl-*N*-(2-methylallyl)benzamide (**8b**),<sup>[12]</sup> 2:3 mixture of rotamers due to the restricted rotation of the N-(CO) bond, pale yellow oil. <sup>1</sup>H NMR (400 MHz, CDCl<sub>3</sub>) δ 7.42 (d, *J* = 8.6 Hz, 2H), 6.89 (d, *J* = 8.2 Hz, 2H), 4.98 (s, 1H), 4.92 (s, 1H), 4.11 (brs, 1H), 3.82 (s, 4H), 3.01 (brs, 3H major), 2.94 (brs, 3H minor), 1.76 (brs, 3H minor), 1.63 (brs, 3H major). <sup>13</sup>C{<sup>1</sup>H} NMR (101 MHz, CDCl<sub>3</sub>) δ 172.2 (br, major), 171.3 (br, minor), 160.6, 140.6, 128.7 (br), 128.4 (br), 113.6, 112.3 (br, minor), 112.0 (br, major), 57.5 (br, major), 55.3, 53.1 (br, minor), 37.1 (br, minor), 33.6 (br, major), 20.0. HRMS (ESI-TOF) Calcd for C<sub>13</sub>H<sub>18</sub>NO<sub>2</sub><sup>+</sup> ([M+H]<sup>+</sup>) 220.1332. Found 220.1330.

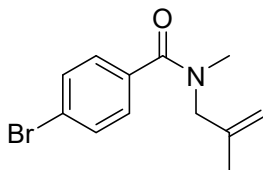

4-Bromo-*N*-methyl-*N*-(2-methylallyl)benzamide (**8c**),<sup>[12]</sup> 2:3 mixture of rotamers due to the restricted rotation of the N-(CO) bond, pale yellow oil. <sup>1</sup>H NMR (400 MHz, CDCl<sub>3</sub>) δ 7.52 (dd, *J* = 13.2, 7.9 Hz, 2H major and 2 H minor), 7.41 – 7.17 (m, 2H major and 2 H minor), 4.97 – 4.87 (stack, 2H major and 2 H minor), 4.11 (s, 2H minor), 3.74 (s, 2H major), 3.03 (s, 3H major), 2.87 (s, 3H minor), 1.76 (s, 3H minor), 1.60 (s, 3H major). <sup>13</sup>C{<sup>1</sup>H} NMR (101 MHz, CDCl<sub>3</sub>) δ 171.2 (major), 170.3 (minor), 140.3 (major), 140.0 (minor), 135.3 (minor), 135.0 (major), 131.5, 128.6 (minor), 128.4 (major), 123.9 (major), 123.8 (minor), 112.7 (minor), 112.2 (major), 57.2 (major), 52.9 (minor), 36.8 (minor), 33.5 (major), 19.9. HRMS (ESI-TOF) Calcd for C<sub>12</sub>H<sub>15</sub>BrNO<sup>+</sup> ([M+H]<sup>+</sup>) 268.0332. Found 268.0335.

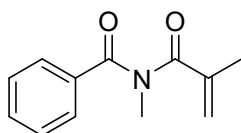

*N*-Methacryloyl-*N*-methylbenzamide (**8d**),<sup>[13]</sup> yellowish oil. <sup>1</sup>H NMR (400 MHz, CDCl<sub>3</sub>) δ 7.48 (ddd, *J* = 6.9, 6.9, 1.2 Hz, 3H), 7.40 (dddd, *J* = 7.0, 7.0, 1.0, 1.0 Hz, 2H), 5.27 (s, 1H), 5.14 (q, *J* = 1.6 Hz, 1H), 3.40 (s, 3H), 1.67 (s, 3H). <sup>13</sup>C{<sup>1</sup>H} NMR (101 MHz, CDCl<sub>3</sub>) δ 175.3, 174.3, 143.0, 137.1, 131.9, 128.8, 128.5, 122.0, 33.4, 18.6. HRMS (ESI-TOF) Calcd for C<sub>12</sub>H<sub>14</sub>NO<sub>2</sub><sup>+</sup> ([M+H]<sup>+</sup>) 204.2485. Found 204.2481.

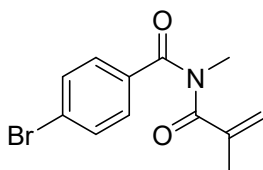

4-Bromo-*N*-methacryloyl-*N*-methylbenzamide (**8f**), white semisolid. <sup>1</sup>H NMR (400 MHz, CDCl<sub>3</sub>) δ 7.62 – 7.48 (m, 2H), 7.43 – 7.30 (m, 2H), 5.31 (s, 1H), 5.21 (q, *J* = 1.6 Hz, 1H), 3.39 (s, 3H), 1.71 (t, *J* = 1.3 Hz, 3H). <sup>13</sup>C{<sup>1</sup>H} NMR (101 MHz, CDCl<sub>3</sub>) δ 174.9, 173.1, 142.7, 135.9, 132.0, 129.9, 126.6, 122.6, 33.5, 18.7. HRMS (ESI-TOF) Calcd for C<sub>12</sub>H<sub>13</sub>BrNO<sub>2</sub><sup>+</sup> ([M+H]<sup>+</sup>) 282.0124. Found 282.0125.

[13] X.-F. Xia, S.-L. Zhu, D. Wang and Y.-M. Liang, *Adv. Synth. Catal.*, 2017, **359**, 859–865.

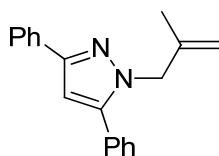

1-(2-Methylallyl)-3,5-diphenyl-1*H*-pyrazole (**12a**), white solid: mp 38 – 39 °C. <sup>1</sup>H NMR (400 MHz, CDCl<sub>3</sub>) δ 7.87 – 7.84 (m, 2H), 7.47 – 7.38 (m, 7H), 7.32 – 7.27 (m, 1H), 6.63 (s, 1H), 4.91 (dd, *J* = 1.4, 1.5 Hz, 1H), 4.69 (s, 2H), 4.57 (s, 1H), 1.71 (s, 3H). <sup>13</sup>C{<sup>1</sup>H} NMR (101 MHz, CDCl<sub>3</sub>) δ 150.8, 145.4, 141.7, 133.5, 130.8, 128.7, 128.62, 128.60, 127.6, 125.7, 112.2, 103.4, 55.2, 20.2. HRMS (ESI-TOF) Calcd for C<sub>19</sub>H<sub>19</sub>N<sub>2</sub><sup>+</sup> ([M+H]<sup>+</sup>) 275.1543. Found 275.1540.

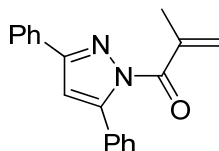

1-(3,5-Diphenyl-1*H*-pyrazol-1-yl)-2-methylprop-2-en-1-one (**12b**), colorless oil. <sup>1</sup>H NMR (400 MHz, CDCl<sub>3</sub>) δ 7.89 – 7.86 (m, 2H), 7.46 – 7.36 (m, 9H), 6.79 (s, 1H), 6.09 (t, *J* = 1.1 Hz, 1H), 5.88 (p, *J* = 1.5 Hz, 1H), 2.18 (t, *J* = 1.2 Hz, 3H). <sup>13</sup>C{<sup>1</sup>H} NMR (101 MHz, CDCl<sub>3</sub>) δ 168.8, 153.4, 148.1, 138.8, 131.9, 130.8, 129.1, 128.78, 128.77, 128.4, 128.31, 128.28, 126.3, 108.8, 19.7. HRMS (ESI-TOF) Calcd for C<sub>19</sub>H<sub>17</sub>N<sub>2</sub>O<sup>+</sup> ([M+H]<sup>+</sup>) 289.1335. Found 289.1339.

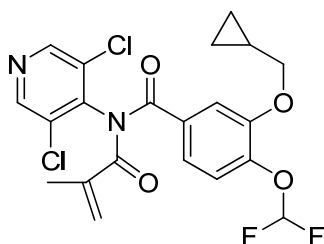

3-(Cyclopropylmethoxy)-*N*-(3,5-dichloropyridin-4-yl)-4-(difluoromethoxy)-*N*-methacryloylbenzamide (**14**), colorless oil. <sup>1</sup>H NMR (400 MHz, CDCl<sub>3</sub>) δ 8.59 (s, 2H), 7.35 – 7.30 (m, 2H), 7.16 (d, *J* = 8.3 Hz, 1H), 6.71 (t, *J* = 74.6 Hz, 1H), 5.79 (d, *J* = 1.2 Hz, 1H), 5.49 (q, *J* = 1.5 Hz, 1H), 3.88 (d, *J* = 7.0 Hz, 2H), 1.94 (s, 3H), 1.30 – 1.23 (m, 1H), 0.67 – 0.62 (m, 2H), 0.37 – 0.33 (m, 2H). <sup>13</sup>C{<sup>1</sup>H} NMR (101 MHz, CDCl<sub>3</sub>) δ 172.0, 170.3, 150.5, 149.0, 143.98, 143.95, 143.91, 143.1, 140.4, 132.3, 131.4, 123.9, 121.72, 121.69, 115.6 (t, *J* = 1039.0 Hz), 114.6, 74.0, 18.5, 9.9, 3.2. <sup>19</sup>F NMR (376 MHz, CDCl<sub>3</sub>) δ -81.98 (d, *J* = 74.4 Hz, 2F). HRMS (ESI-TOF) Calcd for C<sub>21</sub>H<sub>18</sub>Cl<sub>2</sub>F<sub>2</sub>N<sub>2</sub>O<sub>4</sub><sup>+</sup> ([M+H]<sup>+</sup>) 470.0612. Found 470.0611.

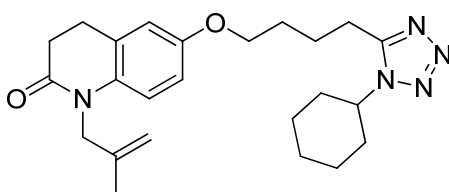

6-(4-(1-Cyclohexyl-1*H*-tetrazol-5-yl)butoxy)-1-(2-methylallyl)-3,4-dihydroquinolin-2(1*H*)-one (**16**), yellowish oil.  $^1\text{H}$  NMR (400 MHz,  $\text{CDCl}_3$ )  $\delta$  6.84 (d,  $J = 8.5$  Hz, 1H), 6.71 (d,  $J = 8.9$  Hz, 2H), 4.87 (p,  $J = 1.5$  Hz, 1H), 4.70 (s, 1H), 4.43 (s, 2H), 4.20 – 4.12 (m, 1H), 3.99 (t,  $J = 6.0$  Hz, 2H), 2.96 – 2.87 (m, 4H), 2.69 – 2.65 (m, 2H), 2.07 – 1.98 (m, 7H), 1.95 – 1.87 (m, 3H), 1.75 (s, 4H), 1.46 – 1.30 (m, 3H).  $^{13}\text{C}\{^1\text{H}\}$  NMR (101 MHz,  $\text{CDCl}_3$ )  $\delta$  169.6, 154.4, 153.6, 139.7, 133.4, 127.7, 116.5, 114.2, 112.5, 110.6, 67.4, 57.5, 48.0, 32.9, 31.7, 28.5, 25.8, 25.2, 24.8, 24.0, 22.9, 20.0. HRMS (ESI-TOF) Calcd for  $\text{C}_{24}\text{H}_{34}\text{N}_5\text{O}_2^+$  ( $[\text{M}+\text{H}]^+$ ) 424.2707. Found 424.2715.

## VII. Copies of NMR spectra for products and new compounds

### 3a, <sup>1</sup>H NMR

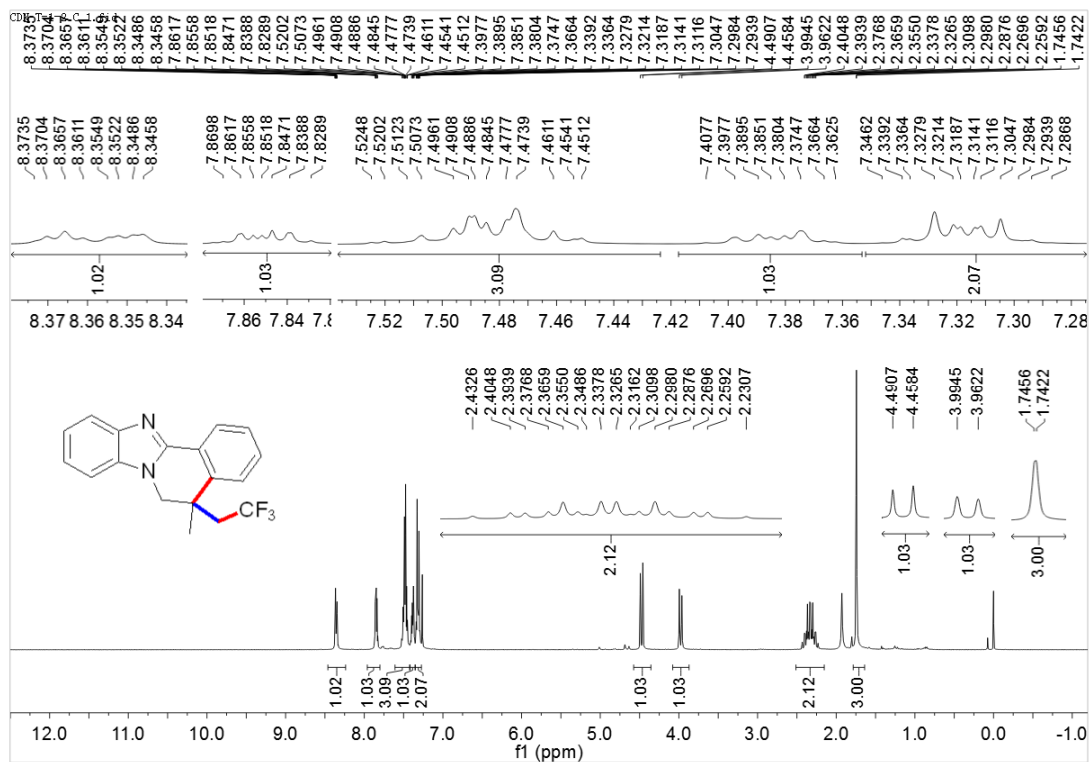

### <sup>13</sup>C NMR

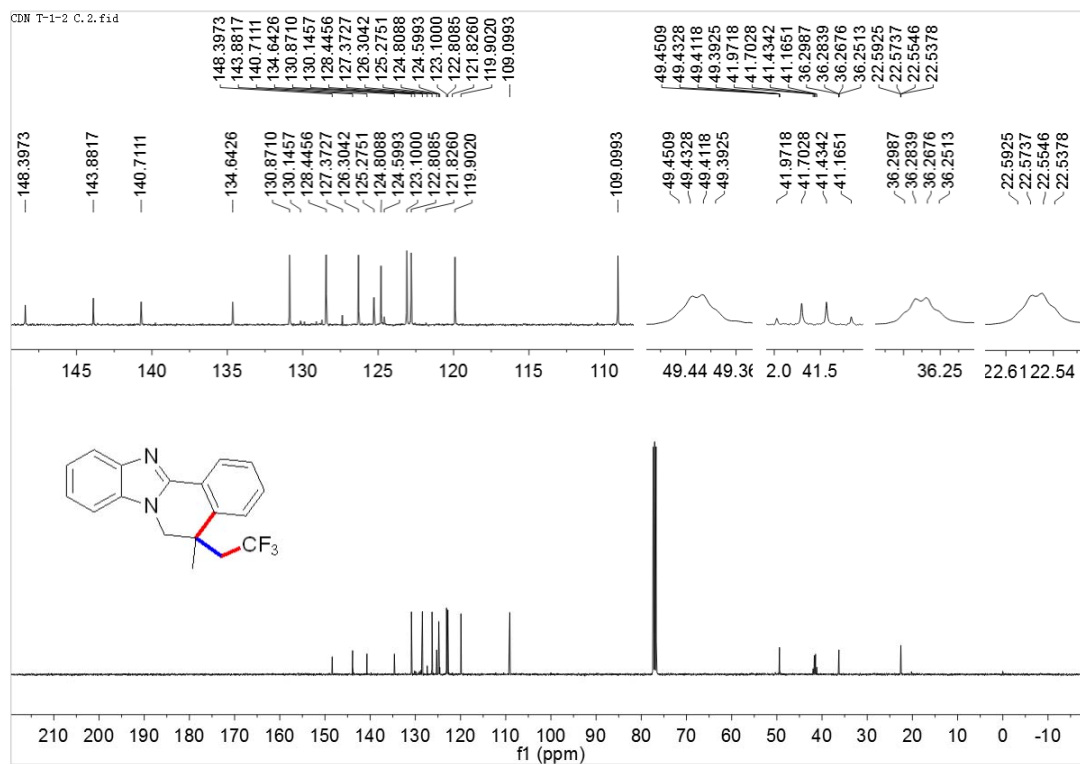



### DEPT 90 and DEPT 135

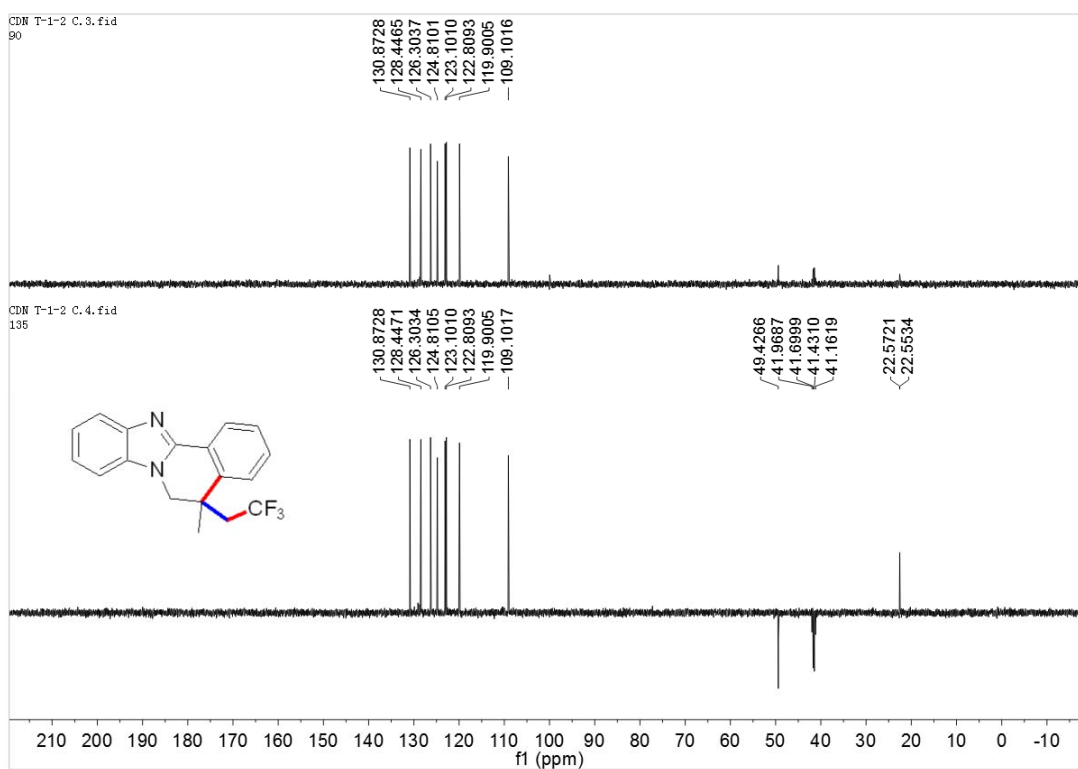

### <sup>19</sup>F NMR

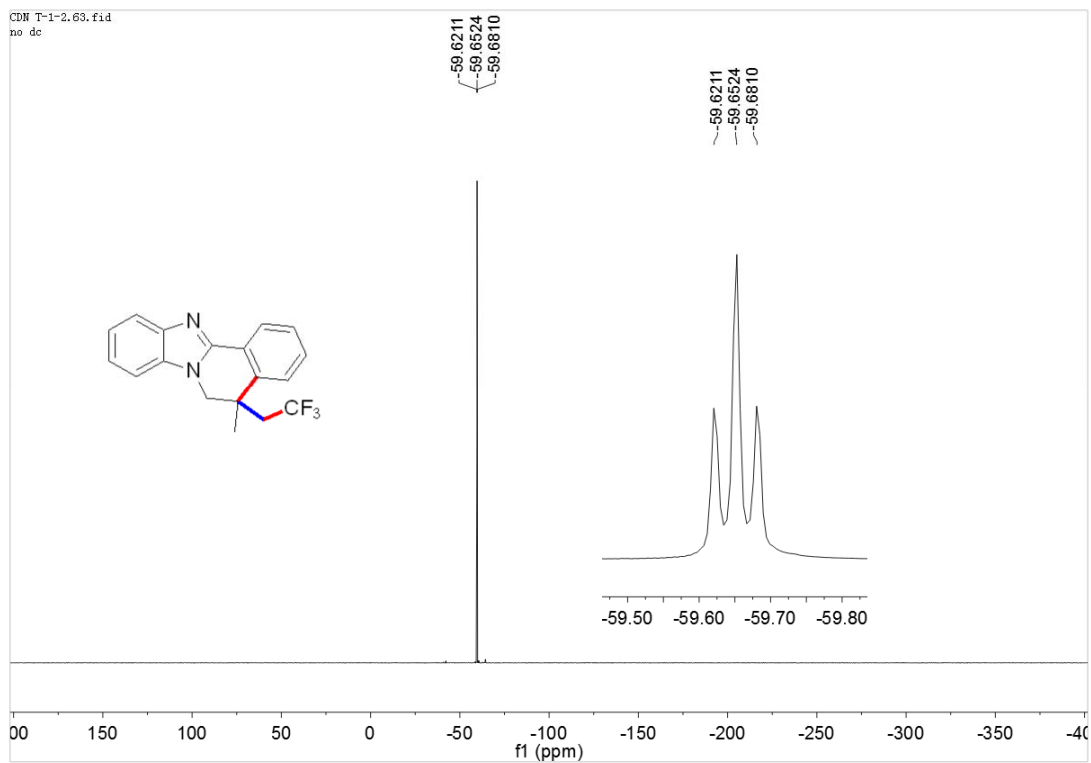

### 3b, <sup>1</sup>H NMR

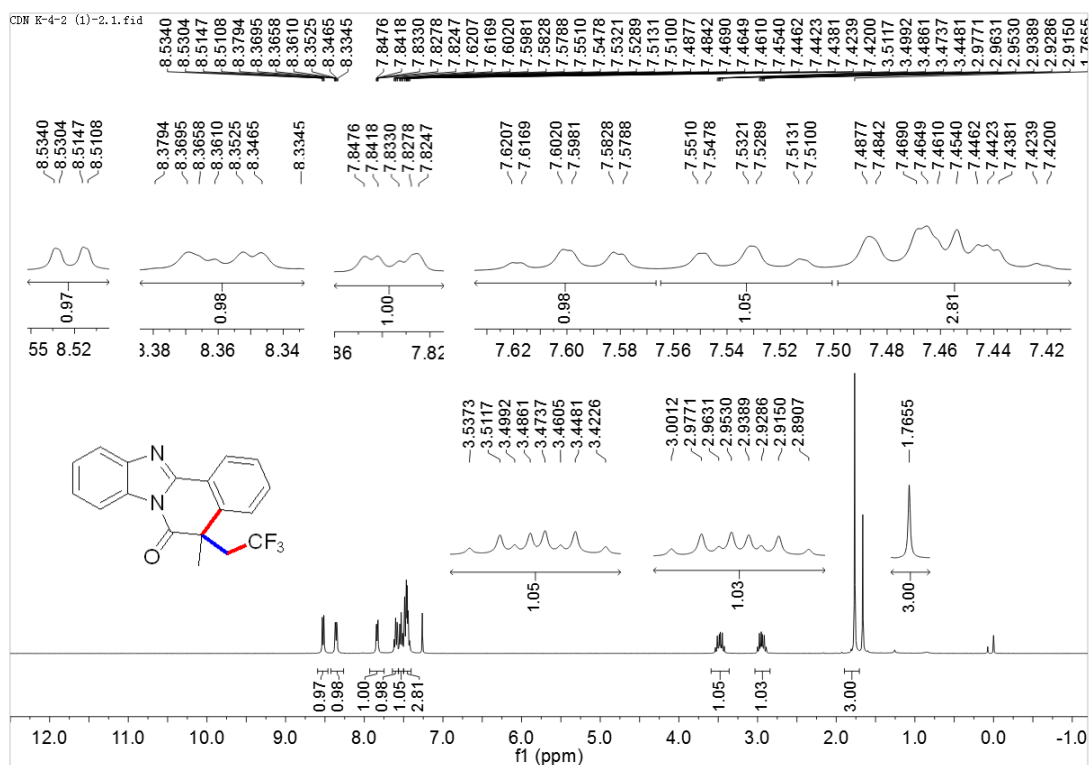

### <sup>13</sup>C NMR

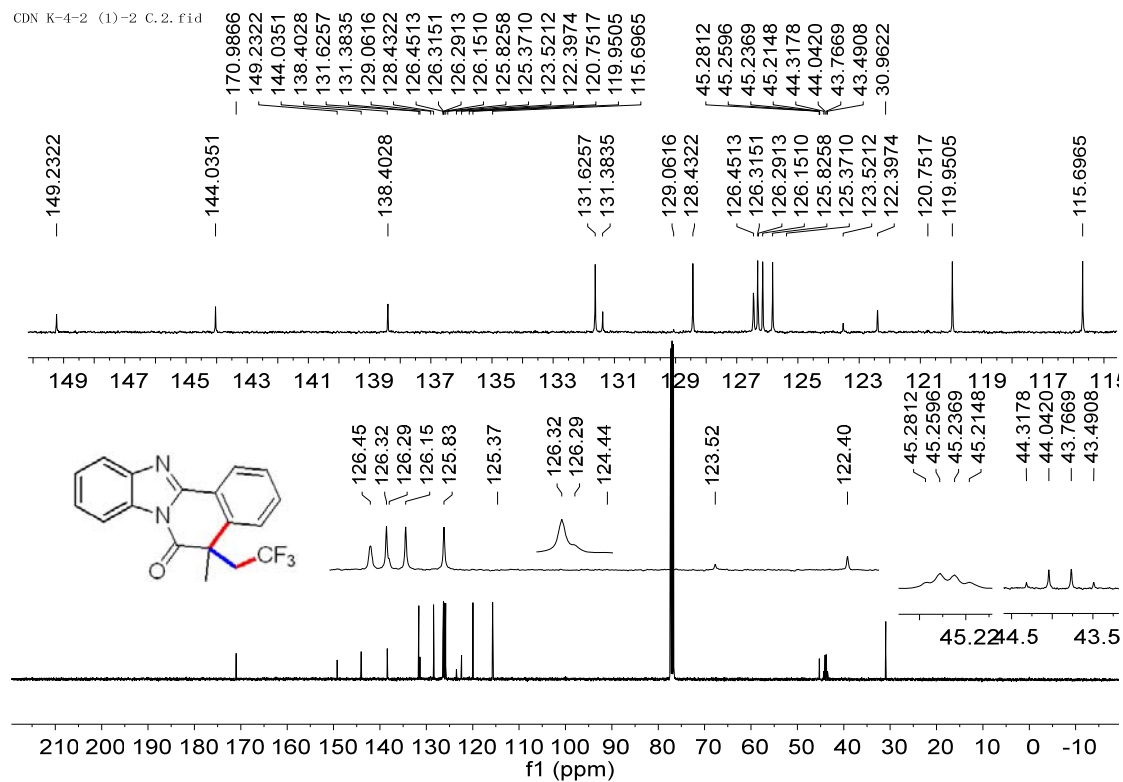

## DEPT 90 and DEPT 135

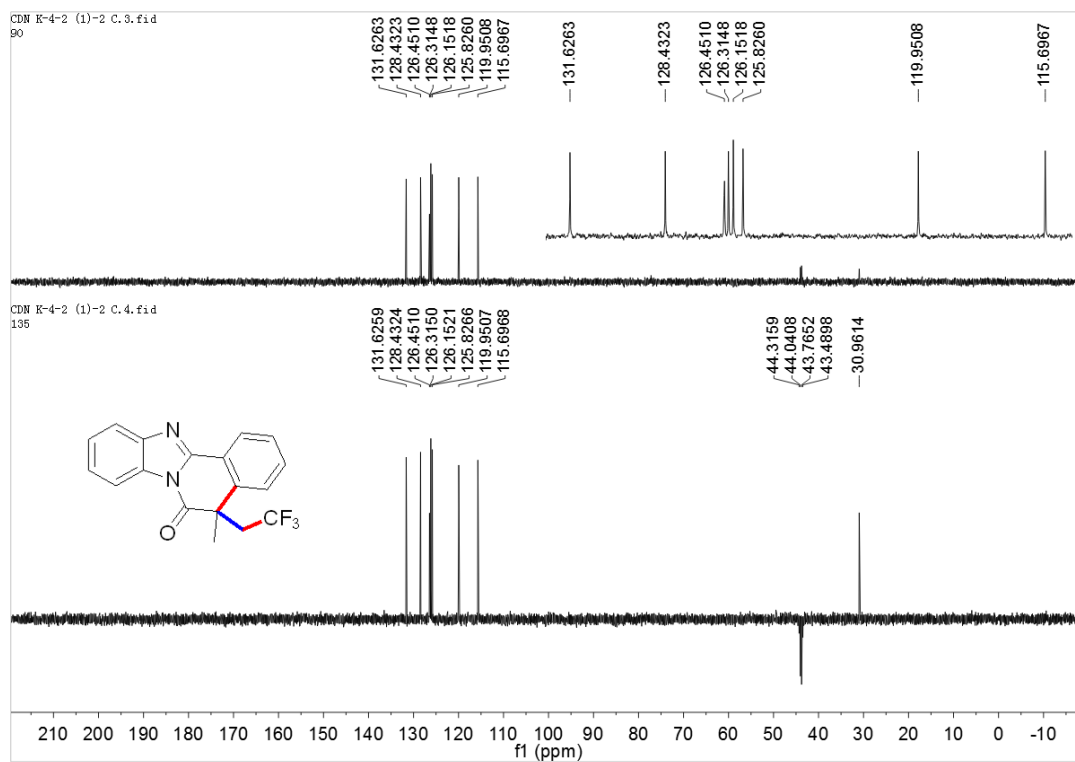

## $^{19}\text{F}$ NMR

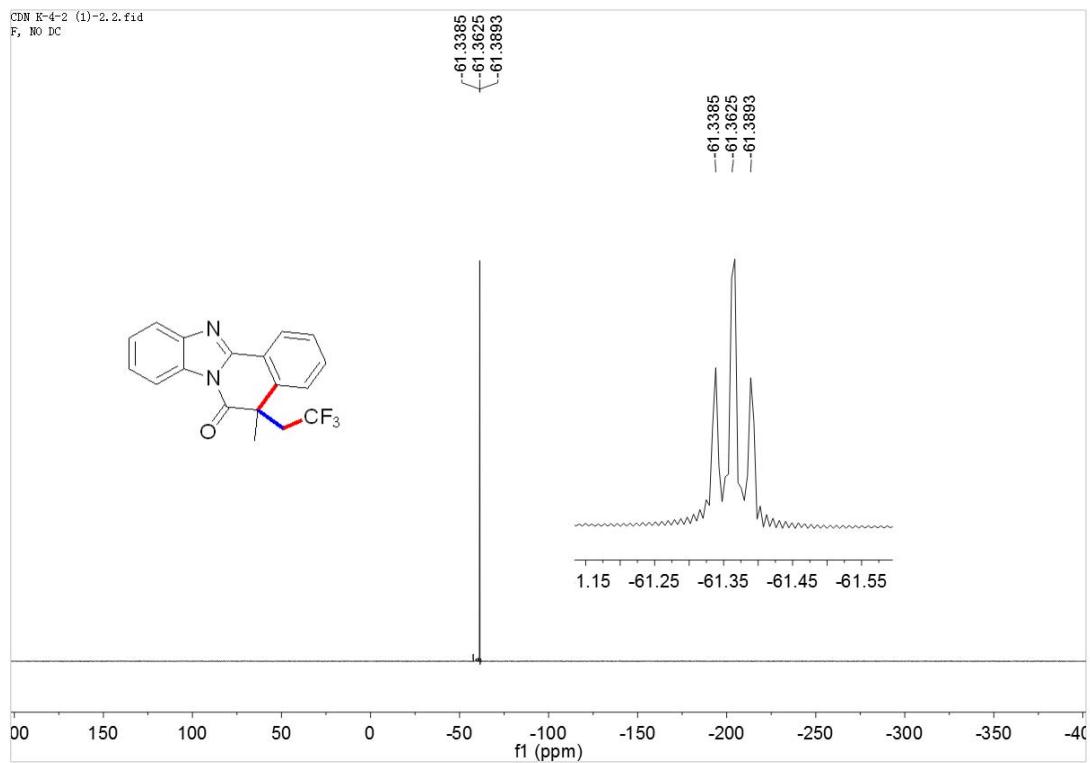

3c1, <sup>1</sup>H NMR

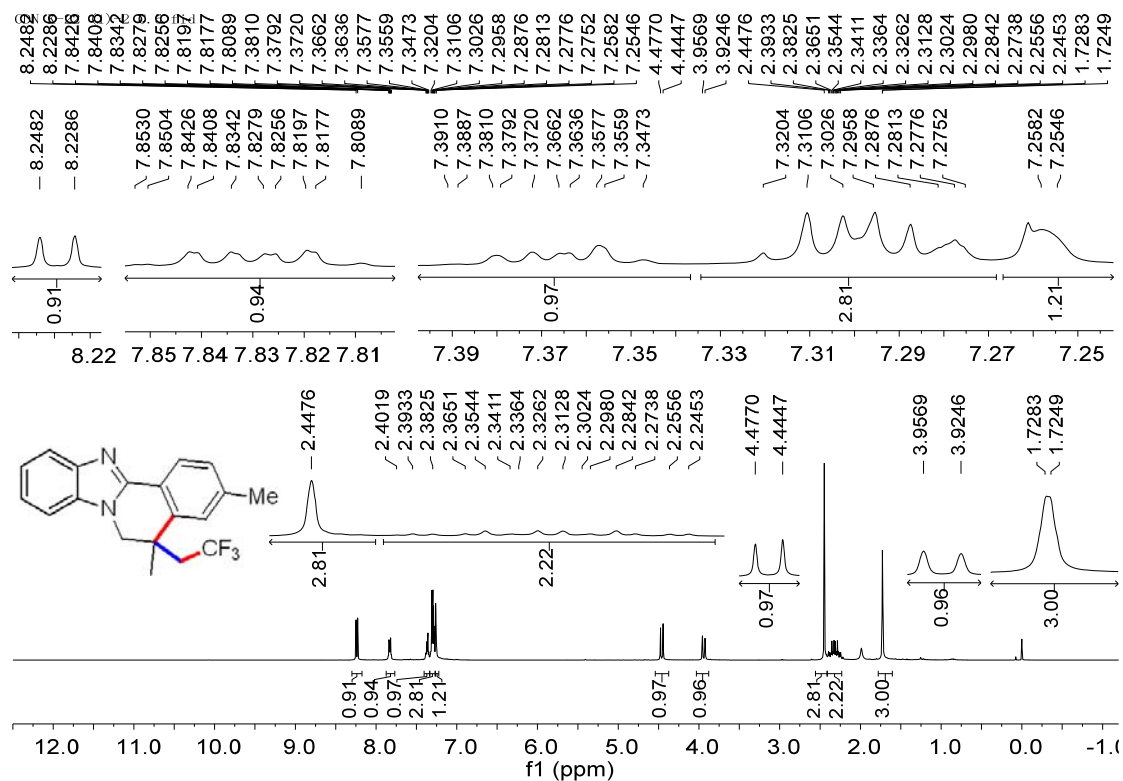

<sup>13</sup>C NMR

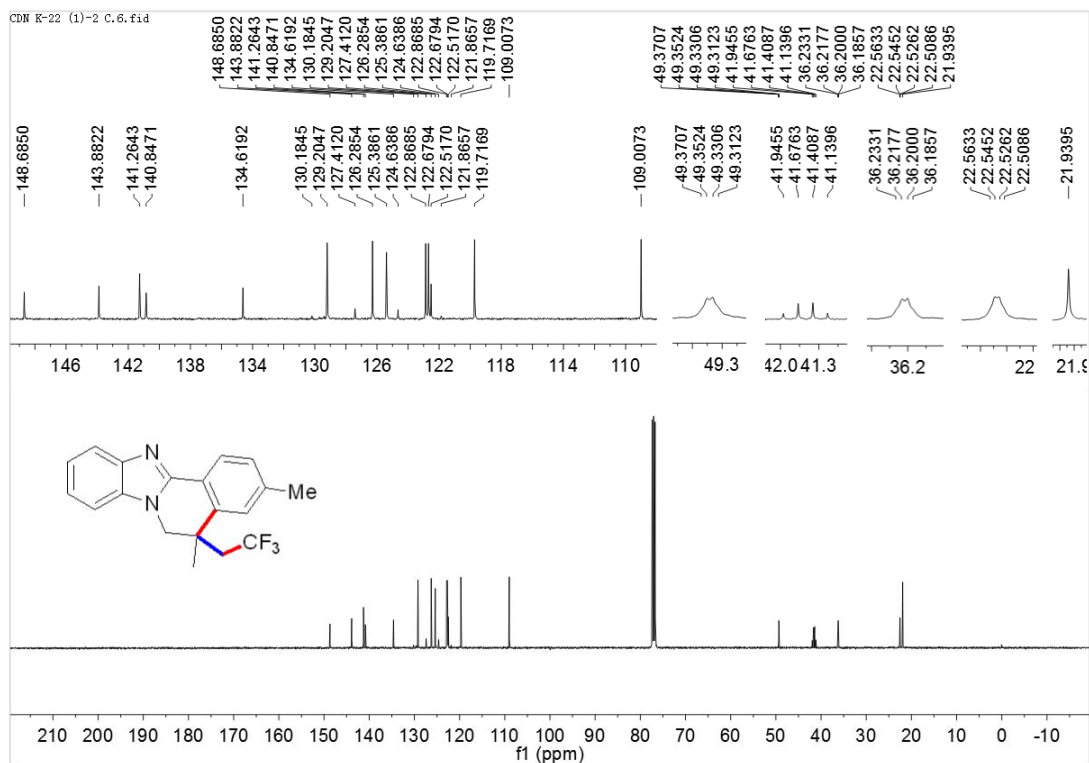

### DEPT 90 and DEPT 135

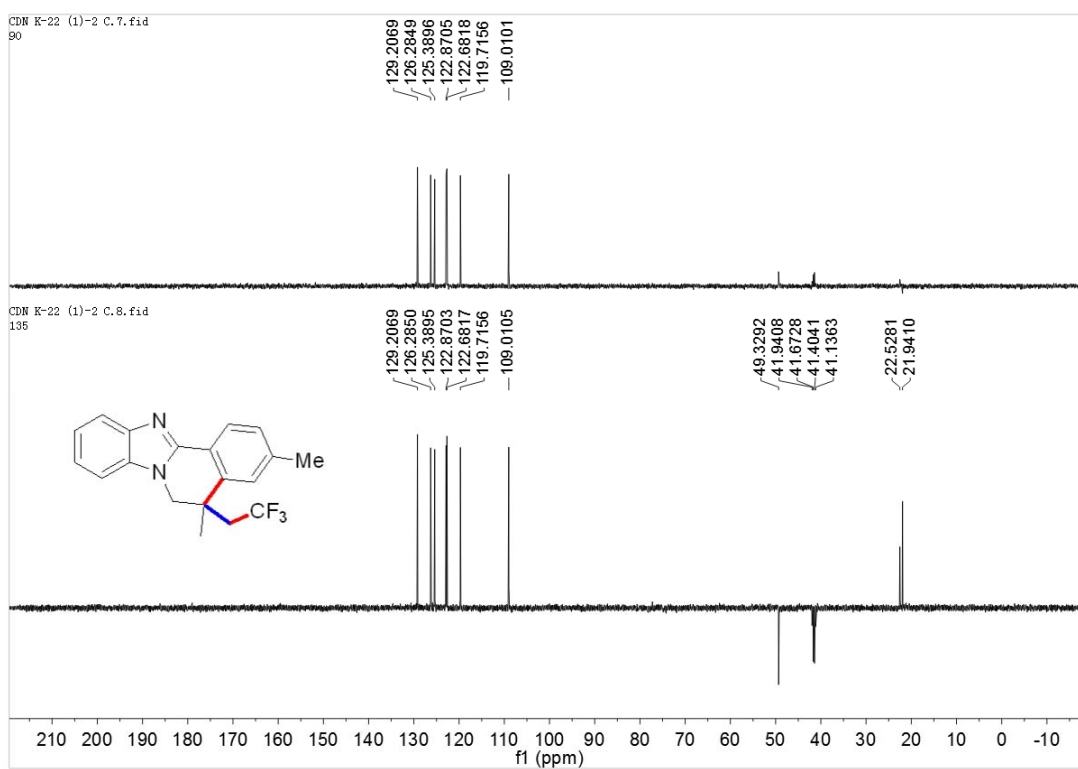

### <sup>19</sup>F NMR

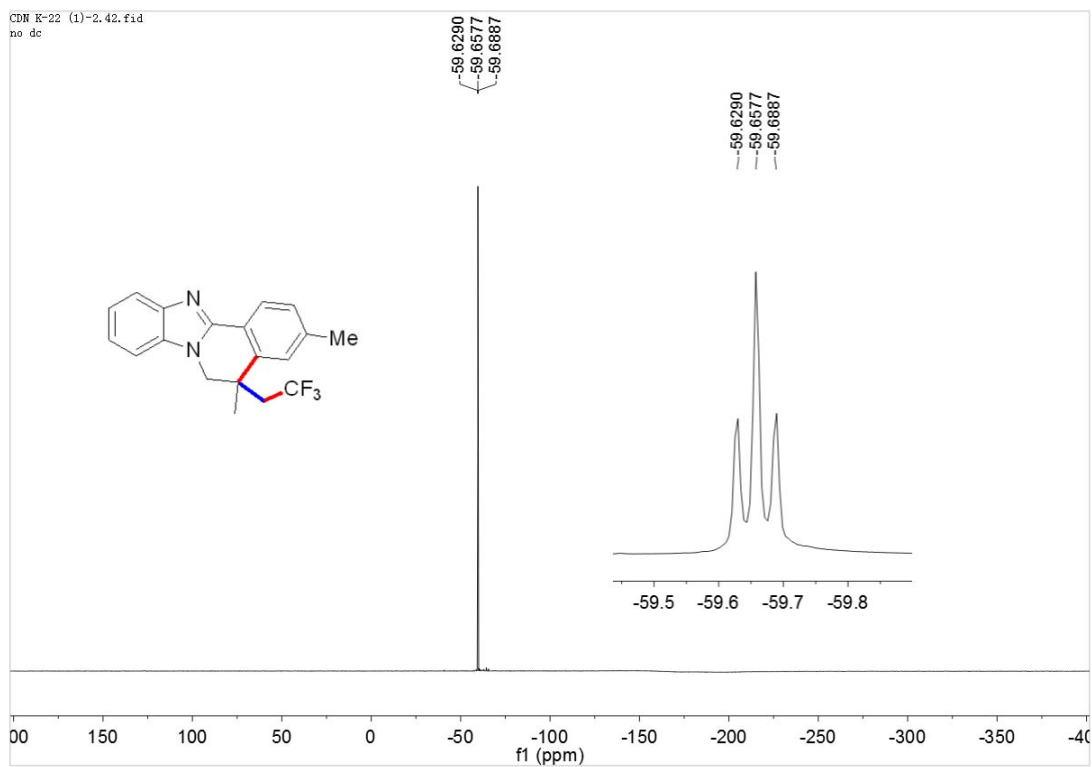



## DEPT 90 and DEPT 135

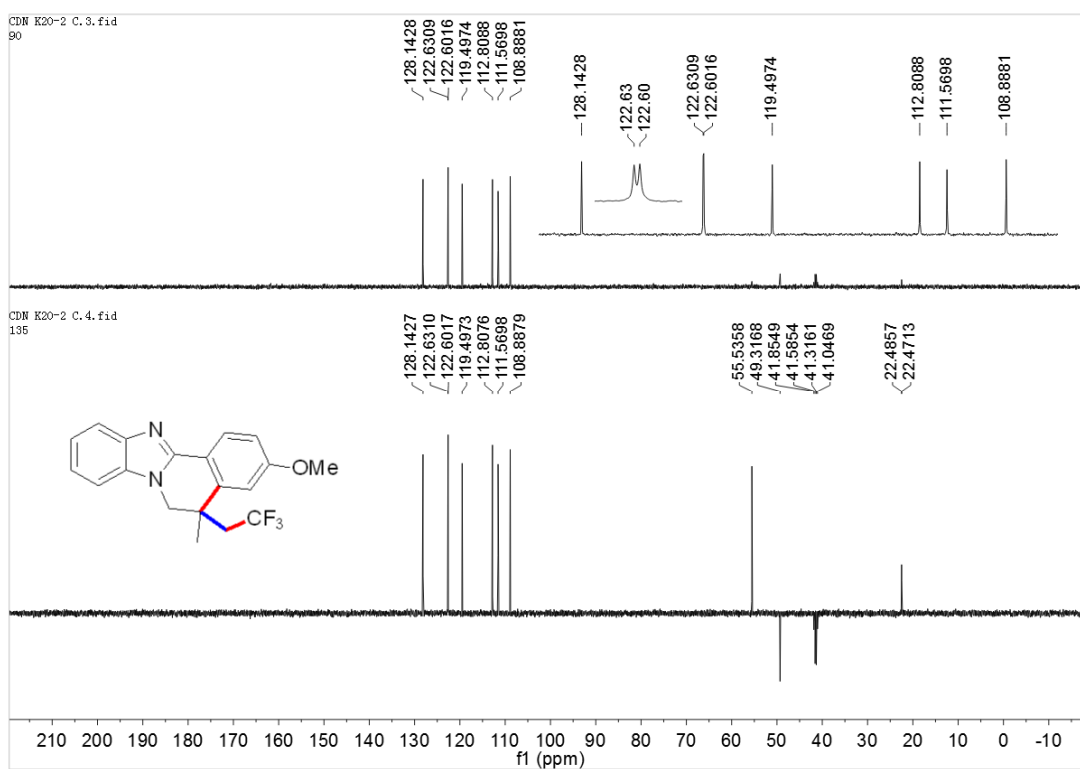

## <sup>19</sup>F NMR

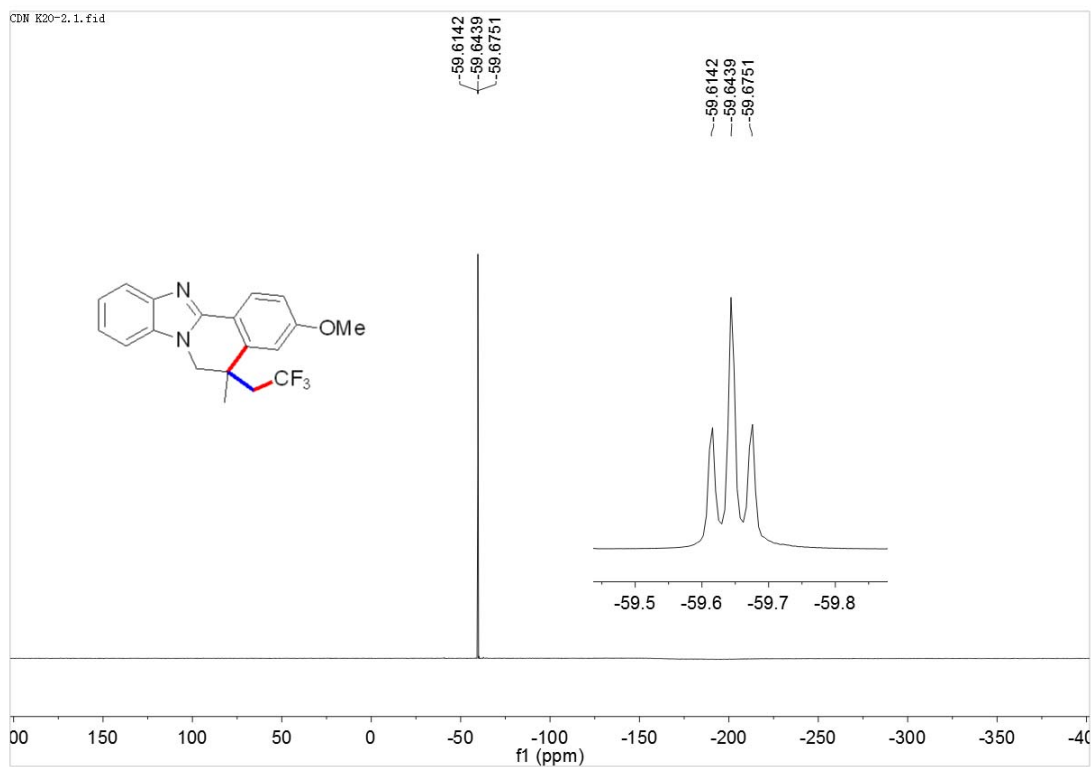

### 3c3, <sup>1</sup>H NMR

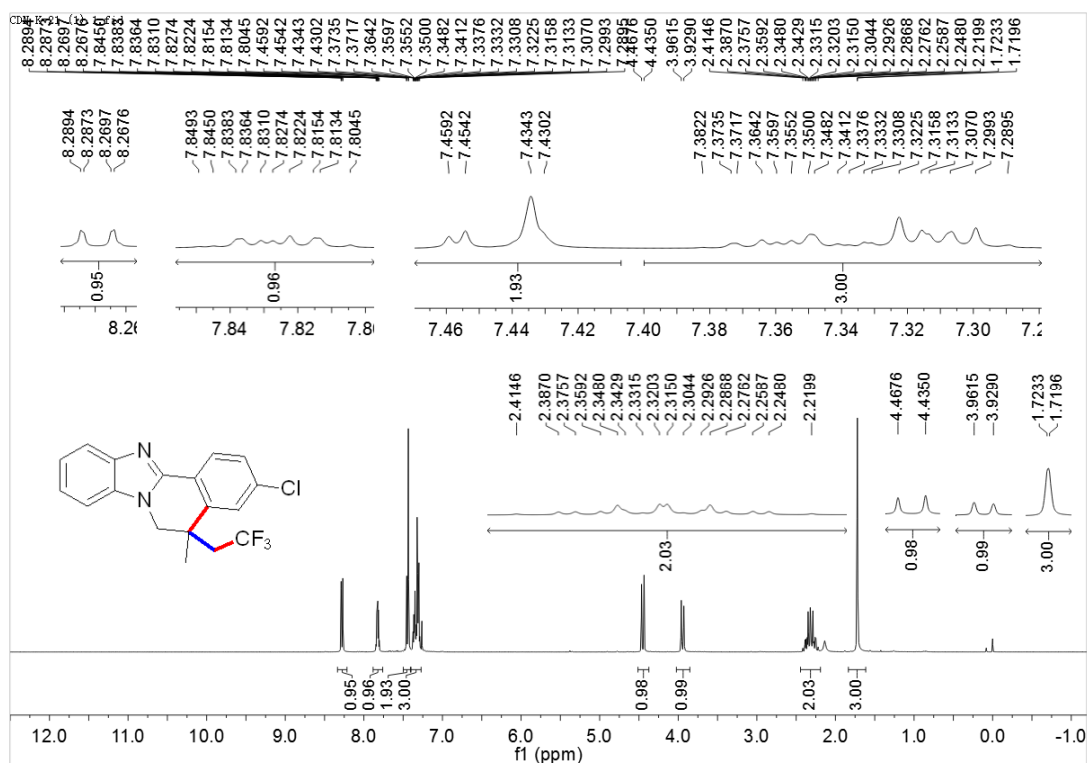

### <sup>13</sup>C NMR

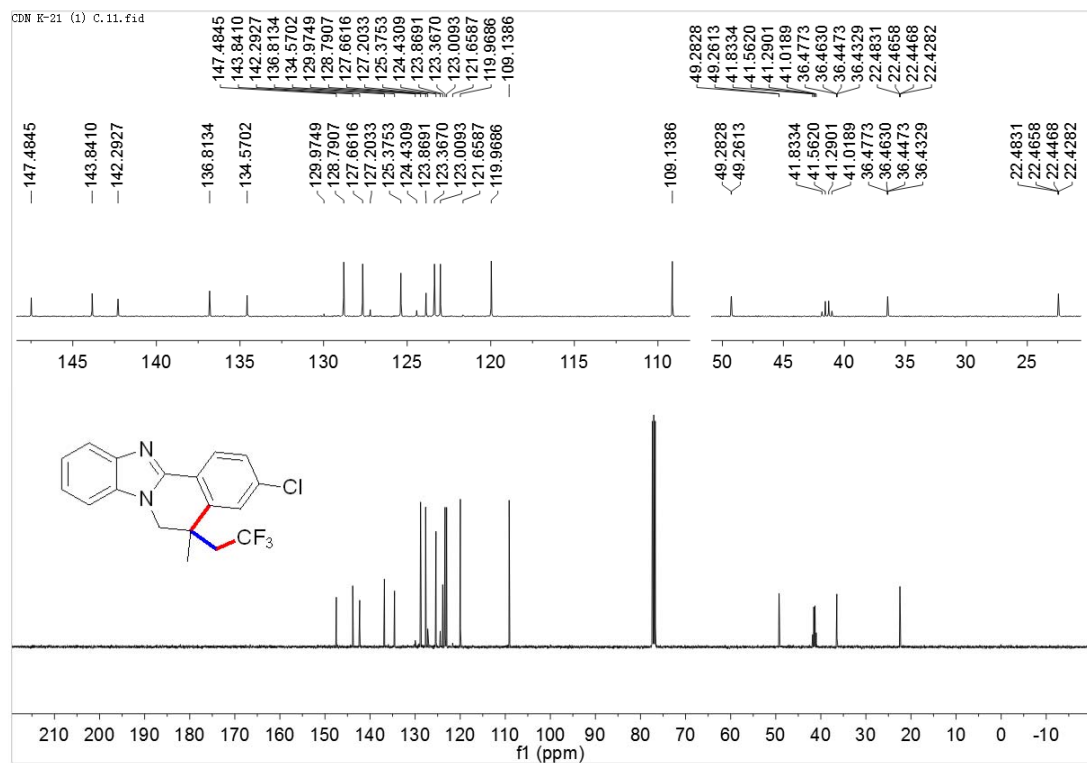



### DEPT 90 and DEPT 135

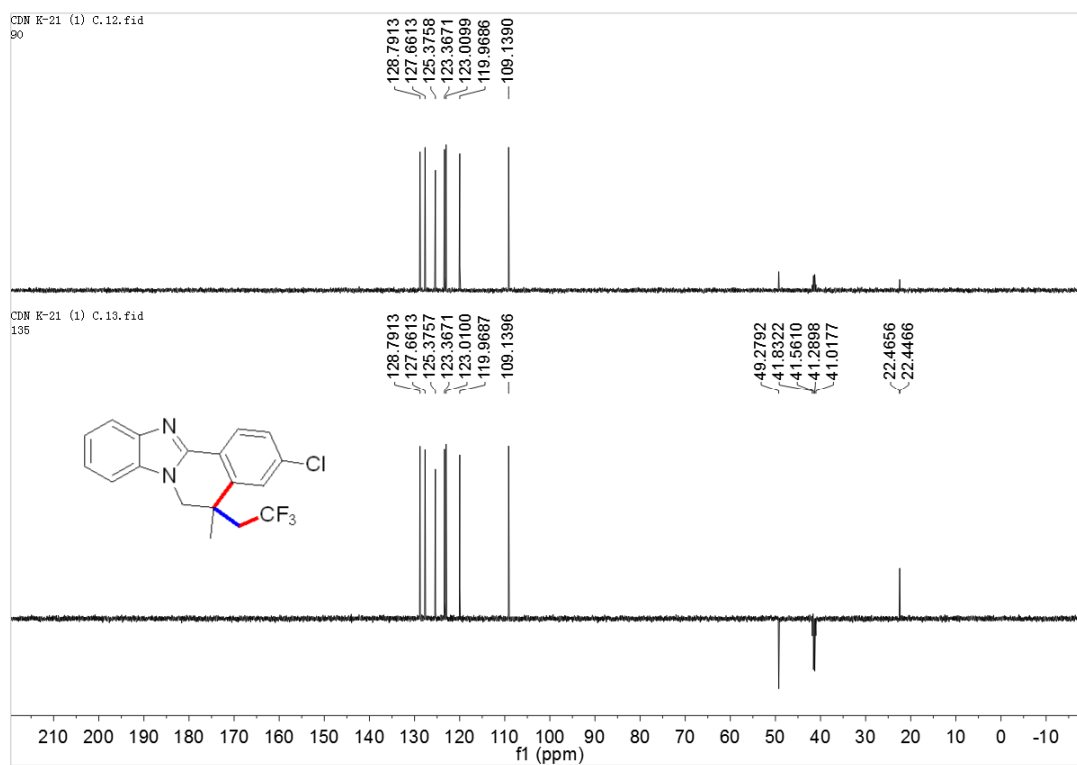

### <sup>19</sup>F NMR

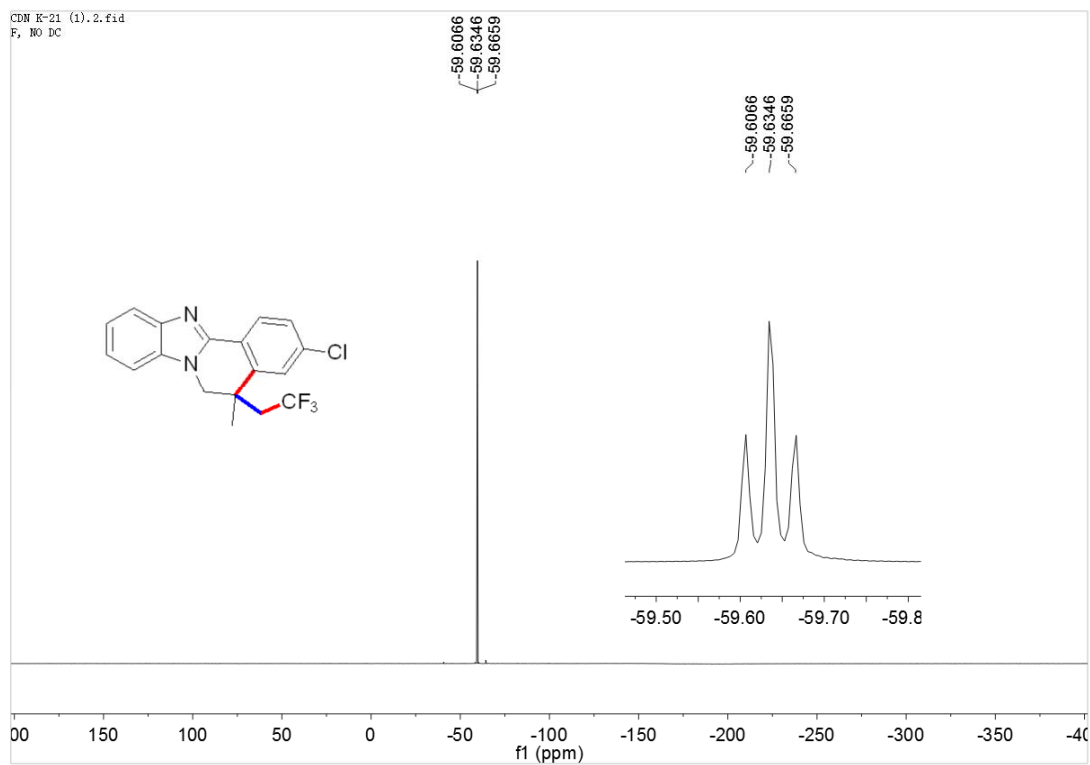

### 3c4, <sup>1</sup>H NMR

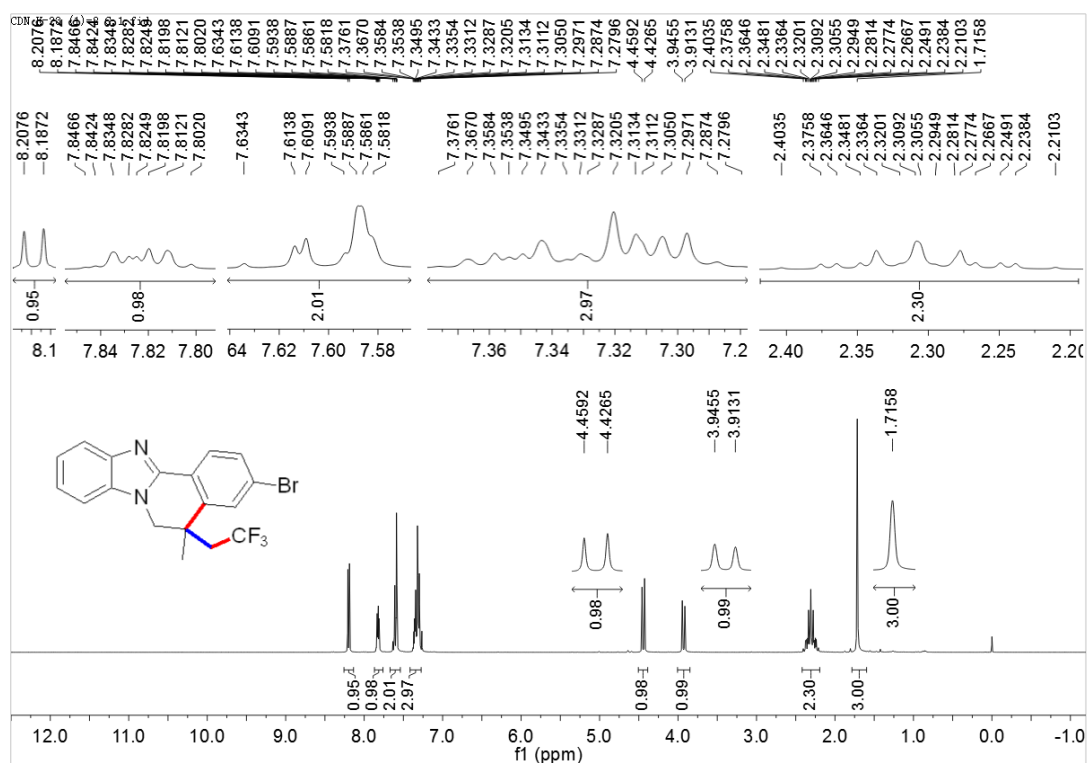

### <sup>13</sup>C NMR

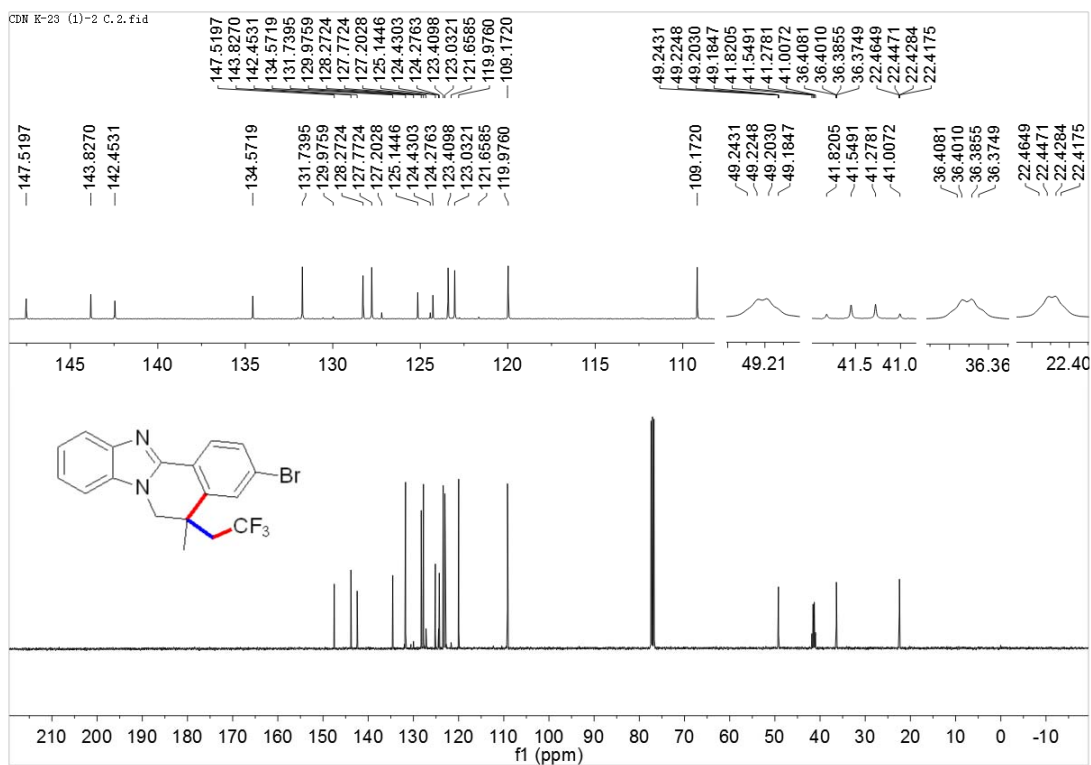

### DEPT 90 and DEPT 135

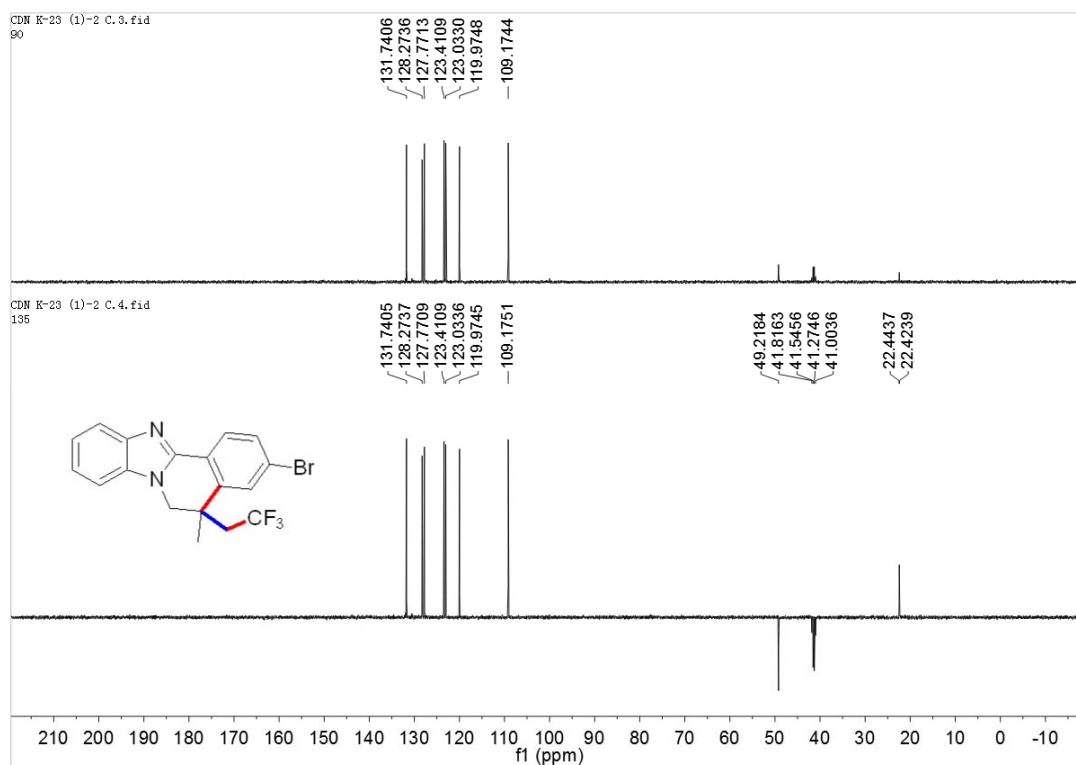

### <sup>19</sup>F NMR

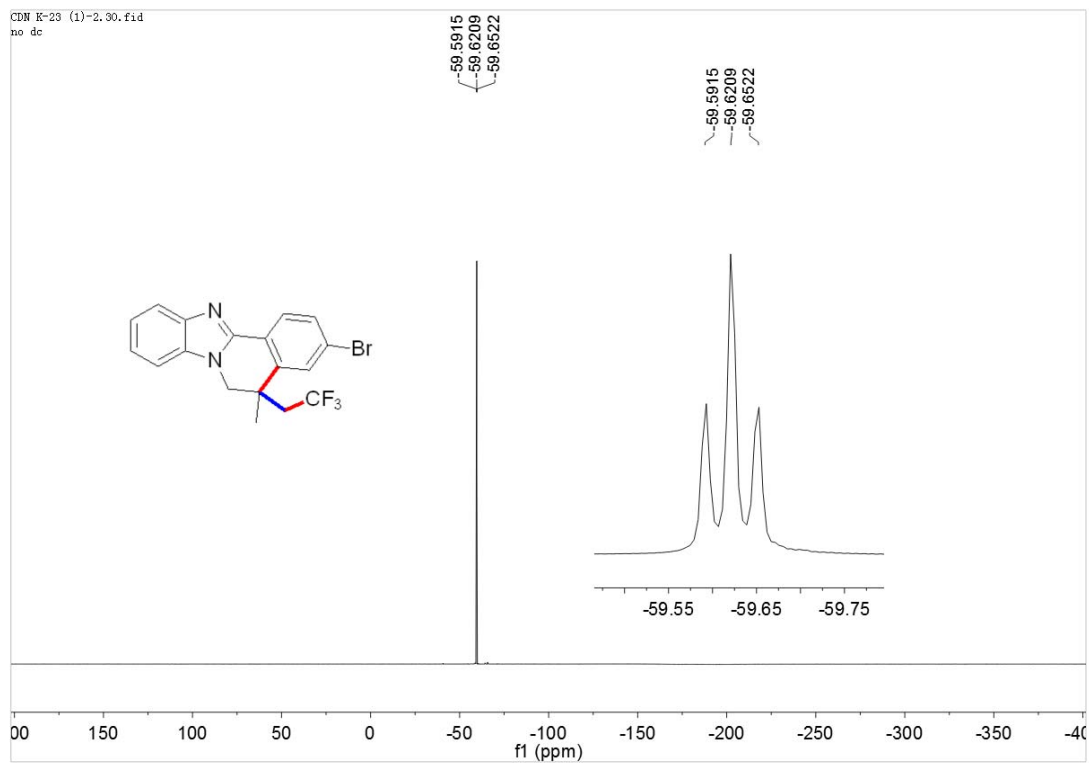

### 3c5, <sup>1</sup>H NMR

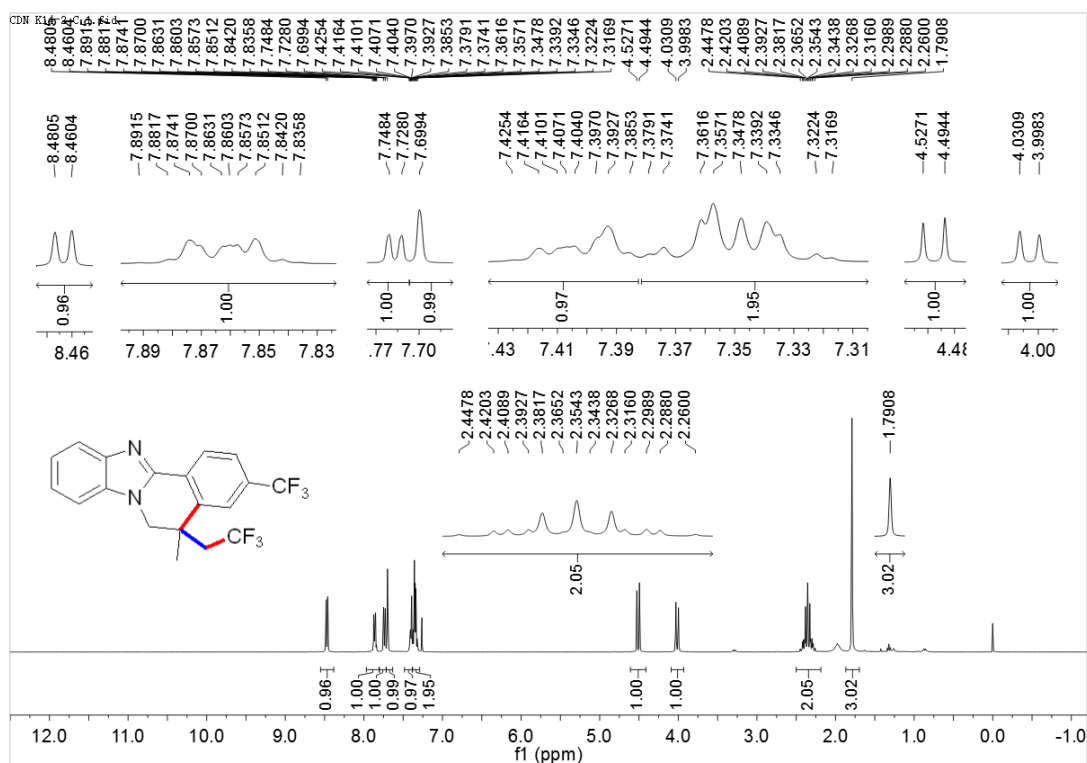

### <sup>13</sup>C NMR

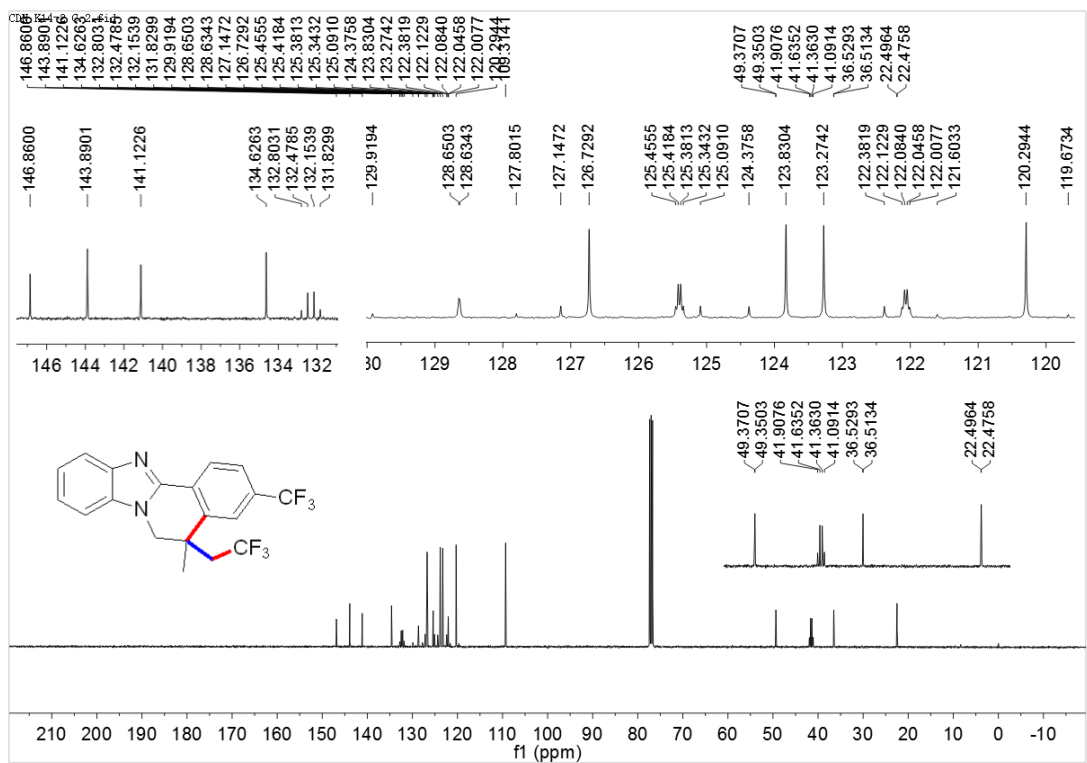

### DEPT 90 and DEPT 135

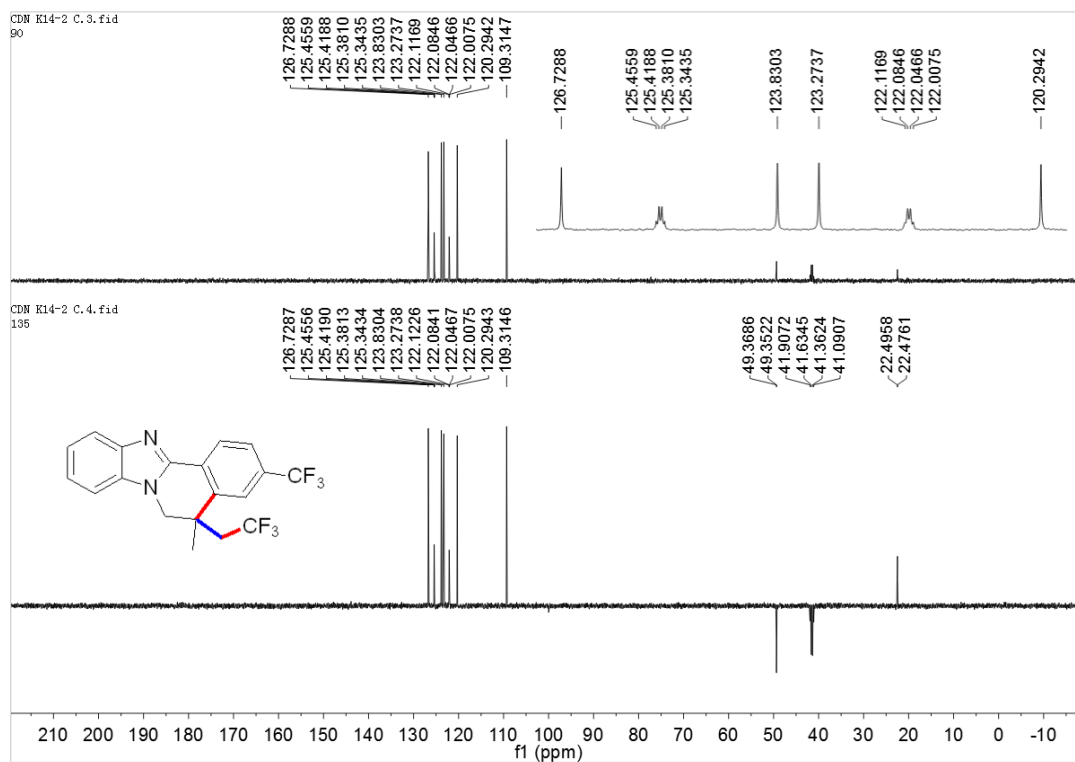

### <sup>19</sup>F NMR

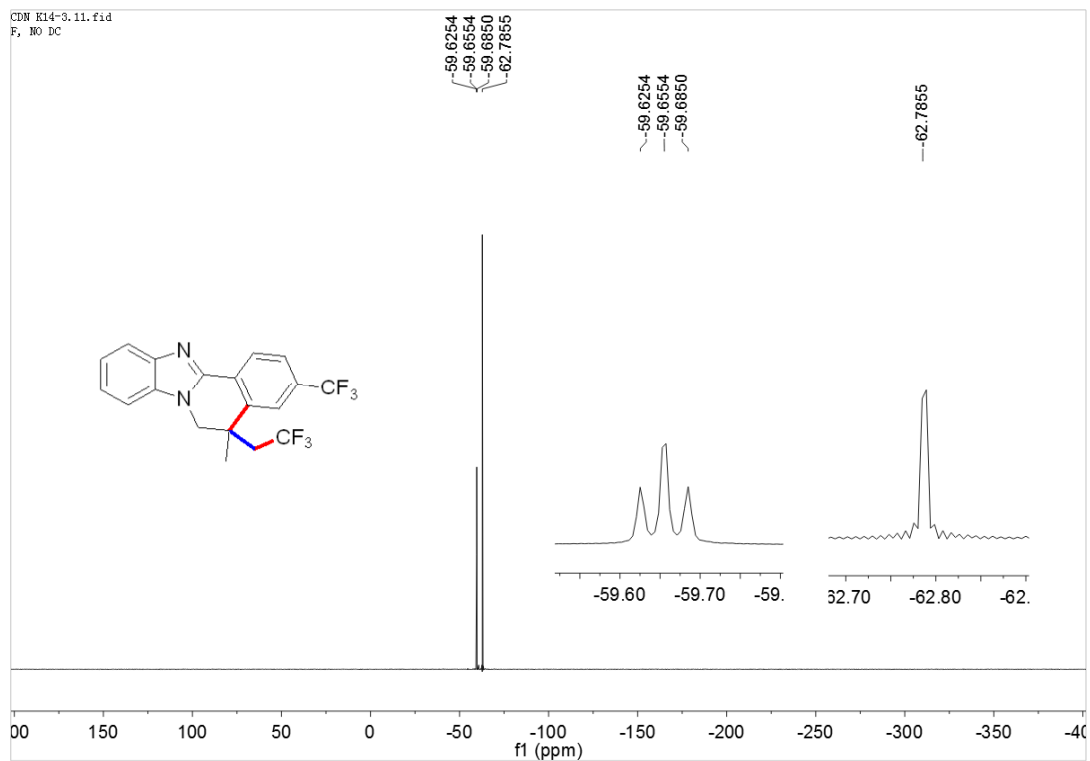

**3c6, <sup>1</sup>H NMR**

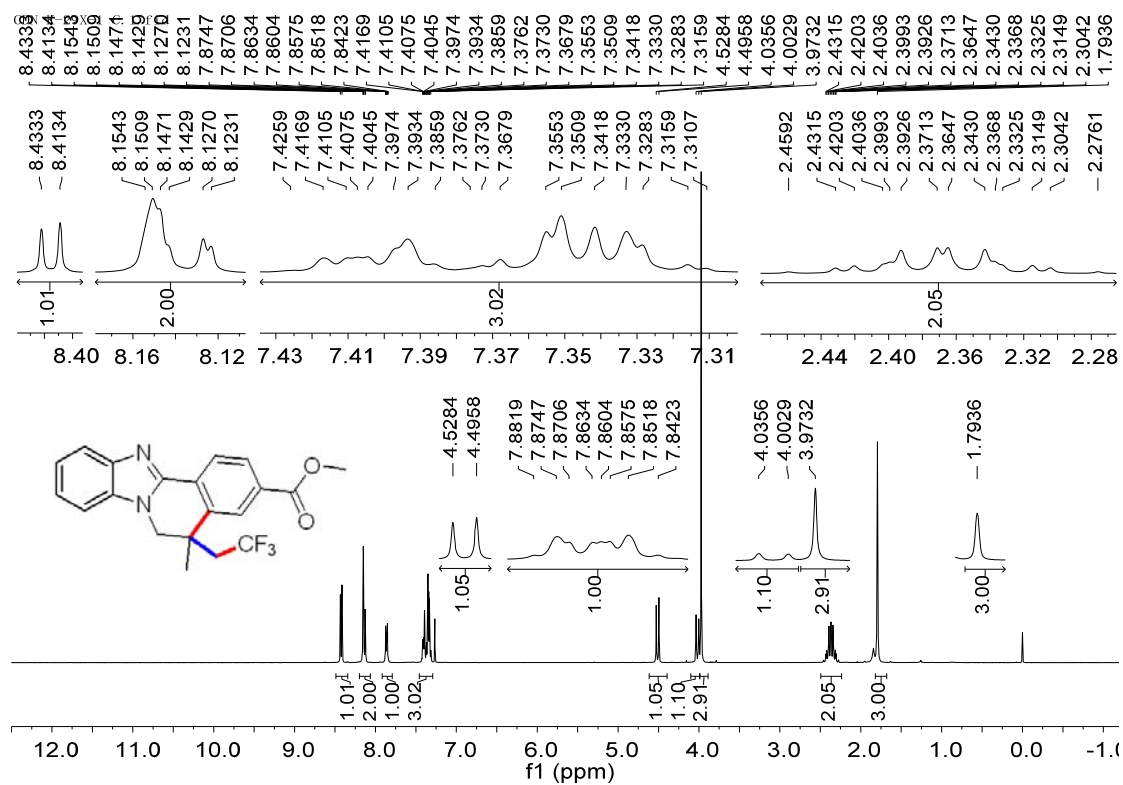

**<sup>13</sup>C NMR**

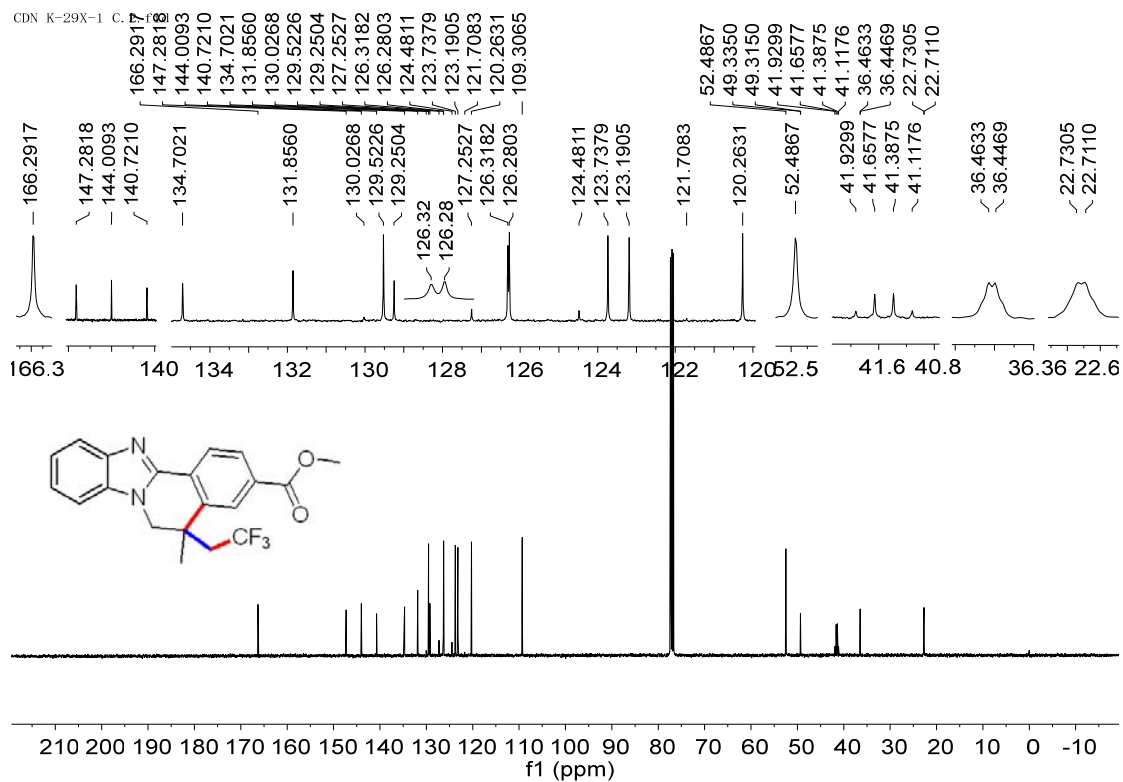

### DEPT 90 and DEPT 135

CDN K-29X-1 C. 3. fid  
90

129.5231  
126.3191  
126.2800  
123.7385  
123.1915  
120.2625  
109.3071

129.5231  
126.3191  
126.2800  
123.7385  
123.1915  
120.2625  
109.3071

CDN K-29X-1 C. 4. fid  
135

129.5234  
126.3188  
126.2801  
123.7382  
123.1906  
120.2622  
109.3072

52.4855  
49.3166  
41.9275  
41.6566  
41.3852  
41.1143  
22.7168

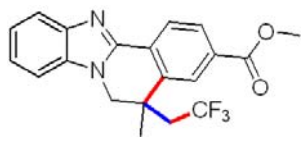

210 200 190 180 170 160 150 140 130 120 110 100 90 80 70 60 50 40 30 20 10 0 -10  
f1 (ppm)

### <sup>19</sup>F NMR

CDN K-29X-1. 1. fid

-59.5967  
-59.6253  
-59.6550

-59.5967  
-59.6253  
-59.6550

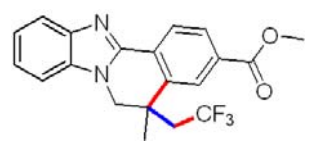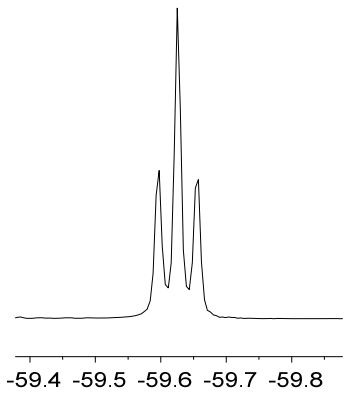

00 150 100 50 0 -50 -100 -150 -200 -250 -300 -350 -4  
f1 (ppm)

### 3d, <sup>1</sup>H NMR

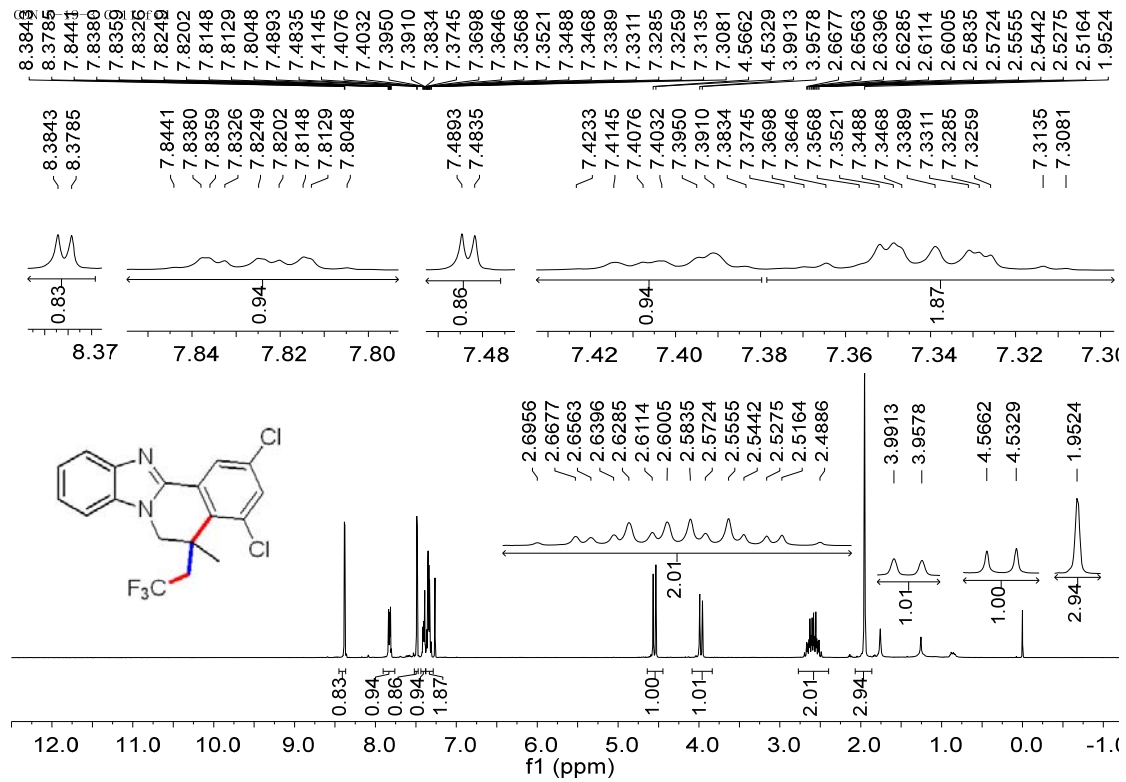

### <sup>13</sup>C NMR

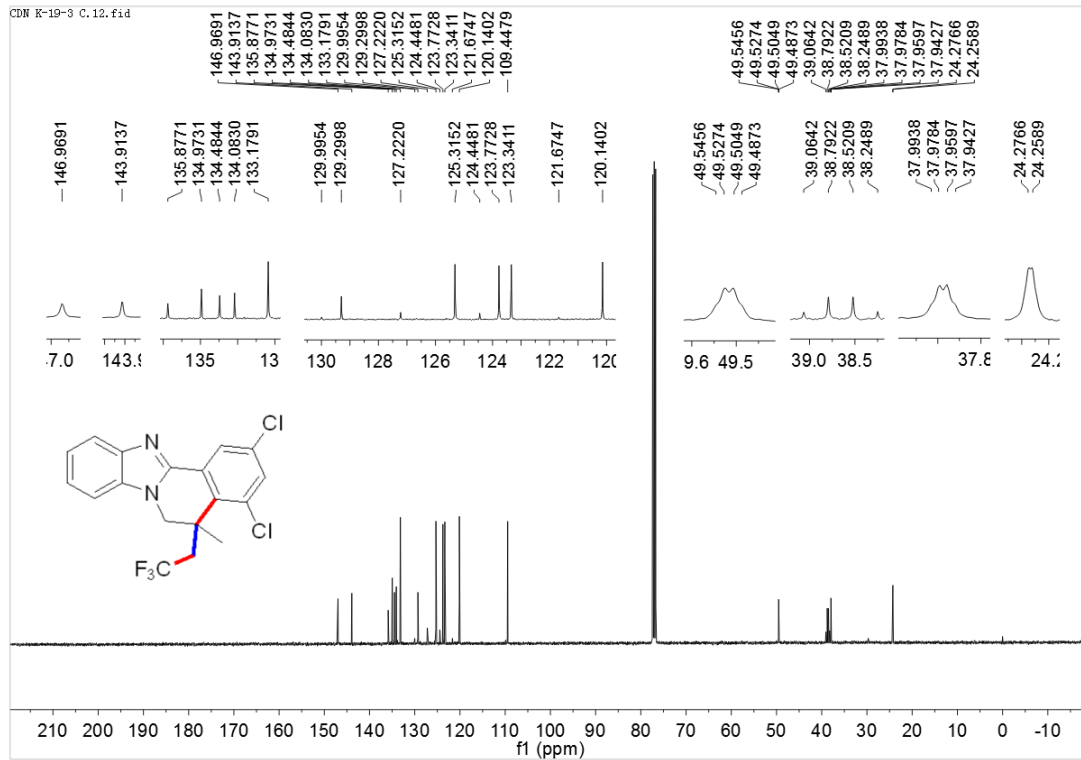



### DEPT 90 and DEPT 135

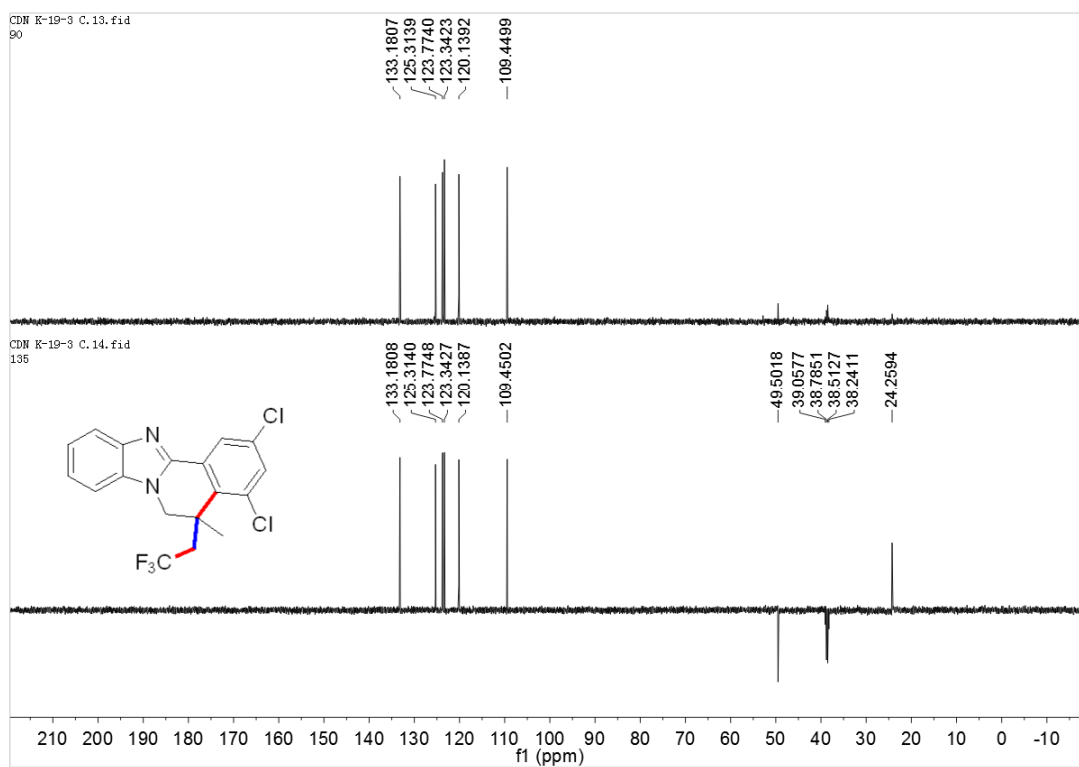

### <sup>19</sup>F NMR

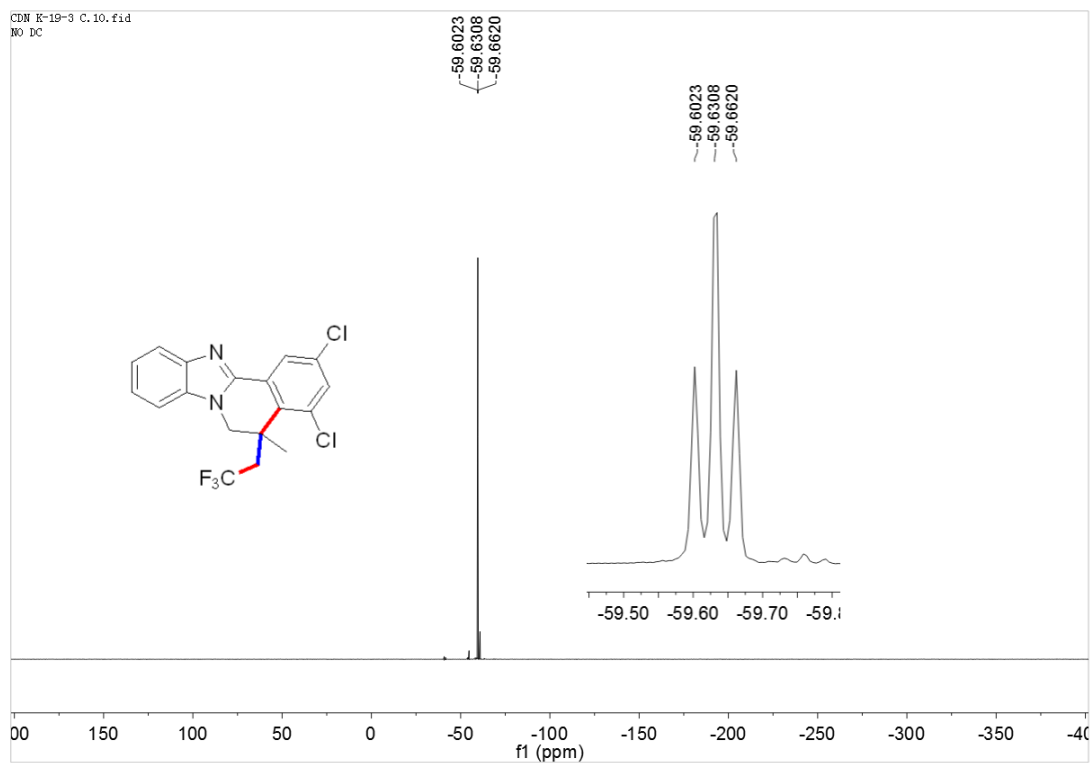

### 3e, <sup>1</sup>H NMR

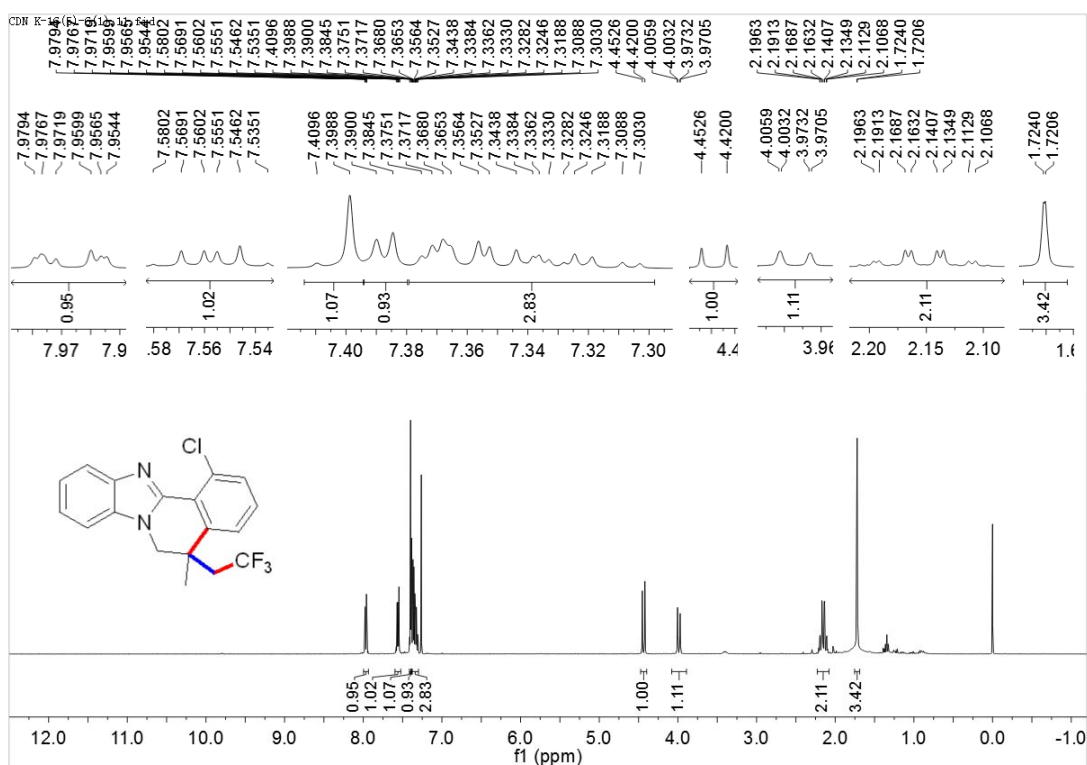

### <sup>13</sup>C NMR

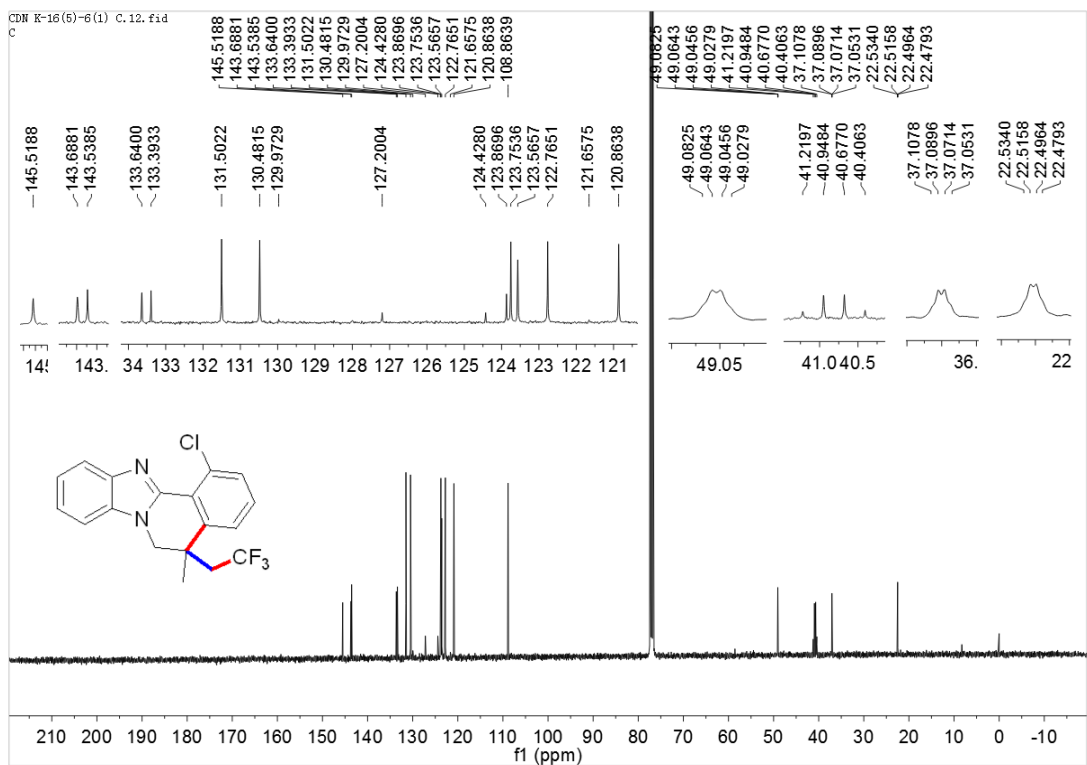

### DEPT 90 and DEPT 135

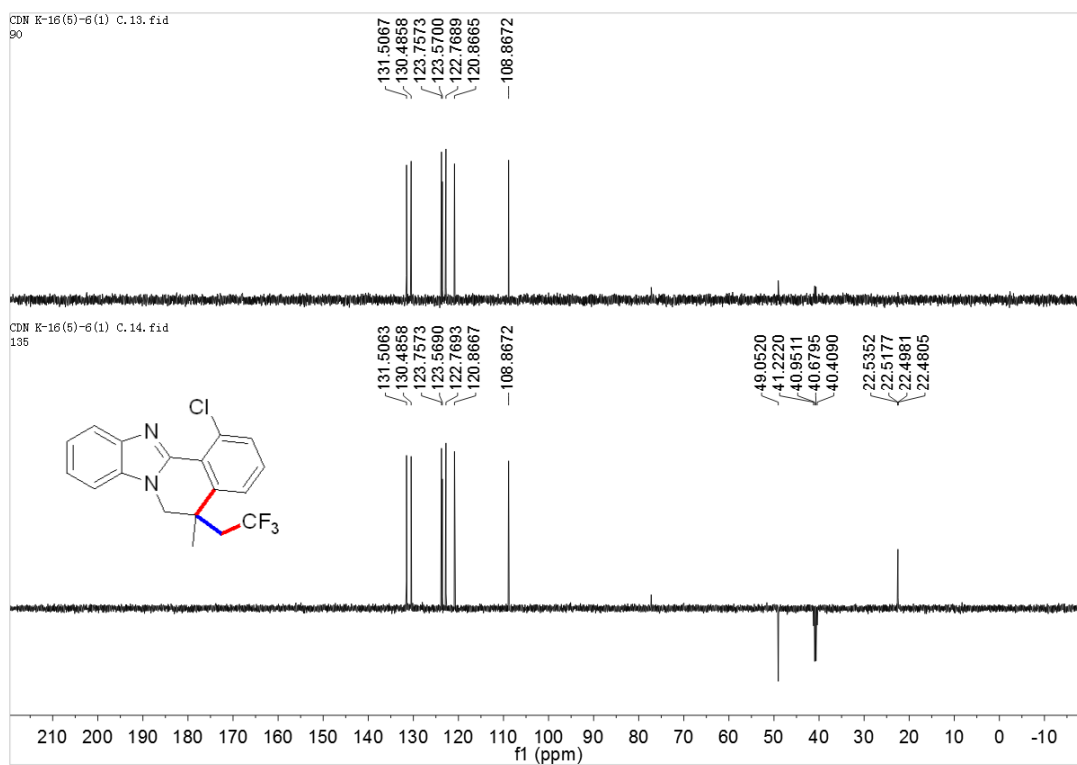

### <sup>19</sup>F NMR

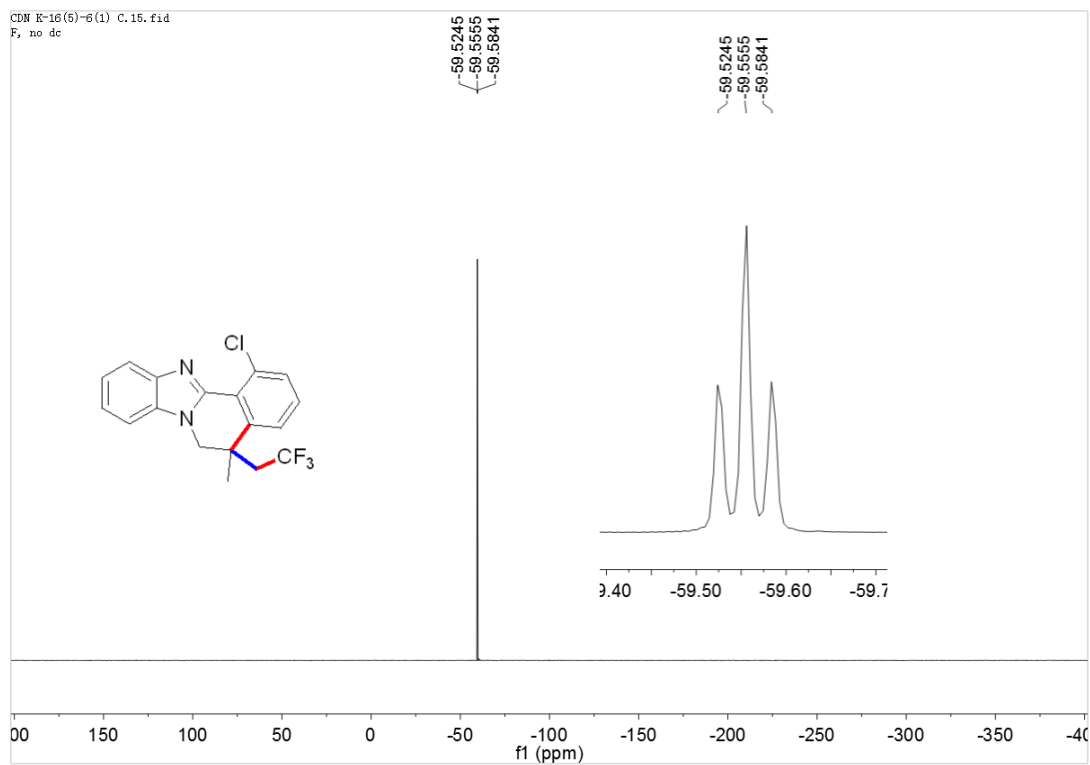

### 3f, <sup>1</sup>H NMR

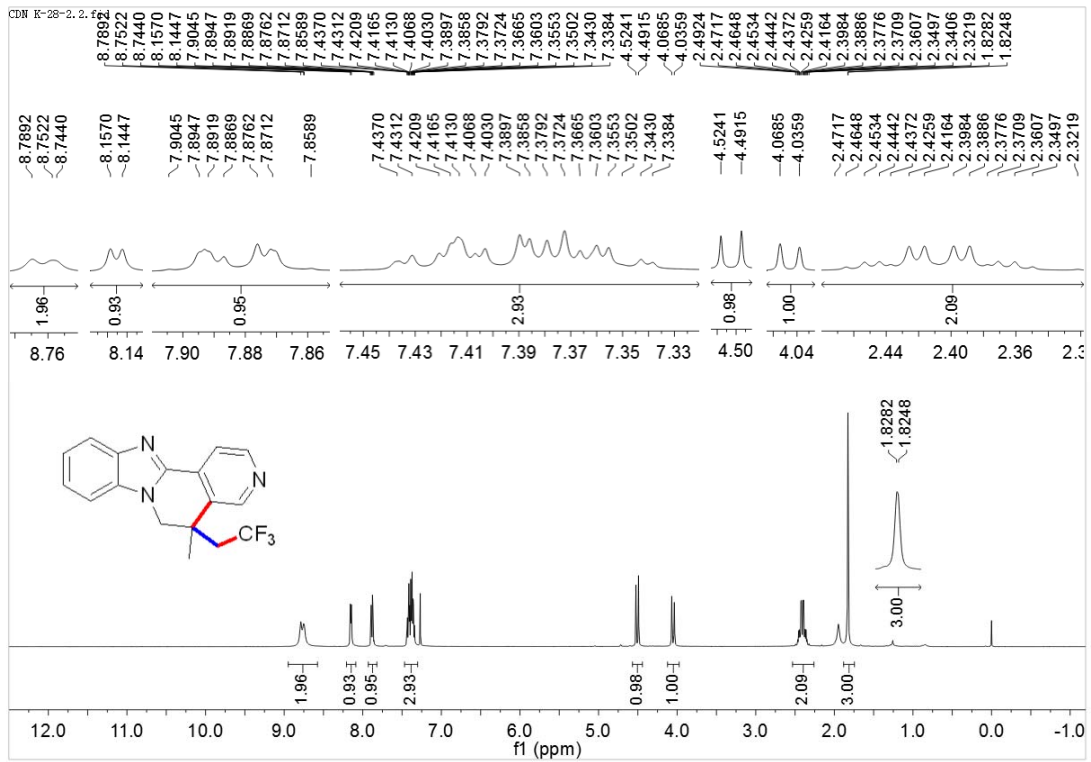

### <sup>13</sup>C NMR

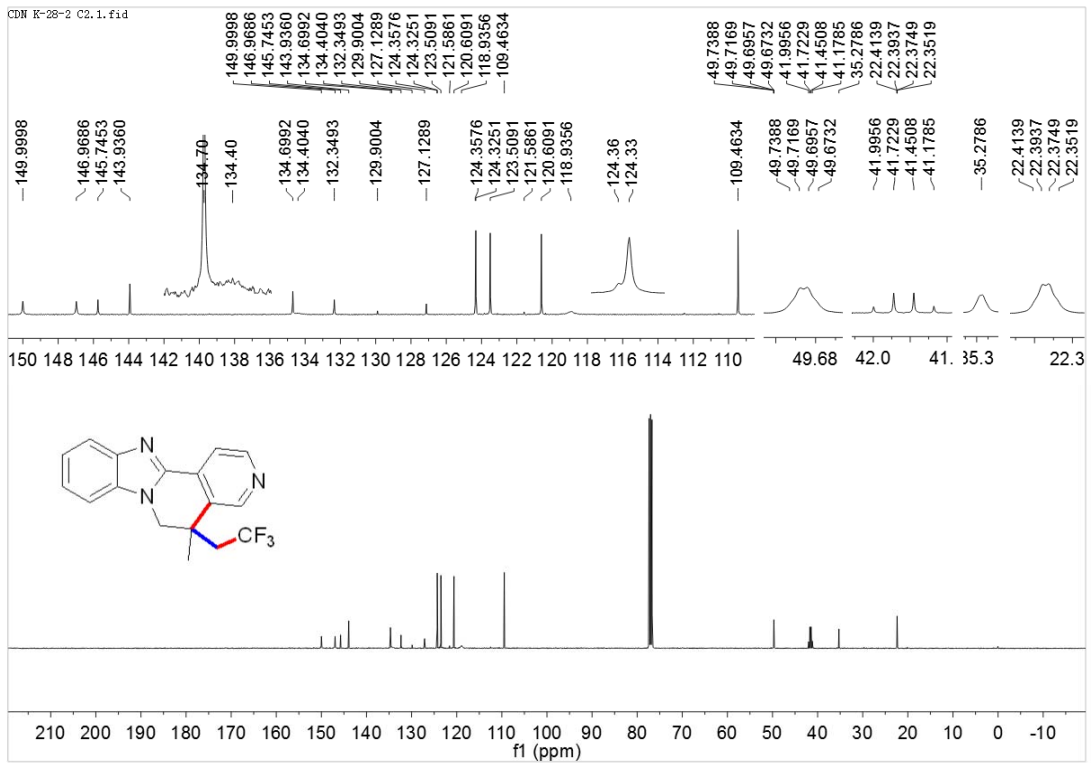

## DEPT 90 and DEPT 135

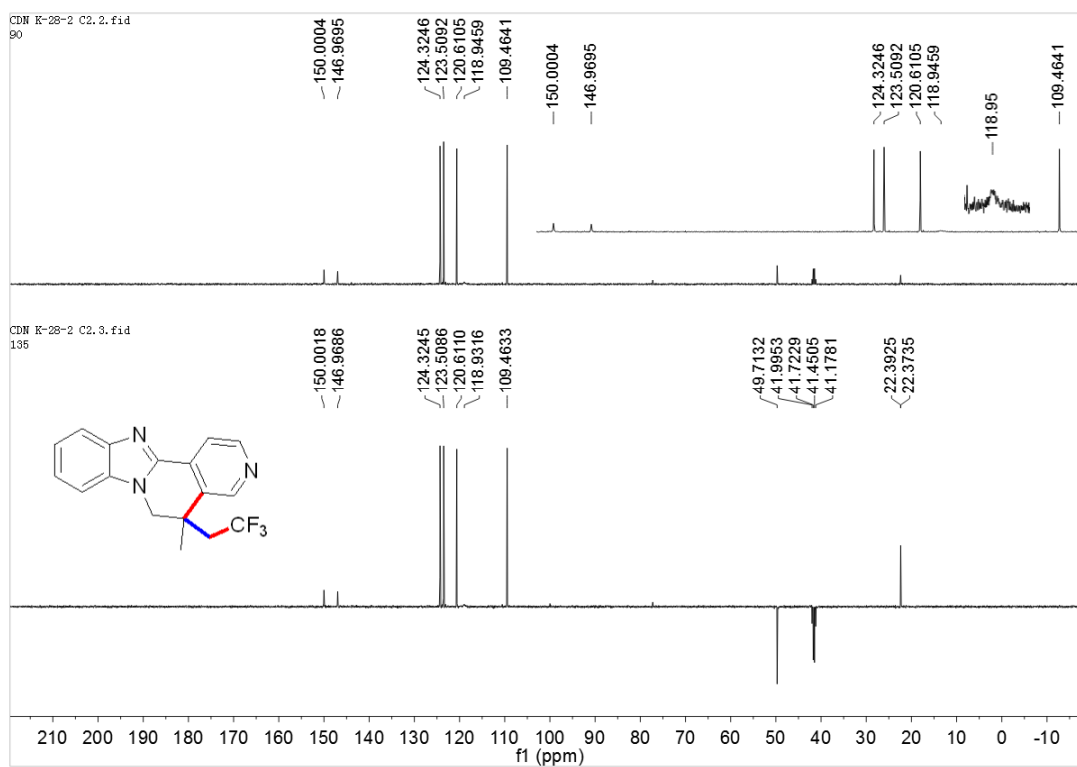

## <sup>19</sup>F NMR

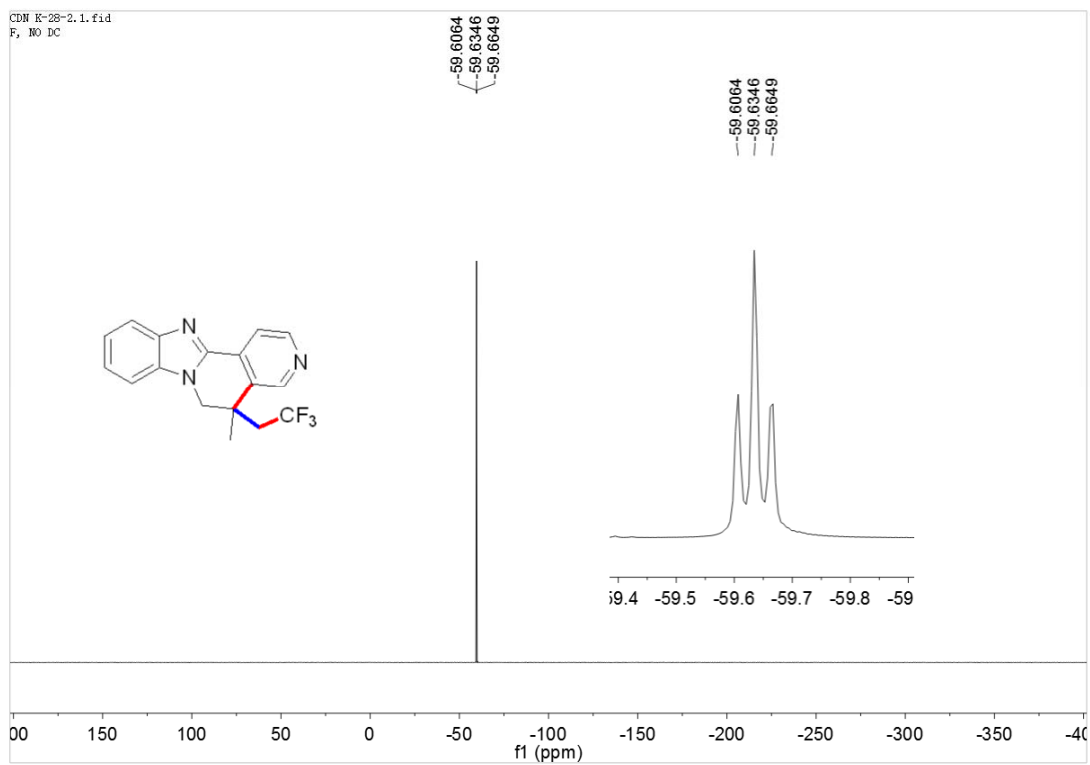

### 3g, <sup>1</sup>H NMR

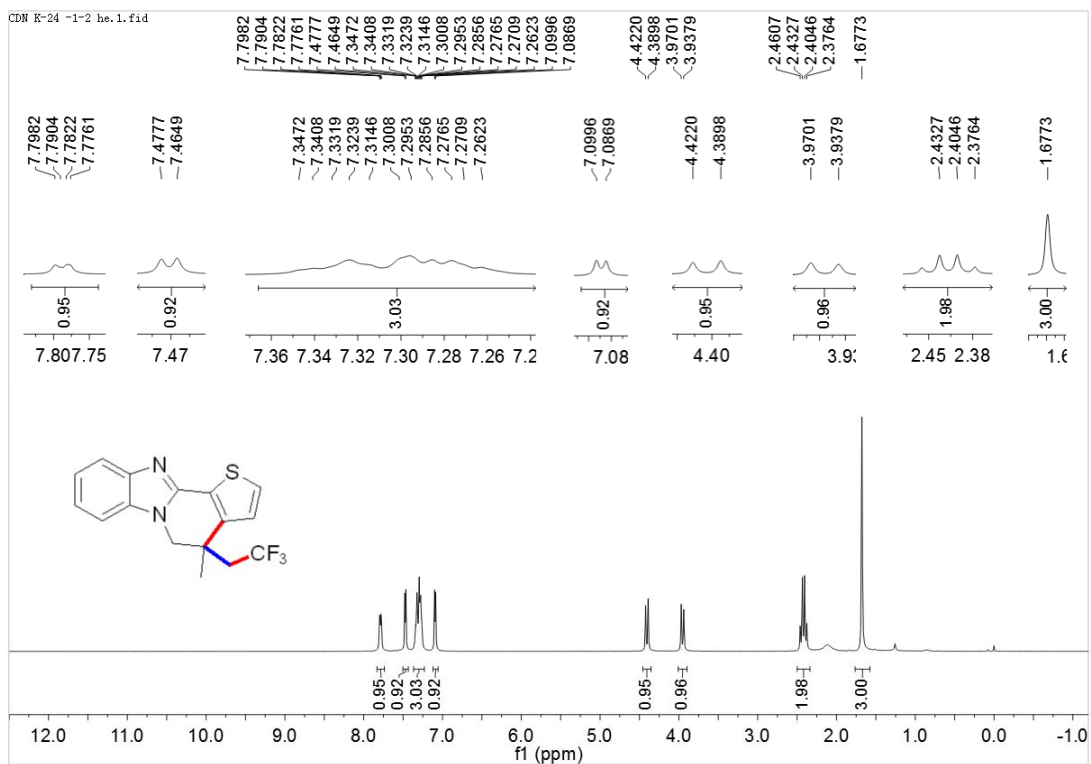

### <sup>13</sup>C NMR

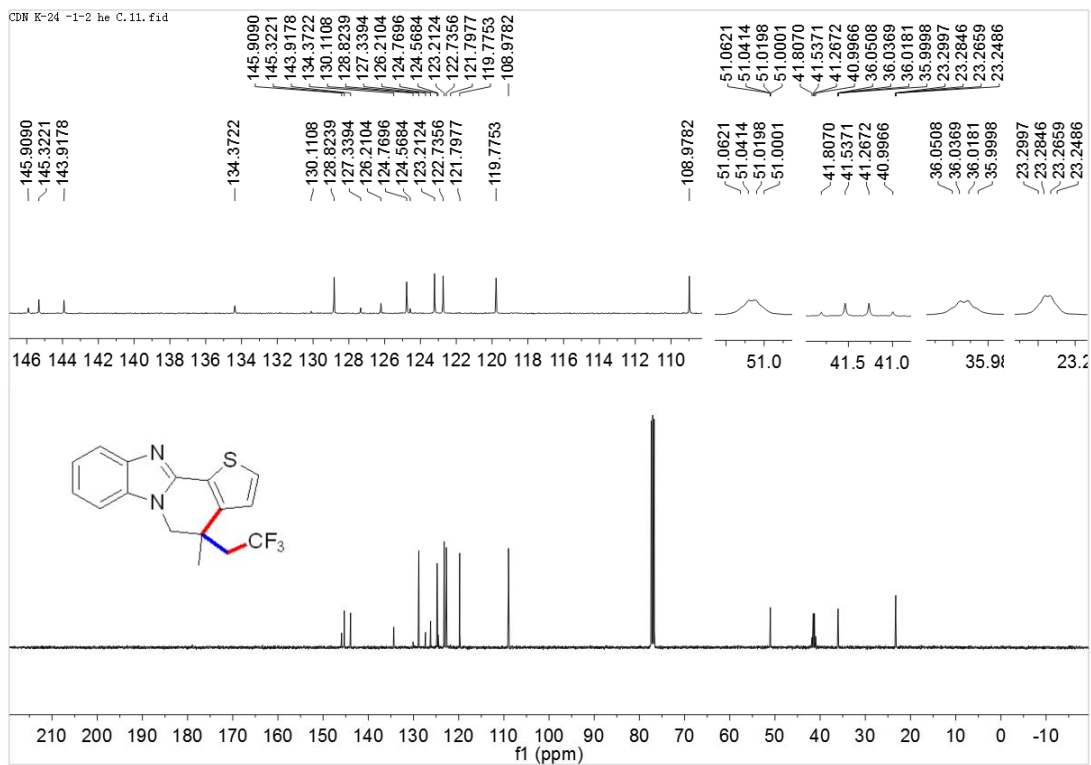

# DEPT 90 and DEPT 135

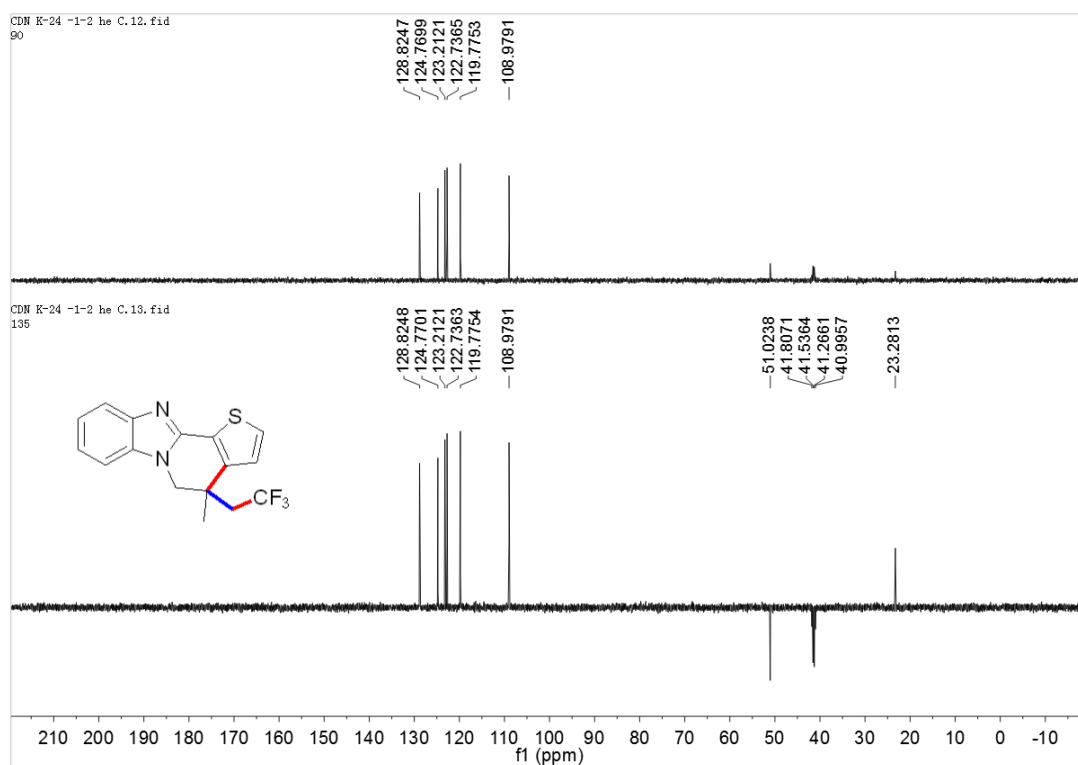

# <sup>19</sup>F NMR

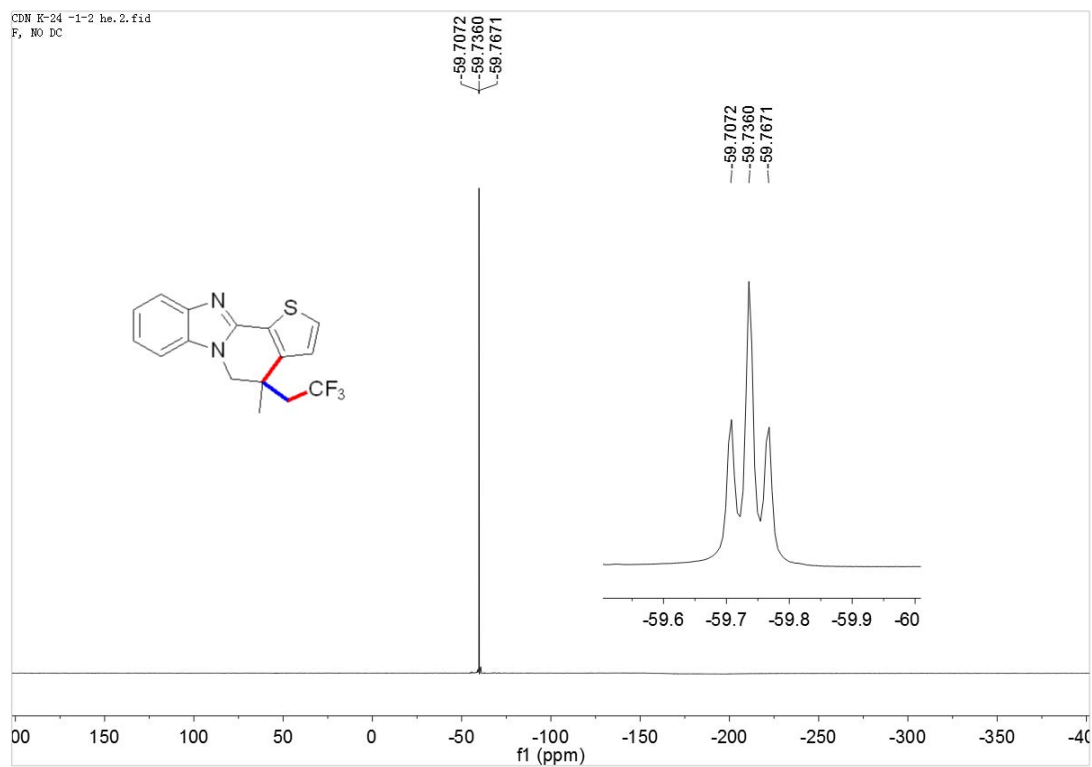

### 3h1, <sup>1</sup>H NMR

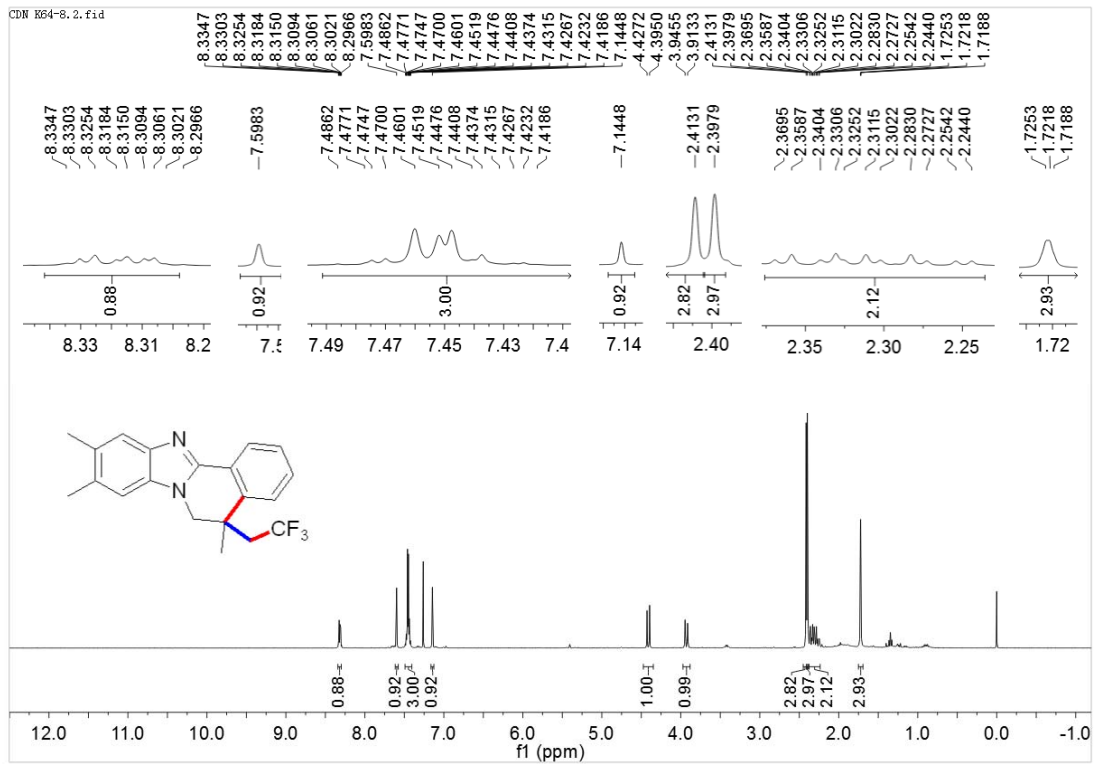

### <sup>13</sup>C NMR

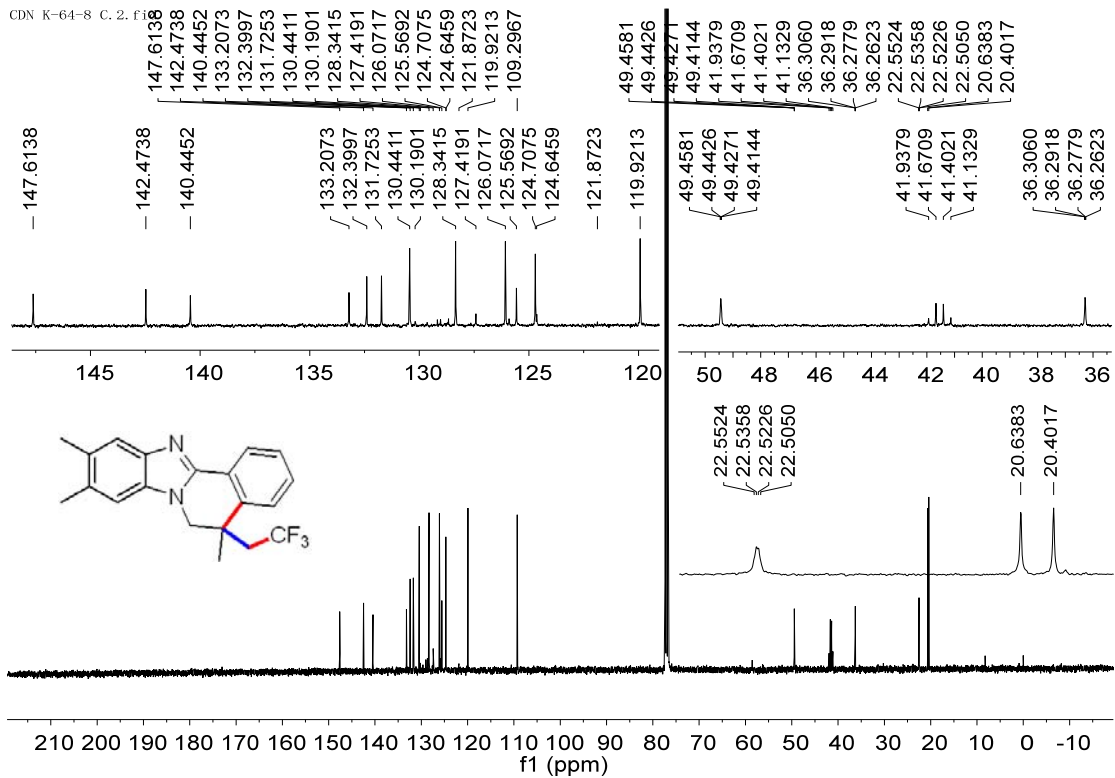



DEPT 90 and DEPT 135

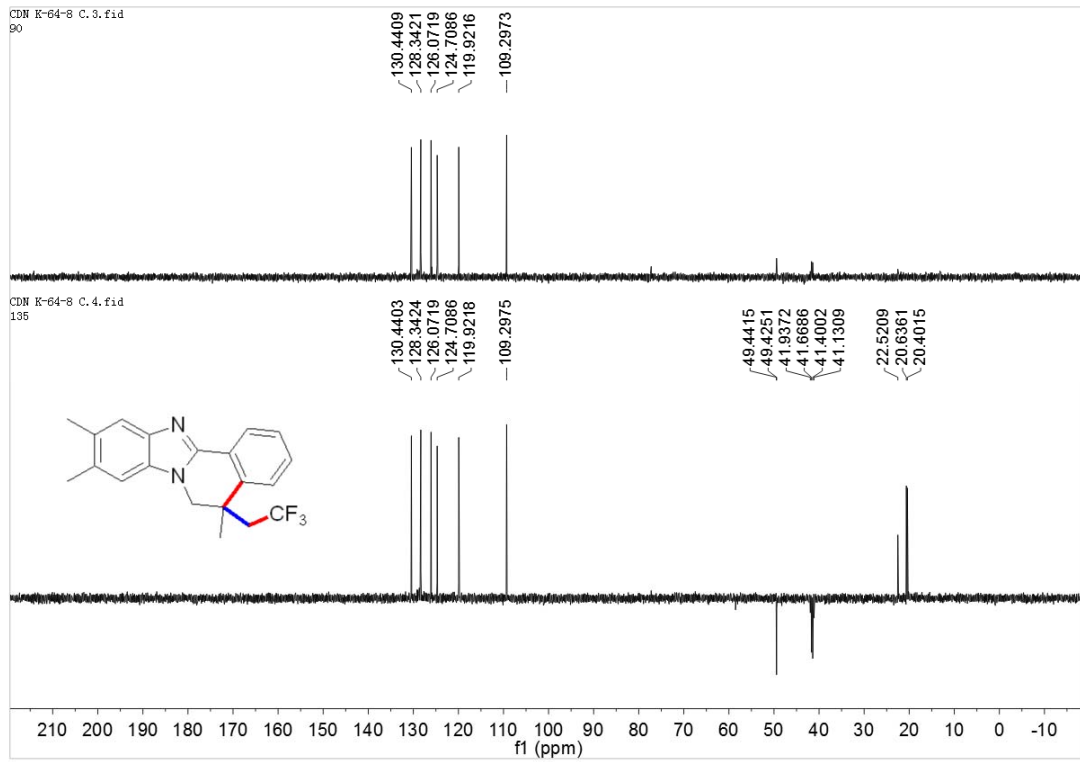

<sup>19</sup>F NMR

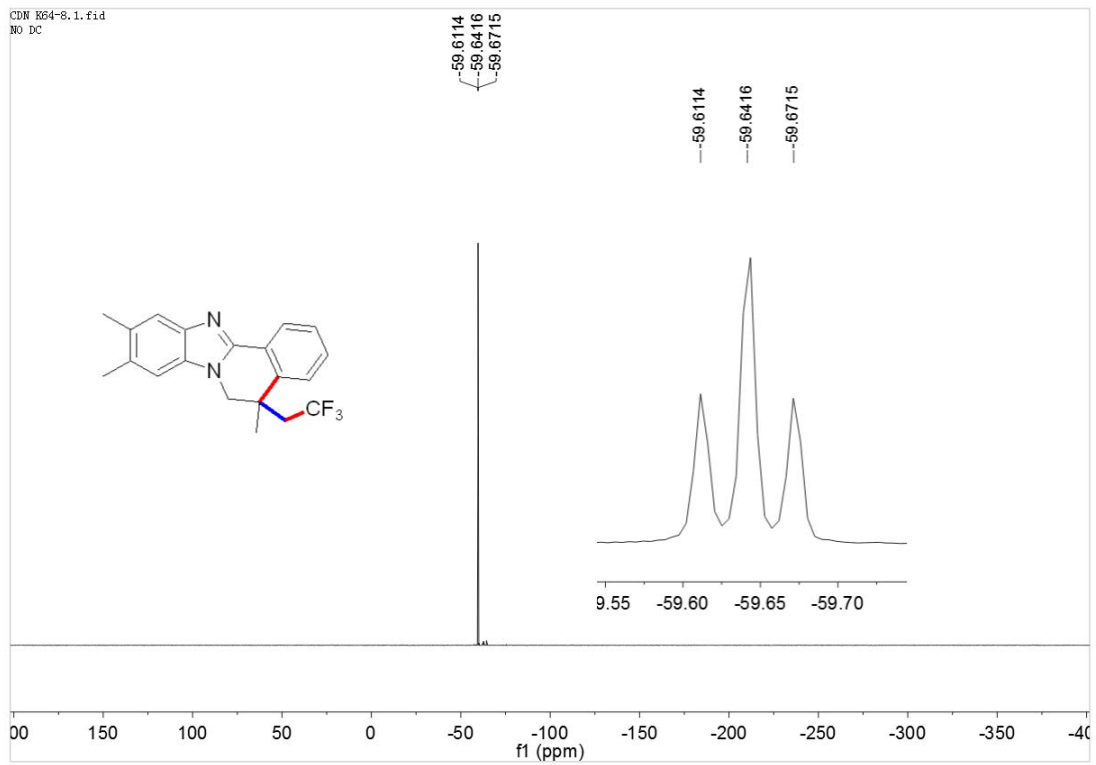

### 3h2, <sup>1</sup>H NMR

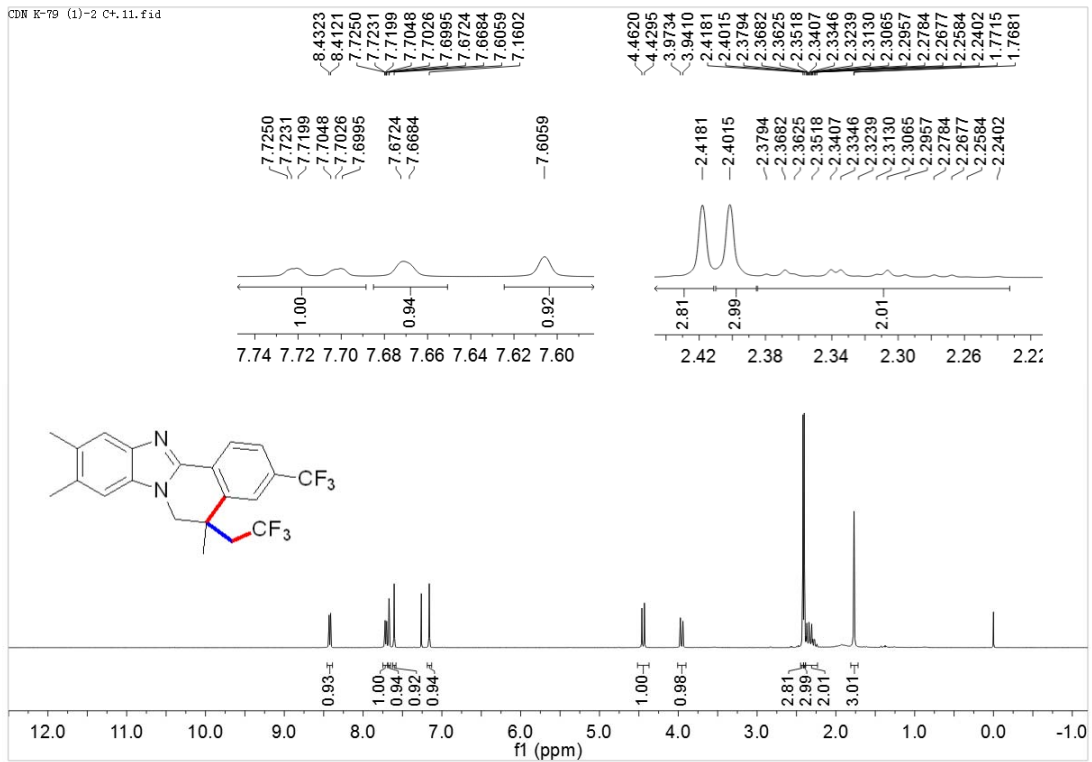

### <sup>13</sup>C NMR

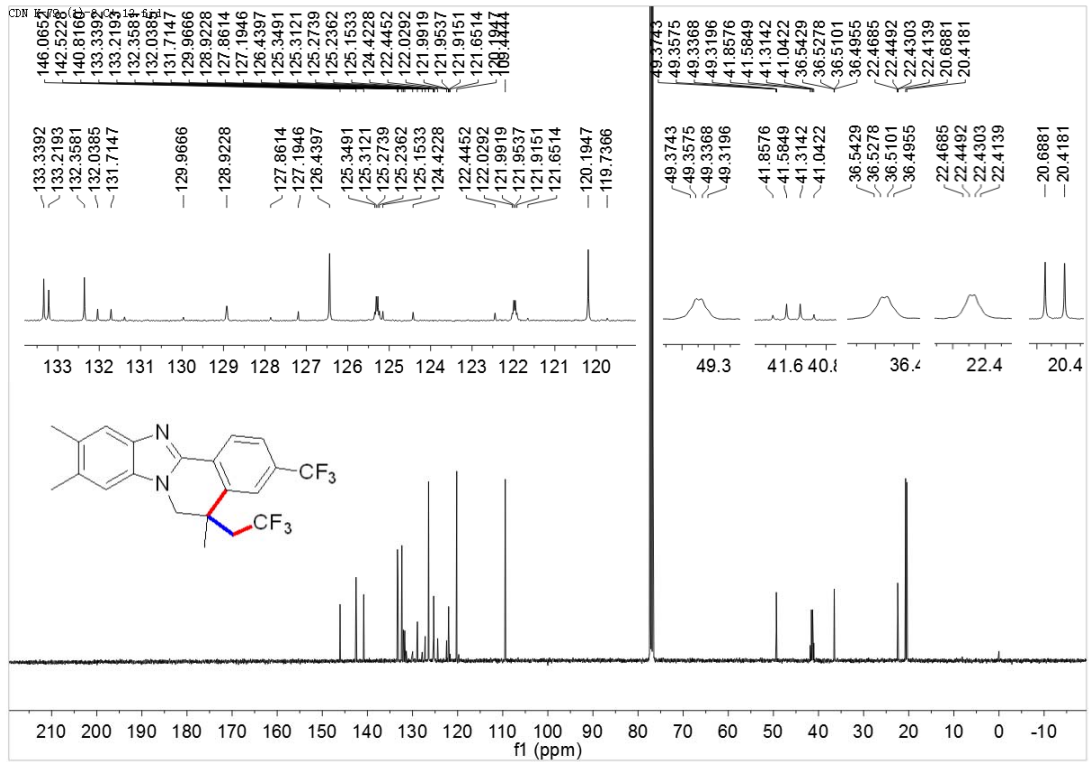

### DEPT 90 and DEPT 135

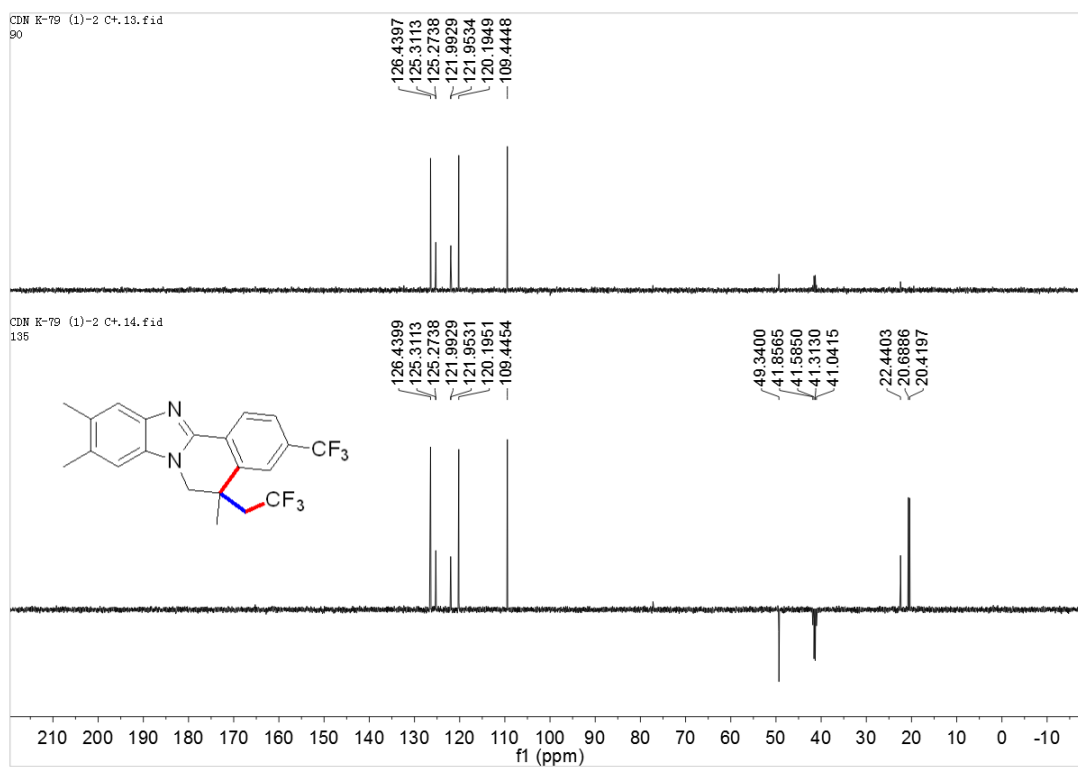

### <sup>19</sup>F NMR

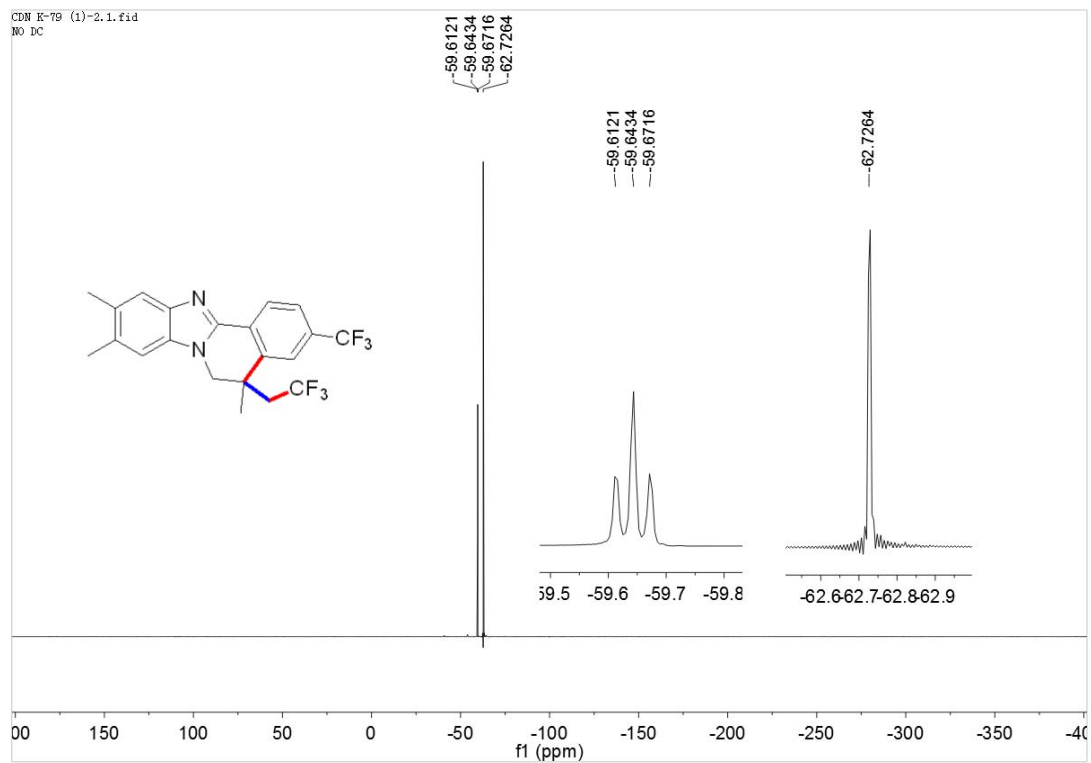



### DEPT 90 and DEPT 135

CDN K-61-3-3.28. fid  
90

131.0753  
128.4680  
126.0785  
124.7022  
107.2204  
107.0220  
97.1482  
96.9190

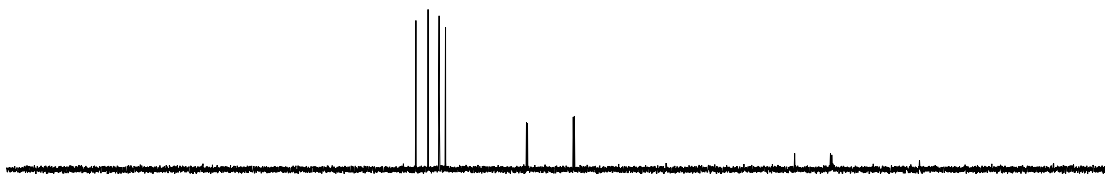

CDN K-61-3-3.29. fid  
135

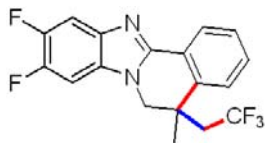

131.0753  
128.4679  
126.0784  
124.7028  
107.2194  
107.0244  
97.1466  
96.9188  
49.4343  
41.9701  
41.6996  
41.4300  
41.1604  
22.5032

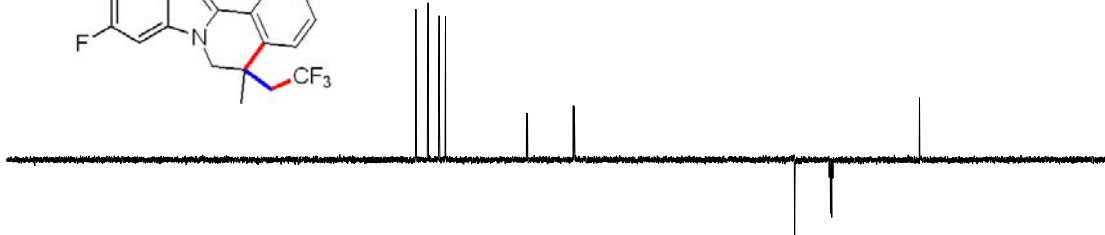

210 200 190 180 170 160 150 140 130 120 110 100 90 80 70 60 50 40 30 20 10 0 -10  
f1 (ppm)

### <sup>19</sup>F NMR

CDN K-61-3-3.2. fid

-59.7957  
-59.8242  
-59.8554  
-140.7709  
-140.7942  
-140.8154  
-140.8253  
-140.8482  
-140.8703  
-142.7901  
-142.8093  
-142.8177  
-142.8372  
-142.8441  
-142.8643  
-142.8727  
-142.8912

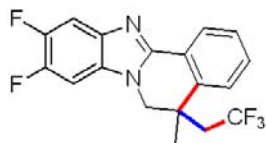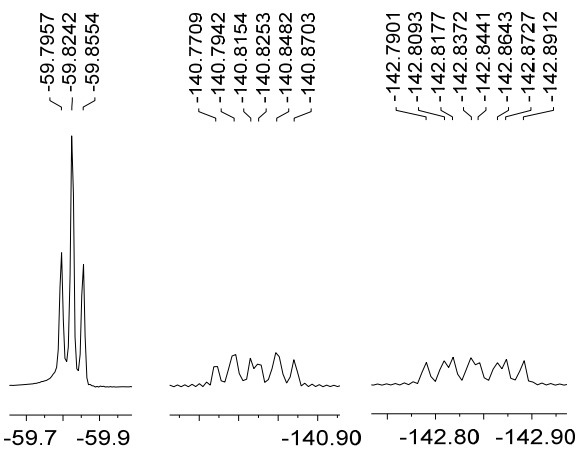

00 150 100 50 0 -50 -100 -150 -200 -250 -300 -350 -4  
f1 (ppm)

### 3j1, <sup>1</sup>H NMR

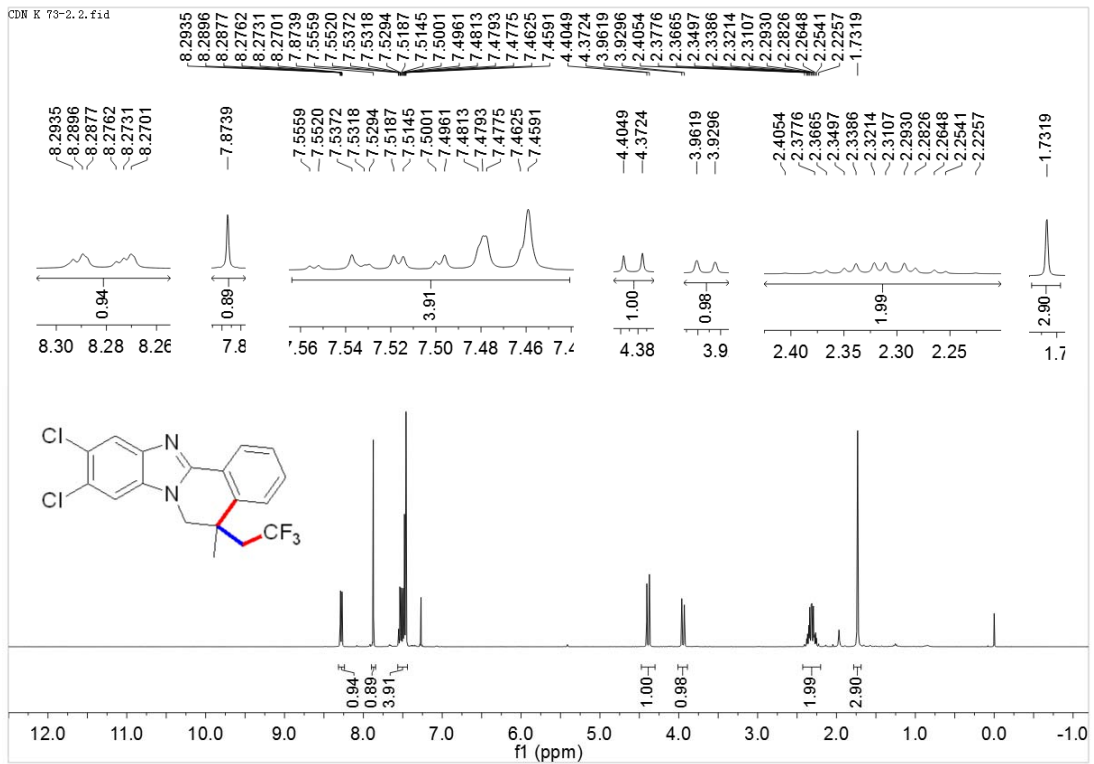

### <sup>13</sup>C NMR

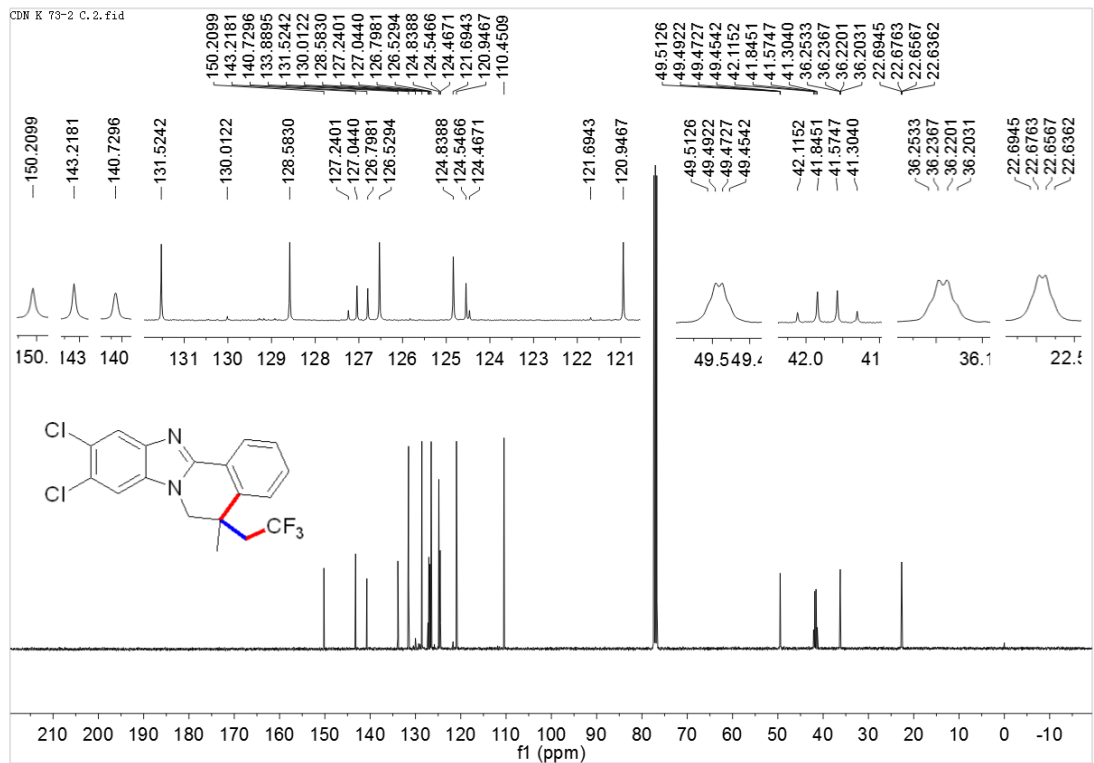

### DEPT 90 and DEPT 135

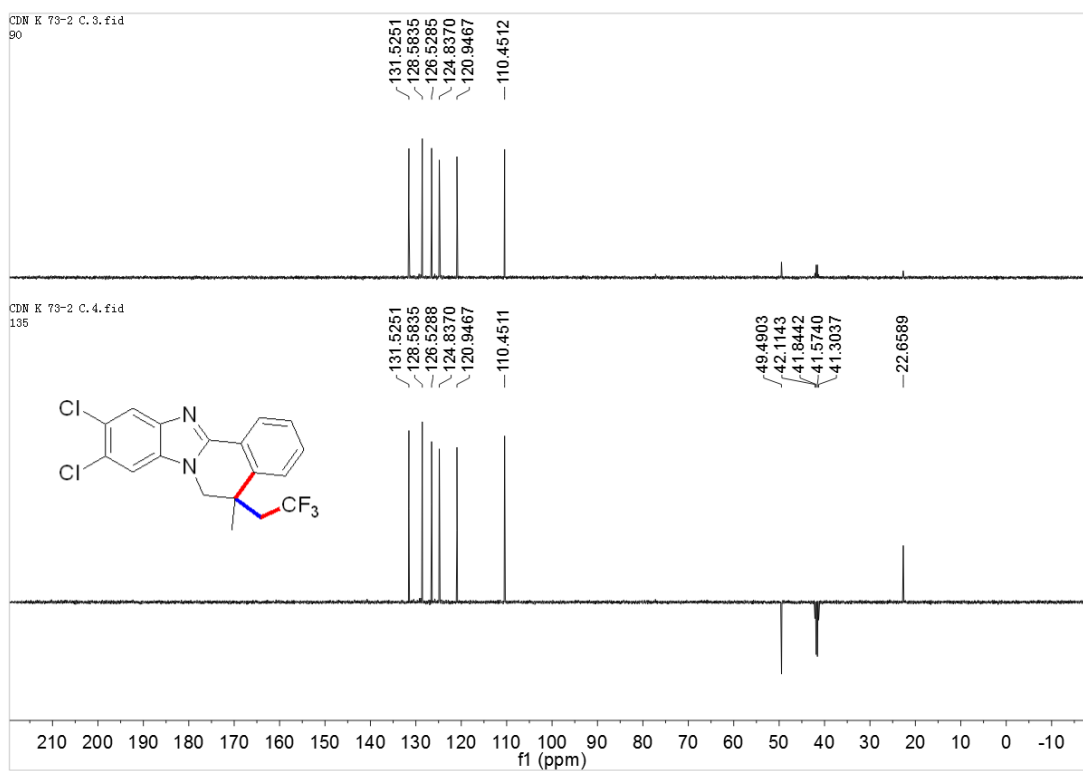

### <sup>19</sup>F NMR

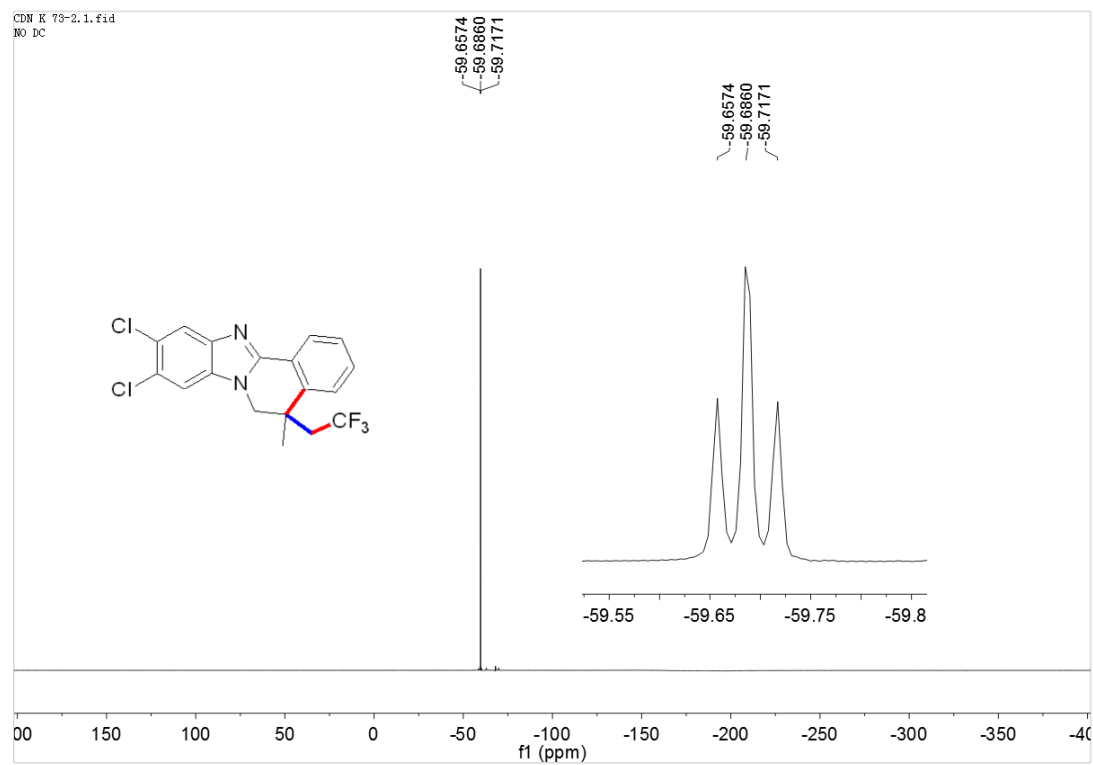

### 3j2, <sup>1</sup>H NMR

CDN K-77-1 C. 1. f1d

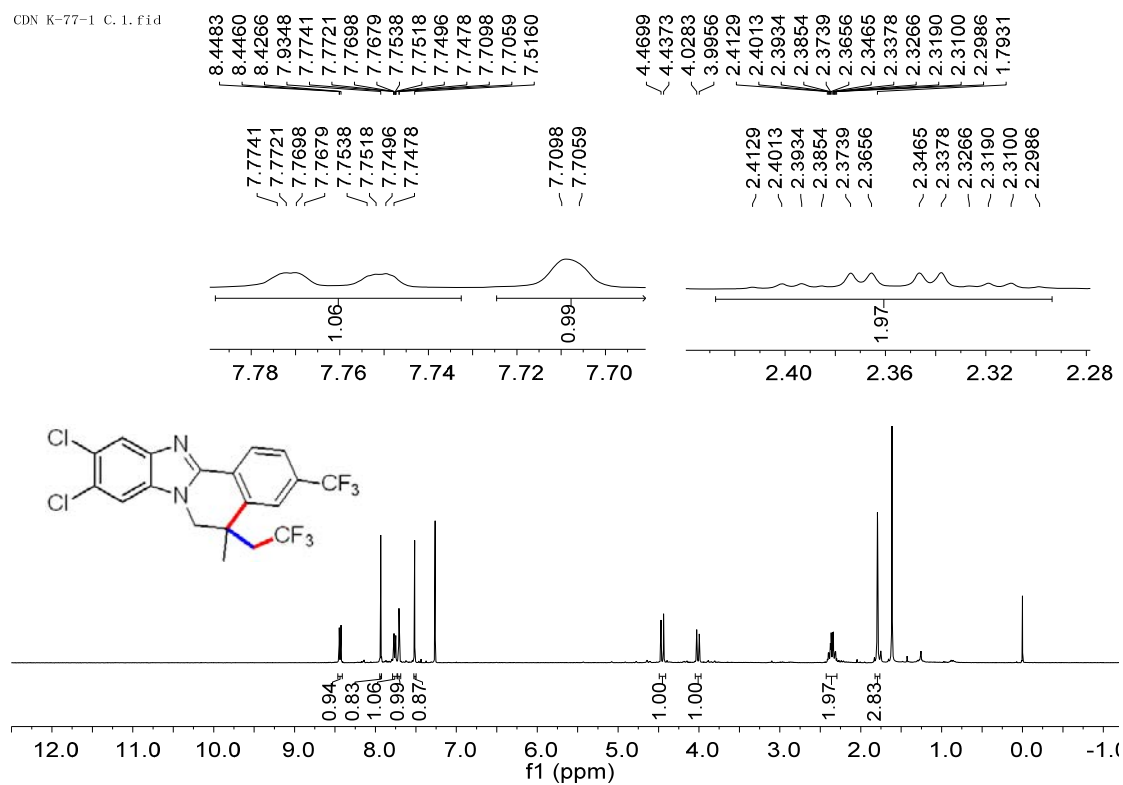

### <sup>13</sup>C NMR

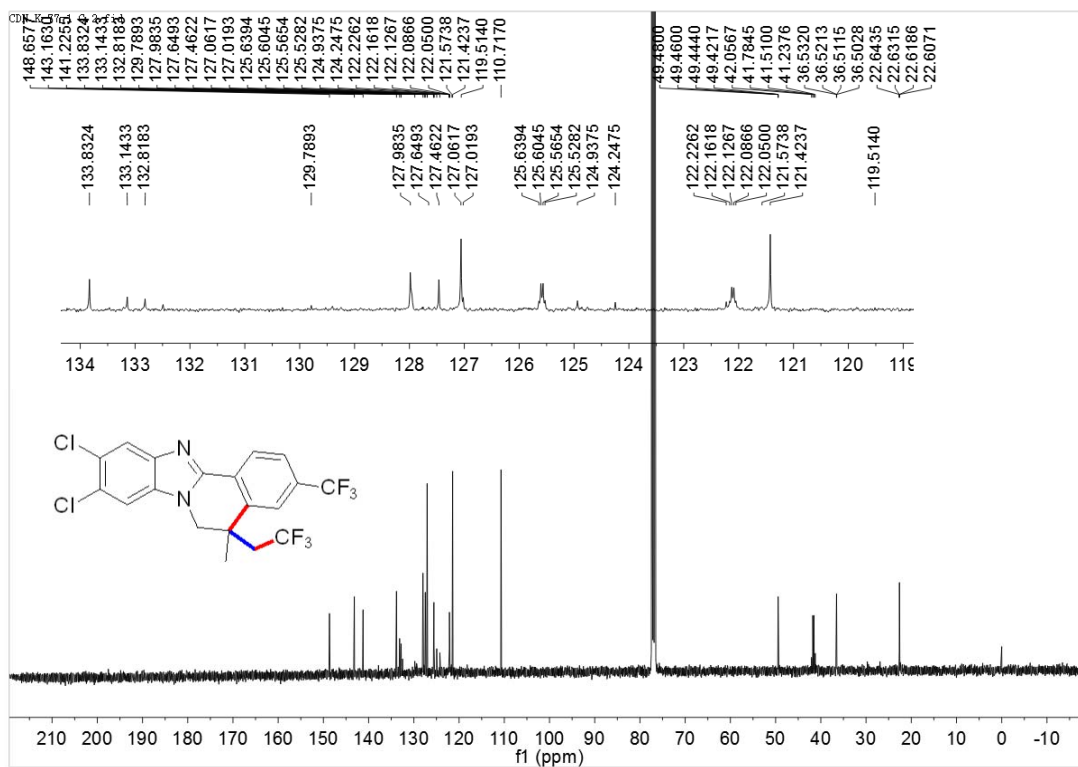



### DEPT 90 and DEPT 135

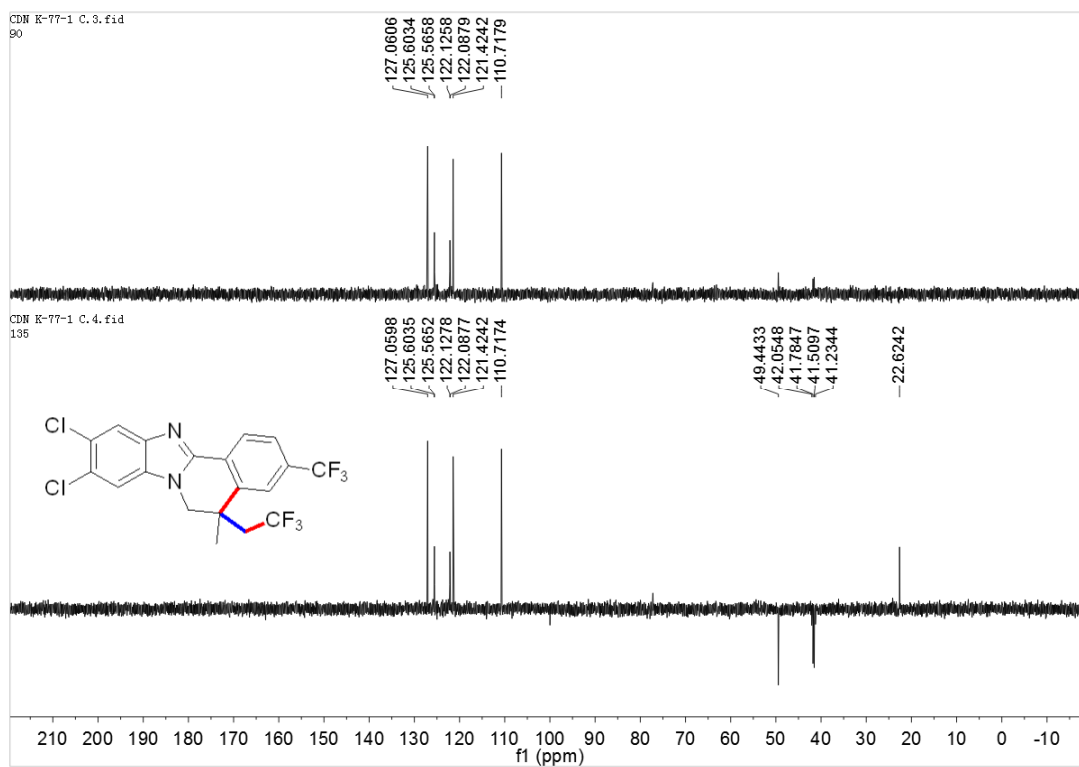

### <sup>19</sup>F NMR

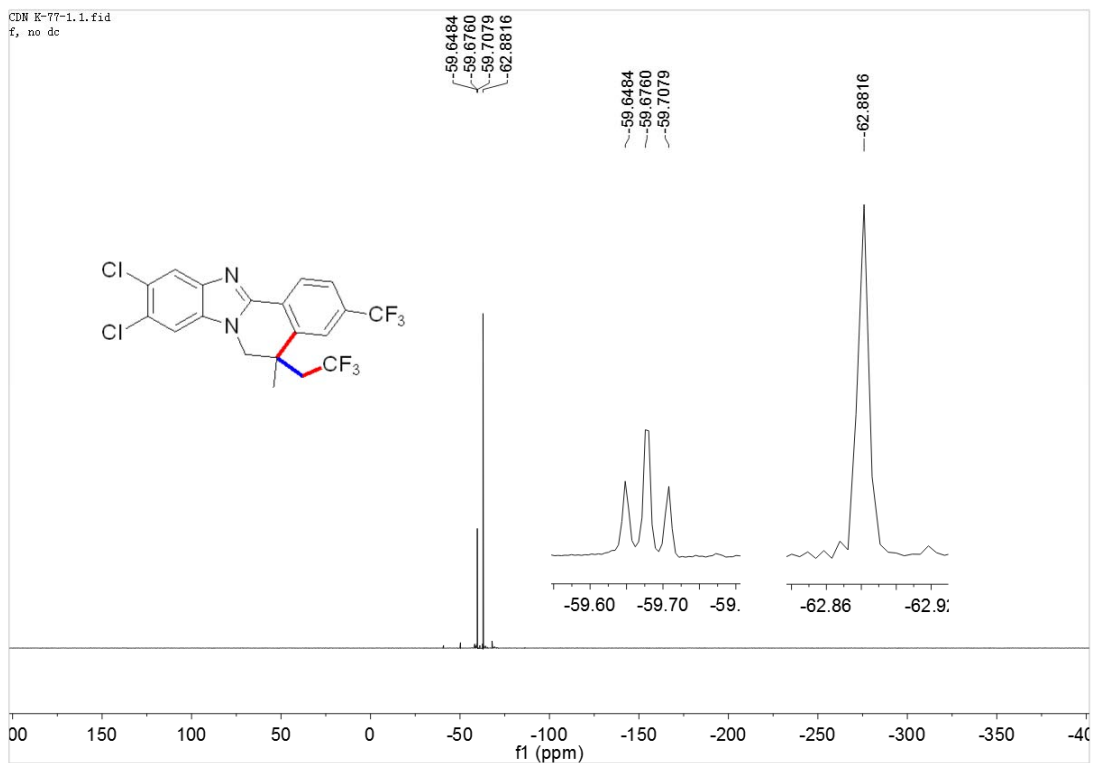

### 3k, <sup>1</sup>H NMR

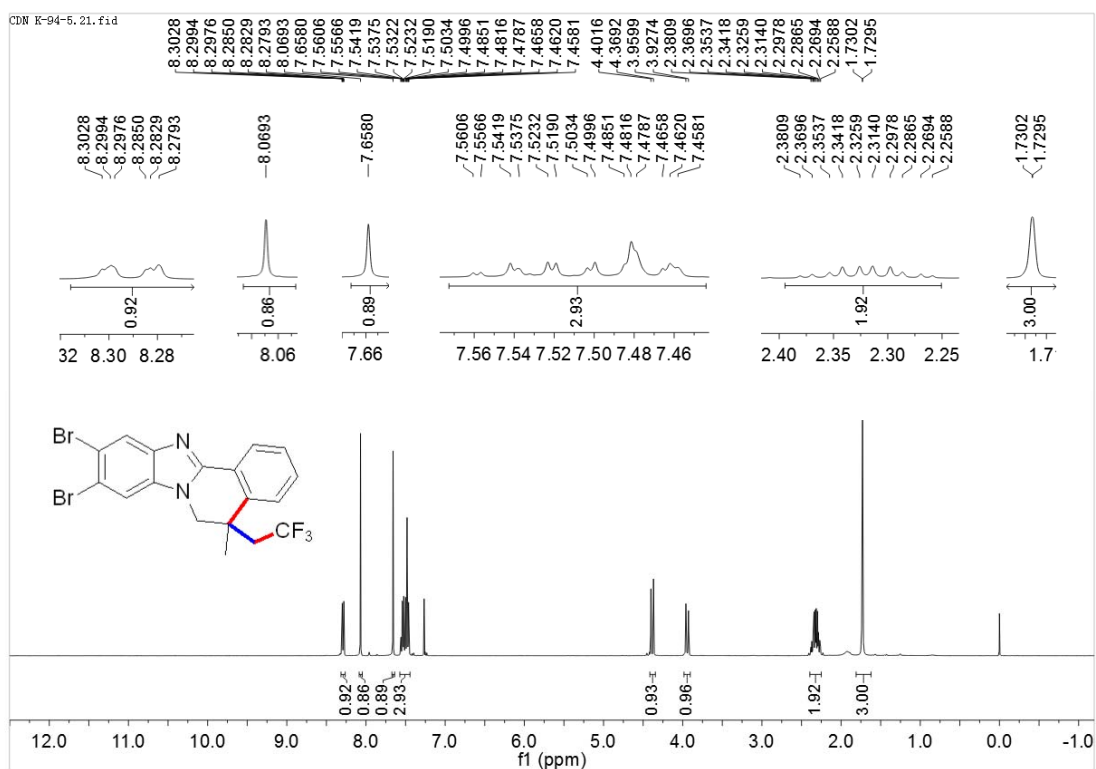

### <sup>13</sup>C NMR

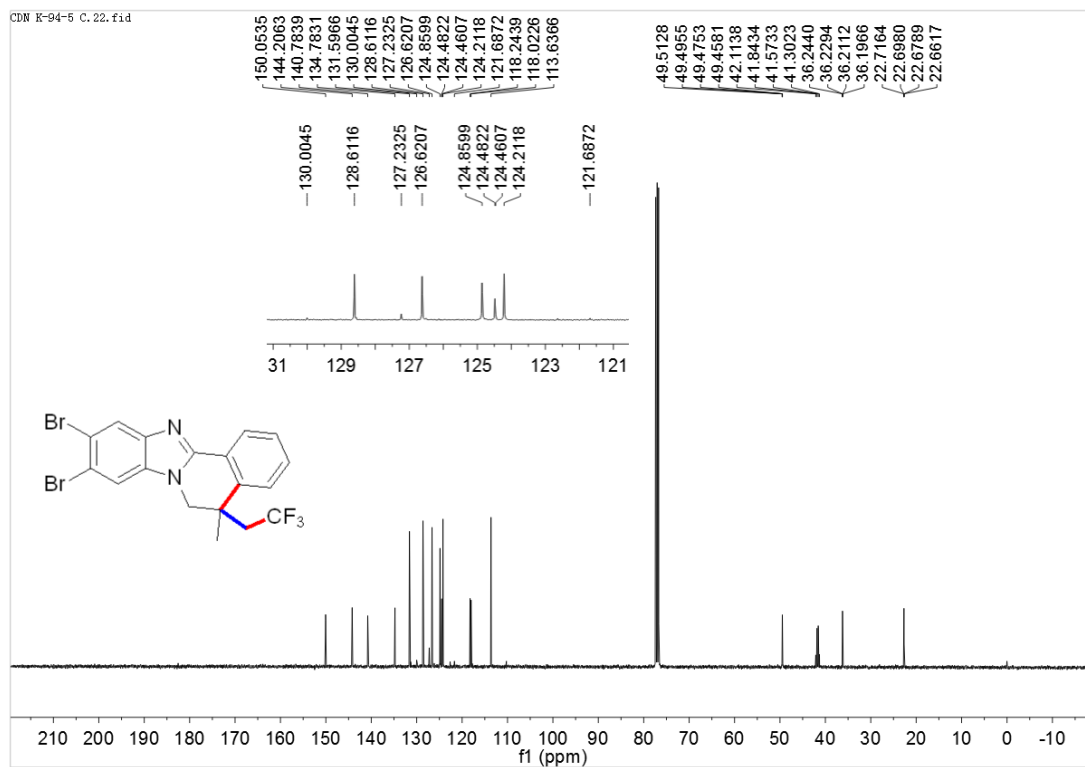

# DEPT 90 and DEPT 135

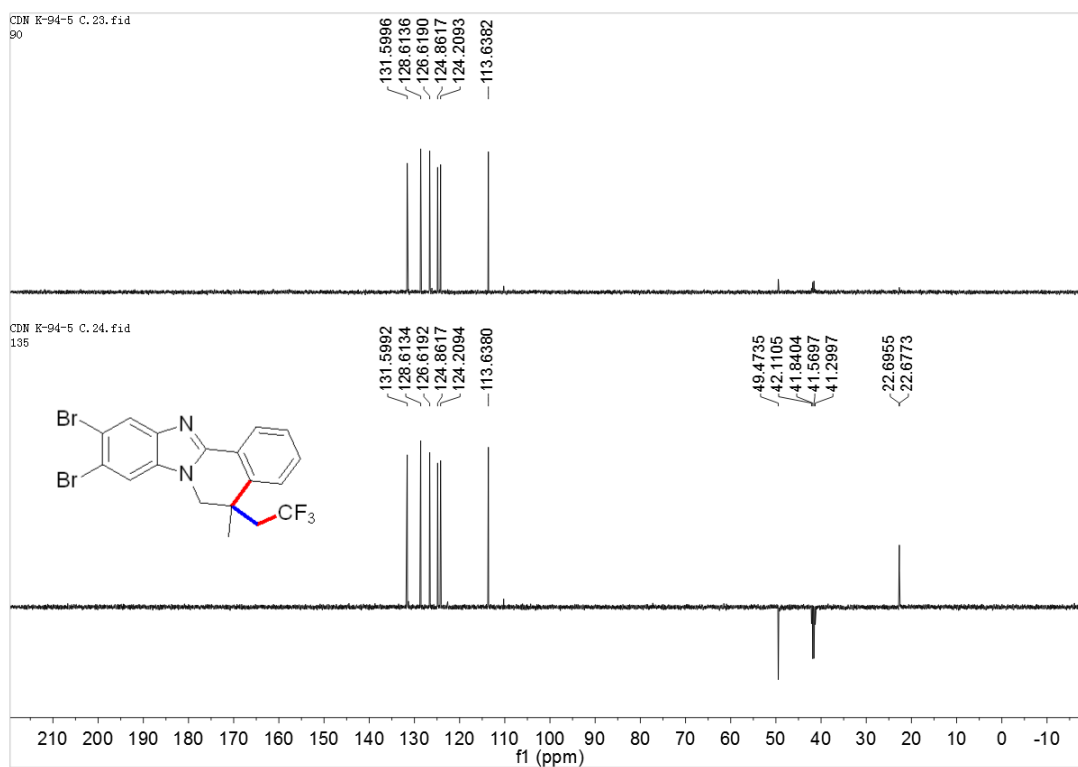

# <sup>19</sup>F NMR

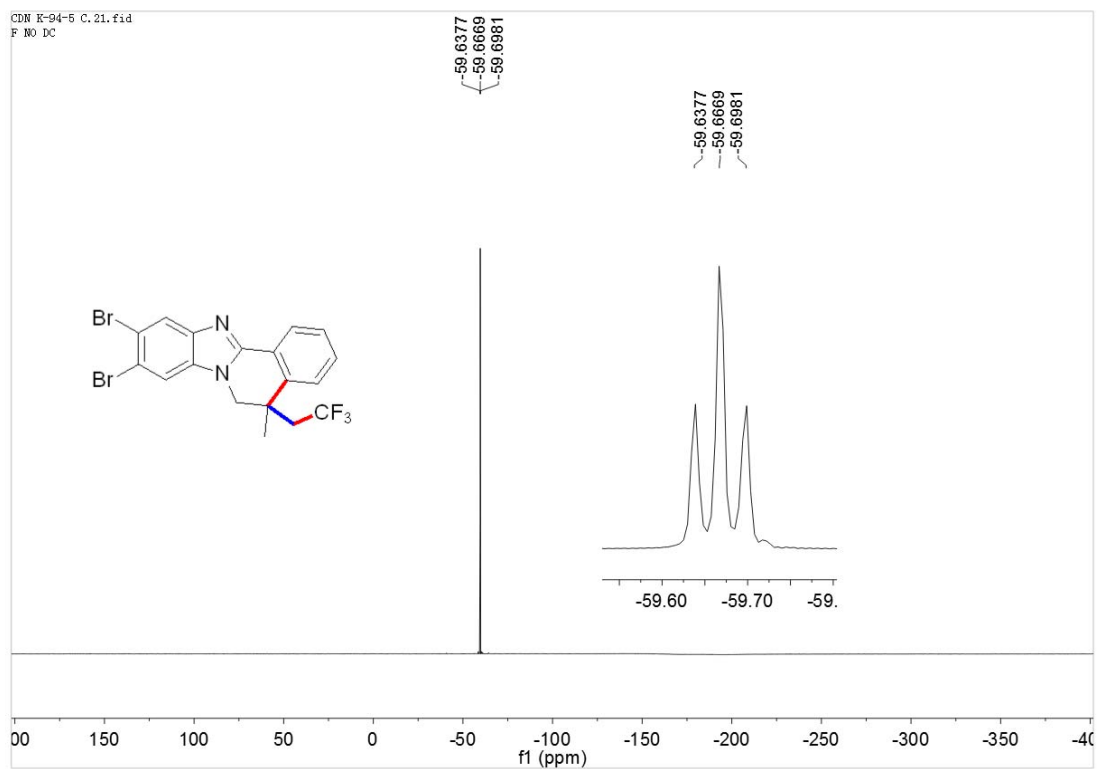

### 31, <sup>1</sup>H NMR

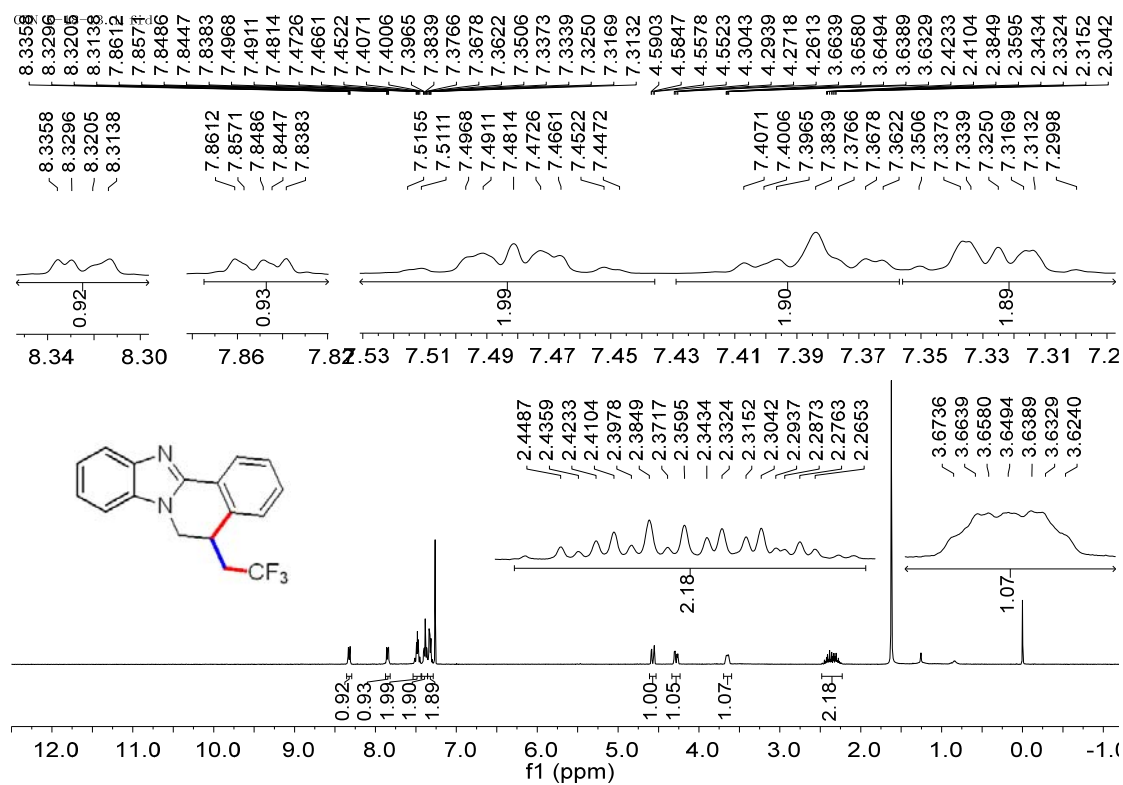

### <sup>13</sup>C NMR

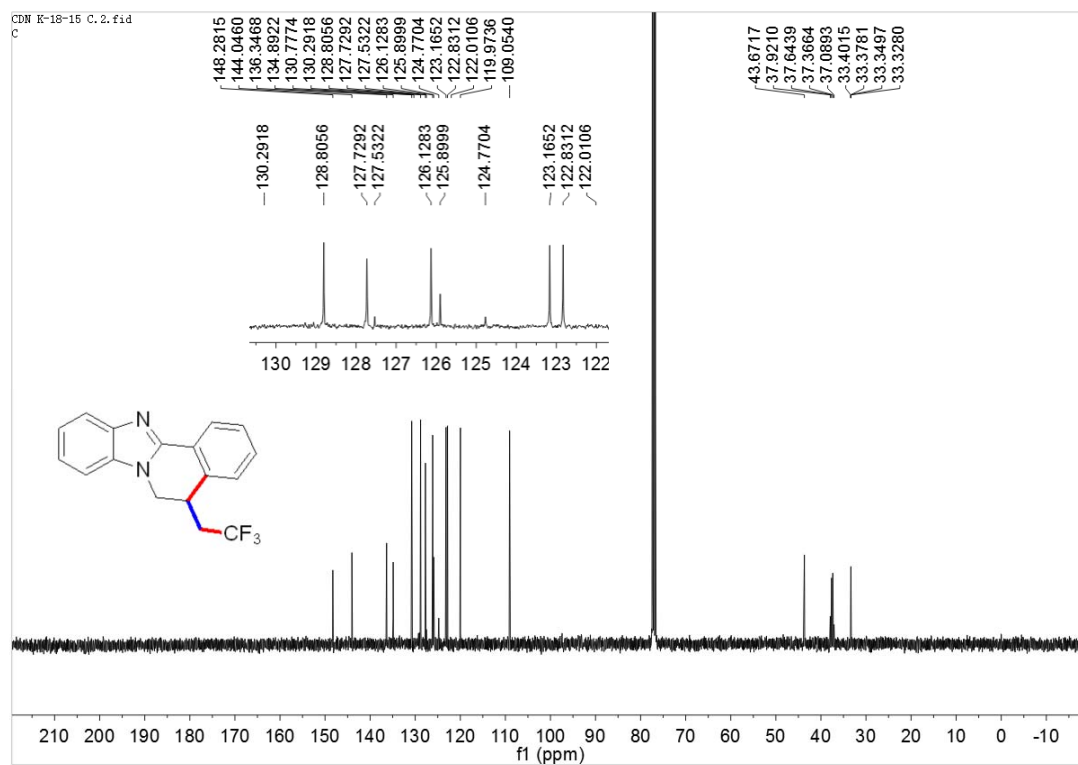

### DEPT 90 and DEPT 135

CDN K-18-15 C. 3. fid  
90

130.7778  
128.8059  
127.7294  
126.1269  
123.1641  
122.8315  
119.9735  
-109.0535

33.4034  
33.3785  
33.3508  
33.3255

CDN K-18-15 C. 4. fid  
135

130.7780  
128.8059  
127.7302  
126.1269  
123.1642  
122.8314  
119.9737  
-109.0536

43.6671  
37.9230  
37.6442  
37.3665  
37.0872  
33.4006  
33.3777  
33.3519  
33.3278

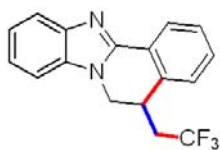

210 200 190 180 170 160 150 140 130 120 110 100 90 80 70 60 50 40 30 20 10 0 -10  
f1 (ppm)

### <sup>19</sup>F NMR

CDN K-18 (3)-8.12.fid  
F, NO DC

63.5165  
63.5448  
63.5733

63.5165  
63.5448  
63.5733

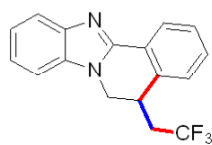

-63.45 -63.50 -63.55 -63.60 -63.65

00 150 100 50 0 -50 -100 -150 -200 -250 -300 -350 -400  
f1 (ppm)

### 3m, <sup>1</sup>H NMR

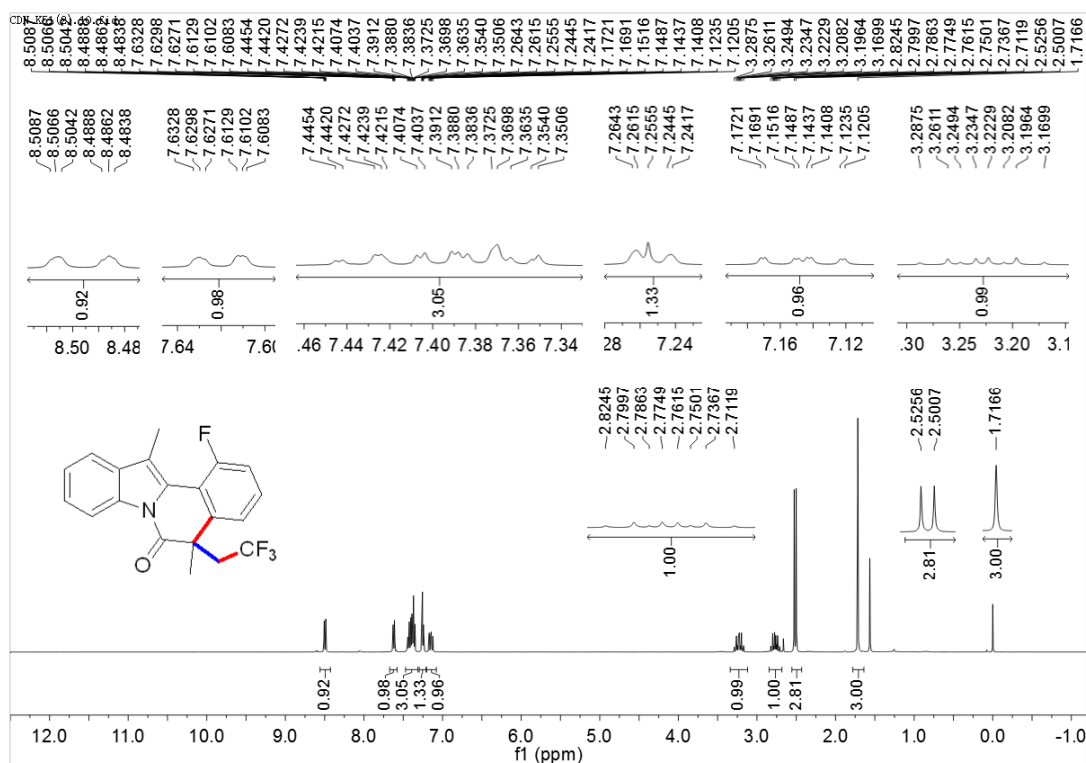

### <sup>13</sup>C NMR

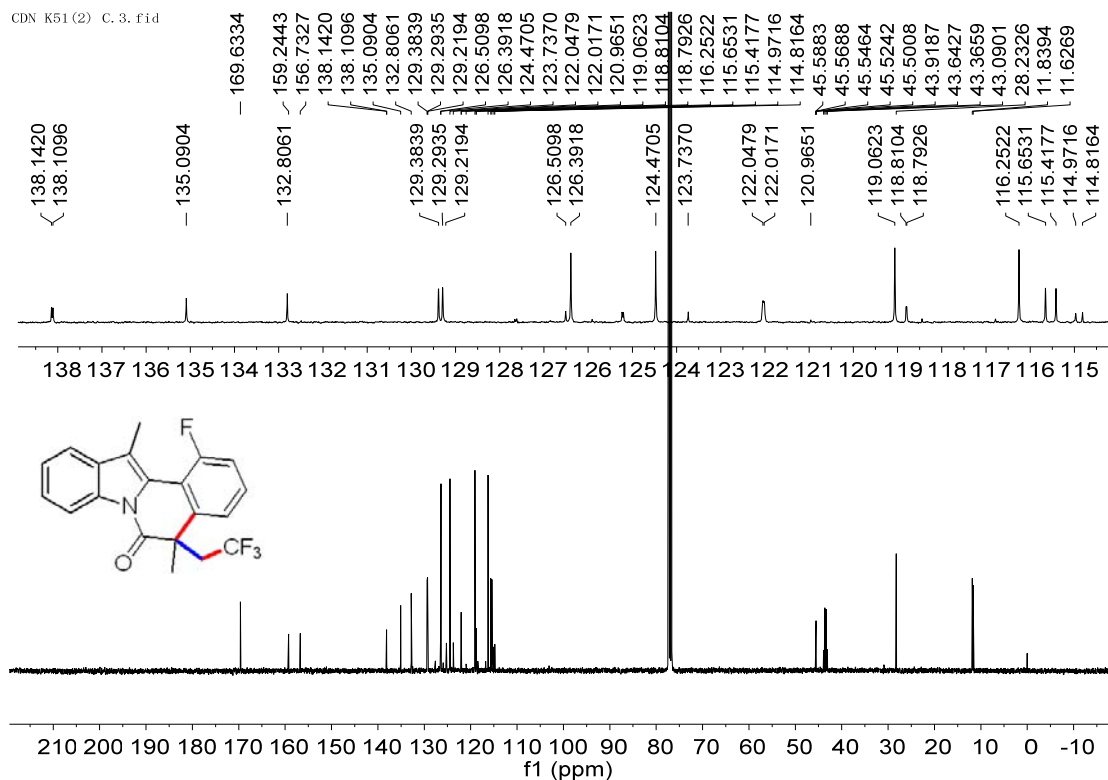

### DEPT 90 and DEPT 135

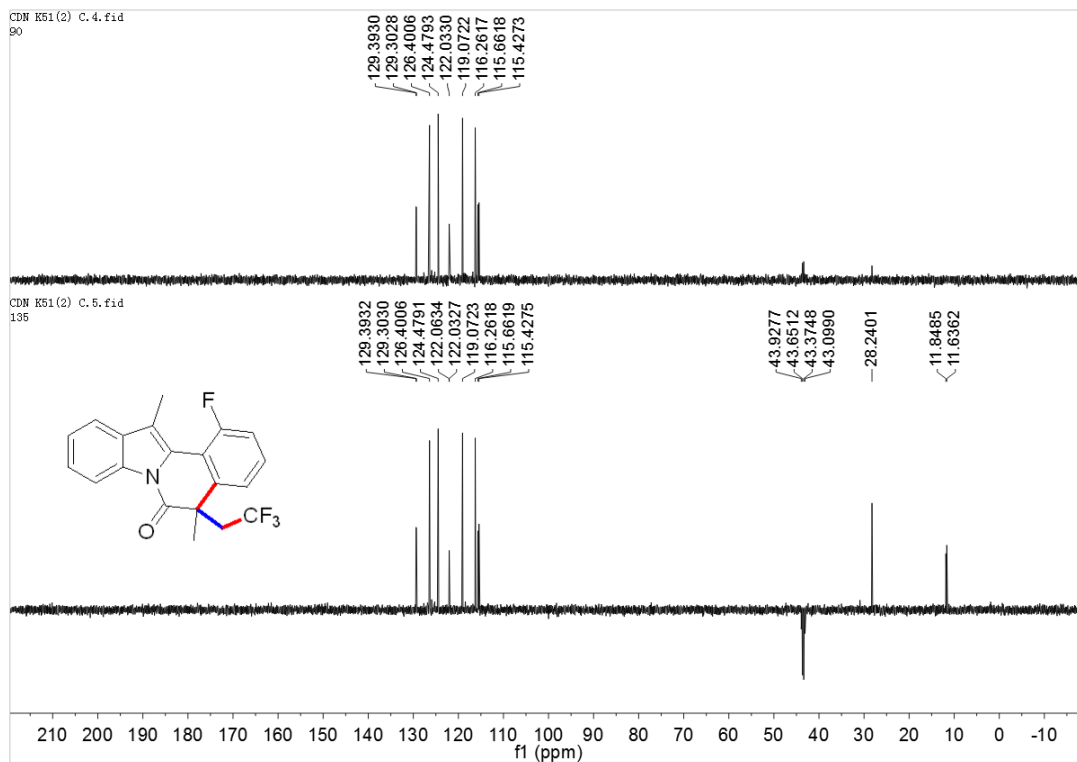

### <sup>19</sup>F NMR

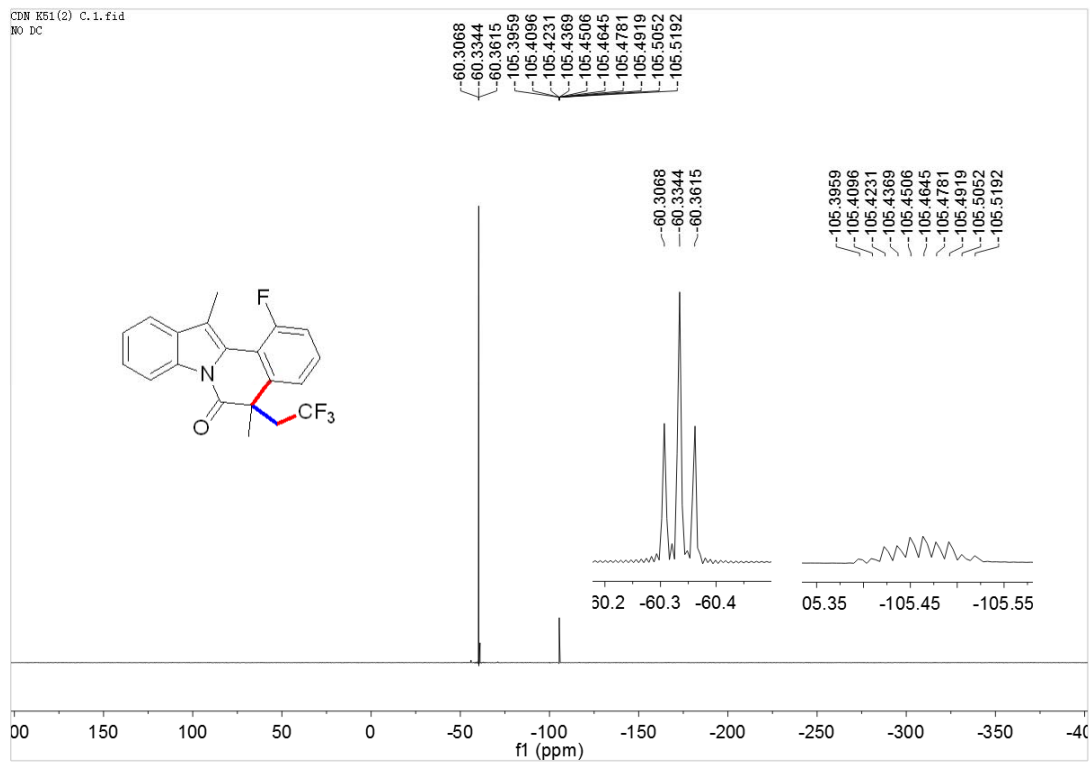

### 3n1, <sup>1</sup>H NMR

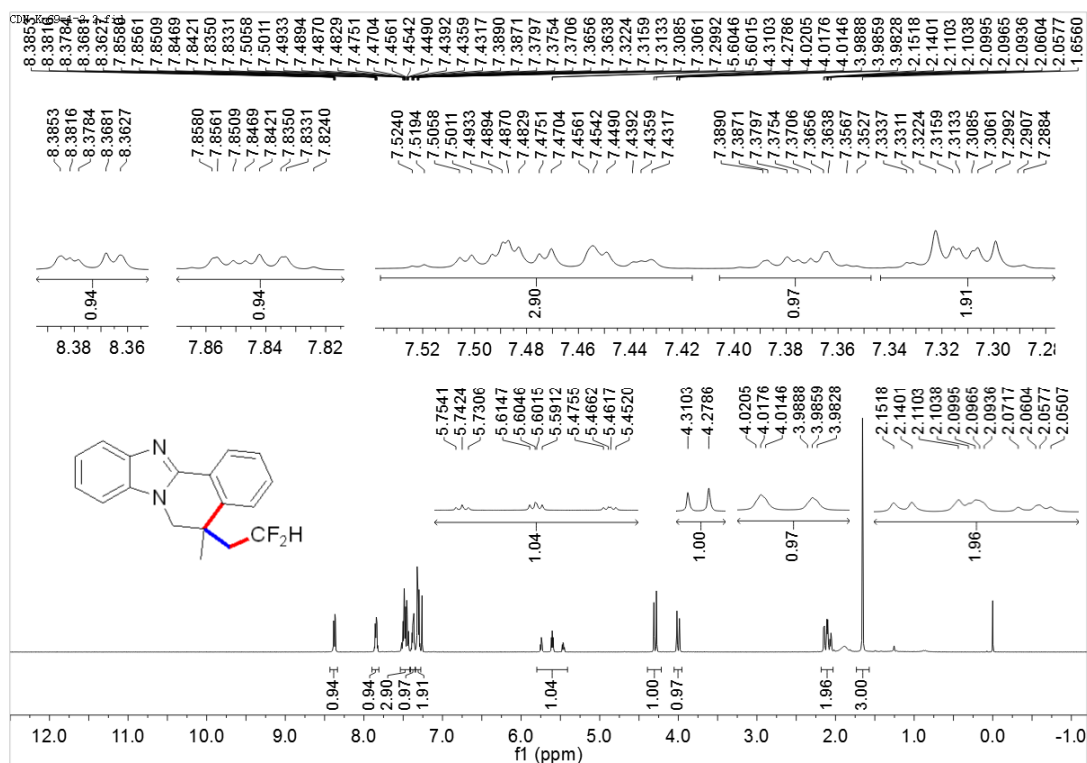



### DEPT 90 and DEPT 135

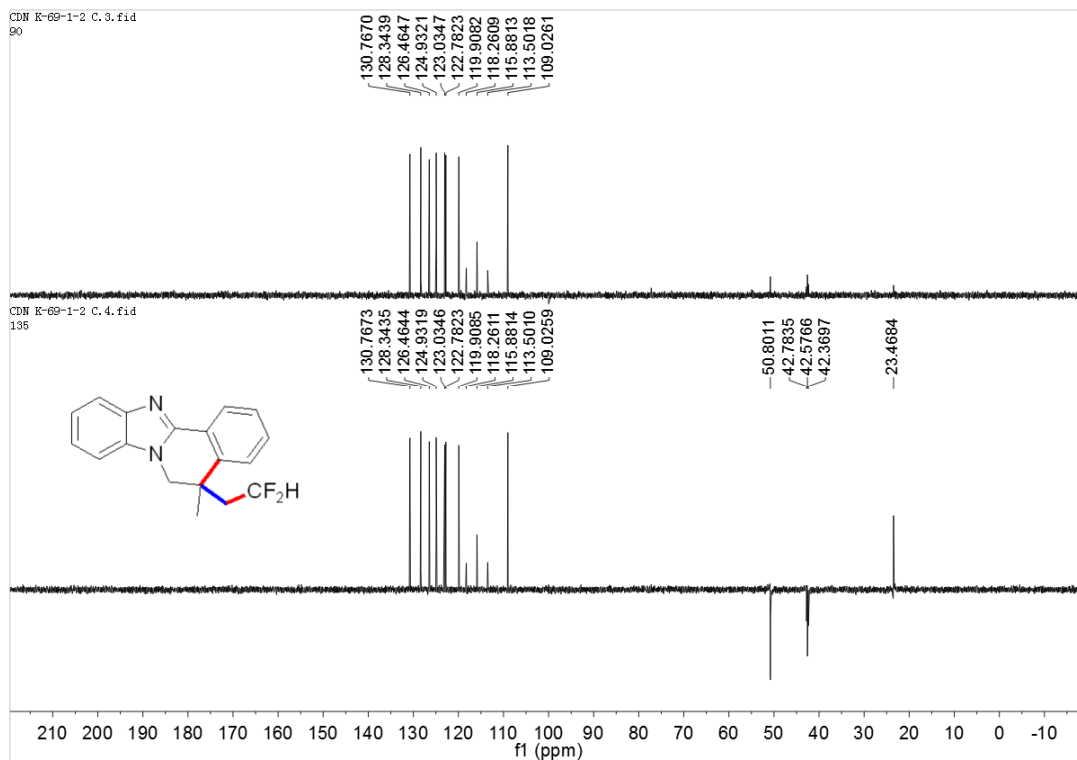

### <sup>19</sup>F NMR

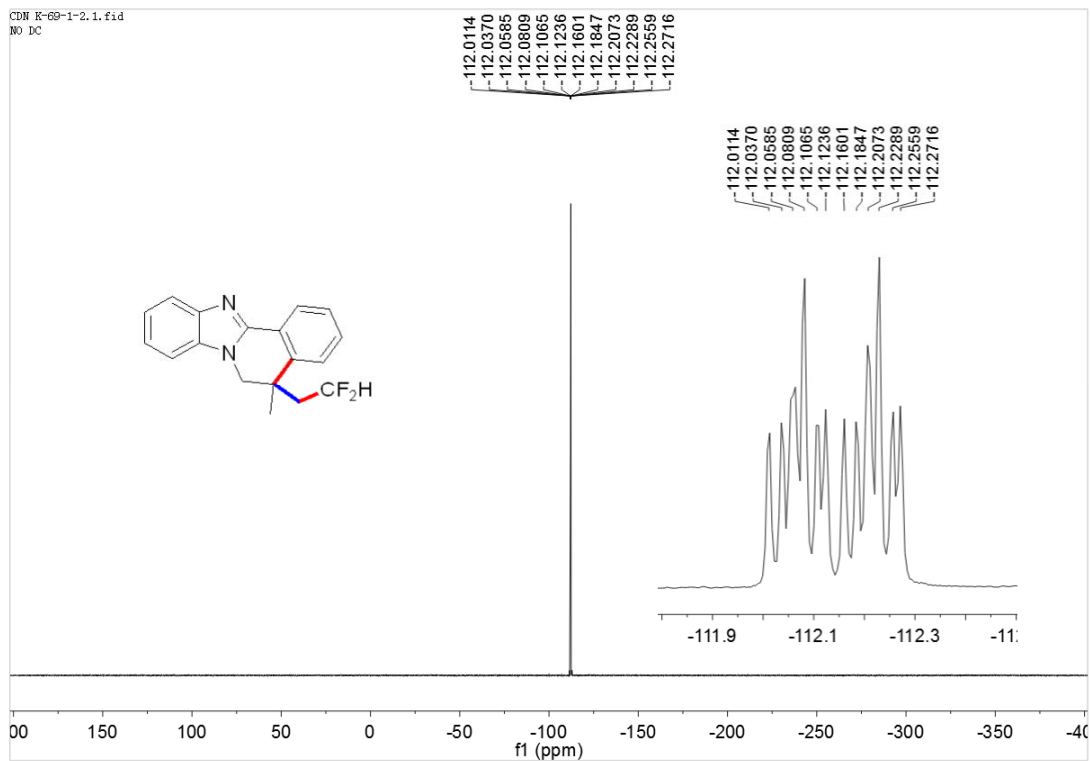

### 3n2, <sup>1</sup>H NMR

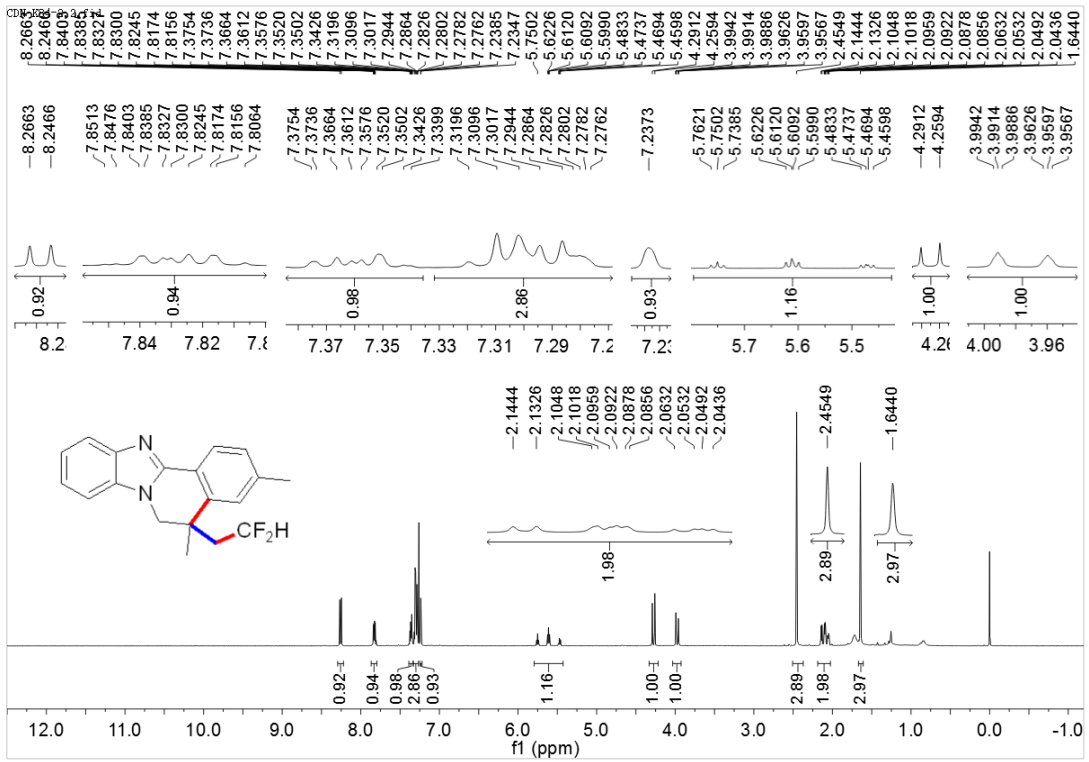

### <sup>13</sup>C NMR

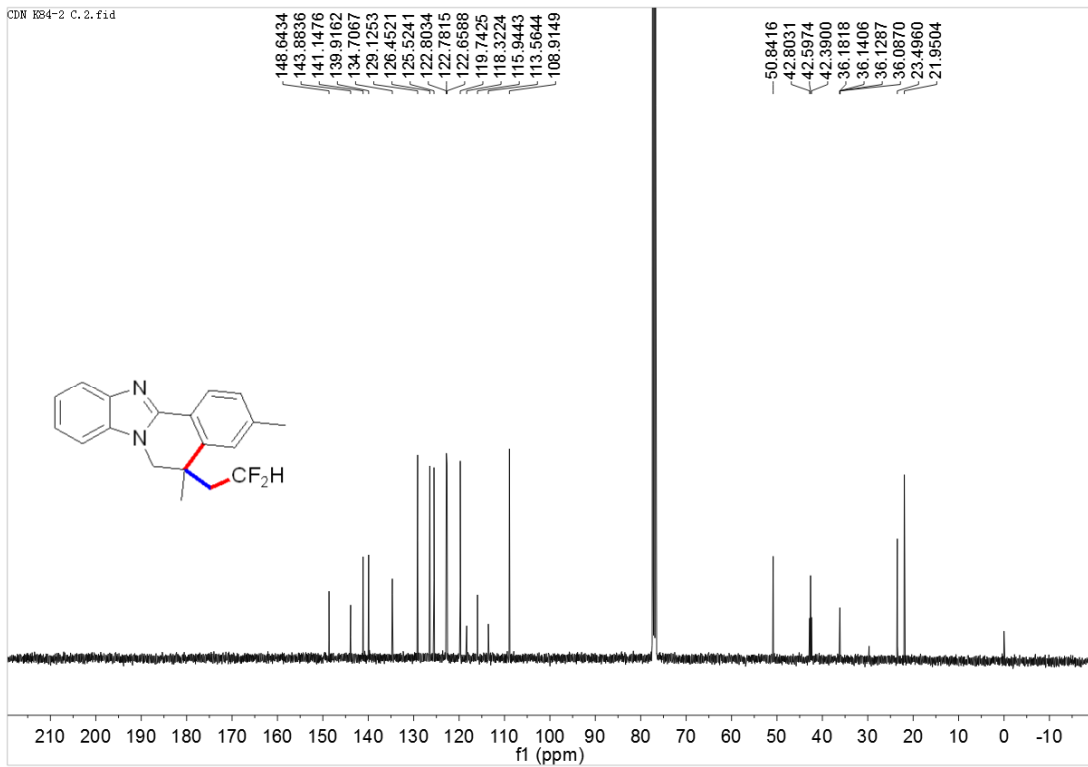

### DEPT 90 and DEPT 135

CDN K84-2 C. 3. fid  
90

129.1246  
126.4510  
125.5245  
122.8027  
122.6577  
119.7420  
118.3228  
115.9438  
113.5641  
108.9146

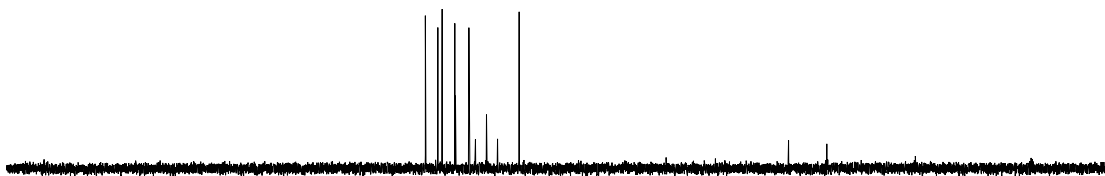

CDN K84-2 C. 4. fid  
135

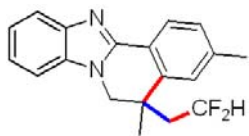

129.1247  
126.4512  
125.5247  
122.8030  
122.6582  
119.7421  
118.3221  
115.9431  
113.5650  
108.9146

50.8413  
42.8016  
42.5954  
42.3895  
23.4949  
21.9512

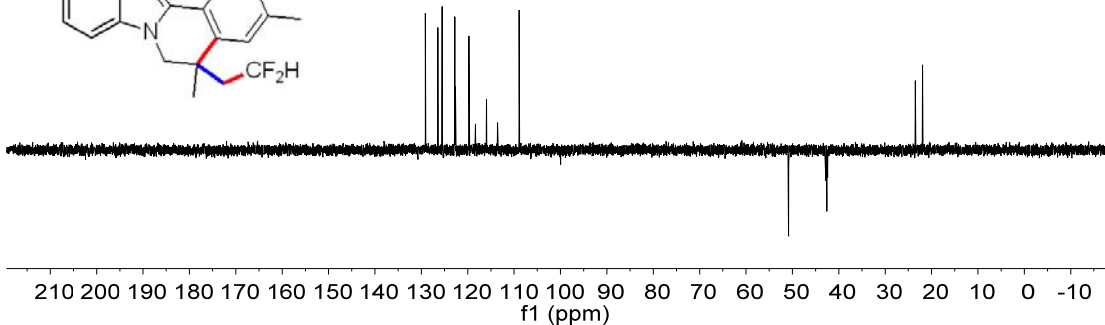

210 200 190 180 170 160 150 140 130 120 110 100 90 80 70 60 50 40 30 20 10 0 -10  
f1 (ppm)

### <sup>19</sup>F NMR

CDN E84-2.1.fid

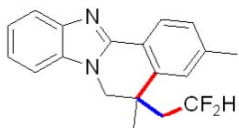

-111.9765  
-112.0171  
-112.0293  
-112.0571  
-112.0738  
-112.0999  
-112.1254  
-112.1613  
-112.1740  
-112.2064  
-112.2240  
-112.2478

111.9765  
112.0171  
112.0293  
112.0571  
112.0738  
112.0999  
112.1254  
112.1613  
112.1740  
112.2064  
112.2240  
112.2478

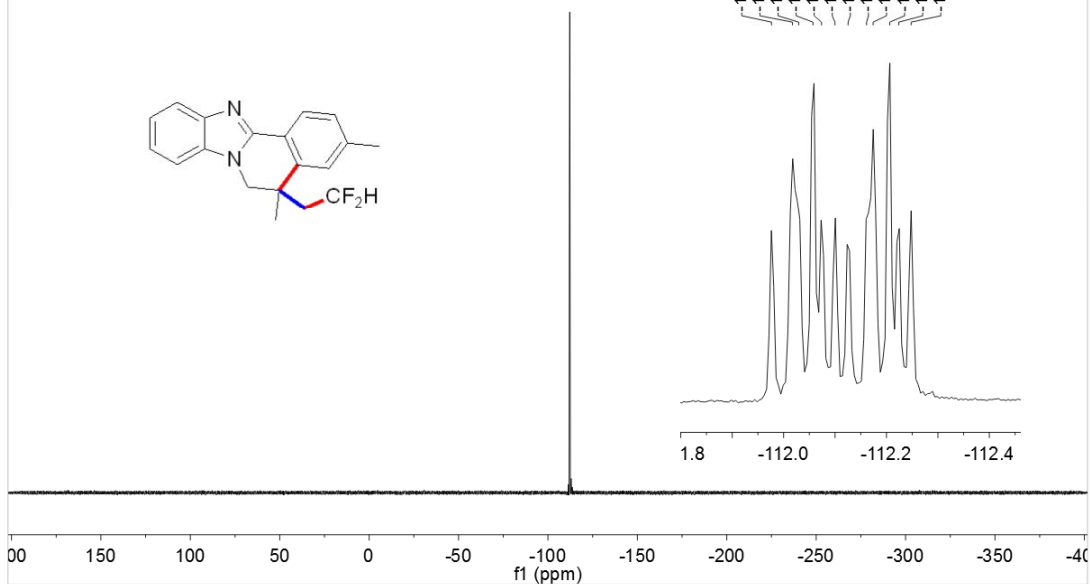

1.8 -112.0 -112.2 -112.4

00 150 100 50 0 -50 -100 -150 -200 -250 -300 -350 -400  
f1 (ppm)

### 3n3, <sup>1</sup>H NMR

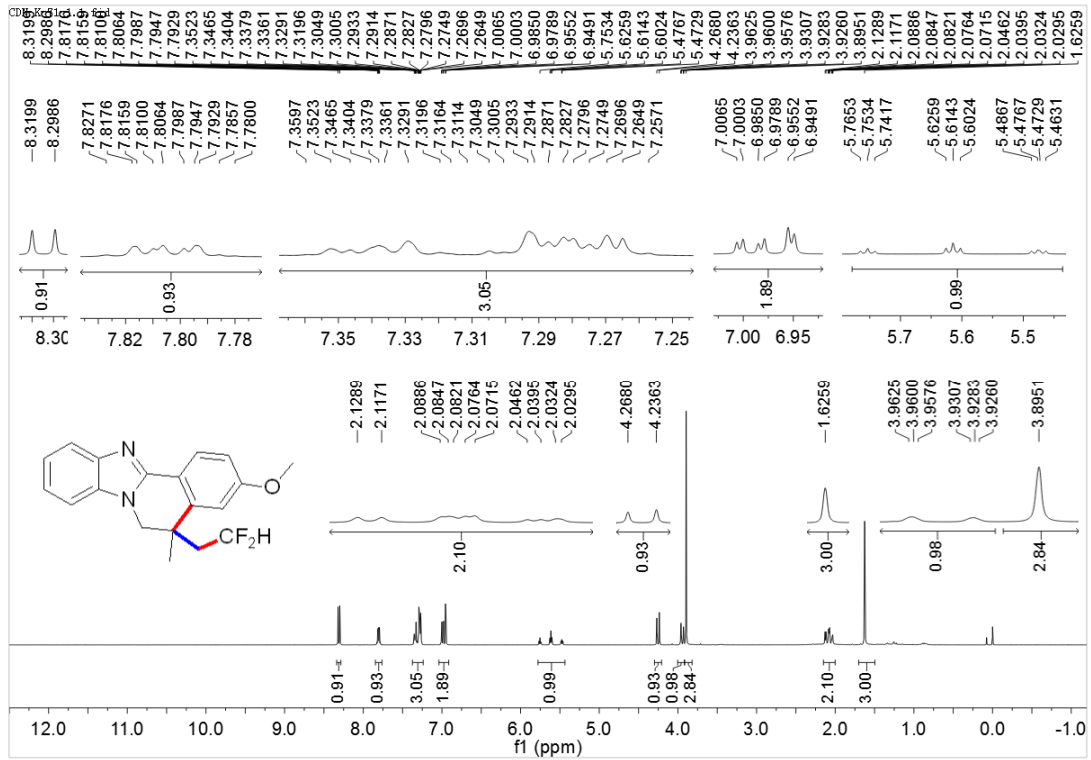

### <sup>13</sup>C NMR

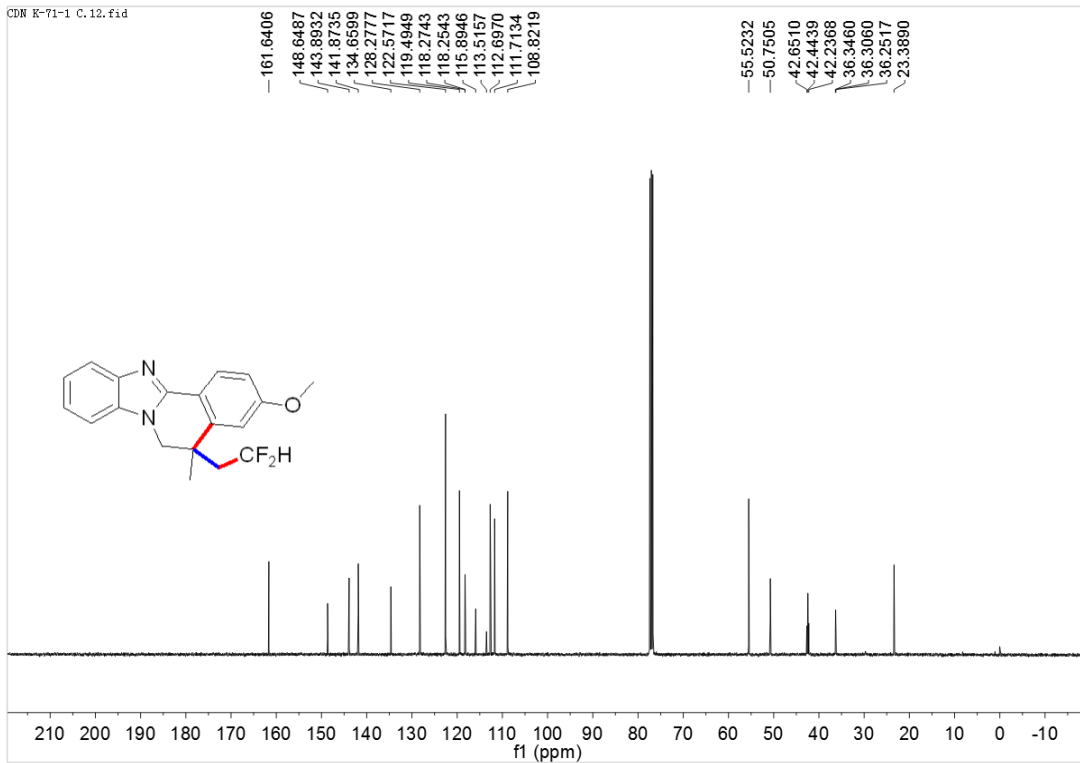

### DEPT 90 and DEPT 135

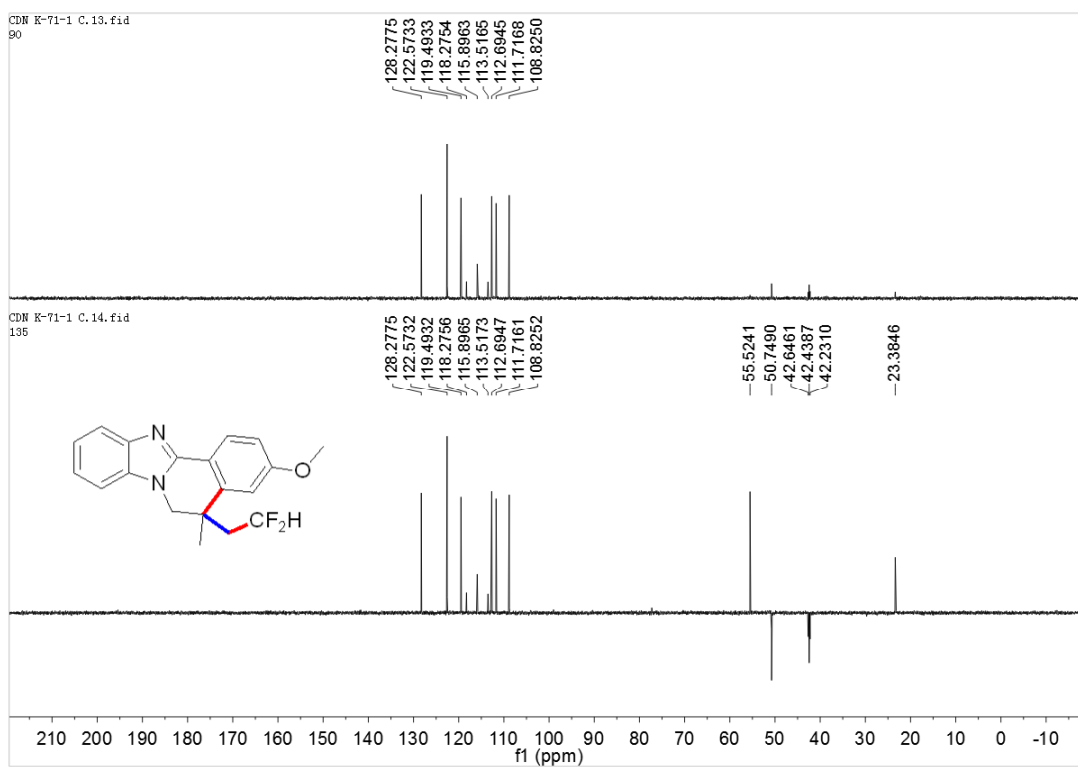

### $^{19}\text{F}$ NMR

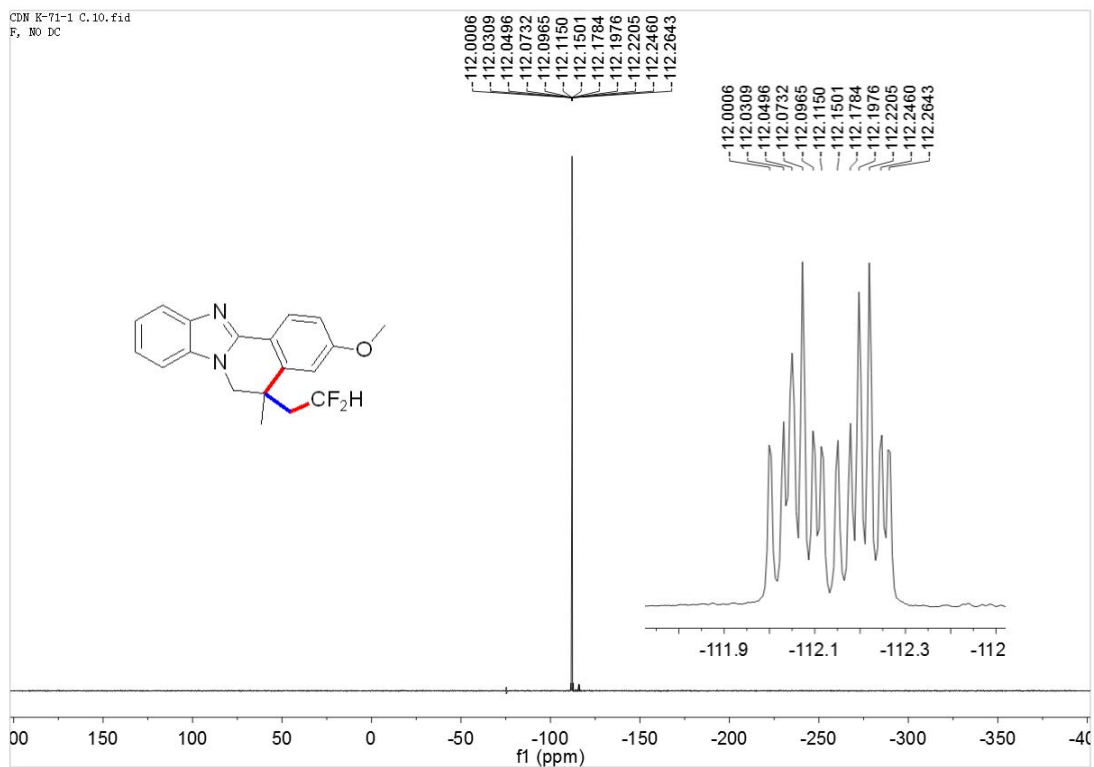

### 3n4, <sup>1</sup>H NMR

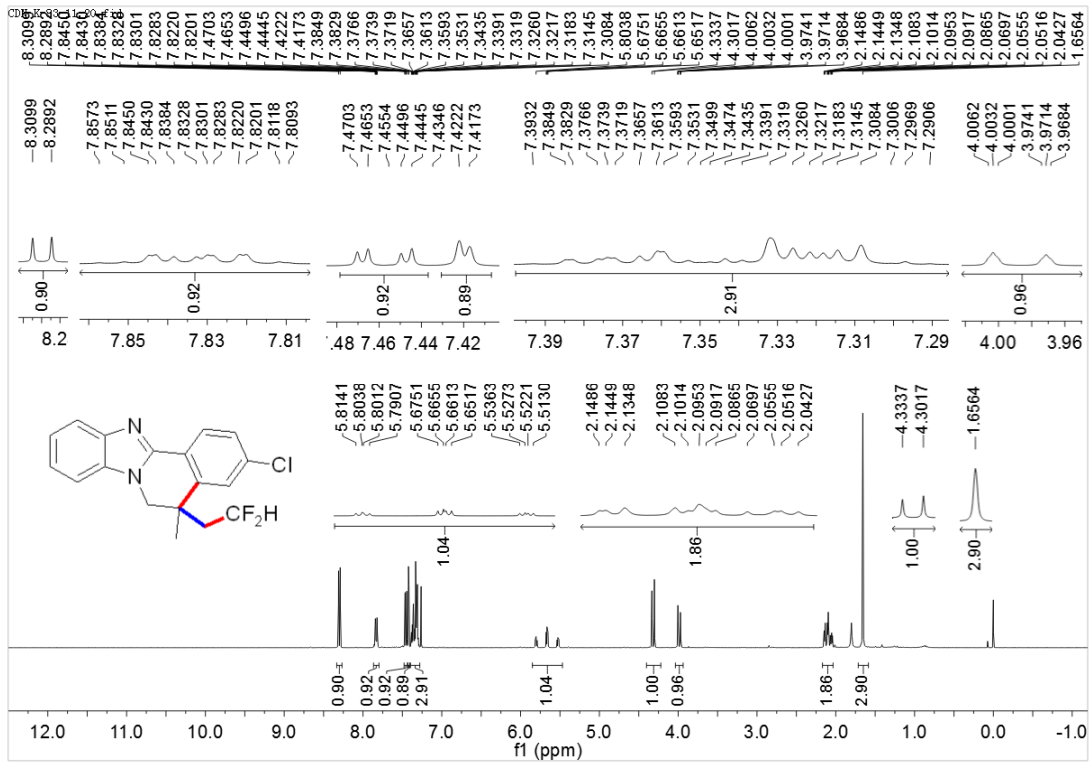

### <sup>13</sup>C NMR

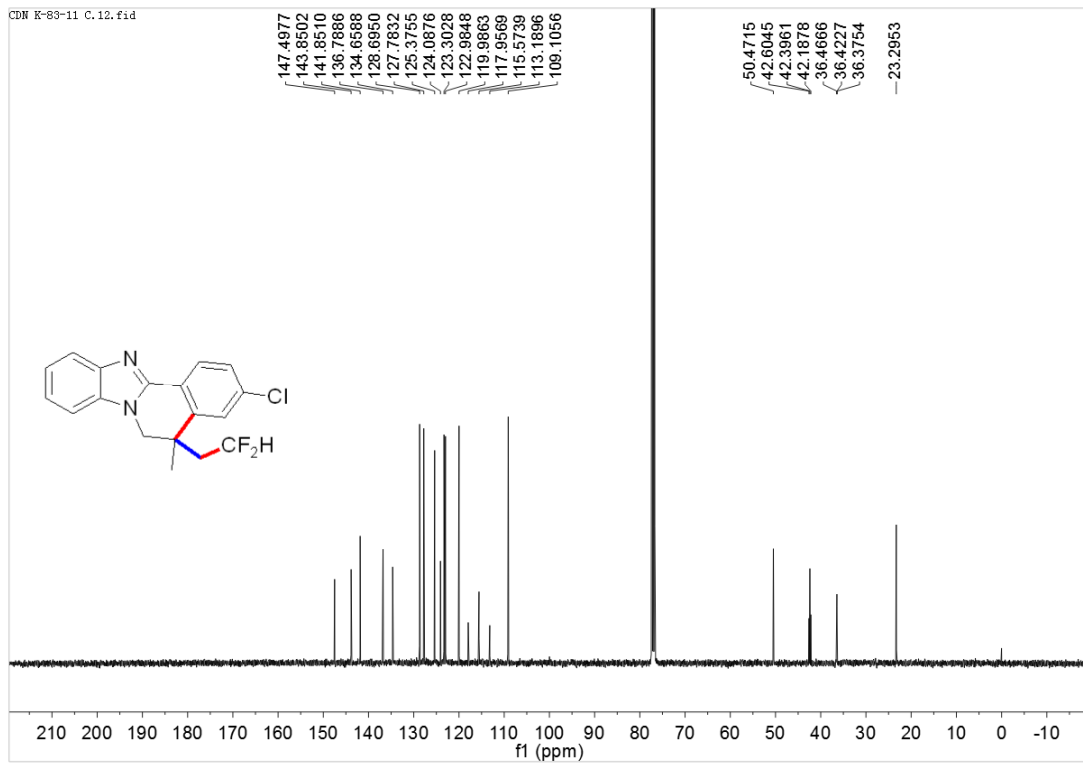

### DEPT 90 and DEPT 135

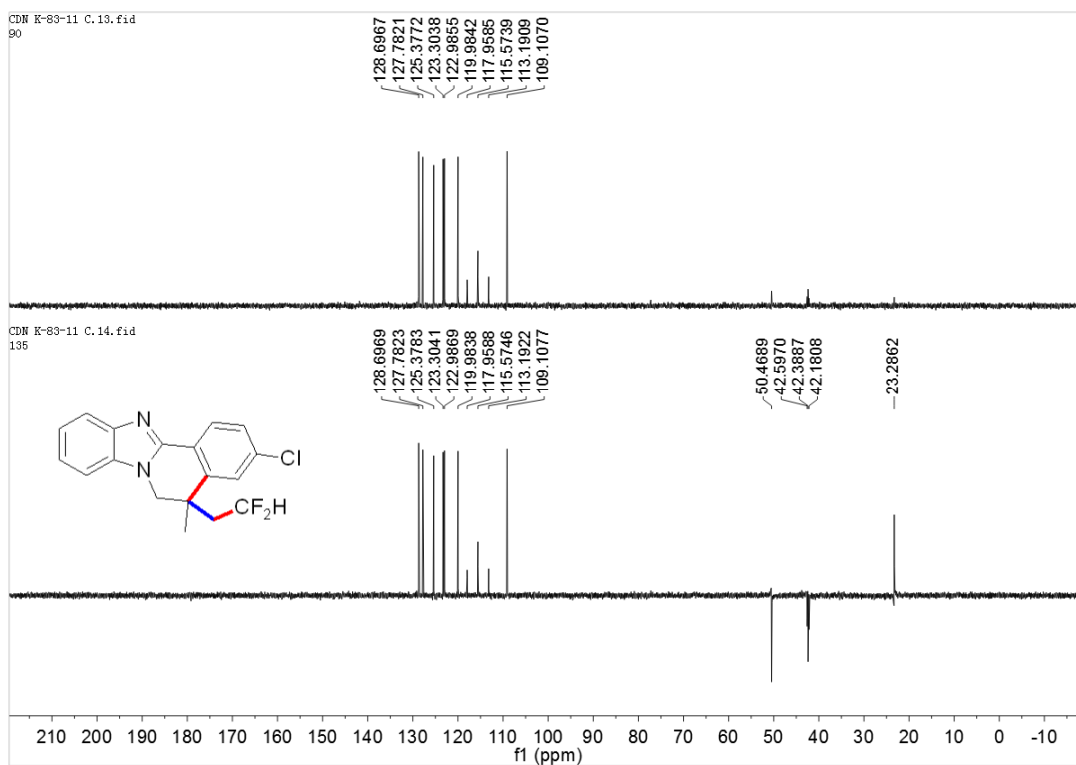

### <sup>19</sup>F NMR

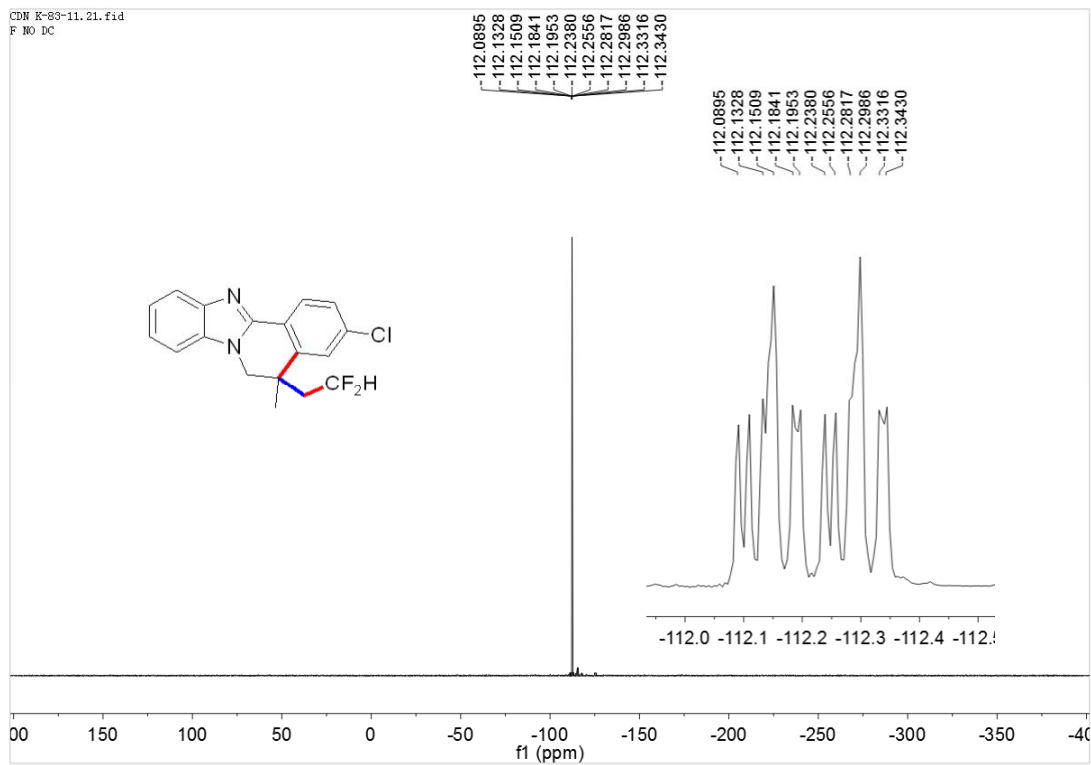

### 3n5, <sup>1</sup>H NMR

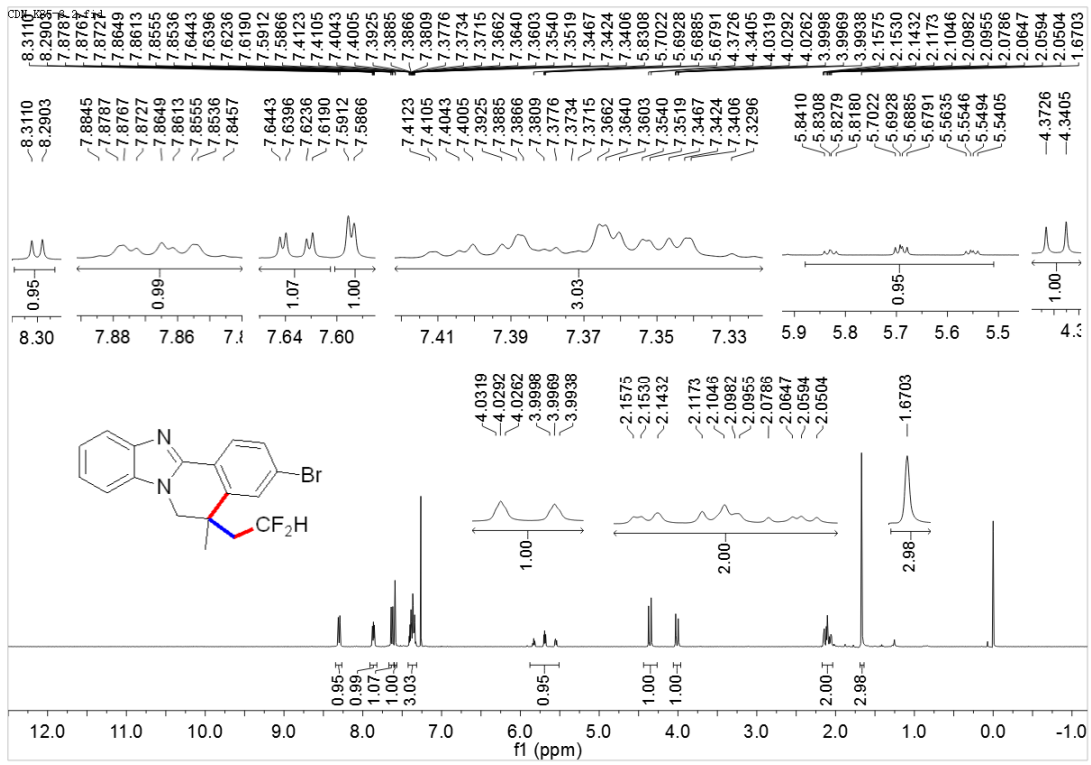

### <sup>13</sup>C NMR

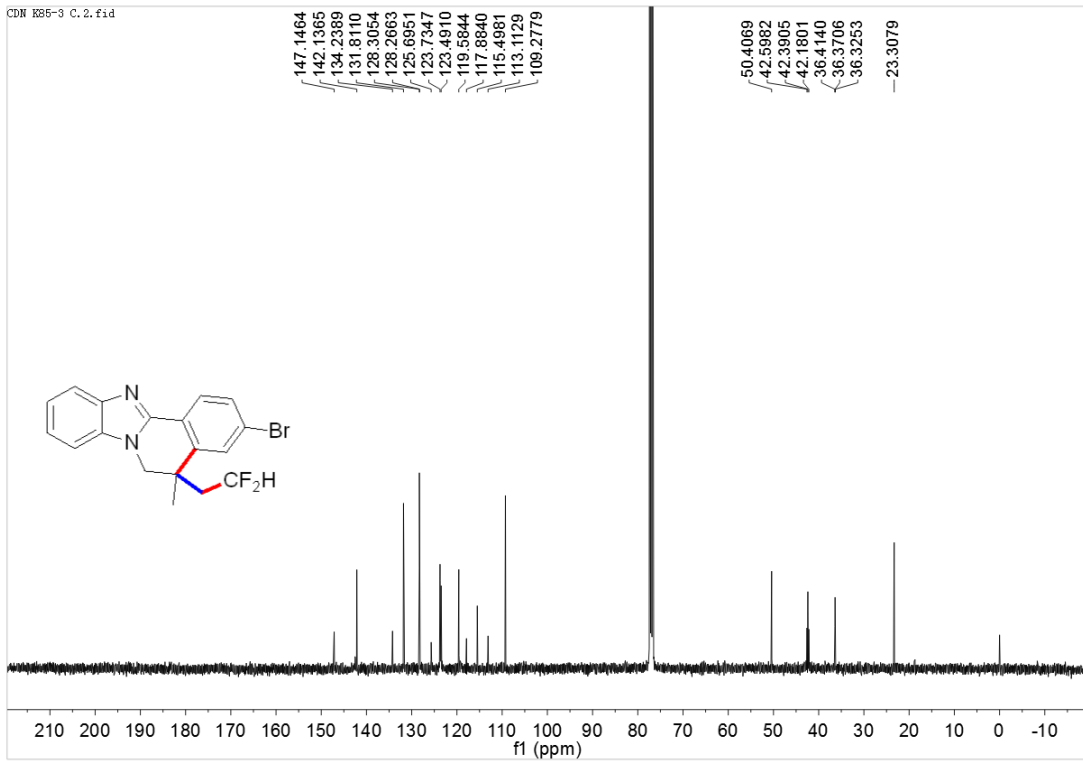



### DEPT 90 and DEPT 135

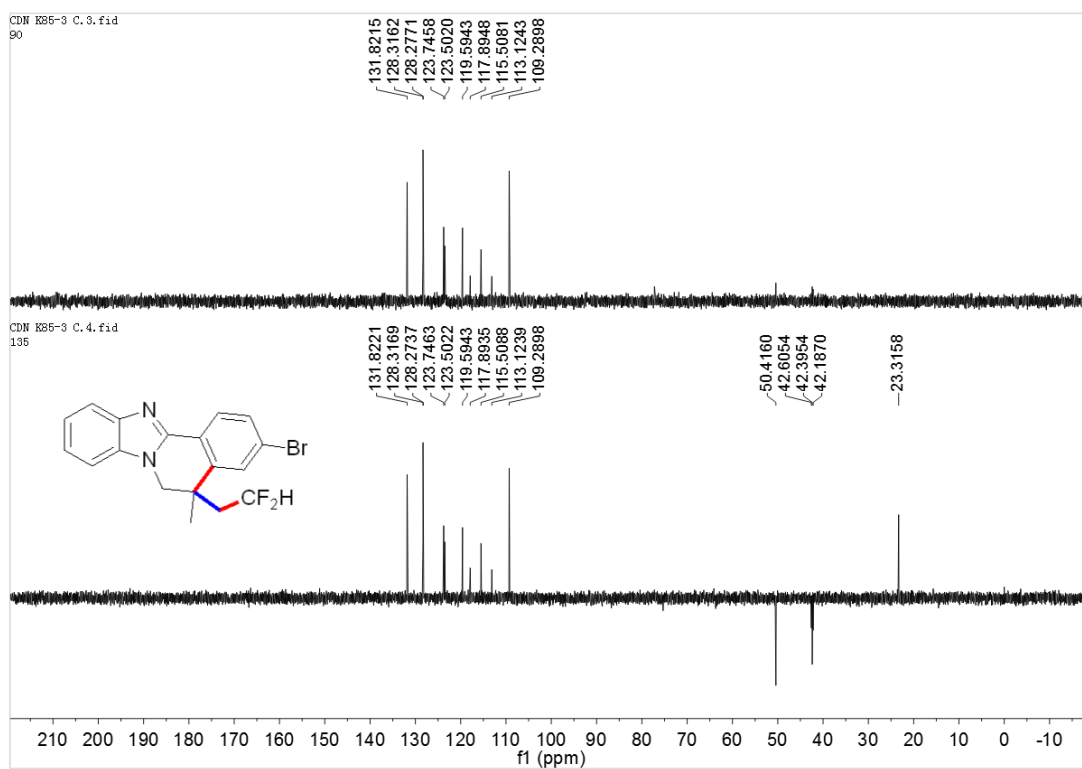

### <sup>19</sup>F NMR

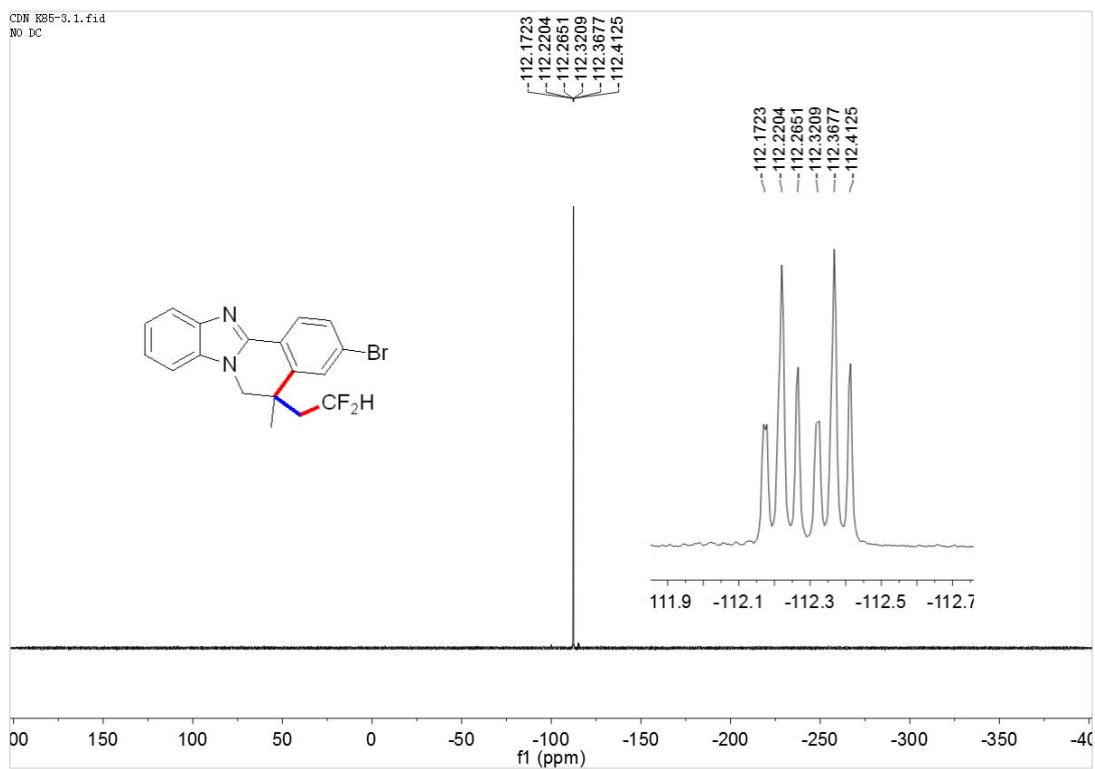

### 3o1, <sup>1</sup>H NMR

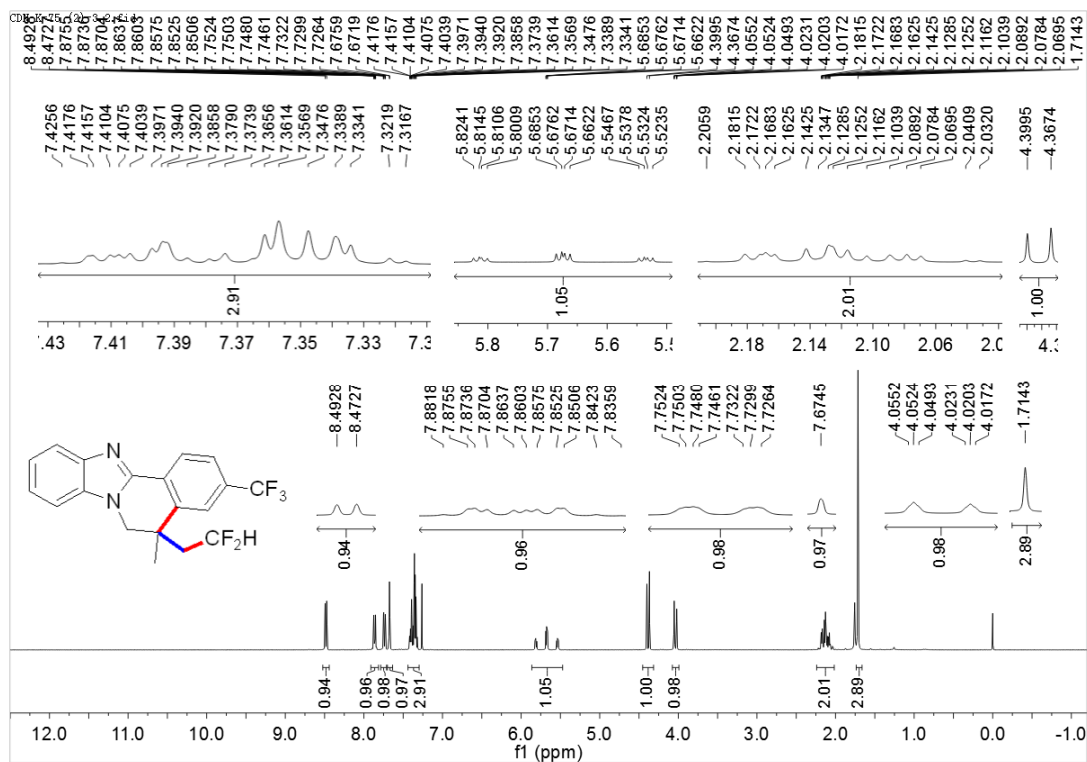

### <sup>13</sup>C NMR

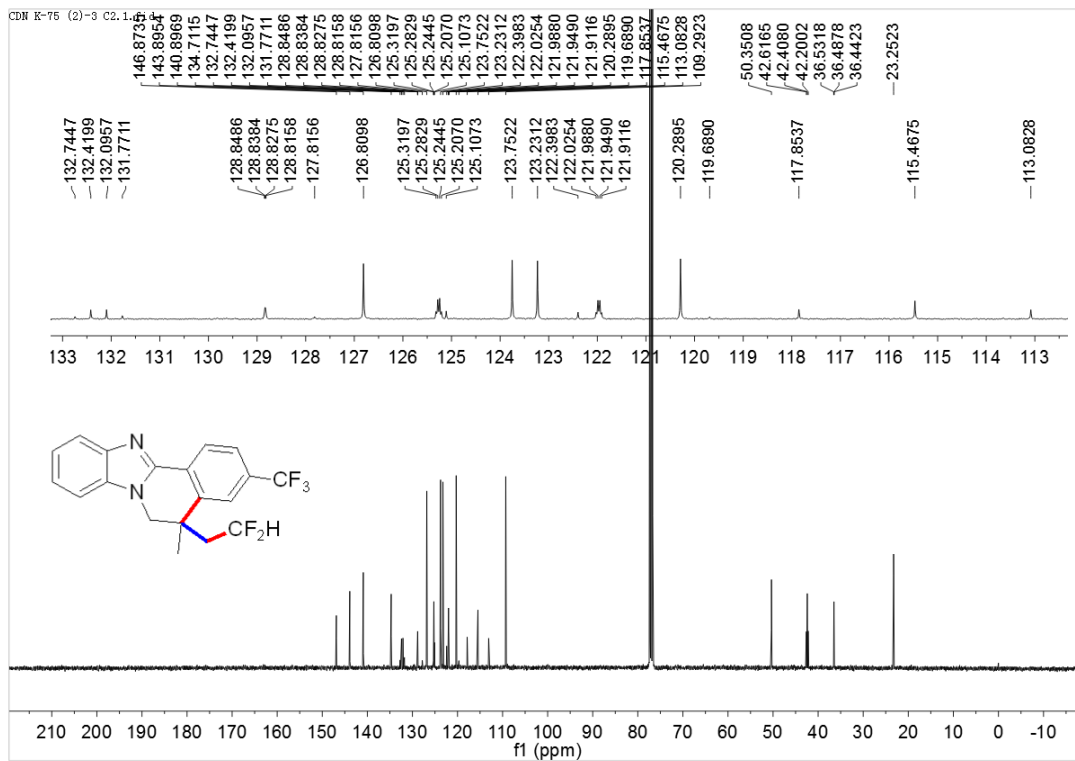

### DEPT 90 and DEPT 135

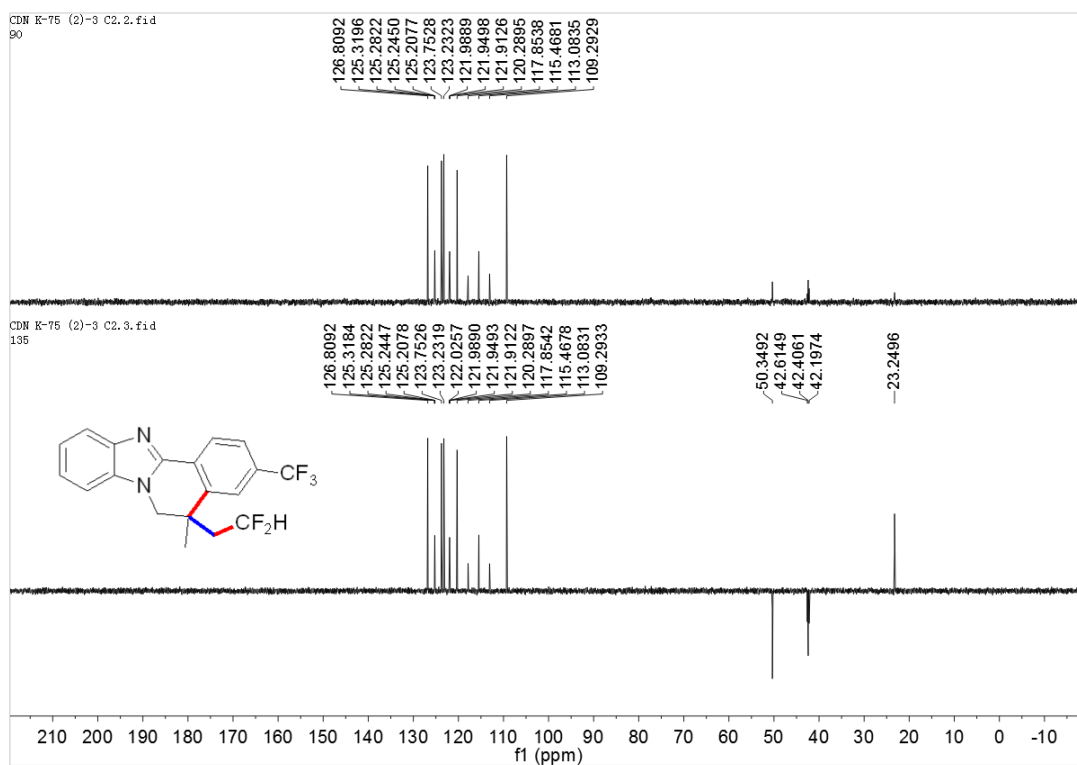

### <sup>19</sup>F NMR

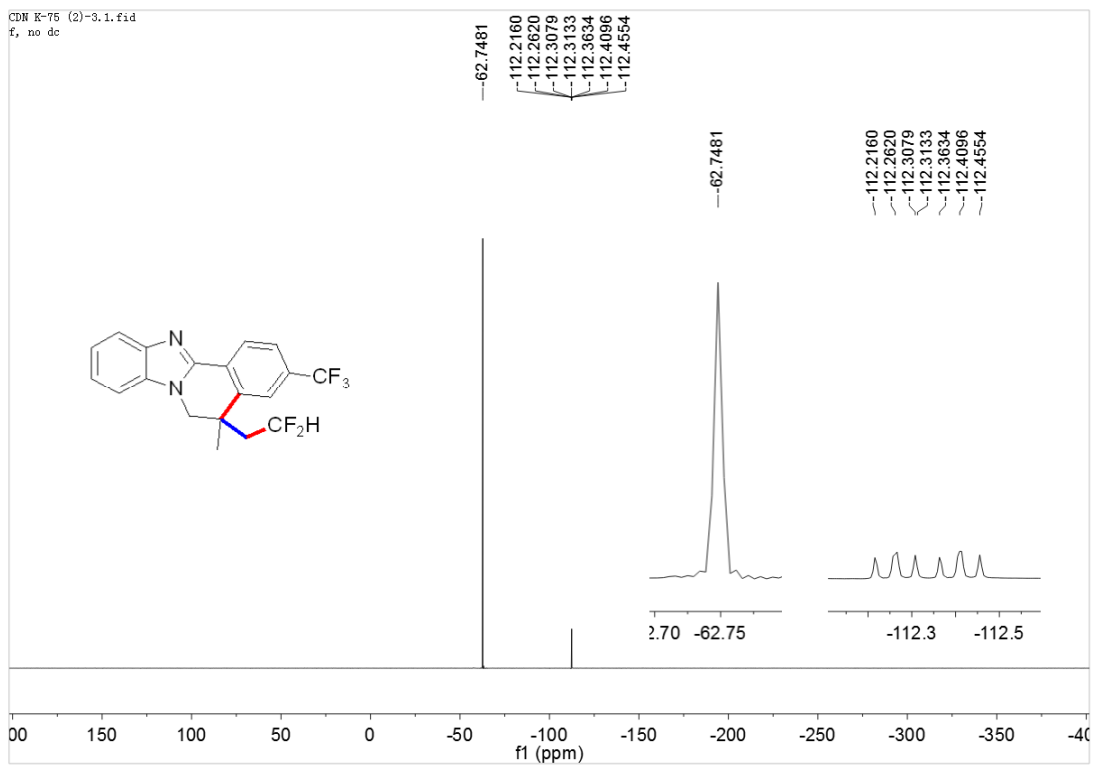

### 302, <sup>1</sup>H NMR

CDN K-82-1 C. 20. f1d

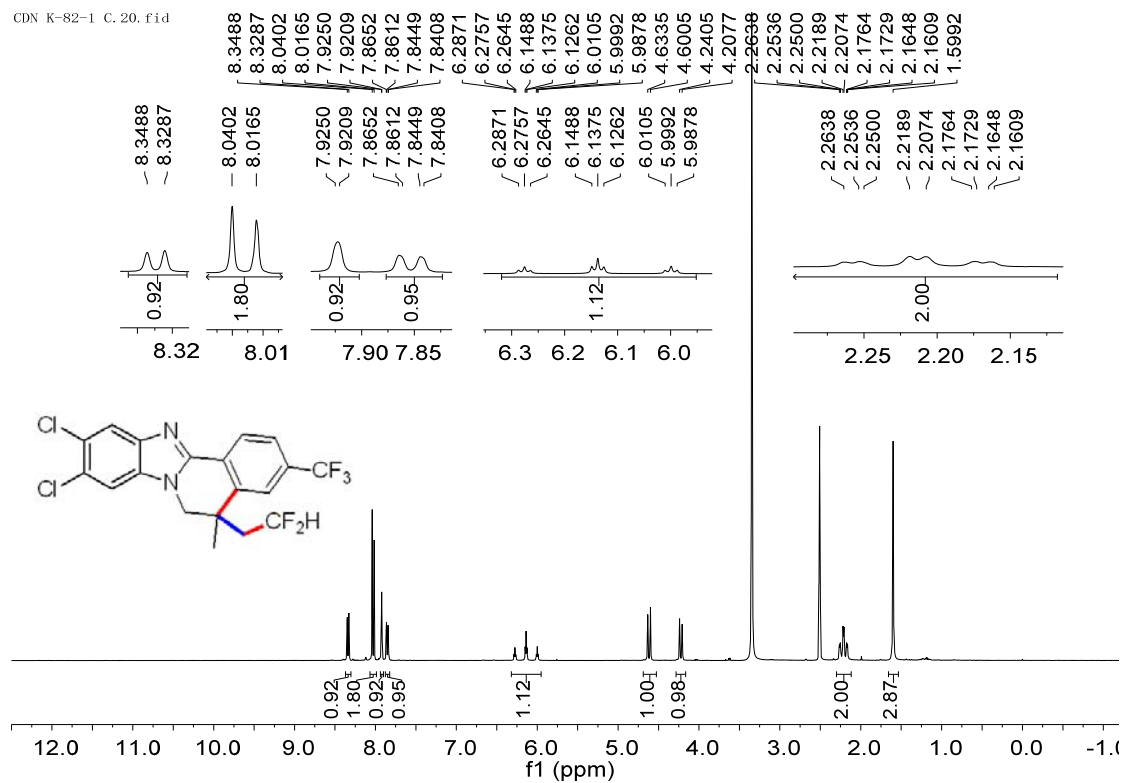

### <sup>13</sup>C NMR

CDN K-82-1 C. 20. f1d

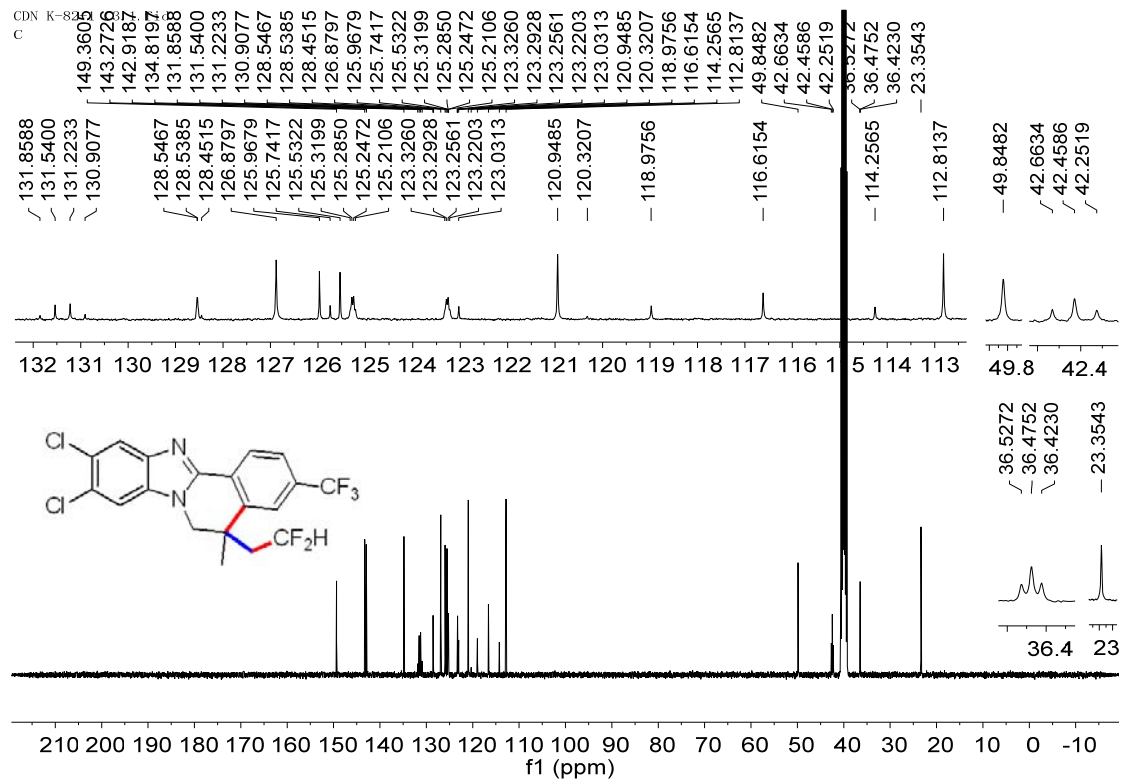

# <sup>19</sup>F NMR

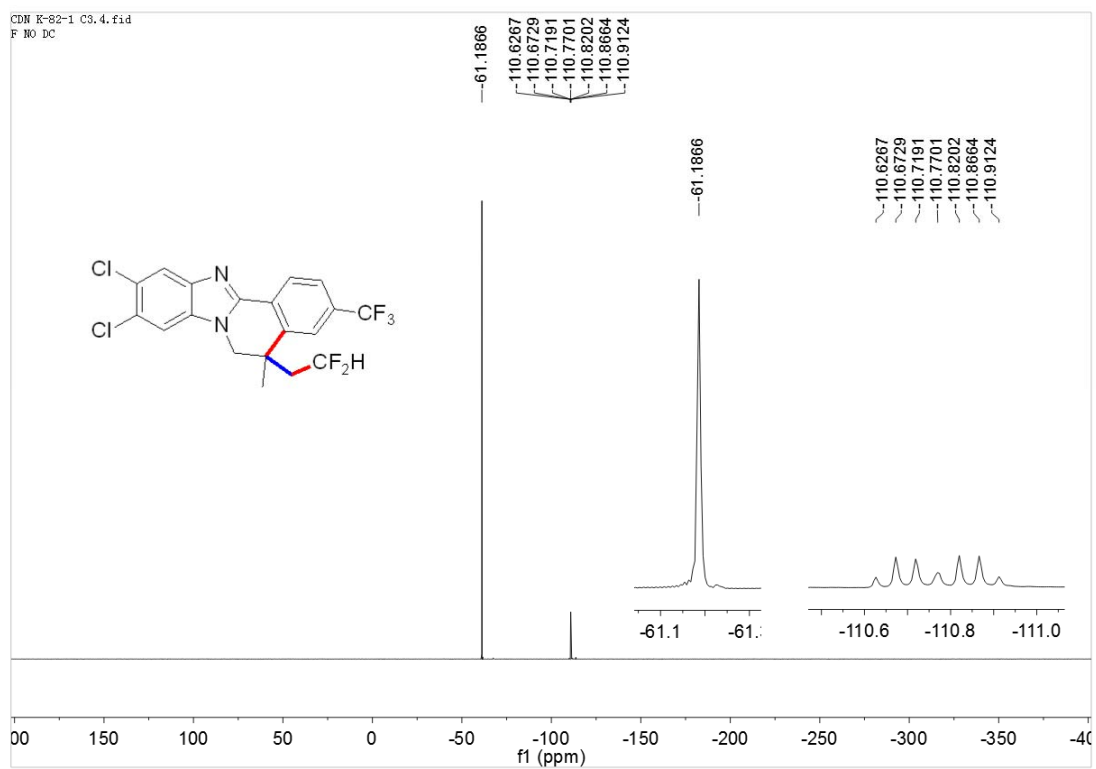

### 5a1, <sup>1</sup>H NMR

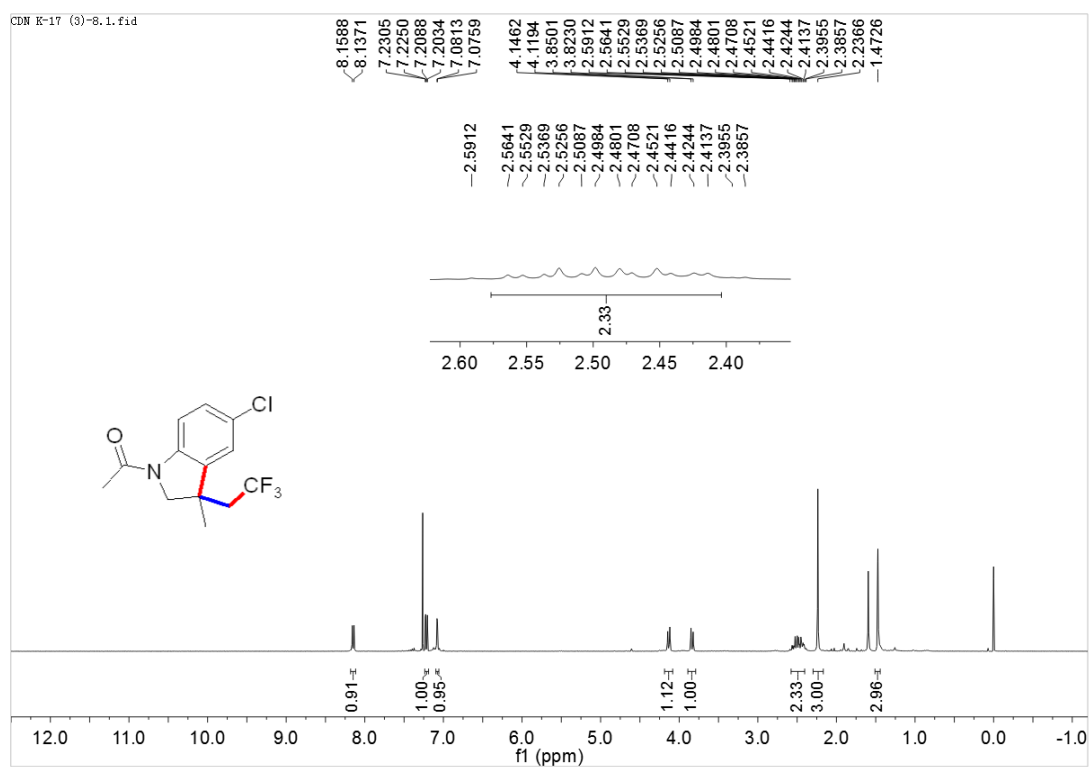

### <sup>13</sup>C NMR

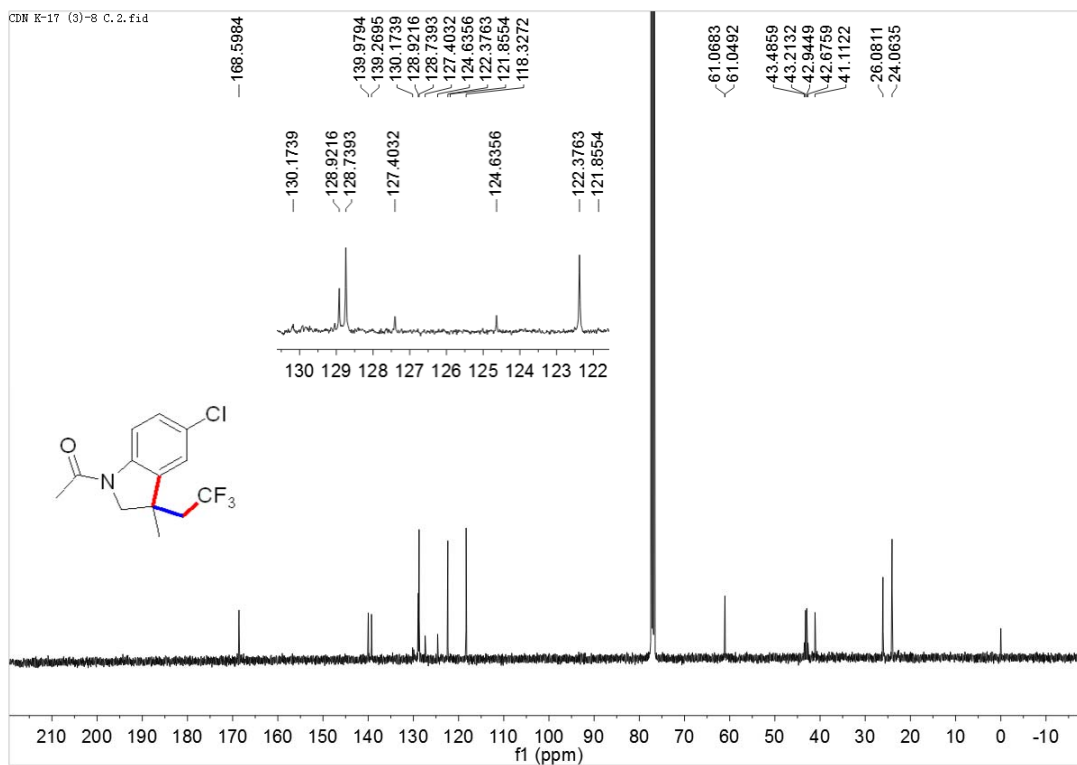

## DEPT 90 and DEPT 135

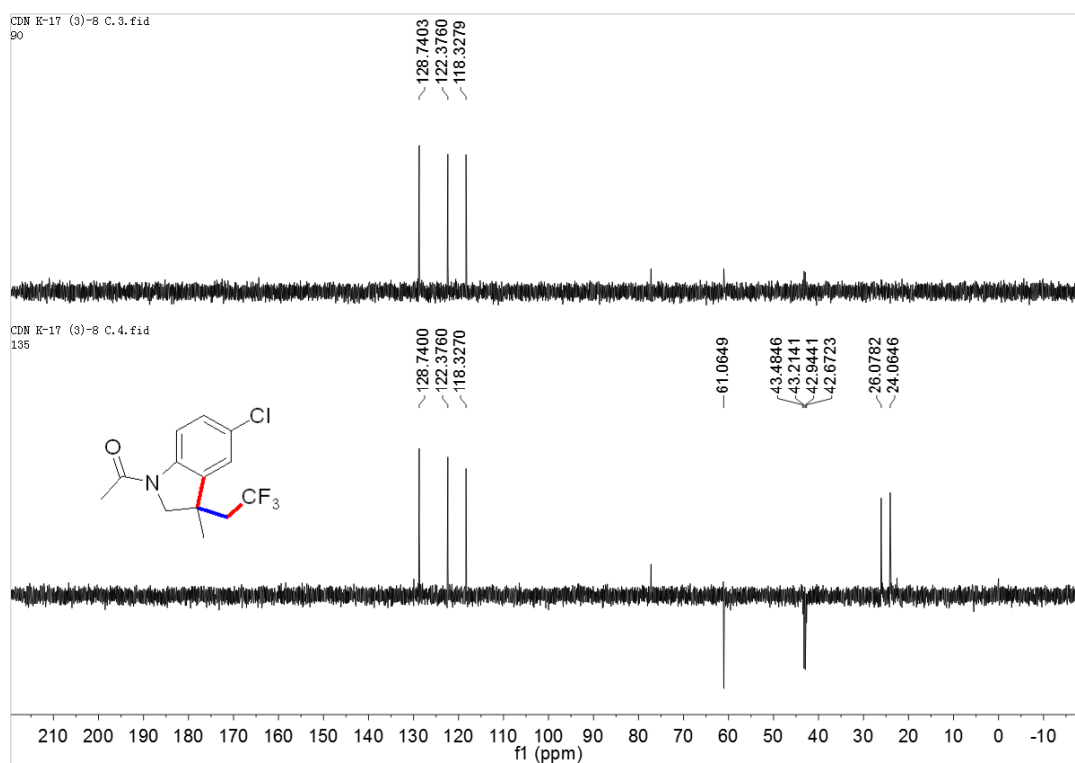

## <sup>19</sup>F NMR

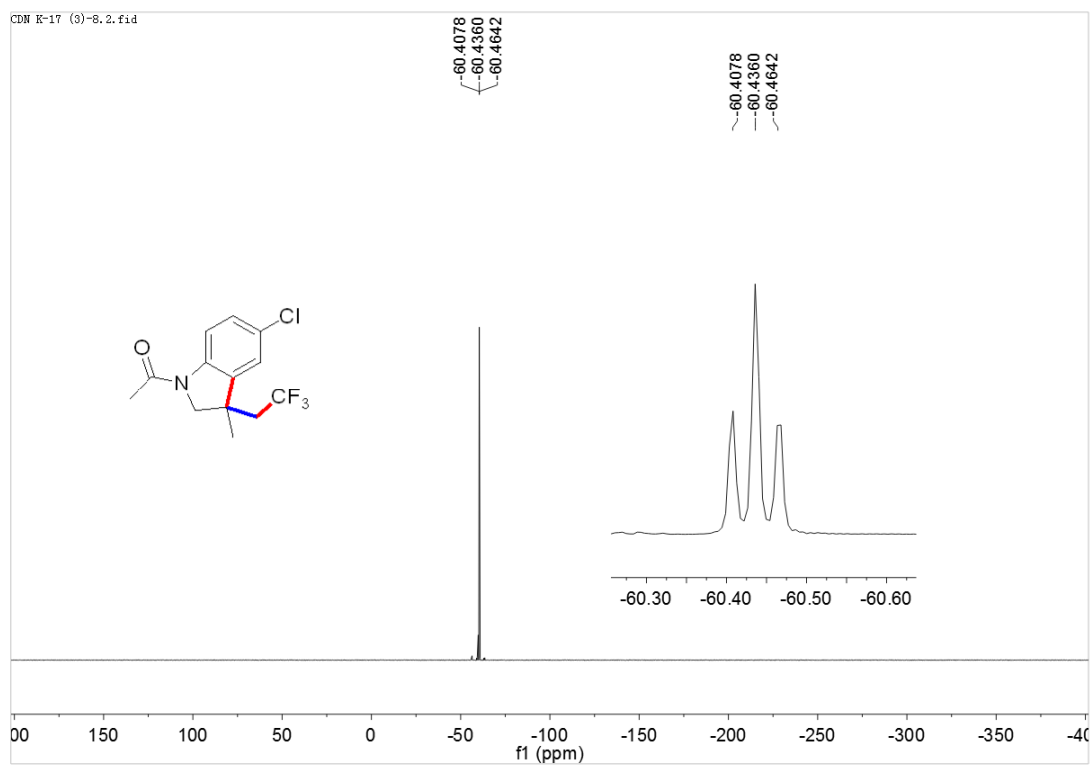

### 5a2, <sup>1</sup>H NMR

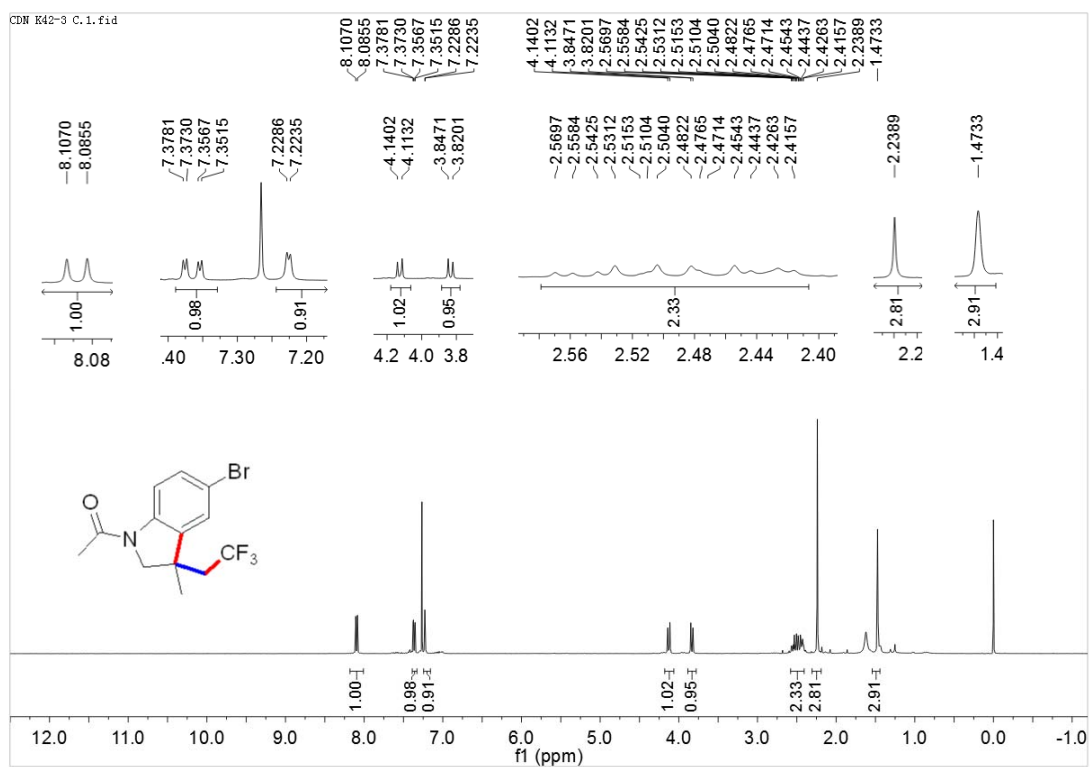

### <sup>13</sup>C NMR

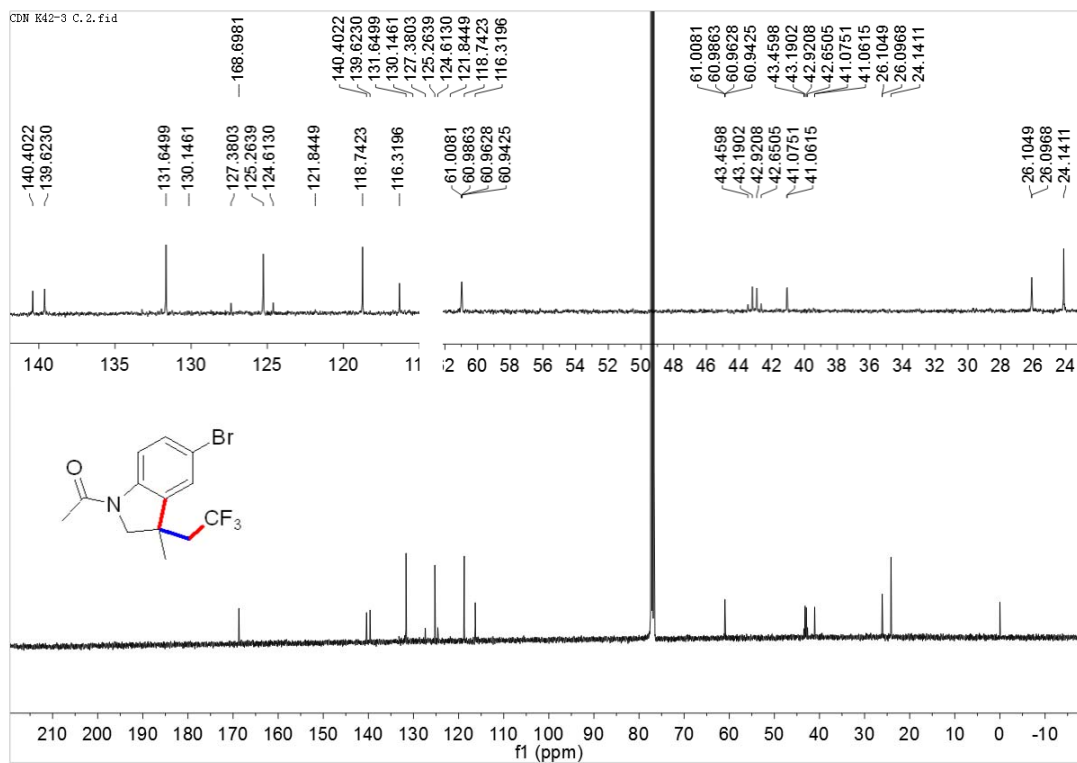



### DEPT 90 and DEPT 135

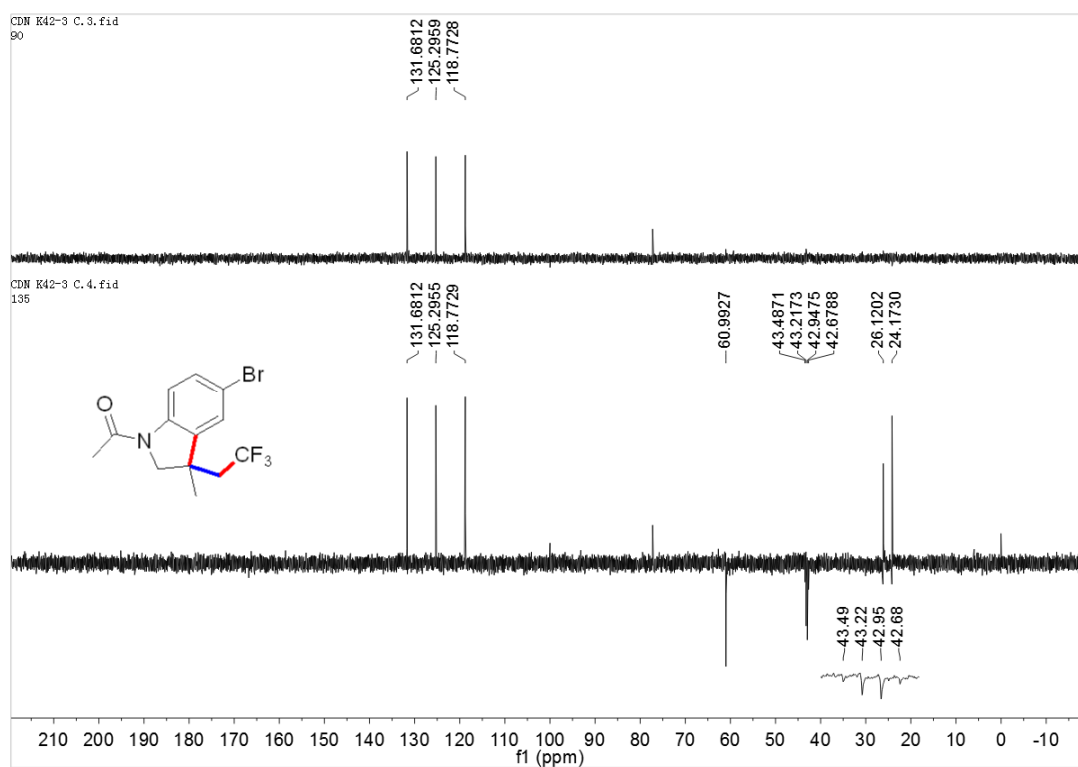

### <sup>19</sup>F NMR

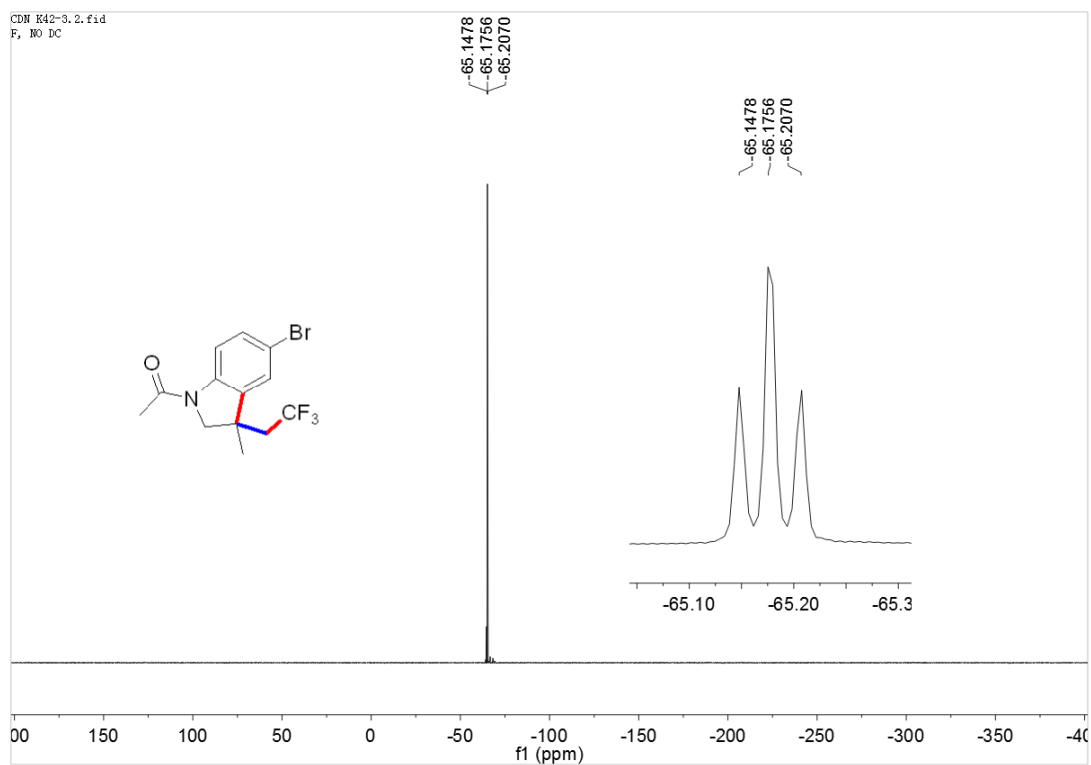

### 5b, <sup>1</sup>H NMR

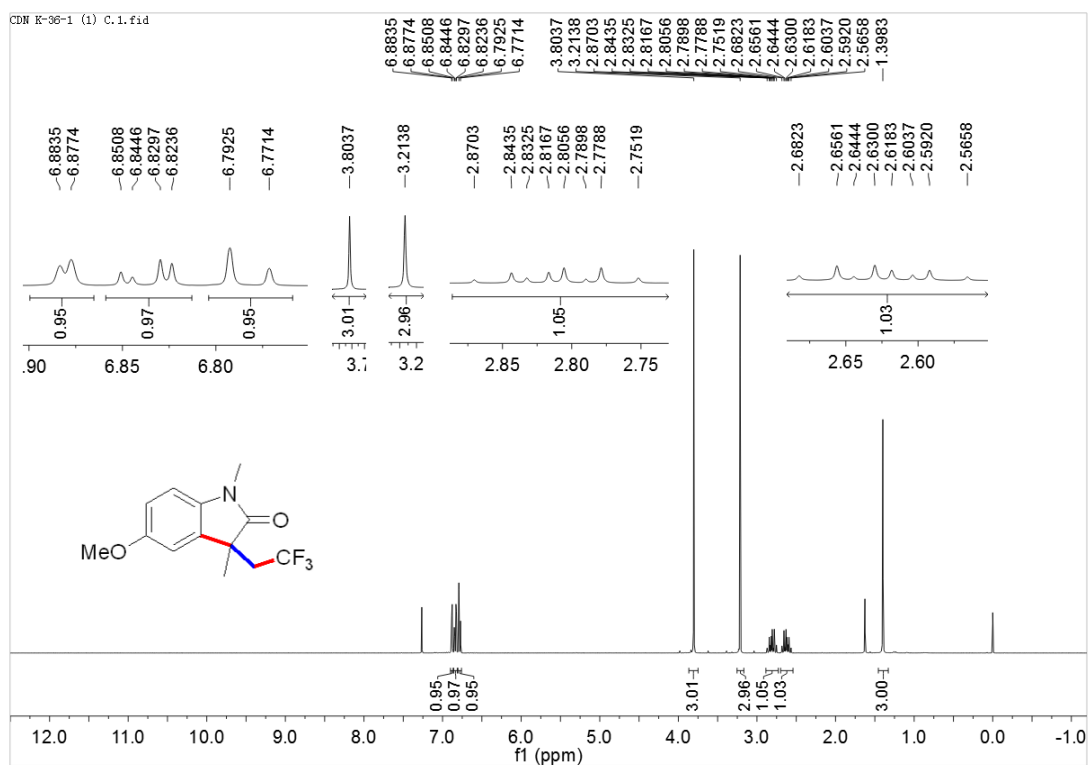

### <sup>13</sup>C NMR

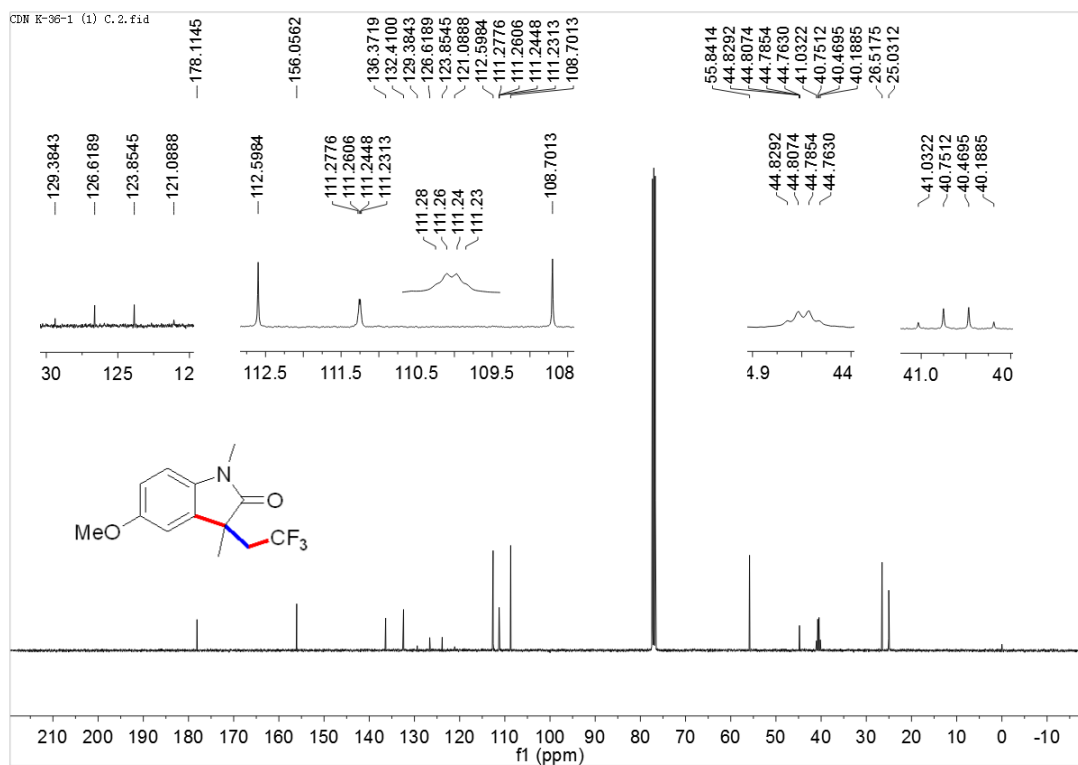

## DEPT 90 and DEPT 135

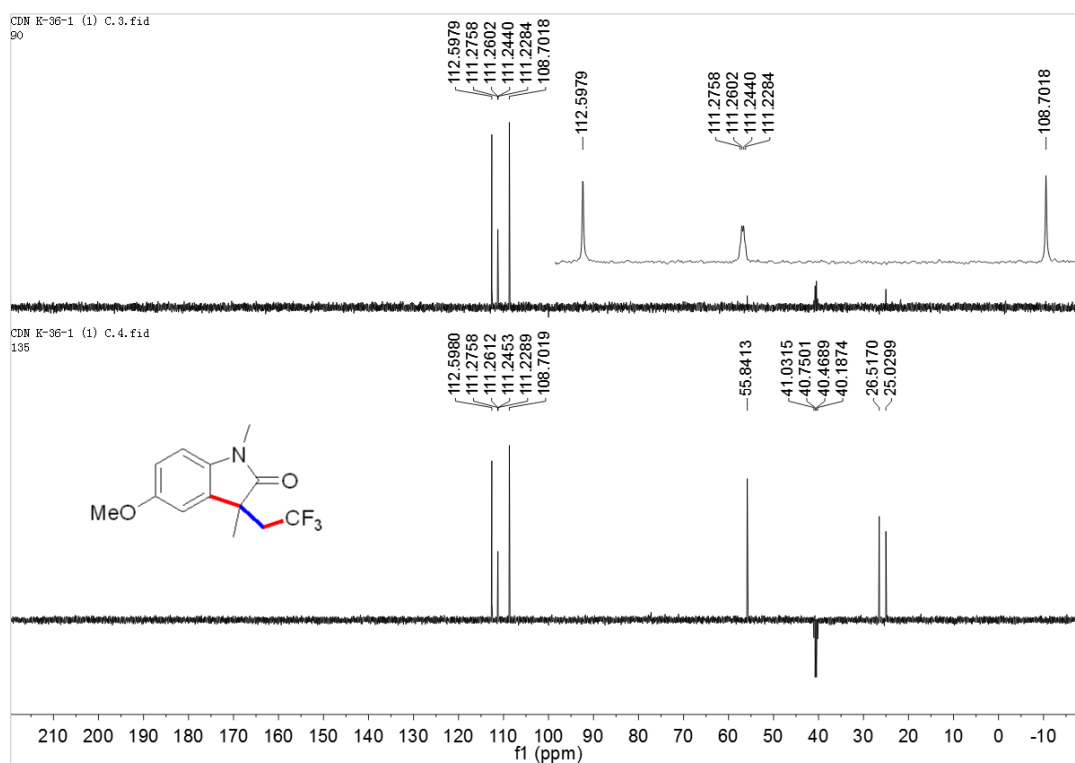

## <sup>19</sup>F NMR

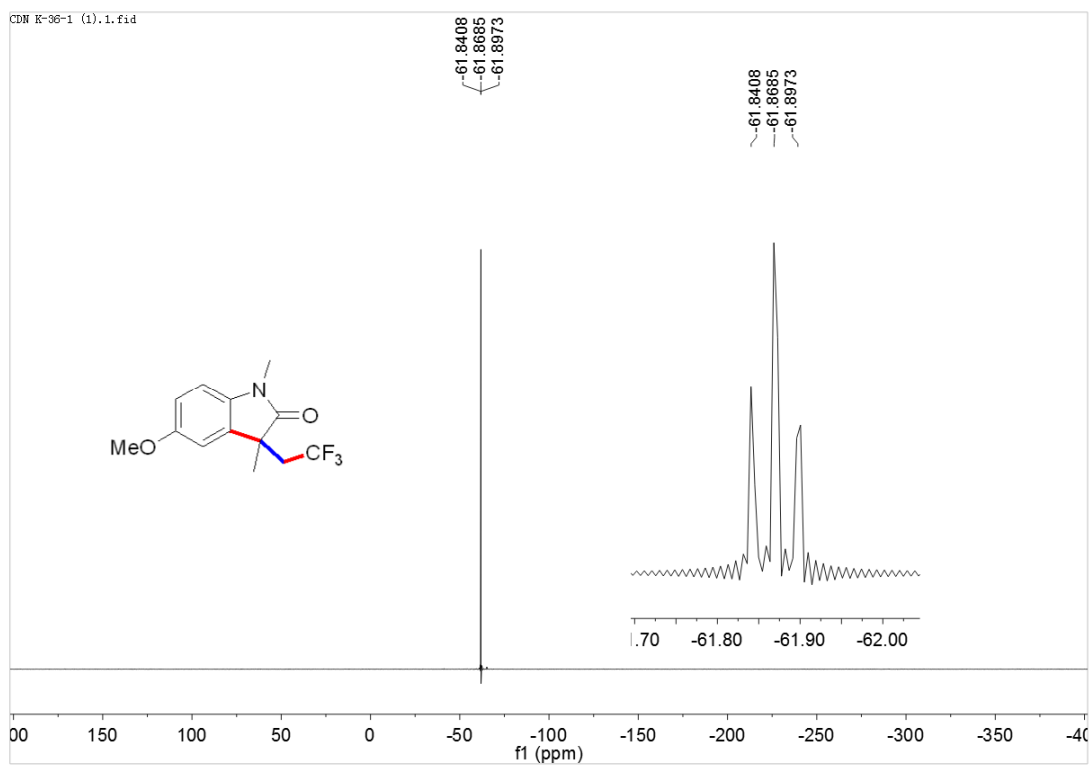

### 5c, <sup>1</sup>H NMR

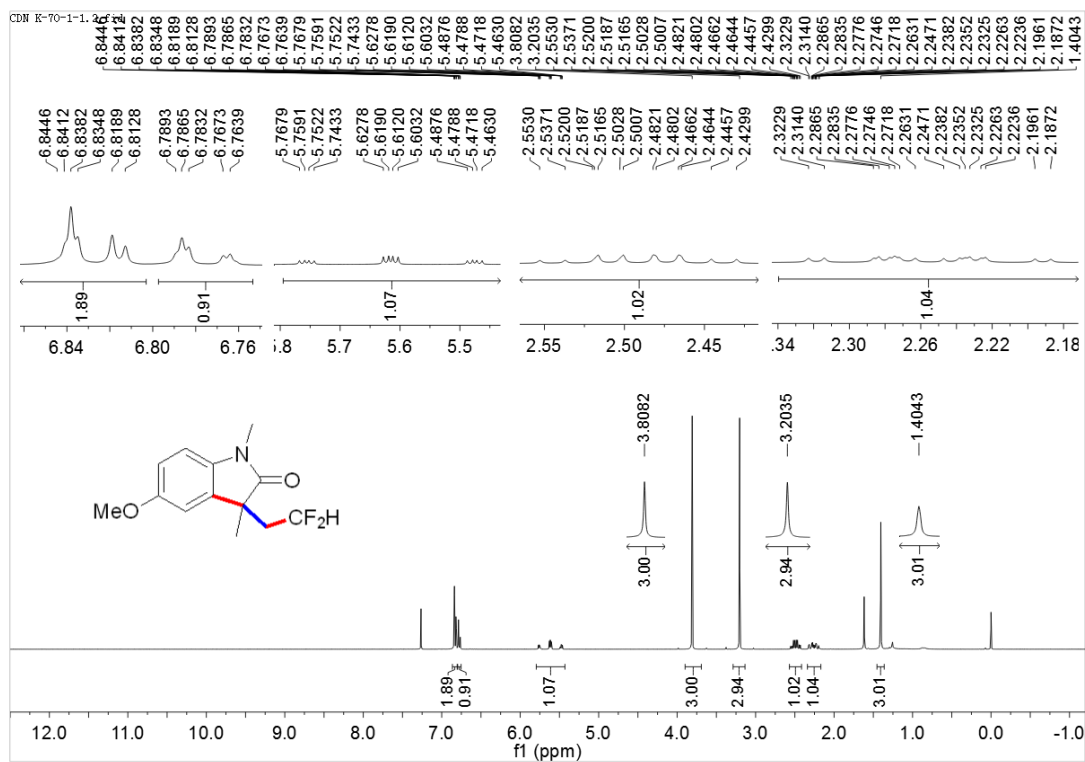

### <sup>13</sup>C NMR

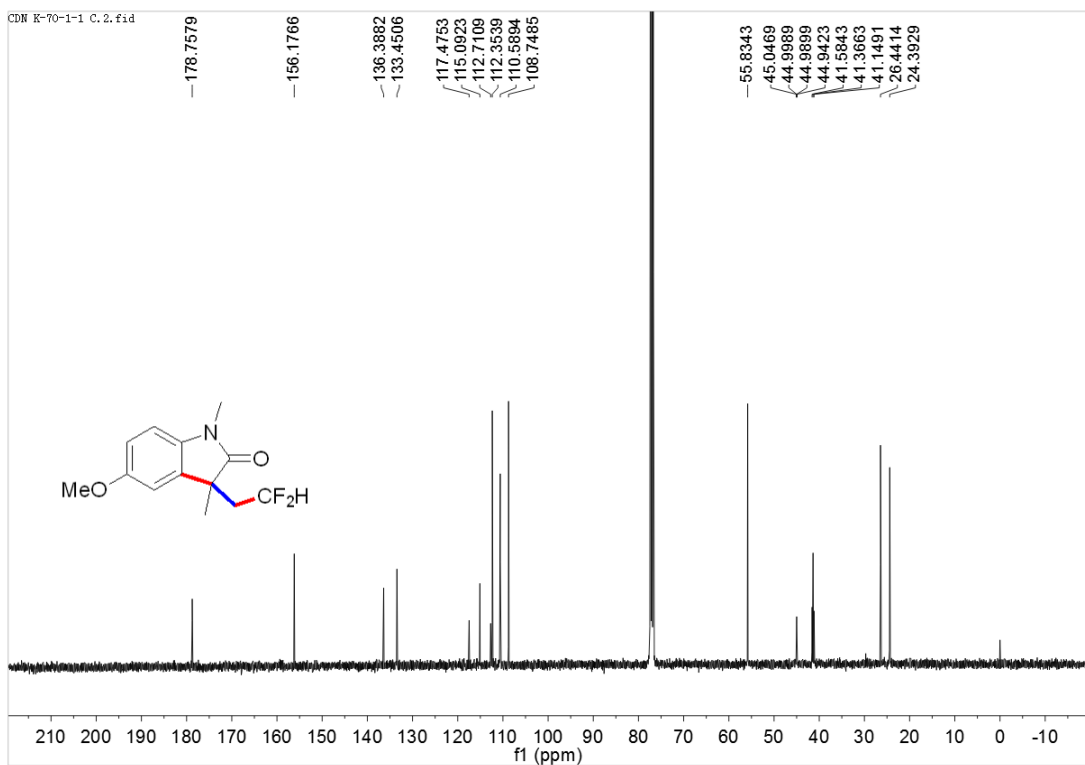

### DEPT 90 and DEPT 135

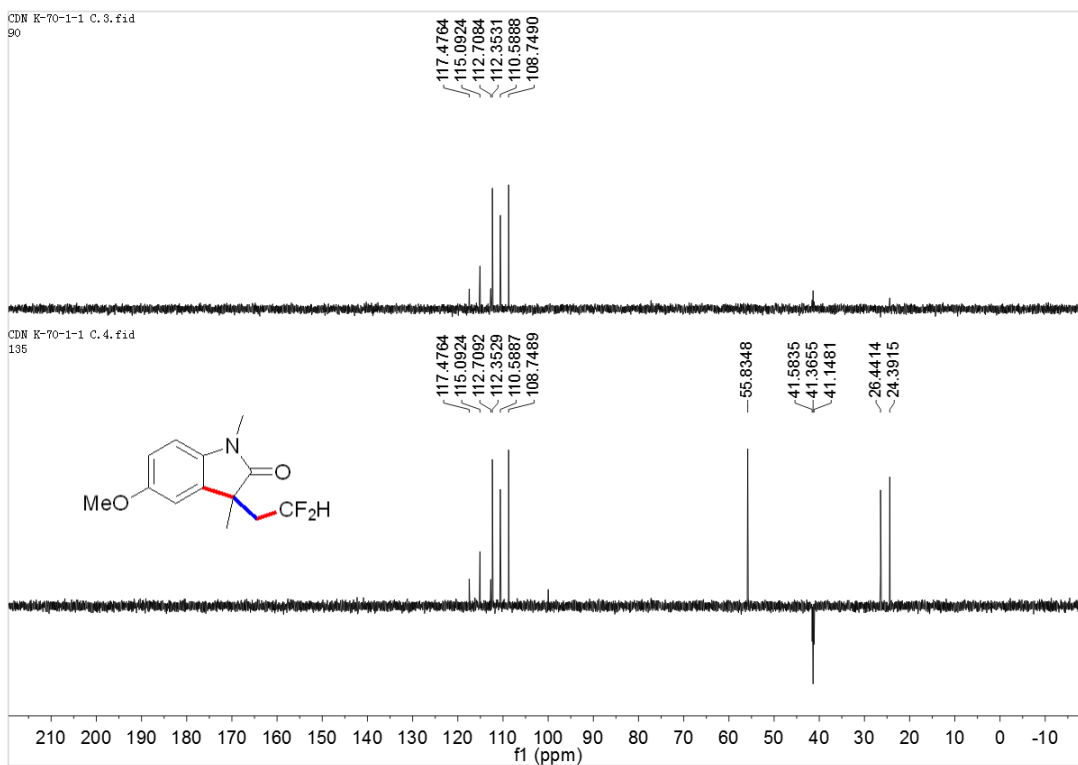

### <sup>19</sup>F NMR

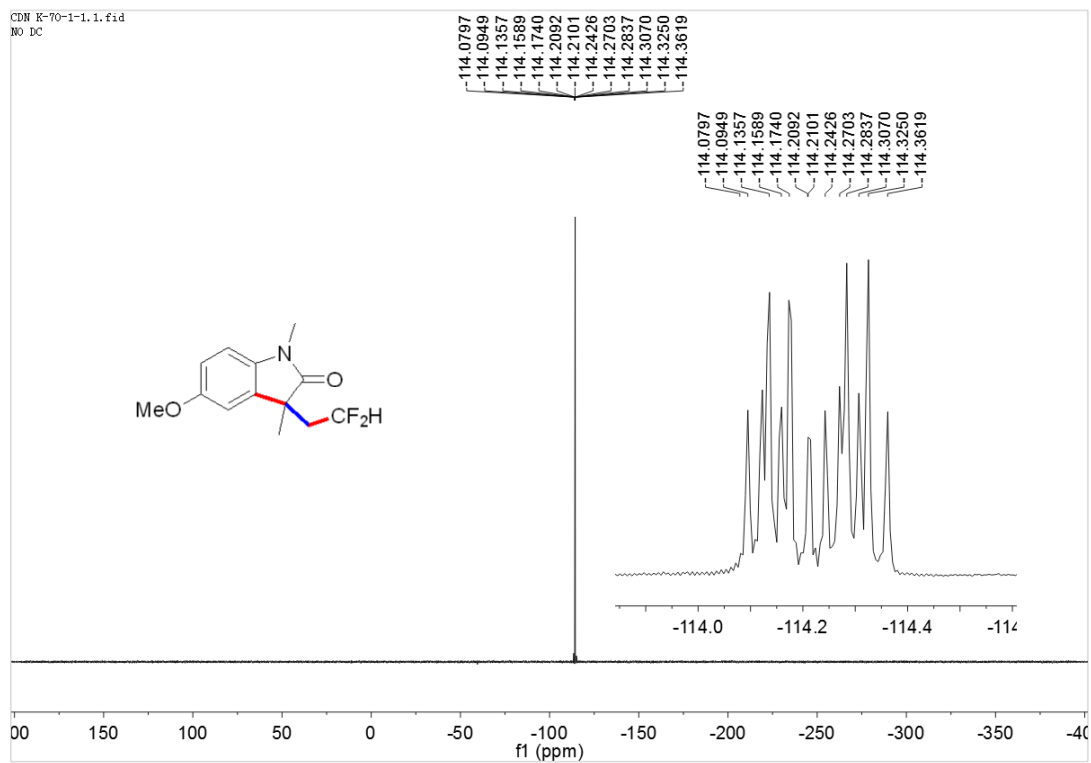

### 5d1, <sup>1</sup>H NMR

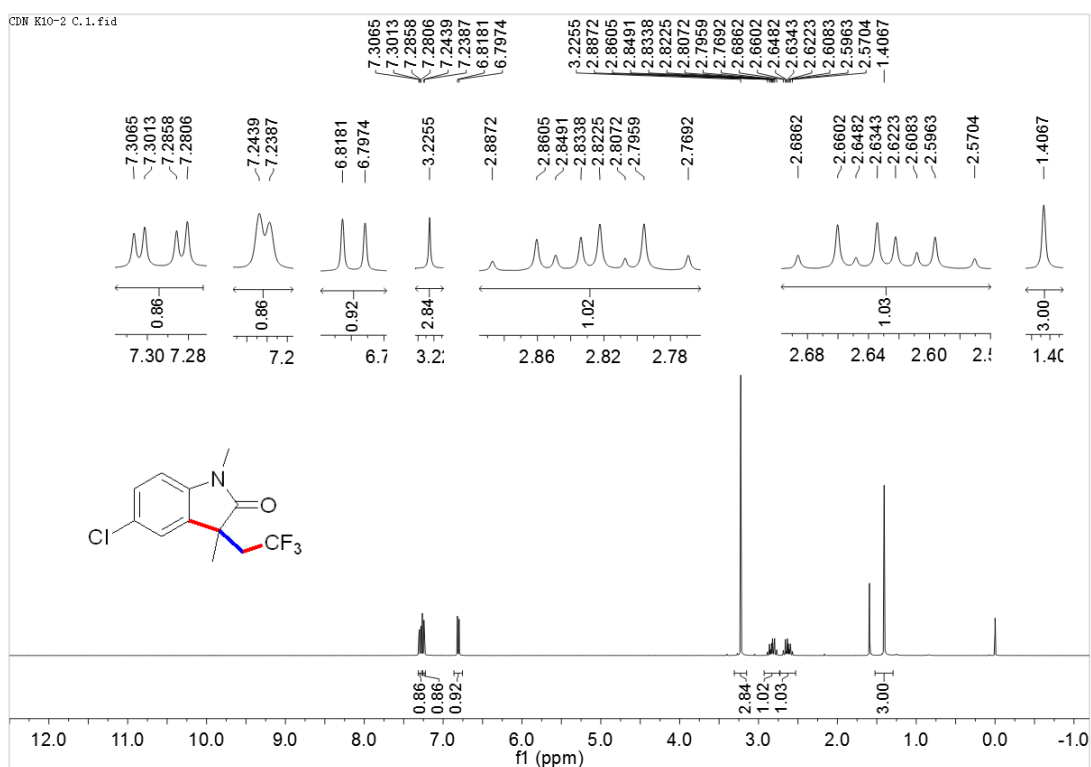

### <sup>13</sup>C NMR

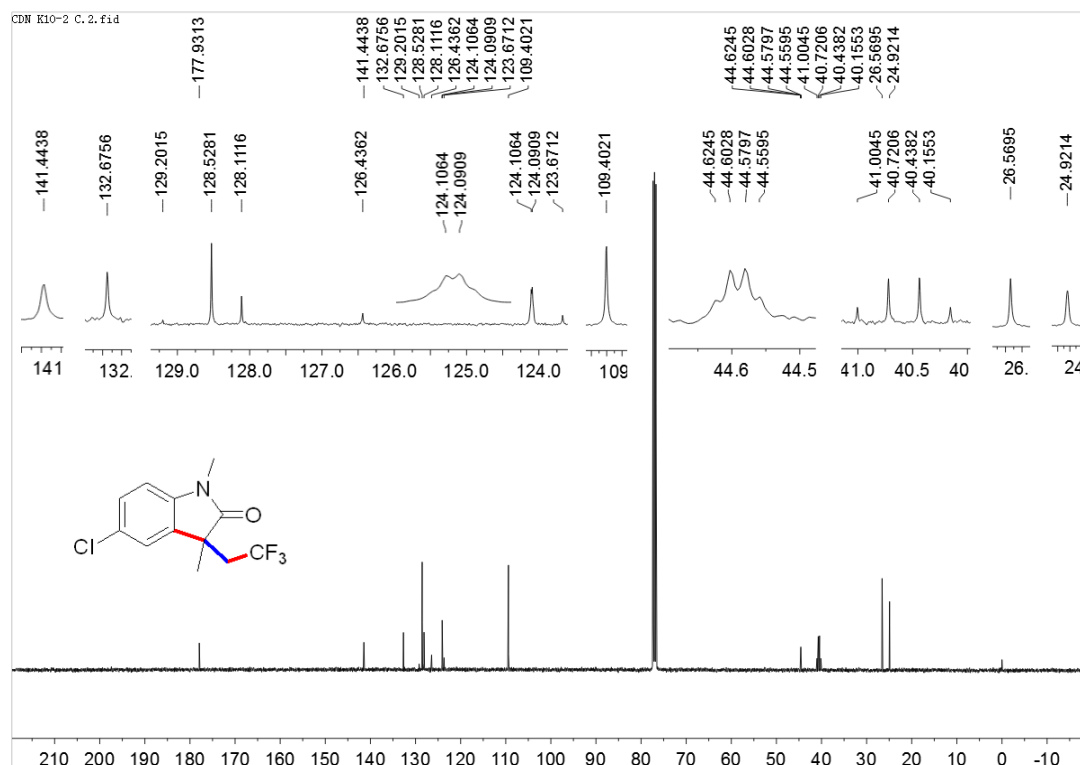

## DEPT 90 and DEPT 135

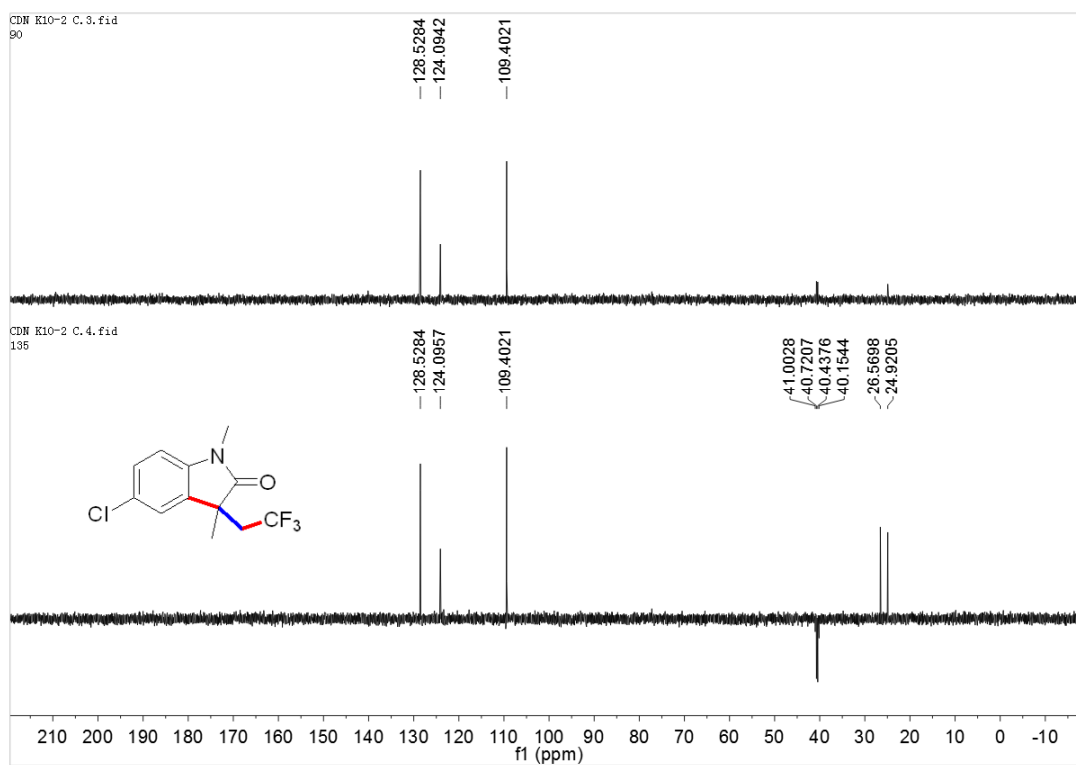

## <sup>19</sup>F NMR

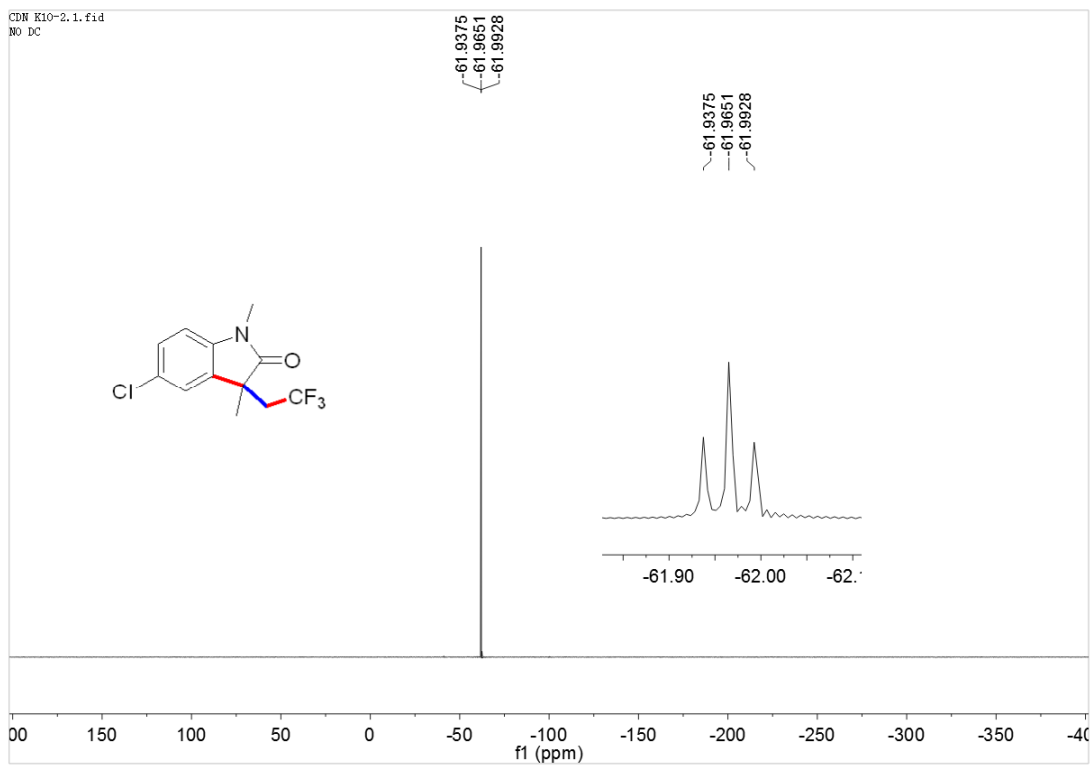

### 5d2, <sup>1</sup>H NMR

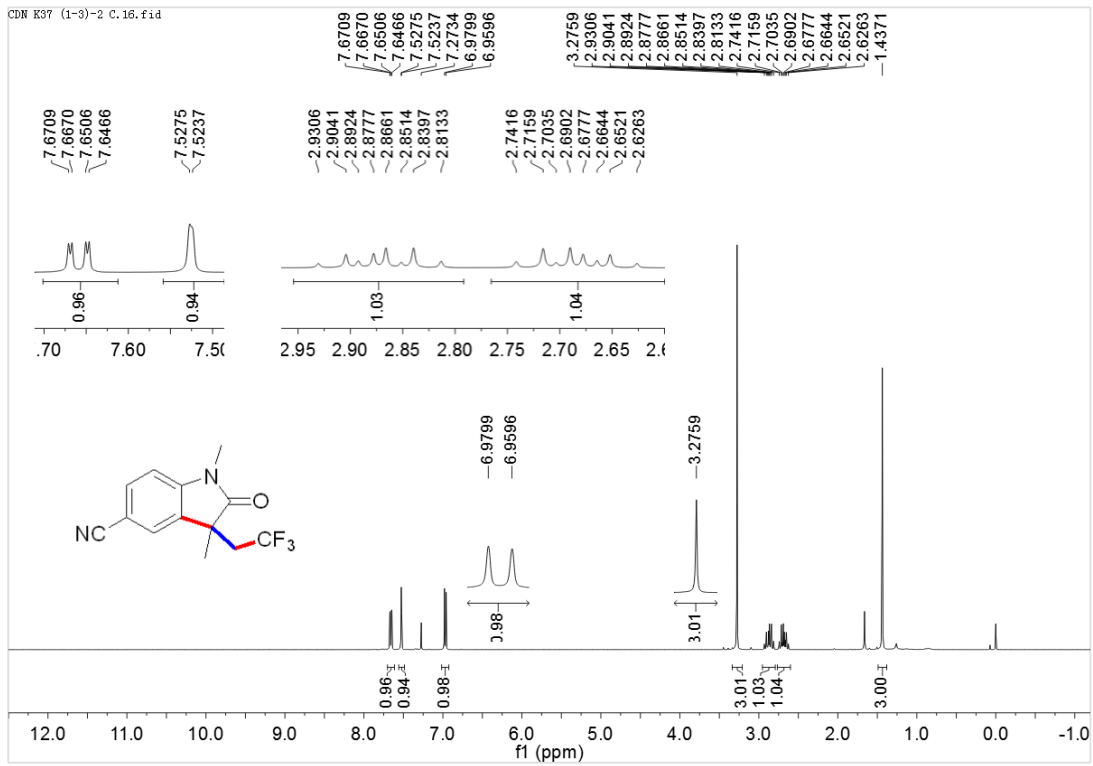

### <sup>13</sup>C NMR

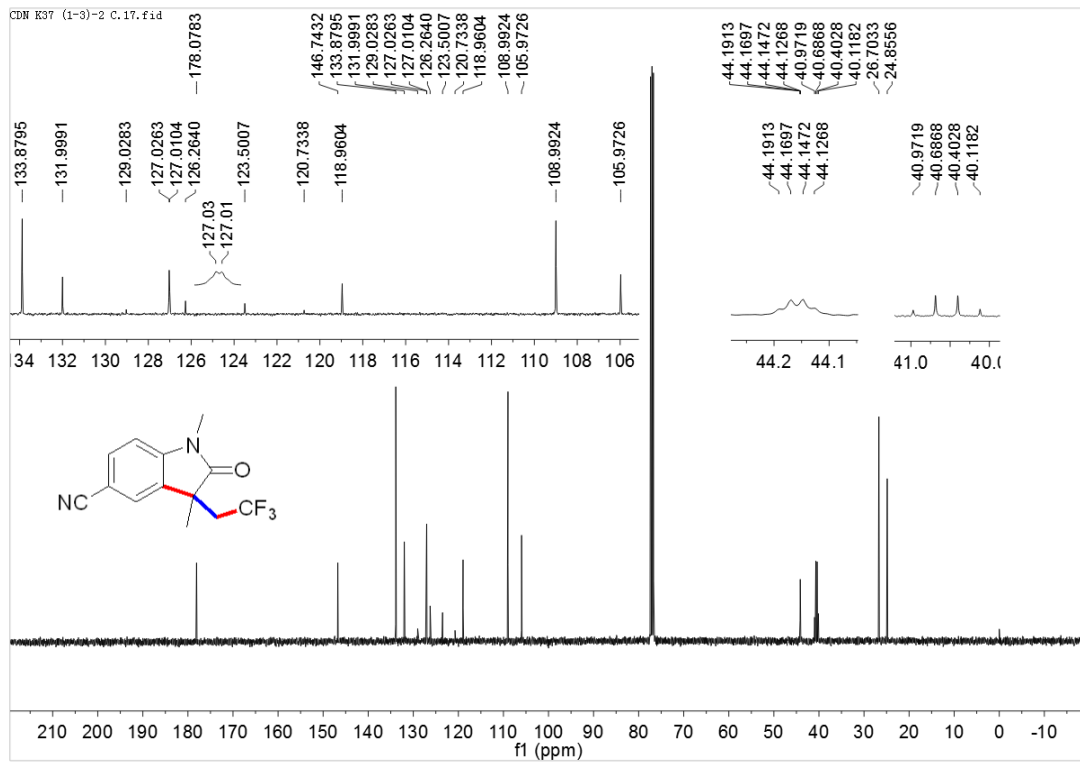



### DEPT 90 and DEPT 135

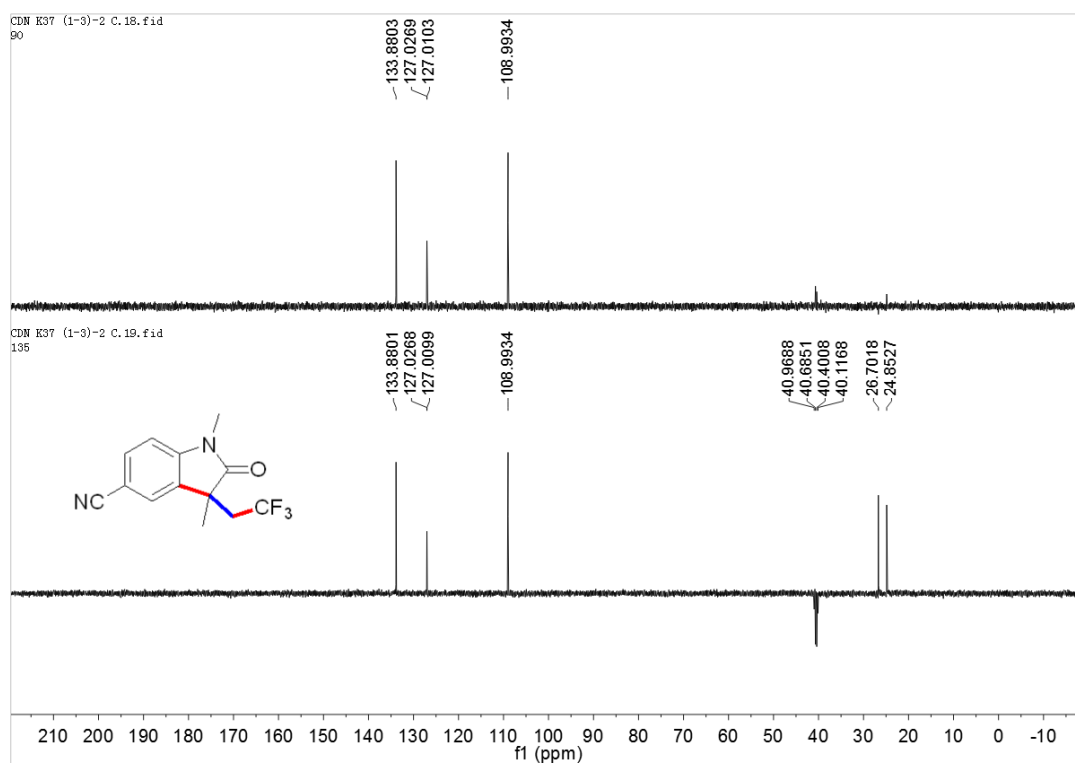

### <sup>19</sup>F NMR

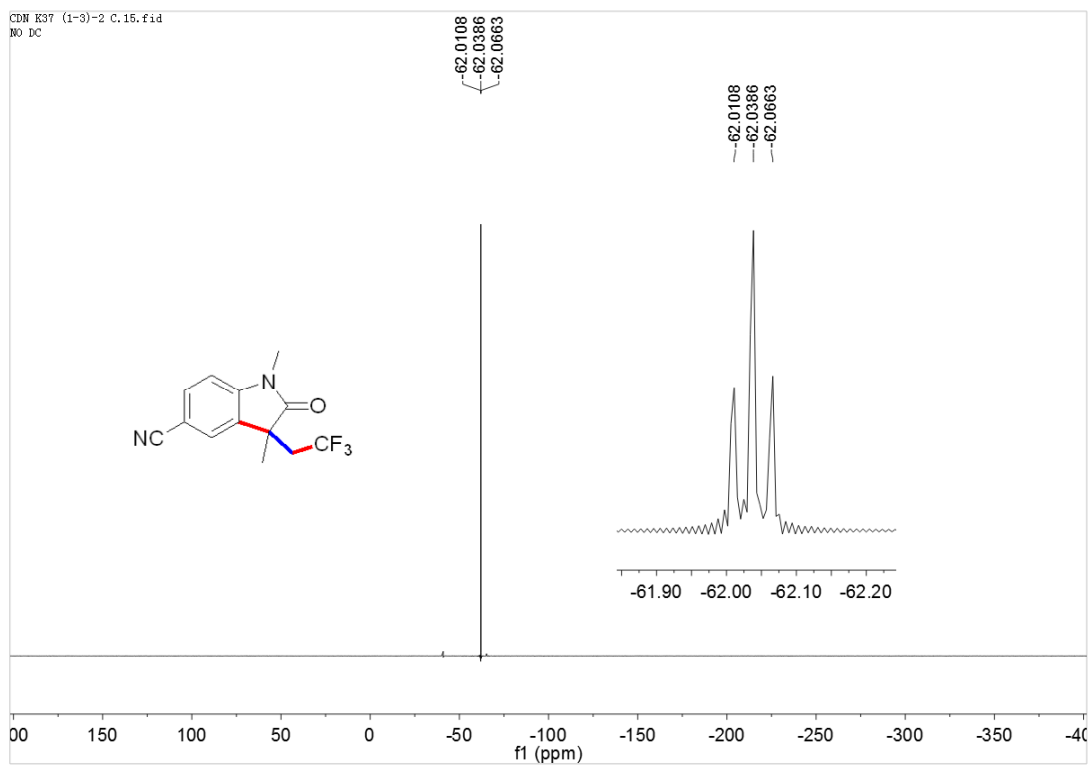

5e, <sup>1</sup>H NMR

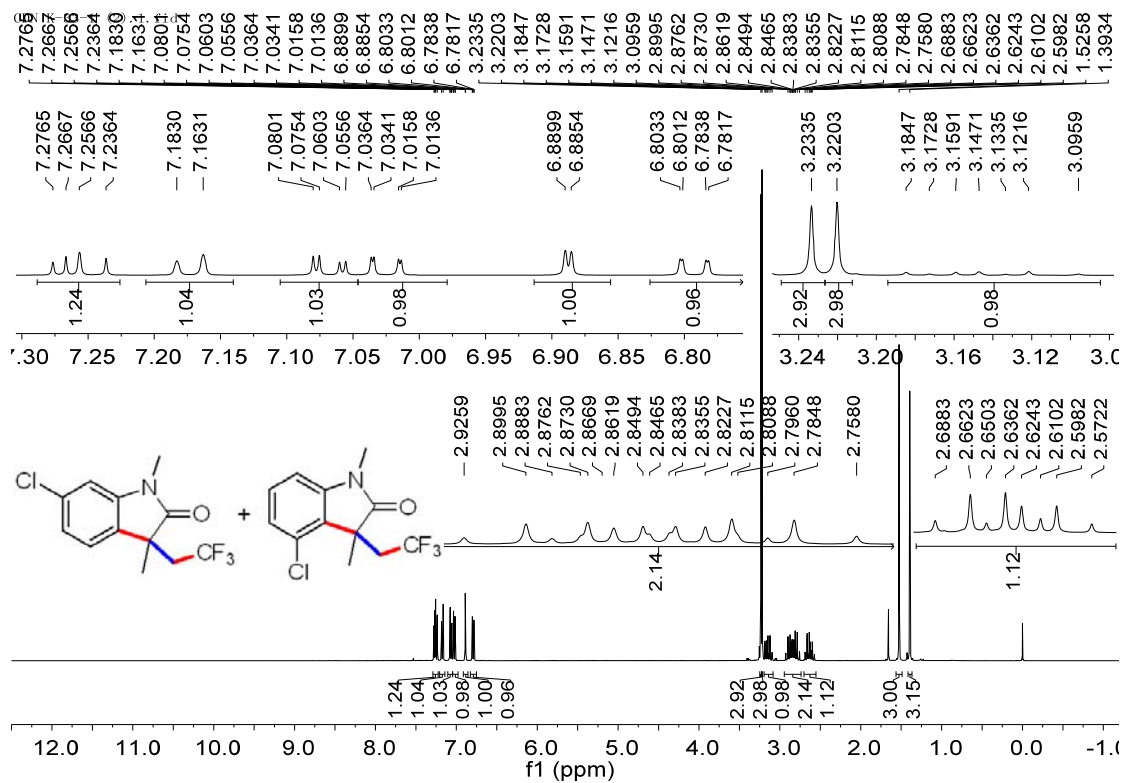

<sup>13</sup>C NMR

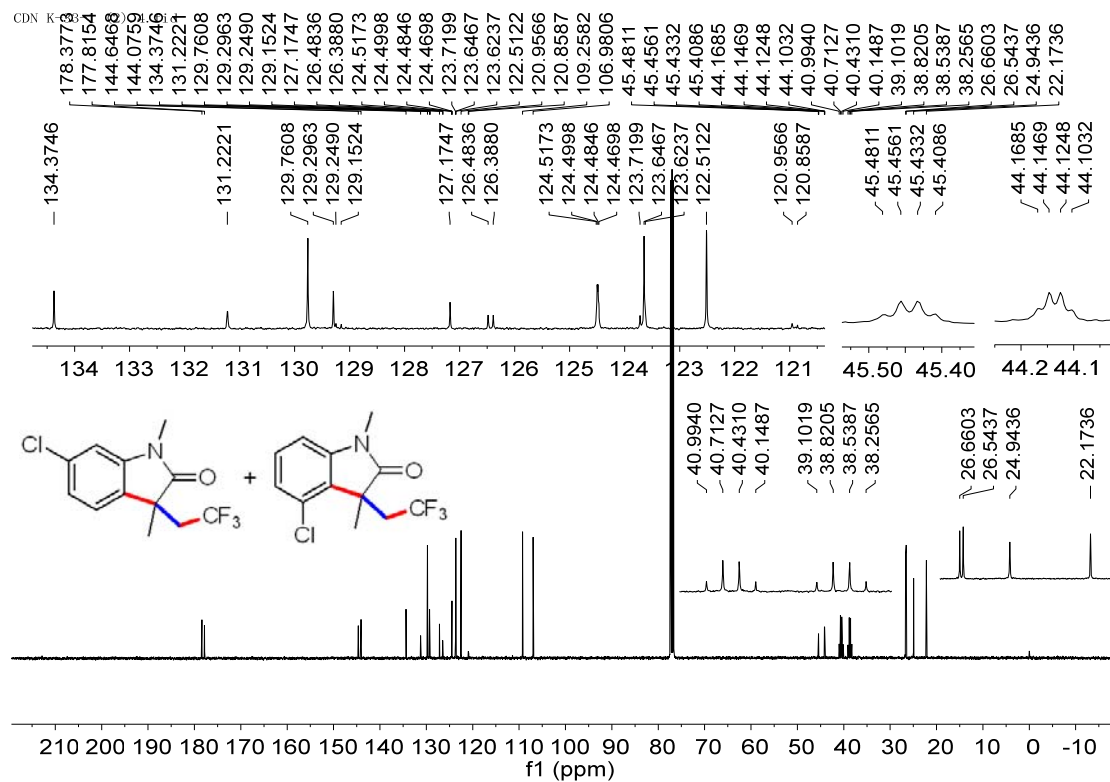

### DEPT 90 and DEPT 135

CDN K-33-1 (2).5.fid  
90

129.7612  
124.5008  
124.4826  
123.6470  
122.5116  
109.2579  
106.9815

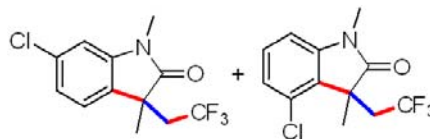

CDN K-33-1 (2).6.fid  
135

129.7612  
124.5008  
124.4832  
123.6470  
122.5116  
109.2580  
106.9814

40.9941  
40.7120  
40.4301  
40.1488  
39.1018  
38.8194  
38.5381  
38.2567  
26.6607  
26.5441  
24.9425  
22.1738

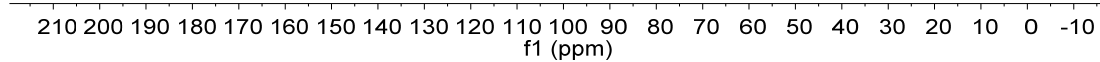

### <sup>19</sup>F NMR

CDN K-33-1 (2).2.fid  
F, NO DC

-61.9320  
-61.9602  
-61.9878  
-63.9677  
-63.9960  
-64.0232

-63.9677  
-63.9960  
-64.0232

-61.9320  
-61.9602  
-61.9878

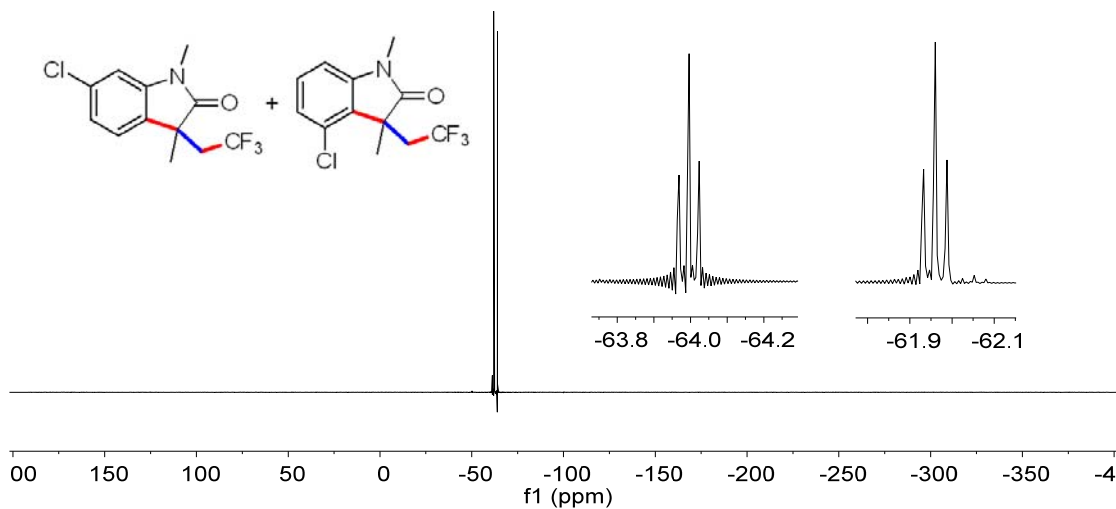

7a, <sup>1</sup>H NMR

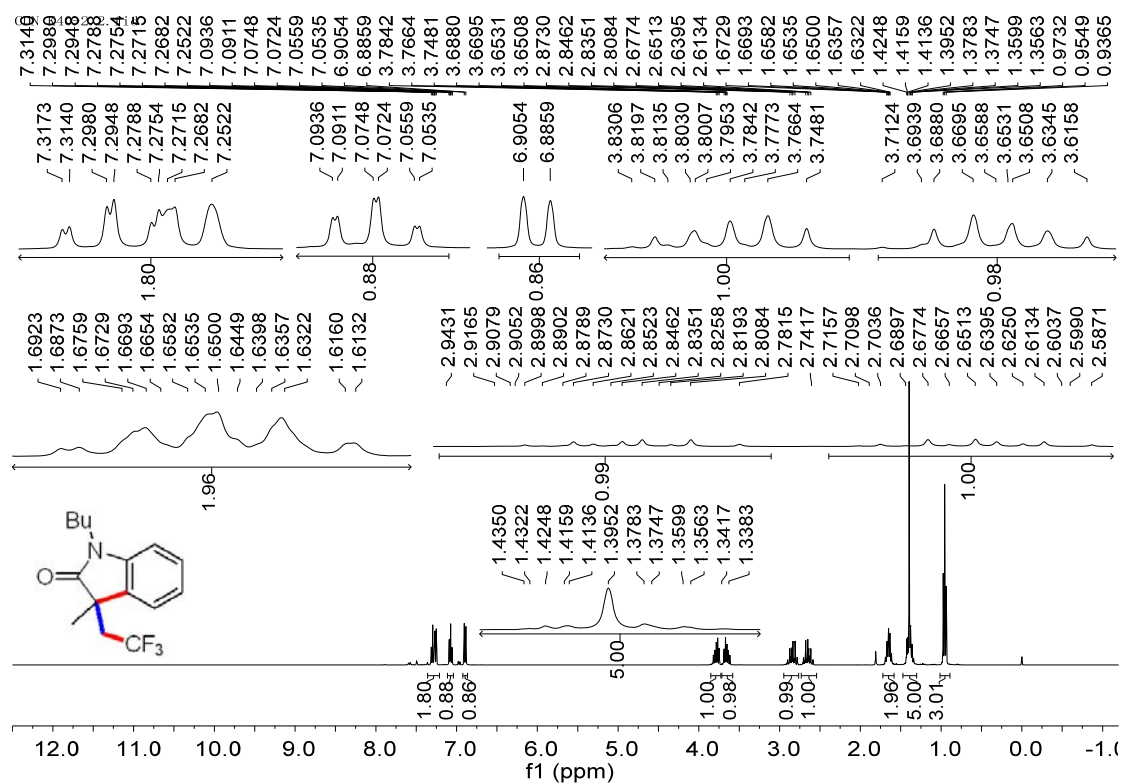

<sup>13</sup>C NMR

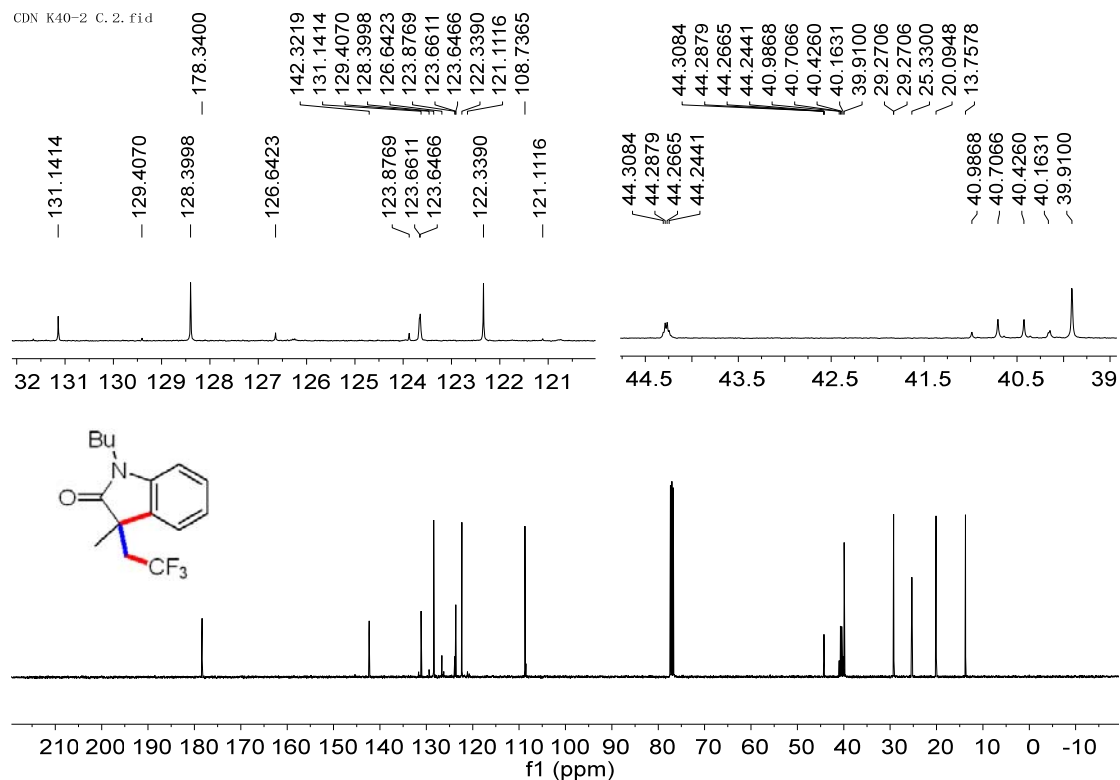

DEPT 90 and DEPT 135

CDN K40-2 C. 3. fid  
90

128.4011  
123.6624  
123.6475  
122.3405  
— 108.7384

CDN K40-2 C. 4. fid  
135

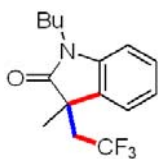

128.4012  
123.6635  
123.6479  
122.3416  
— 108.7387

40.9842  
40.7041  
40.4238  
40.1441  
39.9099  
29.2705  
25.3333  
20.0960  
13.7611

210 200 190 180 170 160 150 140 130 120 110 100 90 80 70 60 50 40 30 20 10 0 -10  
f1 (ppm)

<sup>19</sup>F NMR

CDN K40-2. 1. fid  
F, NO DC

-61.8577  
-61.8860  
-61.9140

-61.8577  
-61.8860  
-61.9140

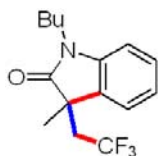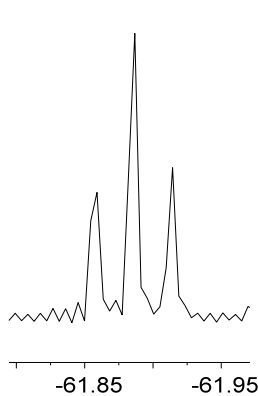

00 150 100 50 0 -50 -100 -150 -200 -250 -300 -350 -4  
f1 (ppm)

### 7b, <sup>1</sup>H NMR

CDN K 7-2.2. f1d

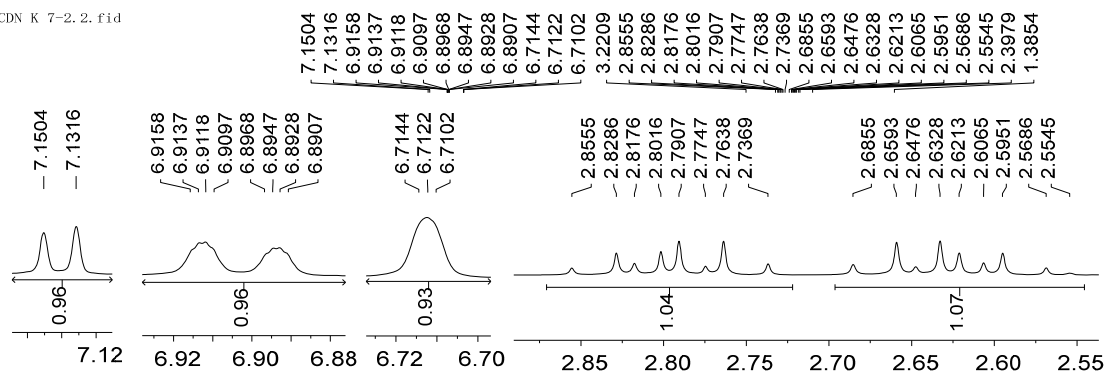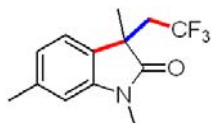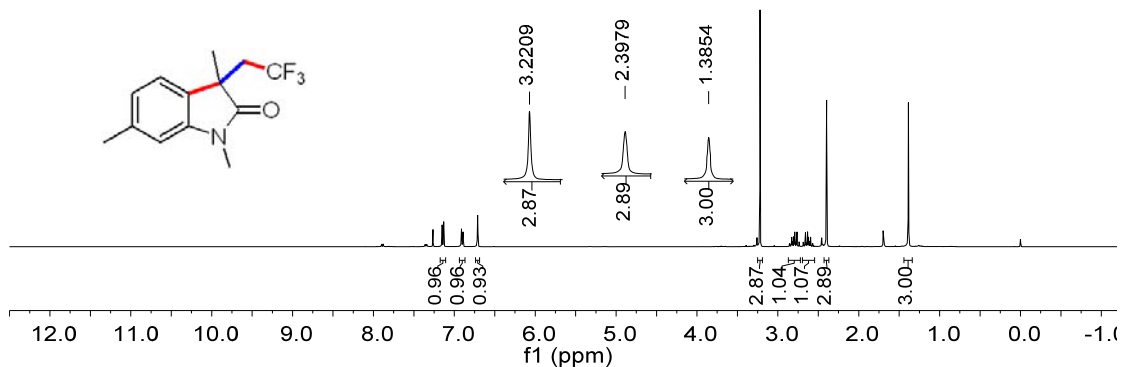

### <sup>13</sup>C NMR

CDN K 7-2. C.2. f1d

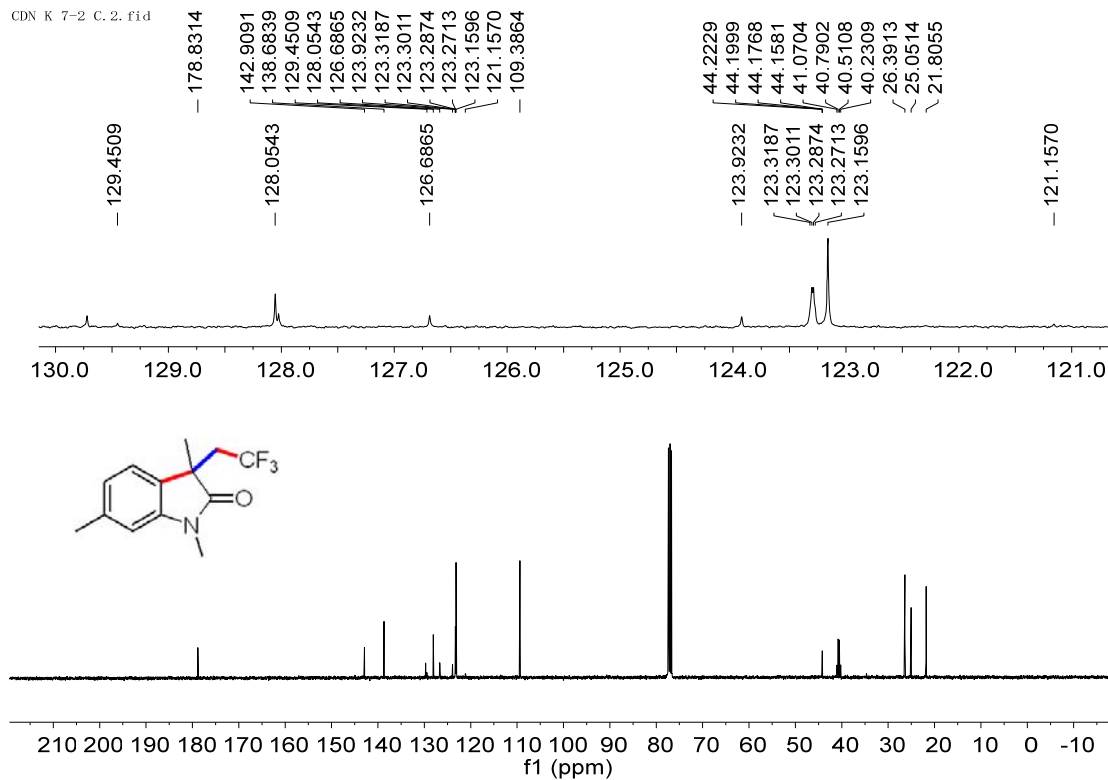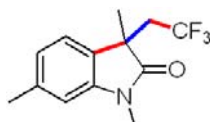

### DEPT 90 and DEPT 135

CDN K 7-2 C. 3. fid  
90

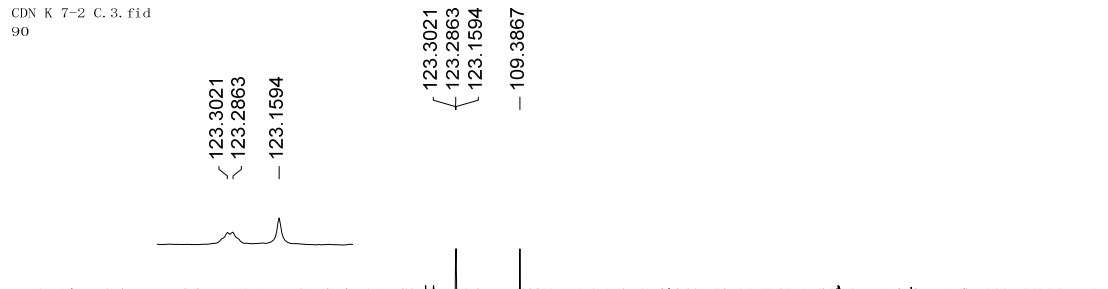

CDN K 7-2 C. 4. fid  
135

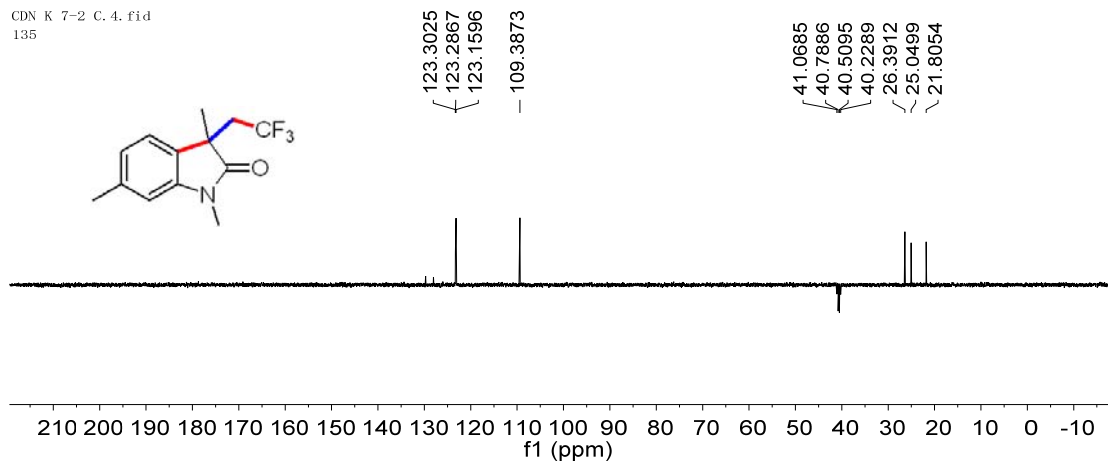

### <sup>19</sup>F NMR

CDN K 7-2.1.fid  
NO DC

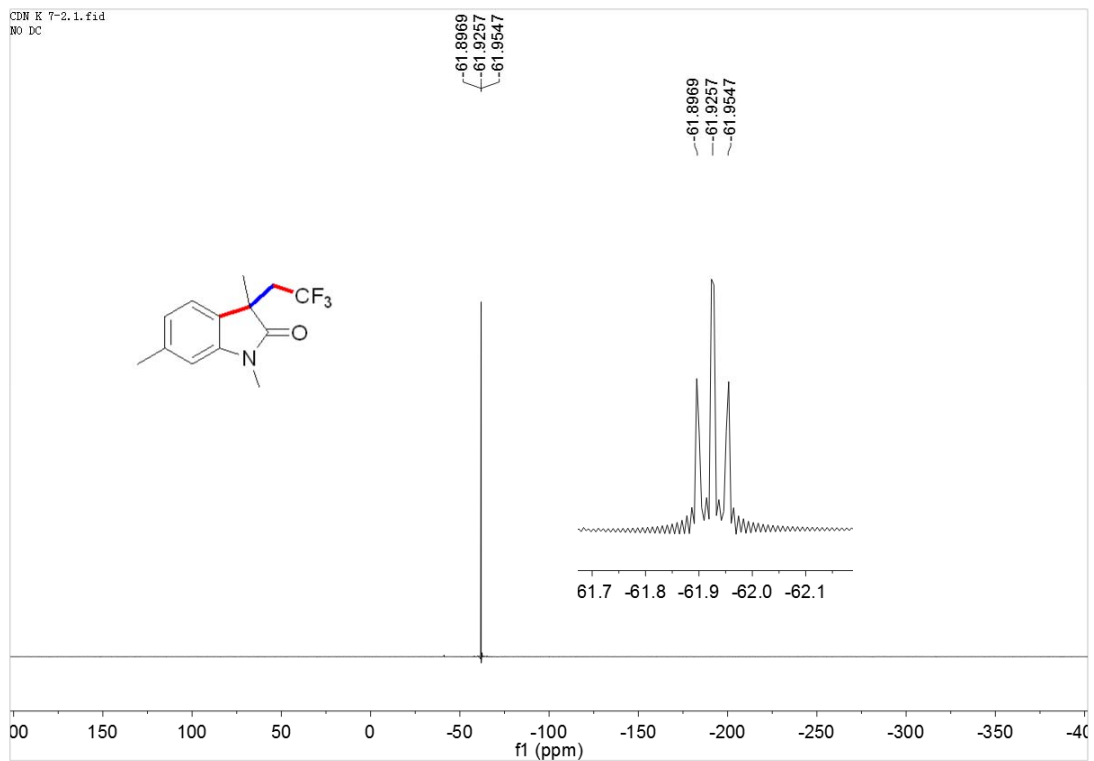

9a, <sup>1</sup>H NMR

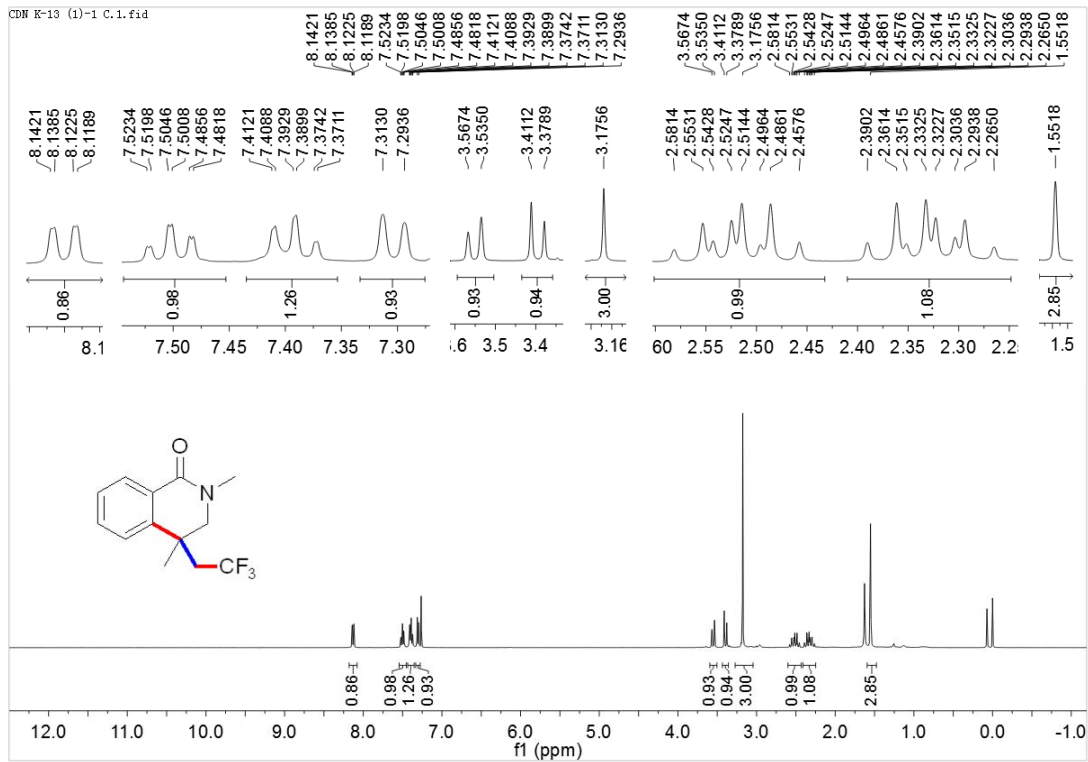

<sup>13</sup>C NMR

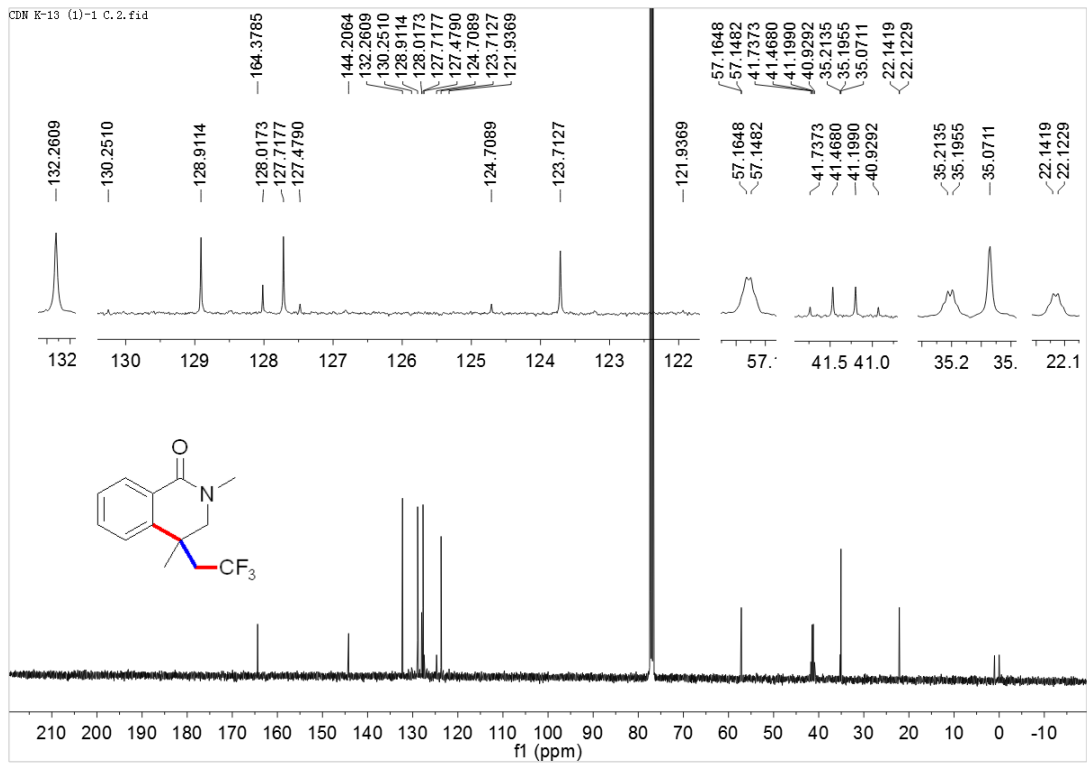



# DEPT 90 and DEPT 135

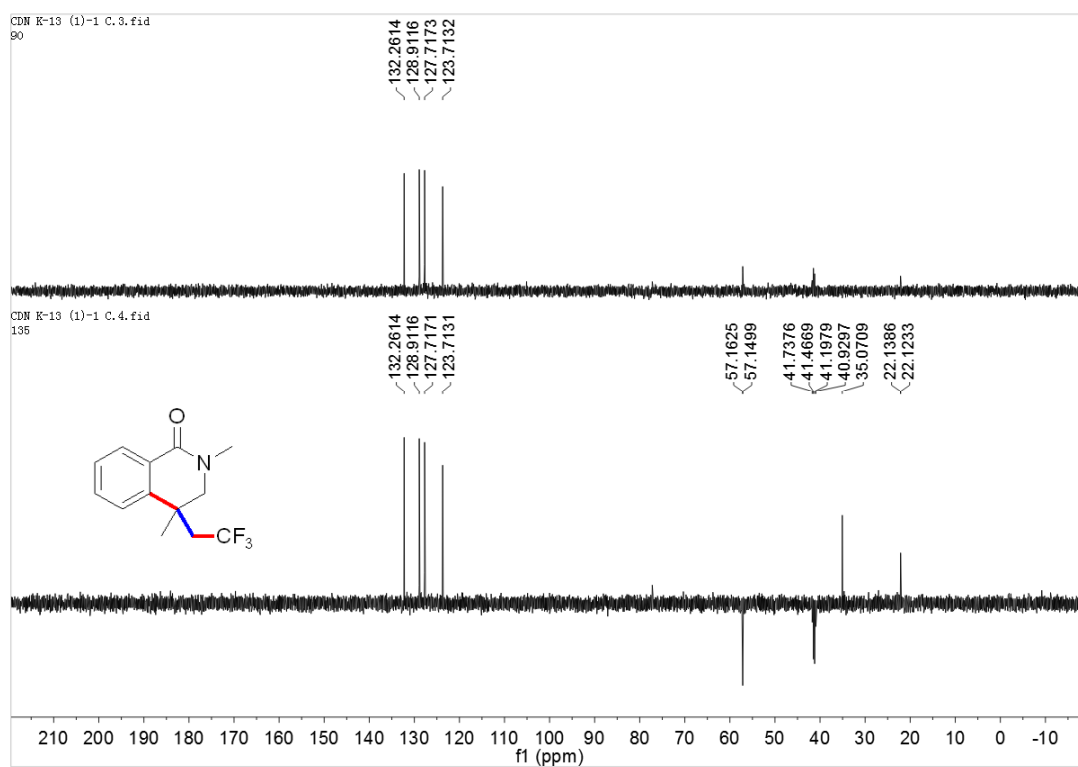

# <sup>19</sup>F NMR

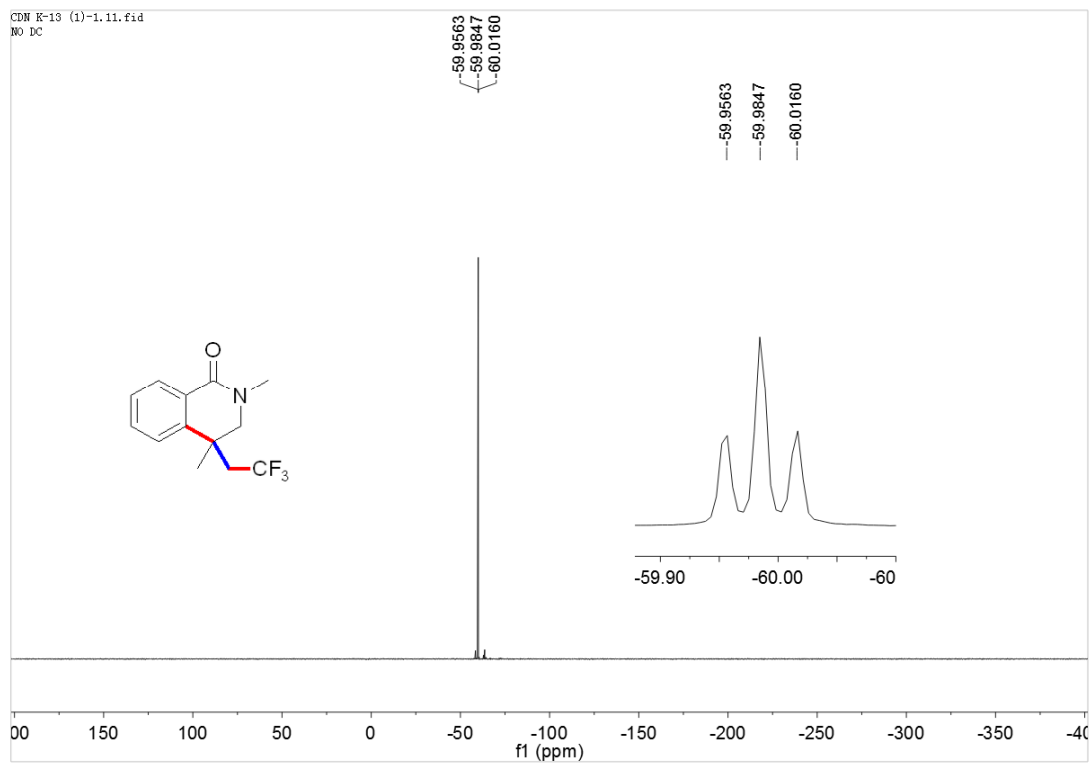

### 9b, <sup>1</sup>H NMR

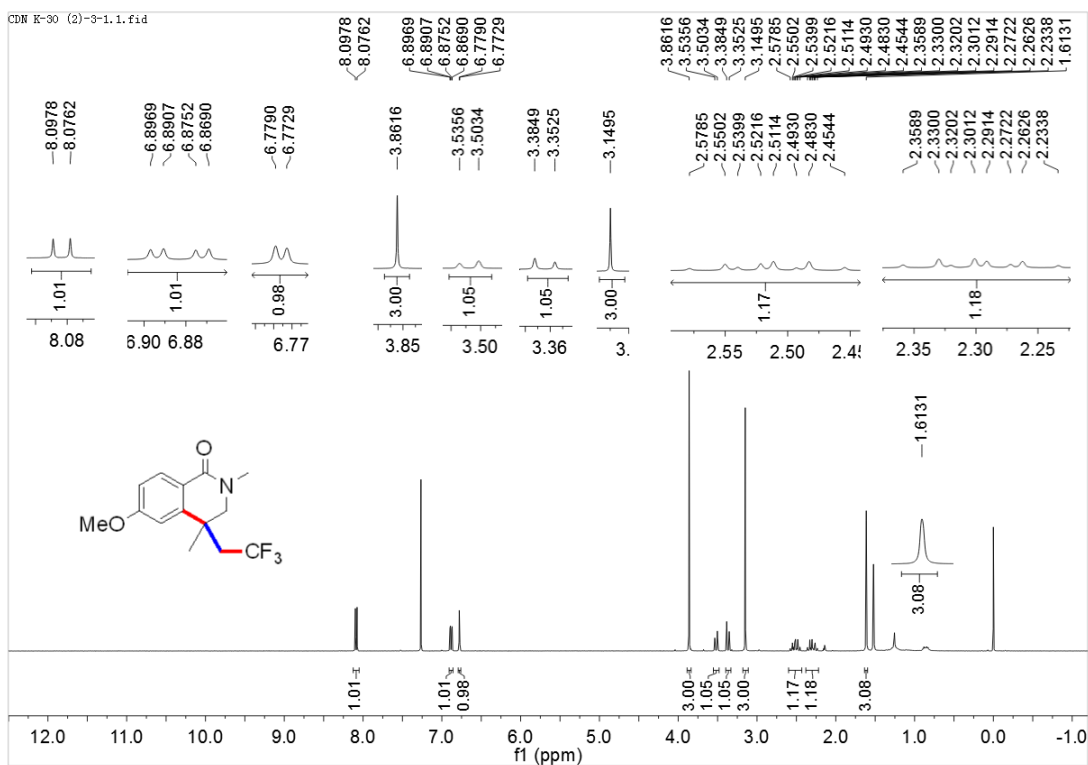

### <sup>13</sup>C NMR

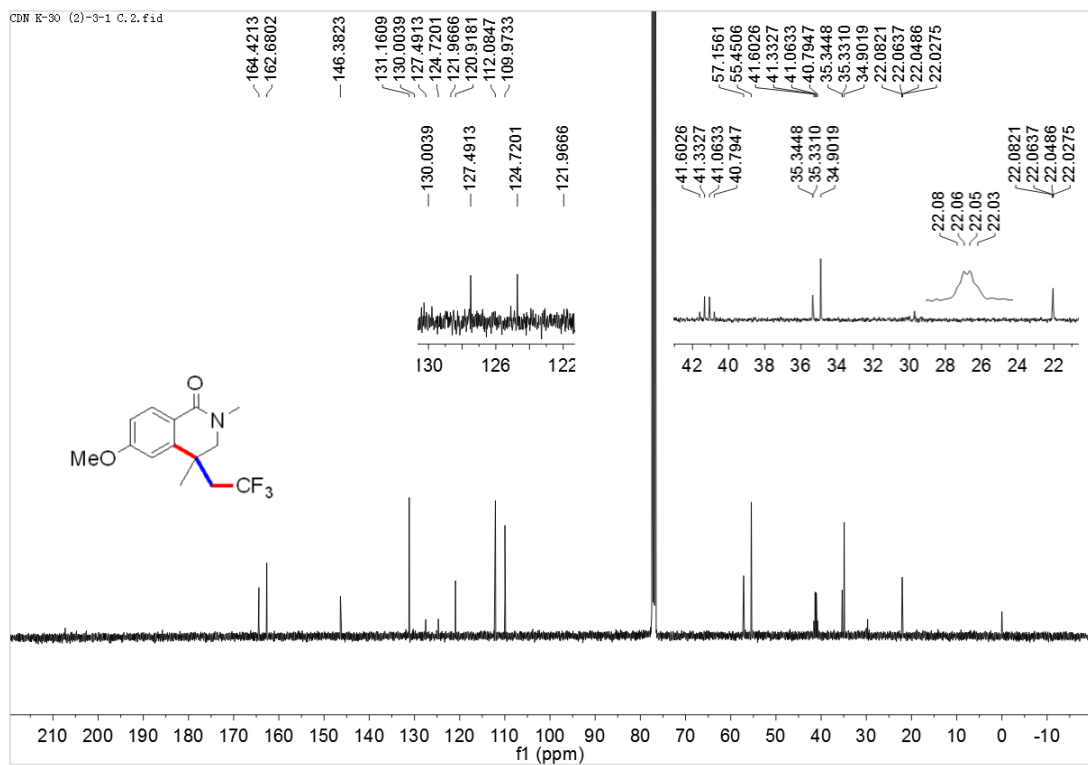

### DEPT 90 and DEPT 135

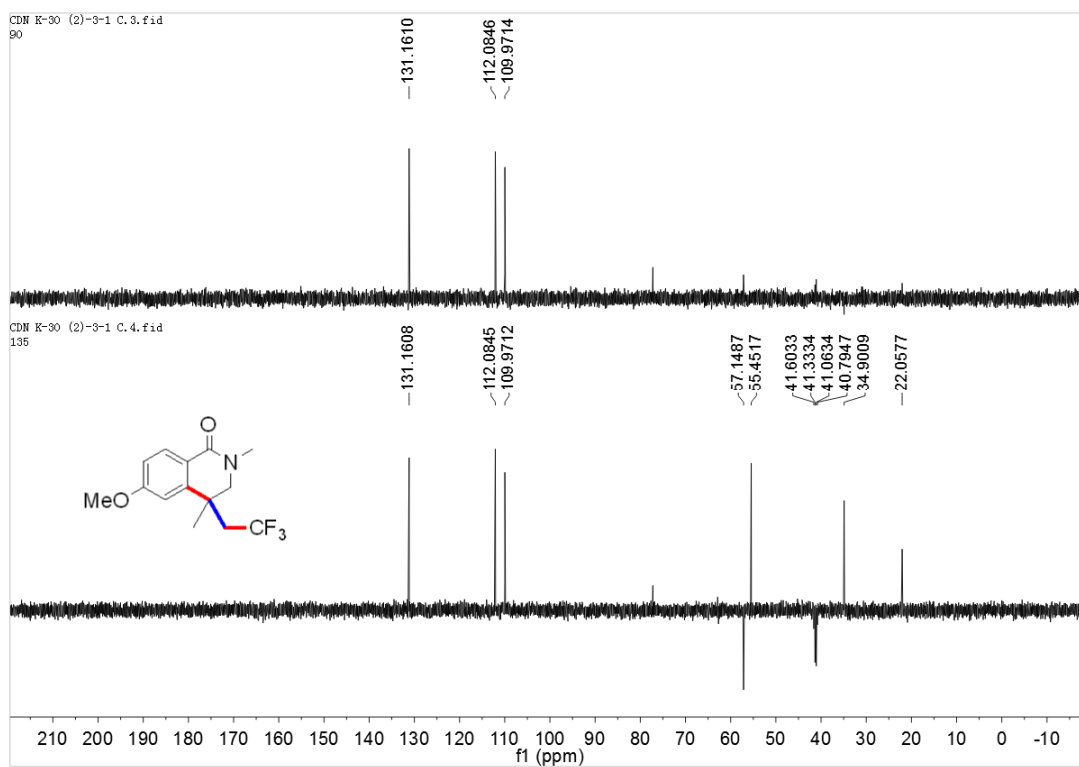

### <sup>19</sup>F NMR

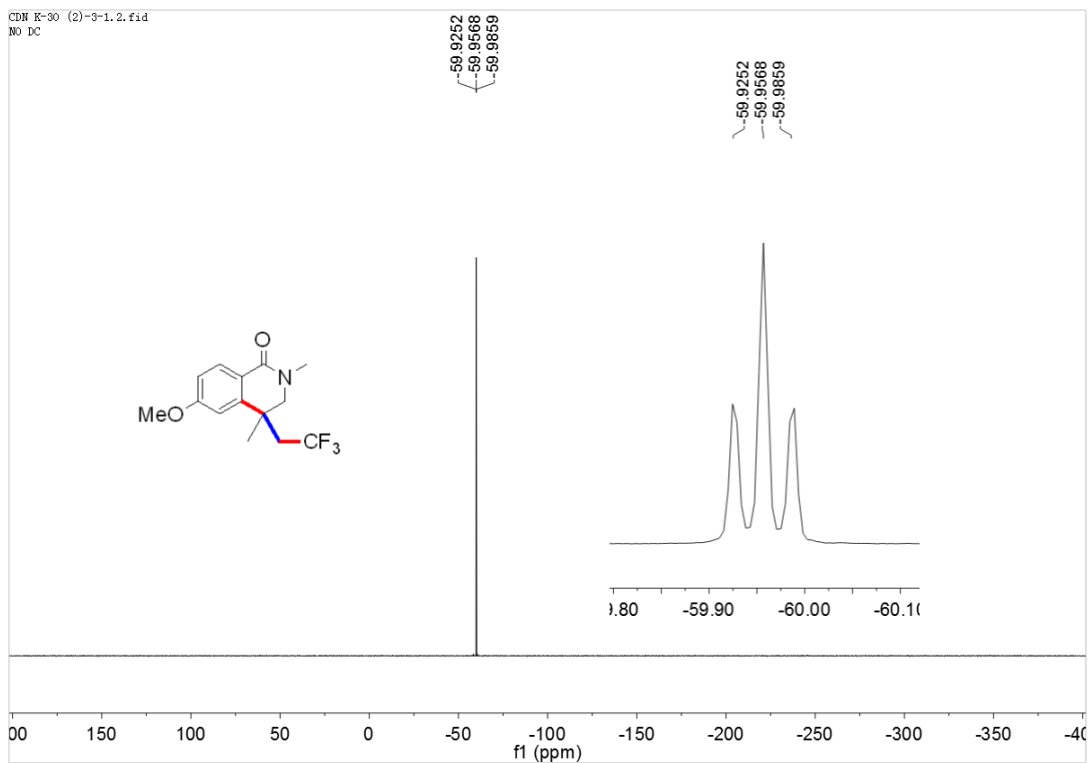

### 9c, <sup>1</sup>H NMR

CDN K-32-3. 2. fid

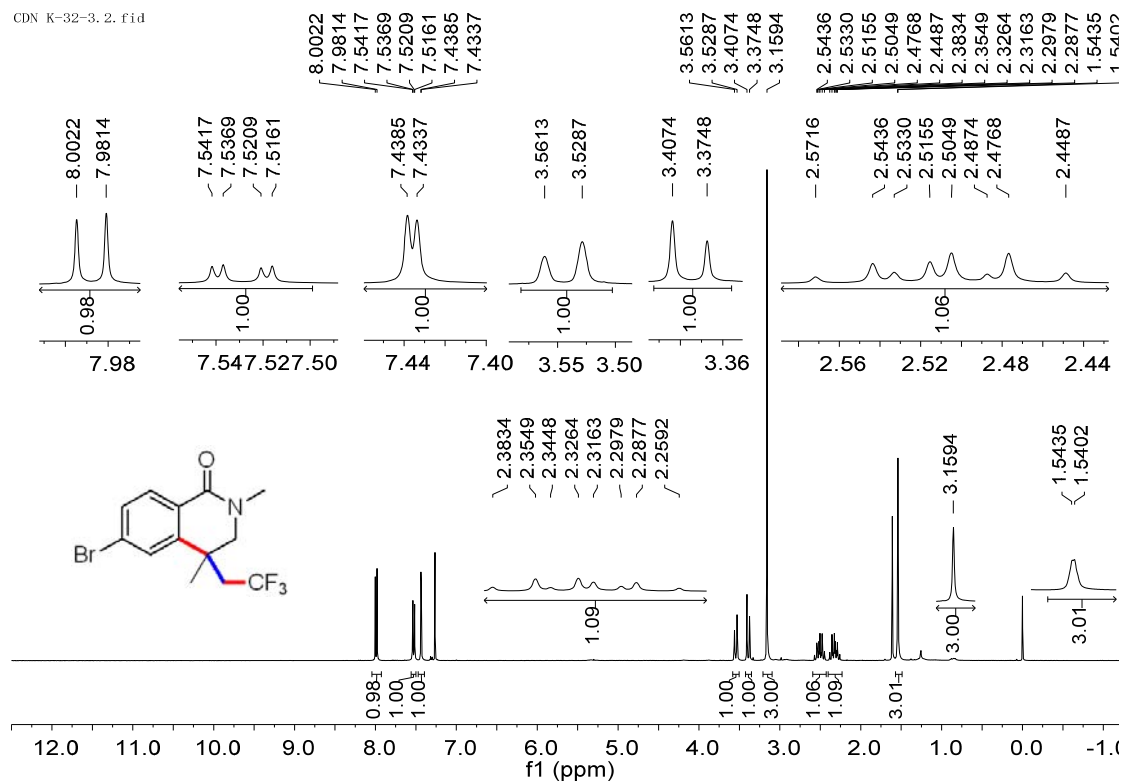

### <sup>13</sup>C NMR

CDN K-32-3 C. 2. fid

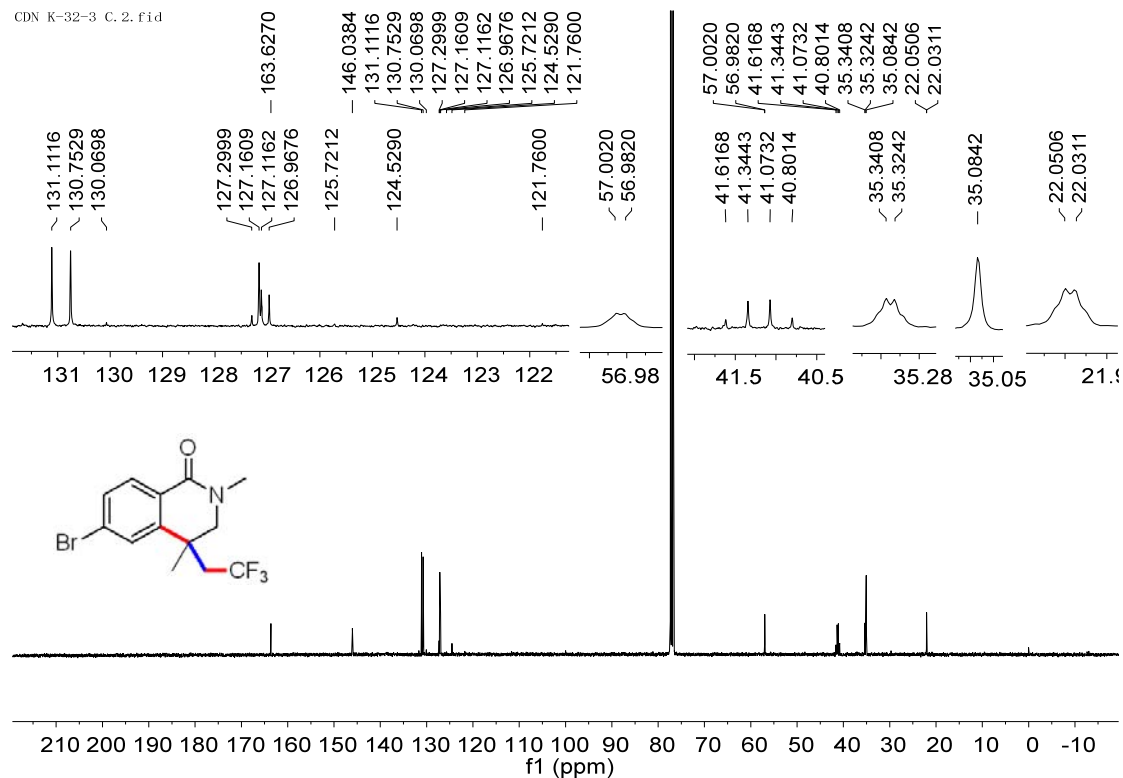

### DEPT 90 and DEPT 135

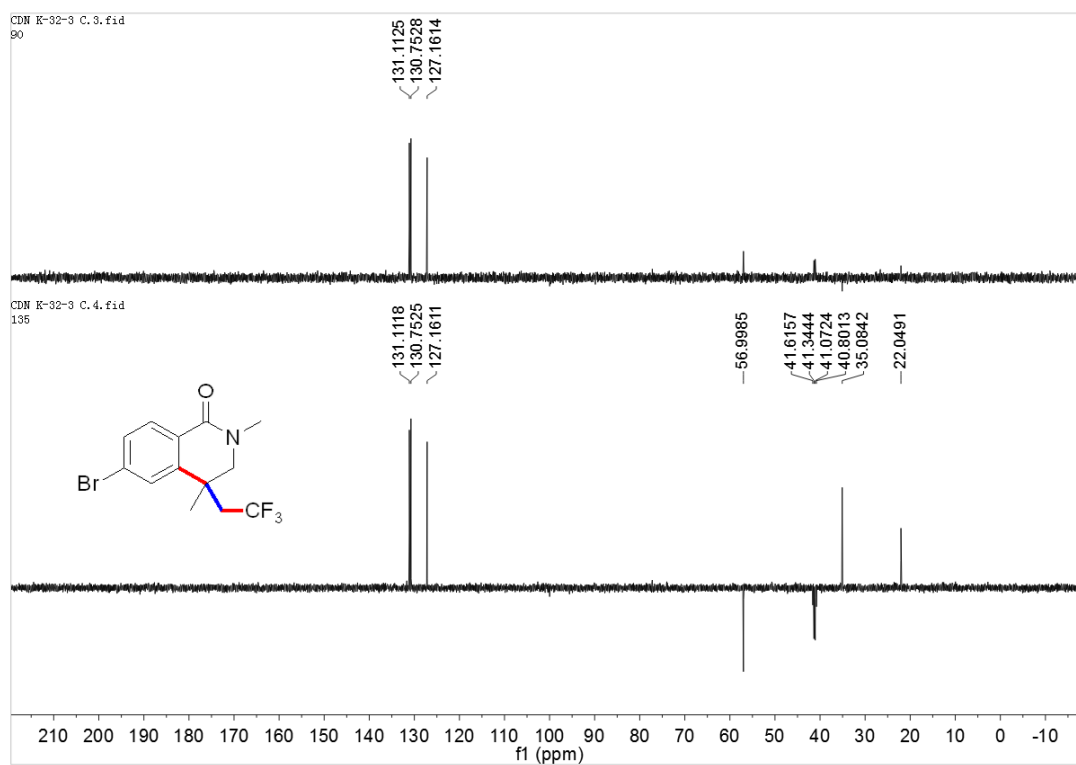

### <sup>19</sup>F NMR

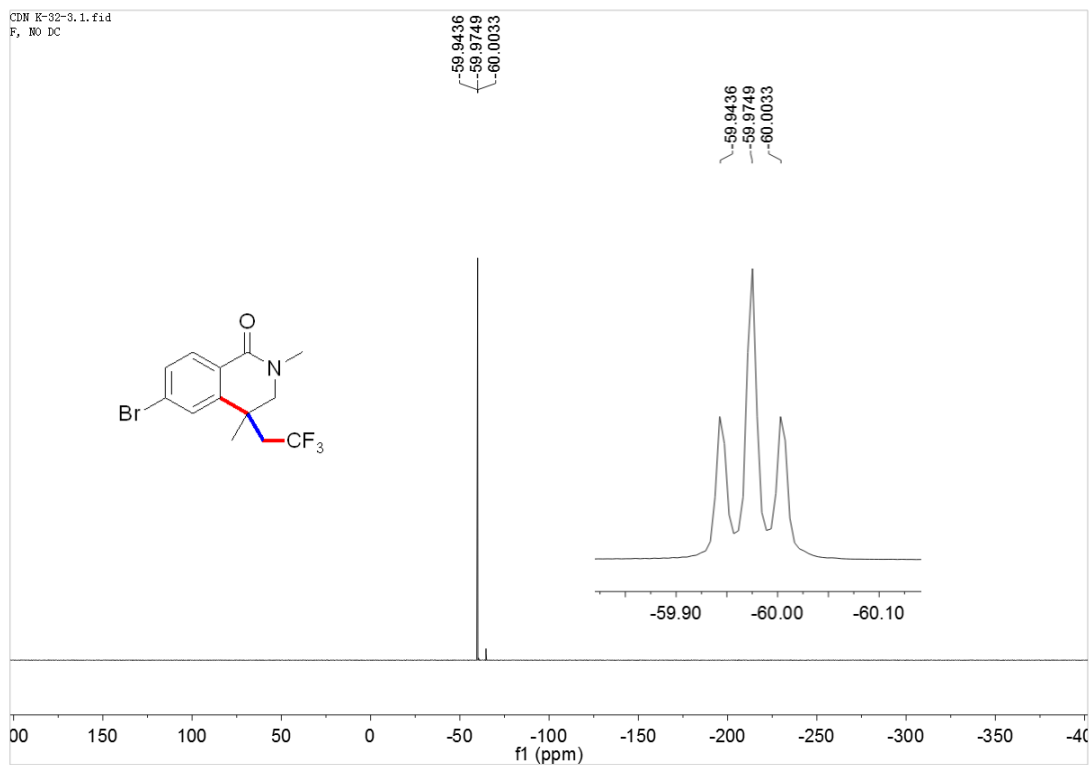

### 9d, <sup>1</sup>H NMR

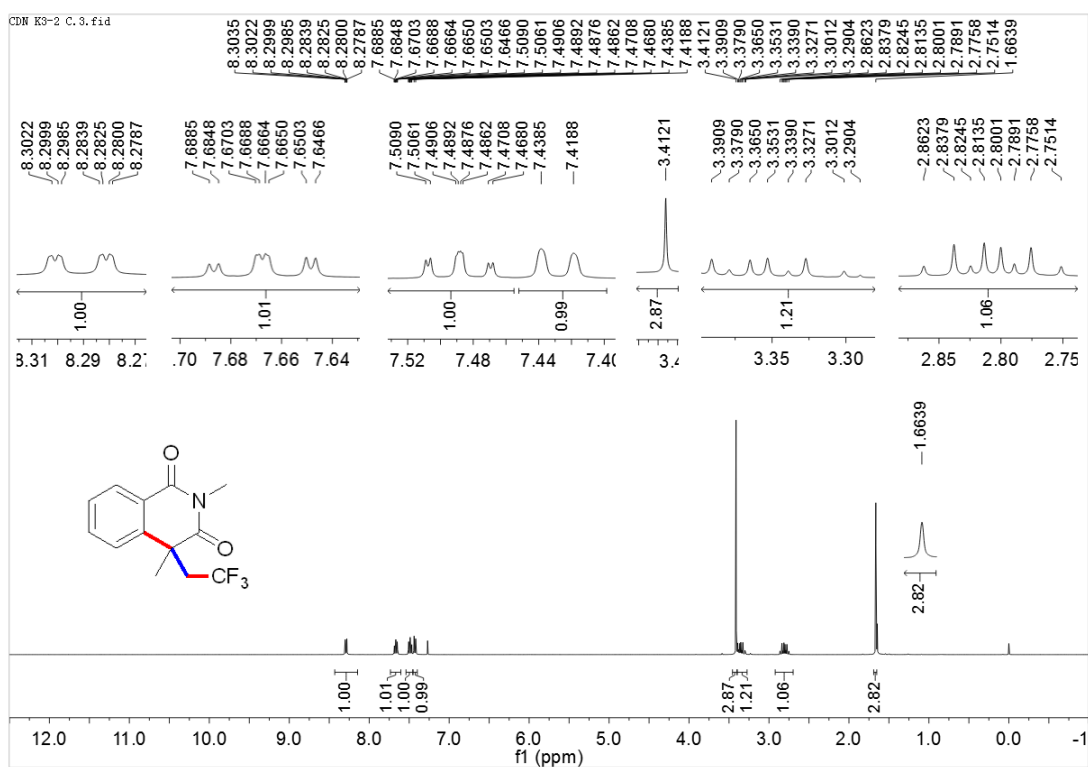

### <sup>13</sup>C NMR

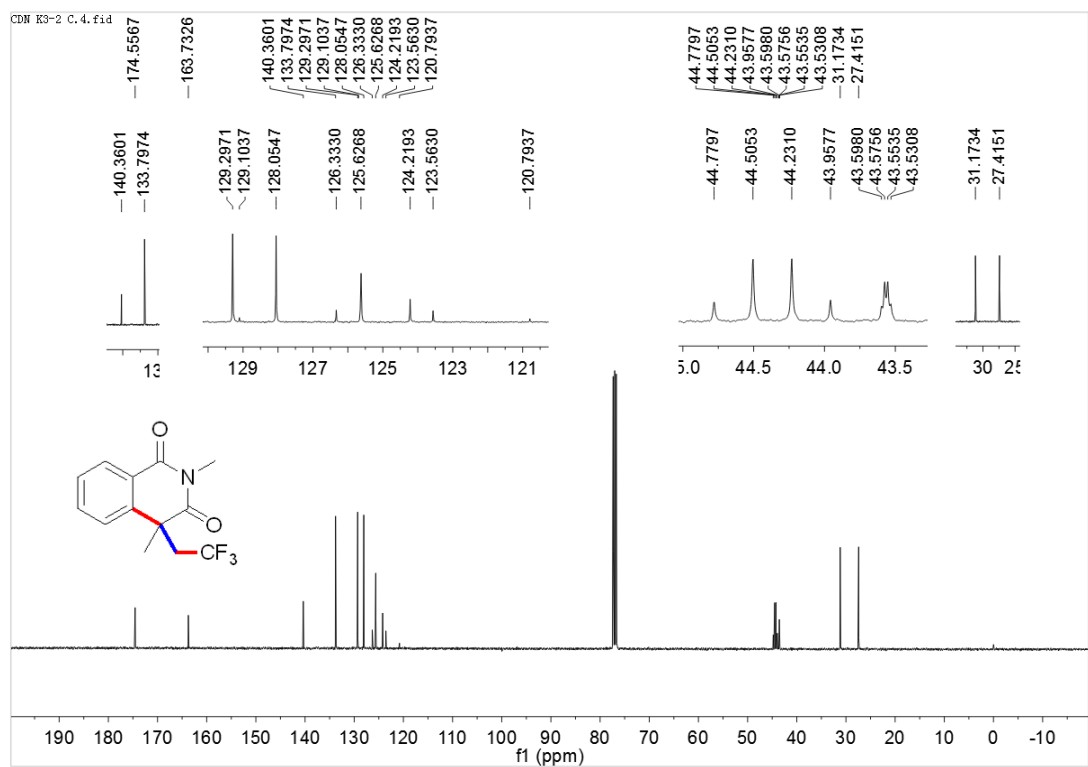

### DEPT 90 and DEPT 135

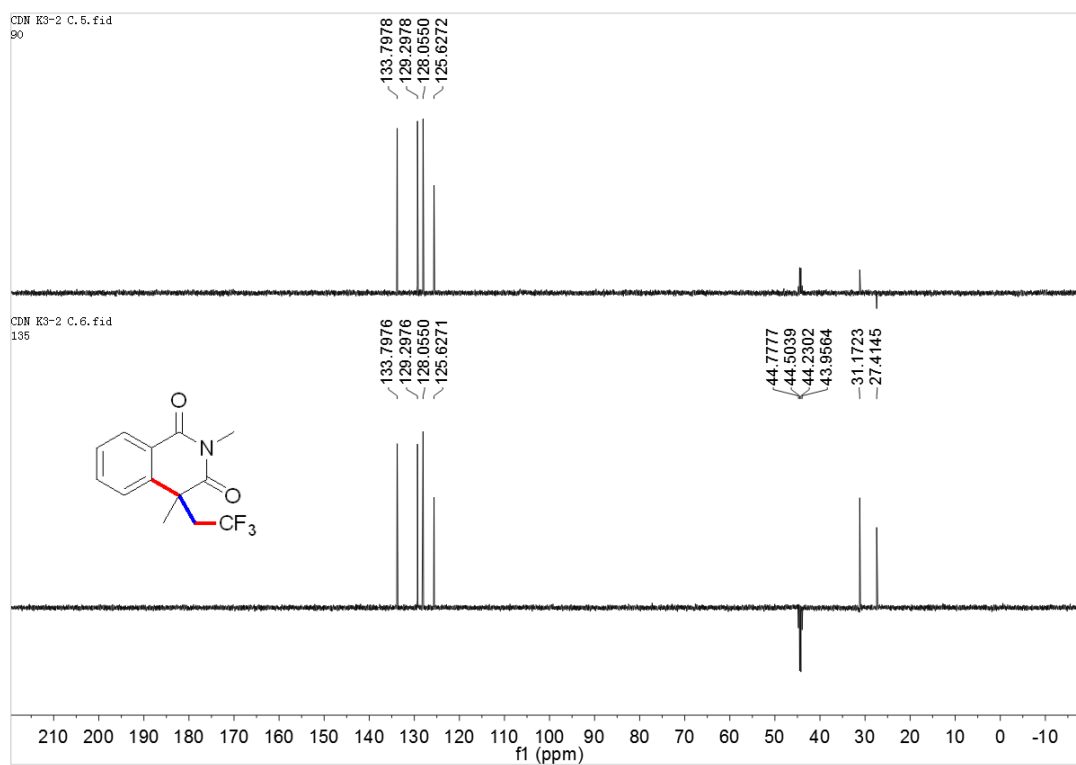

### <sup>19</sup>F NMR

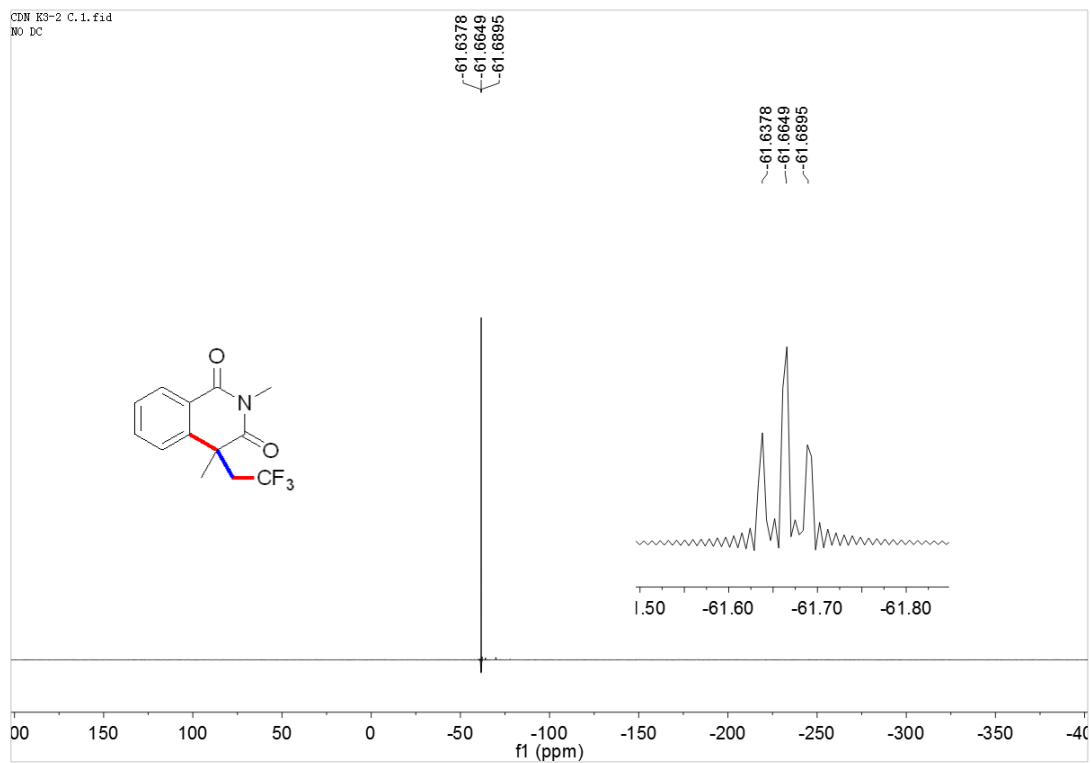

### 9e, <sup>1</sup>H NMR

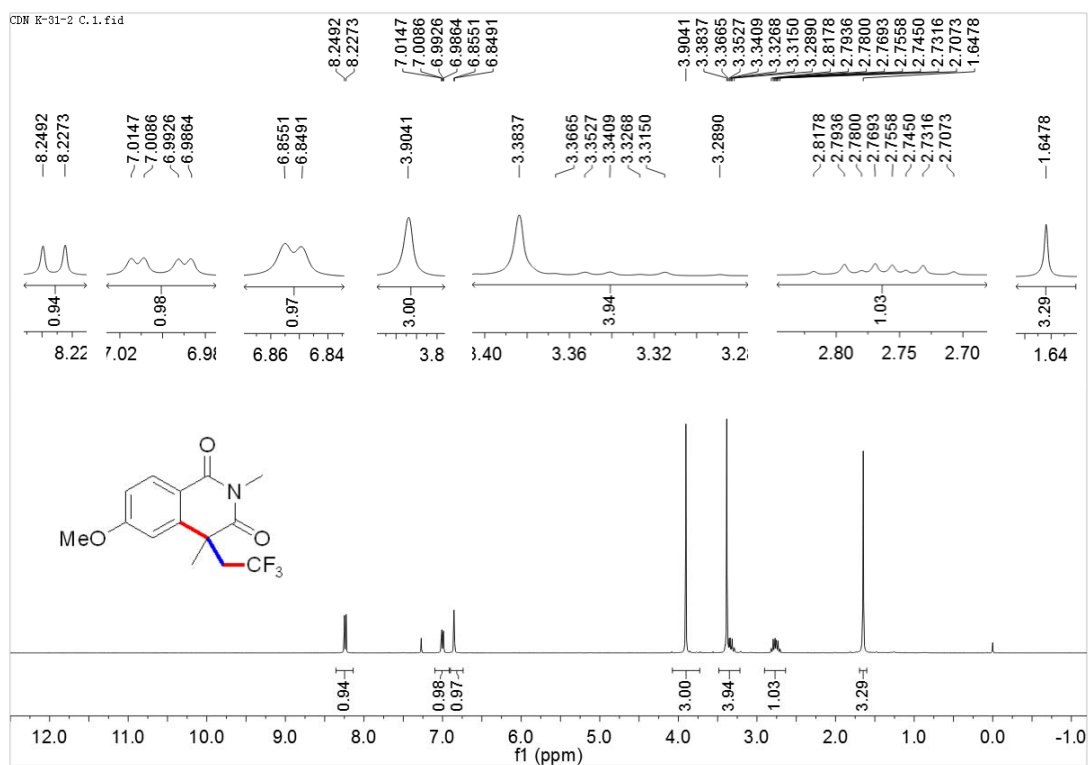

### <sup>13</sup>C NMR

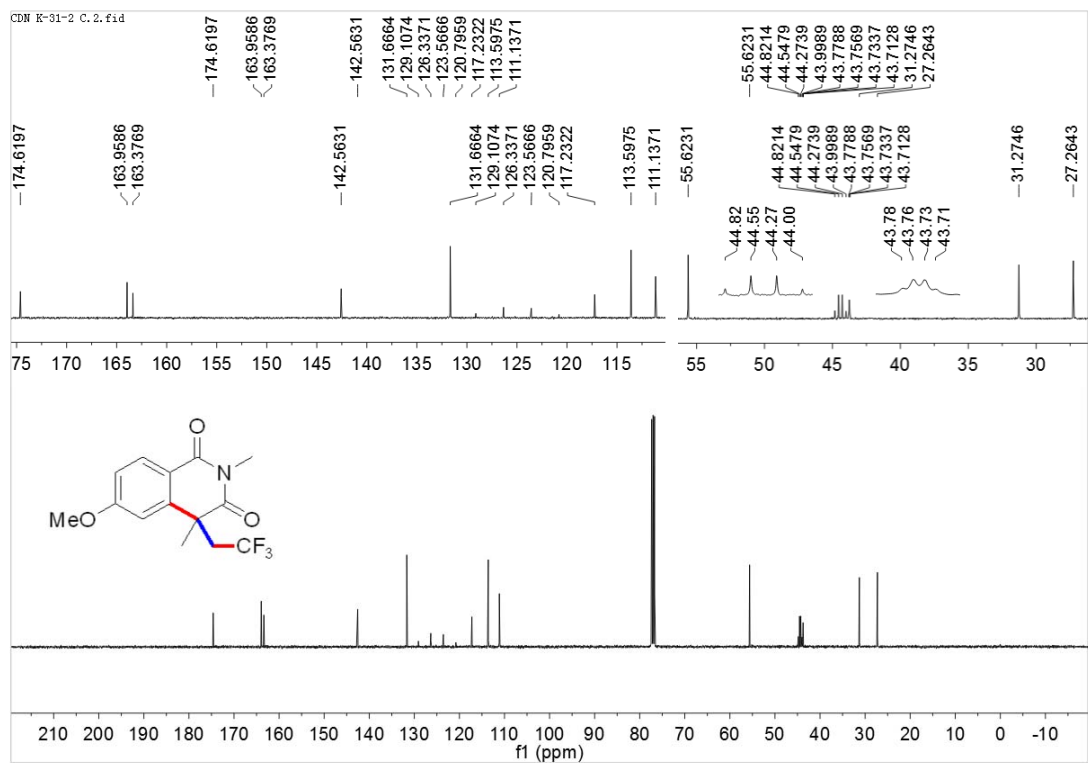



# DEPT 90 and DEPT 135

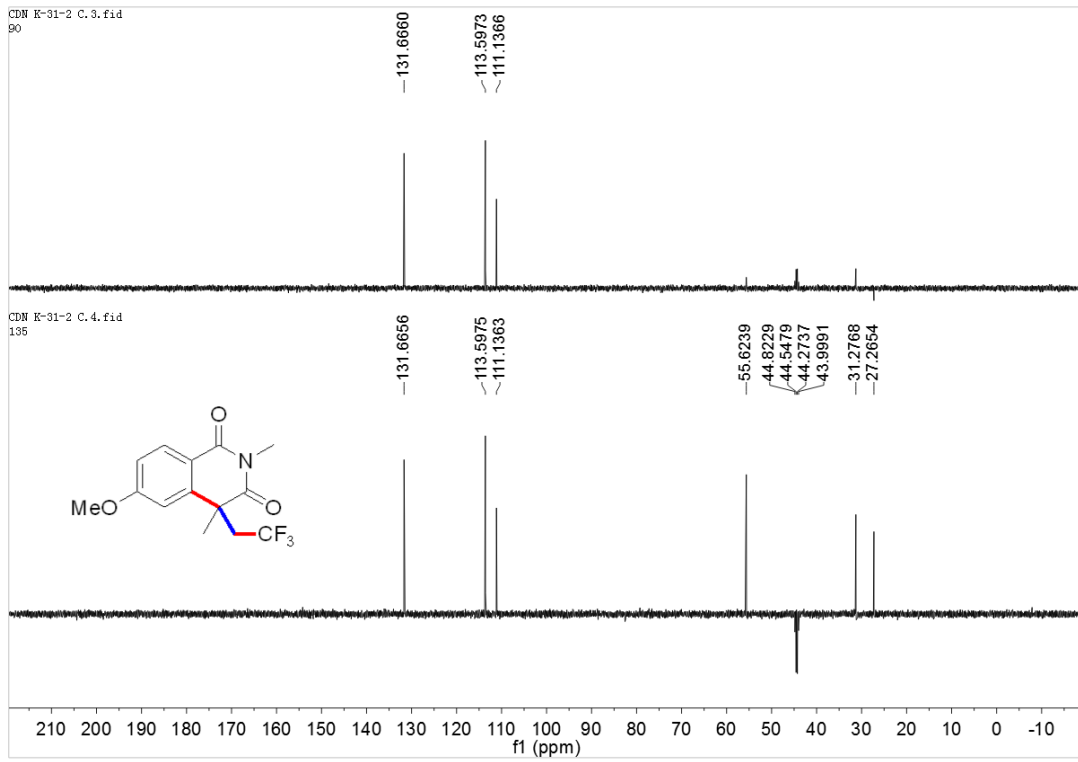

# <sup>19</sup>F NMR

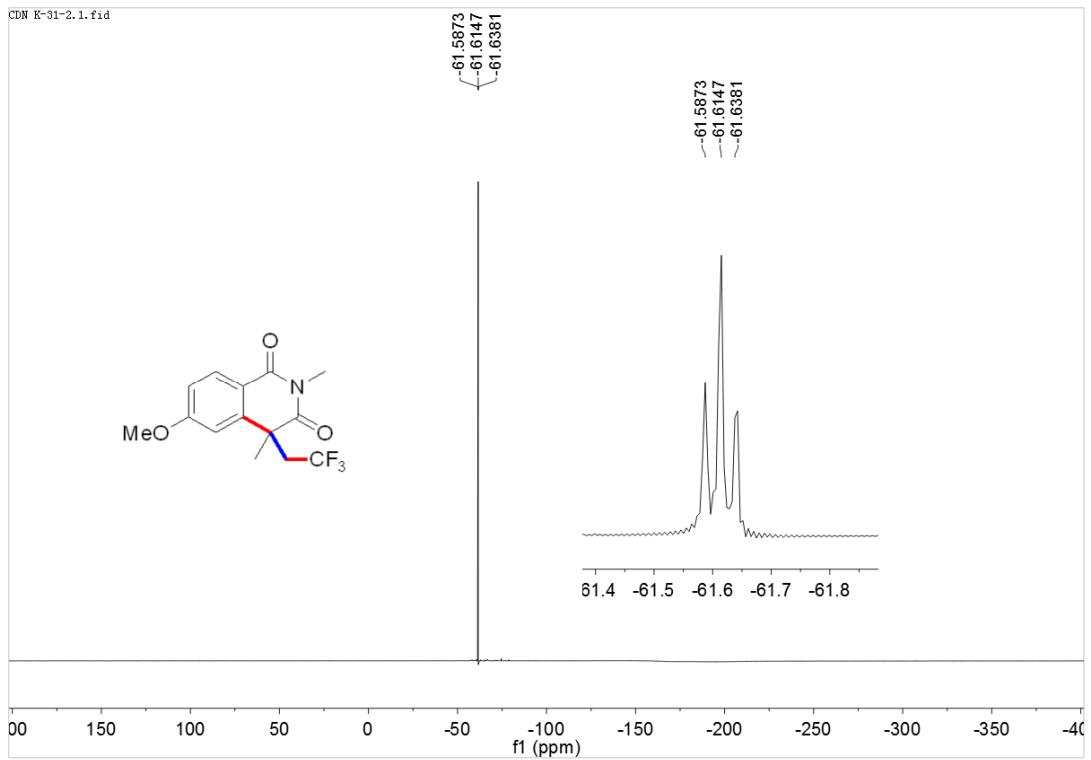

9f, <sup>1</sup>H NMR

CDN K-35-2. 1. fid

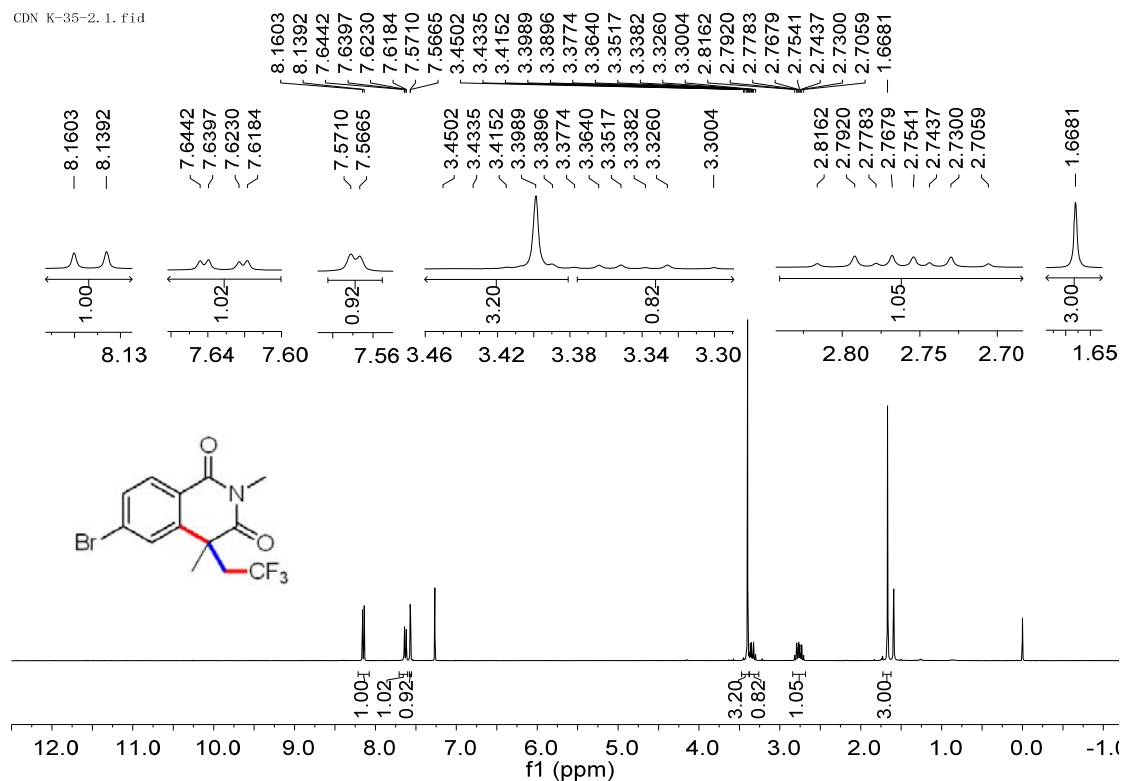

<sup>13</sup>C NMR

CDN K-35-2 C. 2. fid

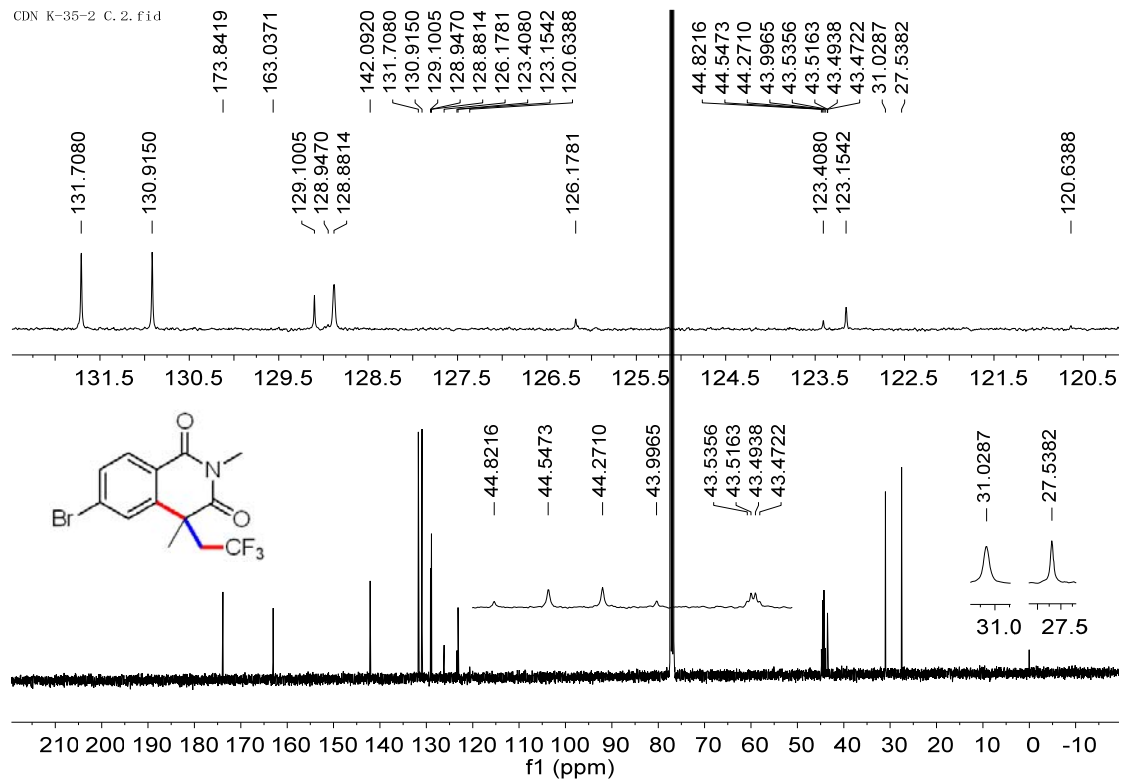

## DEPT 90 and DEPT 135

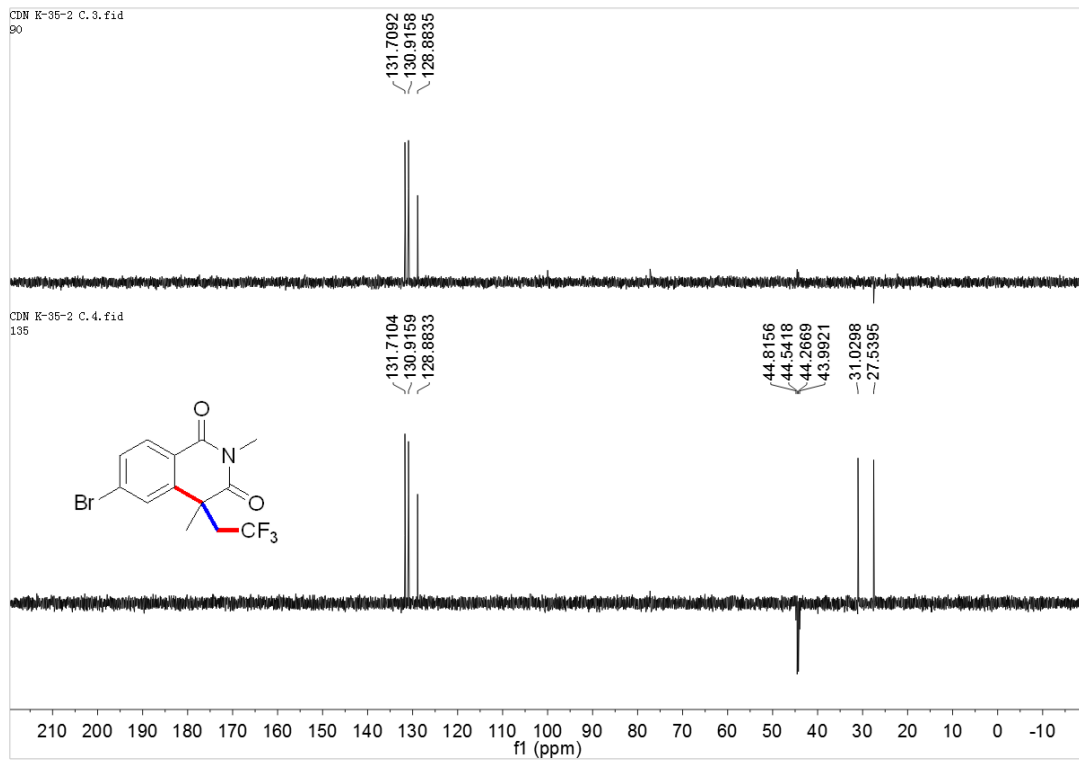

## <sup>19</sup>F NMR

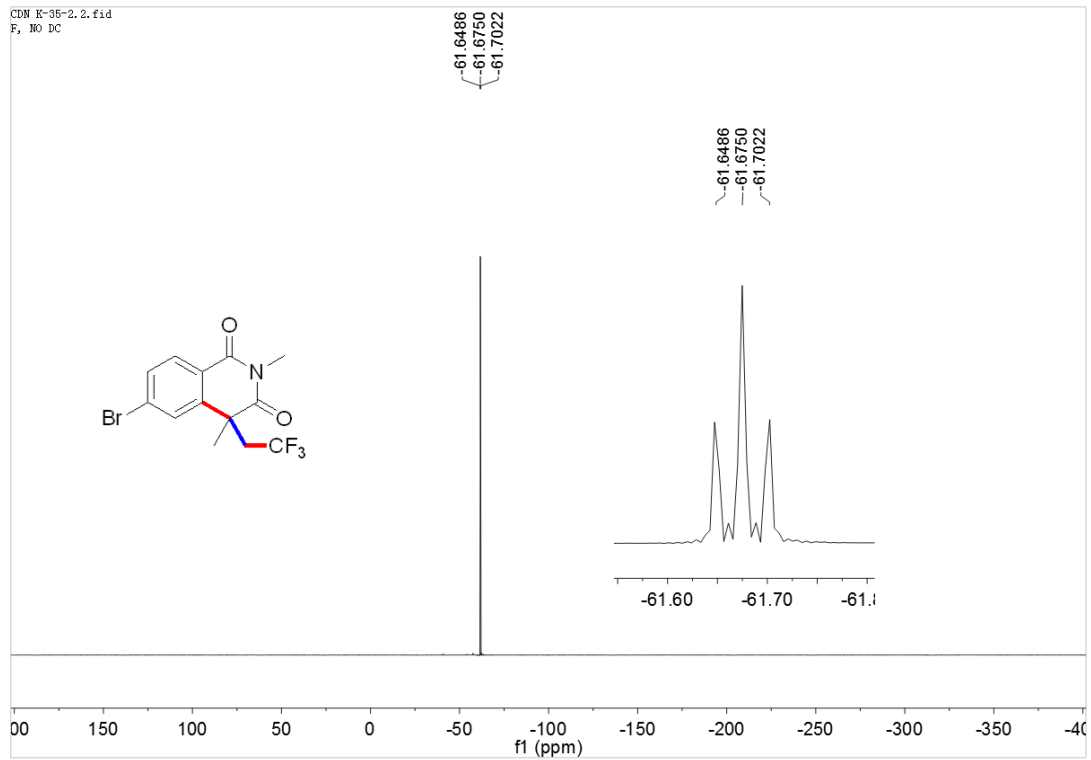

# 11, <sup>1</sup>H NMR

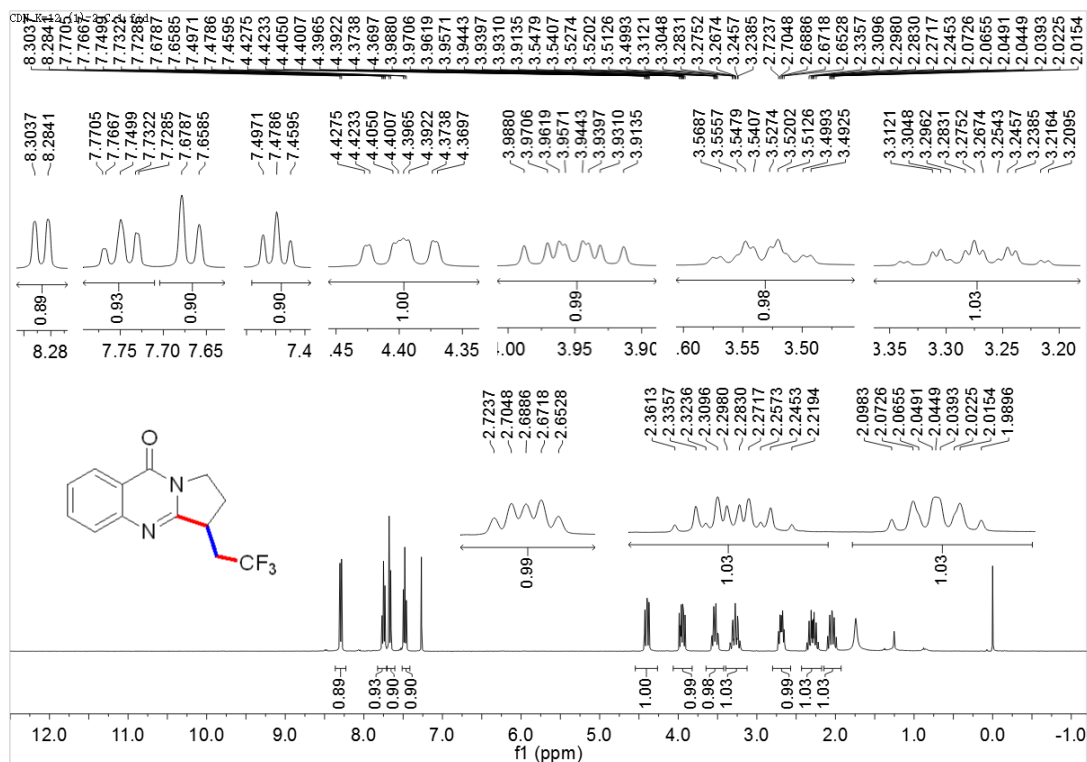

# <sup>13</sup>C NMR

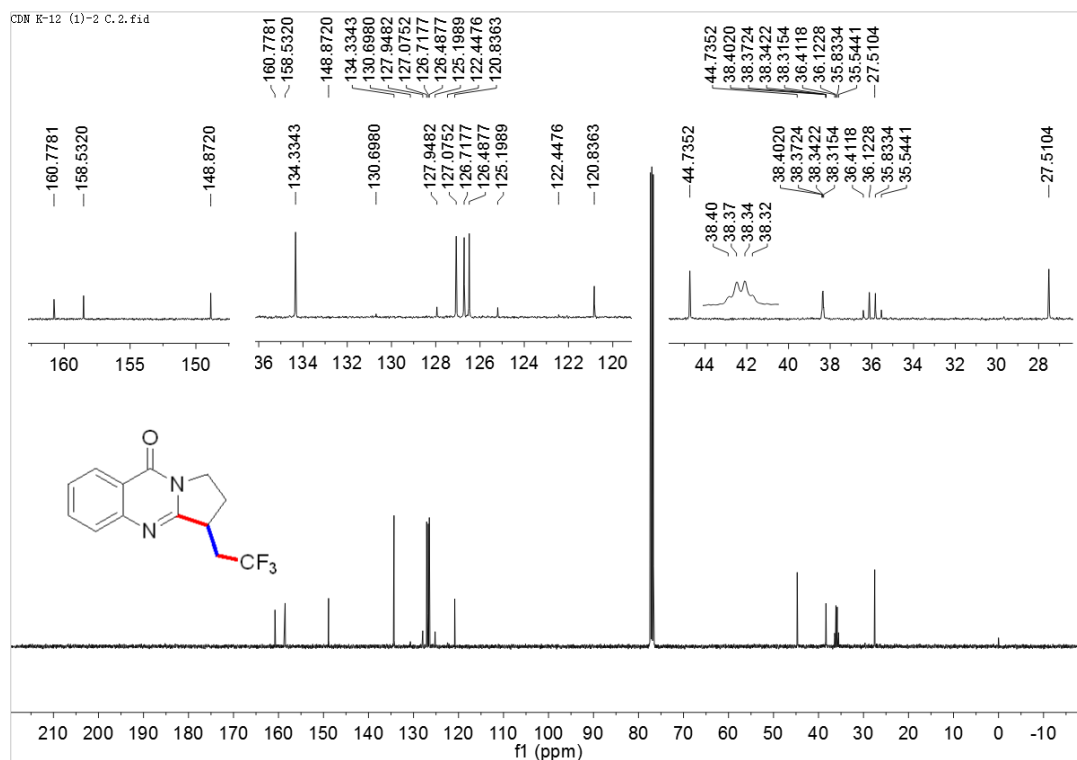

### DEPT 90 and DEPT 135

CDN K-12 (1)-2 C. 3. fid  
90

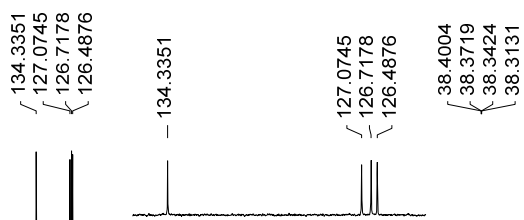

CDN K-12 (1)-2 C. 4. fid  
135

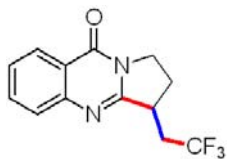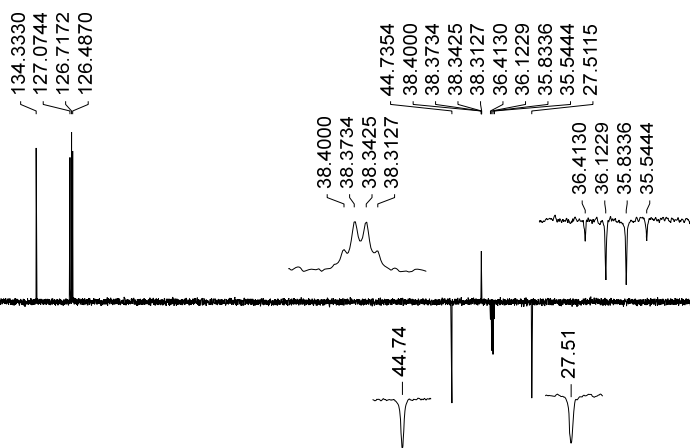

210 200 190 180 170 160 150 140 130 120 110 100 90 80 70 60 50 40 30 20 10 0 -10  
f1 (ppm)

### <sup>19</sup>F NMR

CDN K-12 (1)-2.2. fid

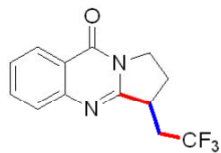

64.6548  
64.6626  
64.7108

64.6548  
64.6626  
64.7108

64.55 -64.65 -64.75 -64.1

00 150 100 50 0 -50 -100 -150 -200 -250 -300 -350 -400  
f1 (ppm)



### DEPT 90 and DEPT 135

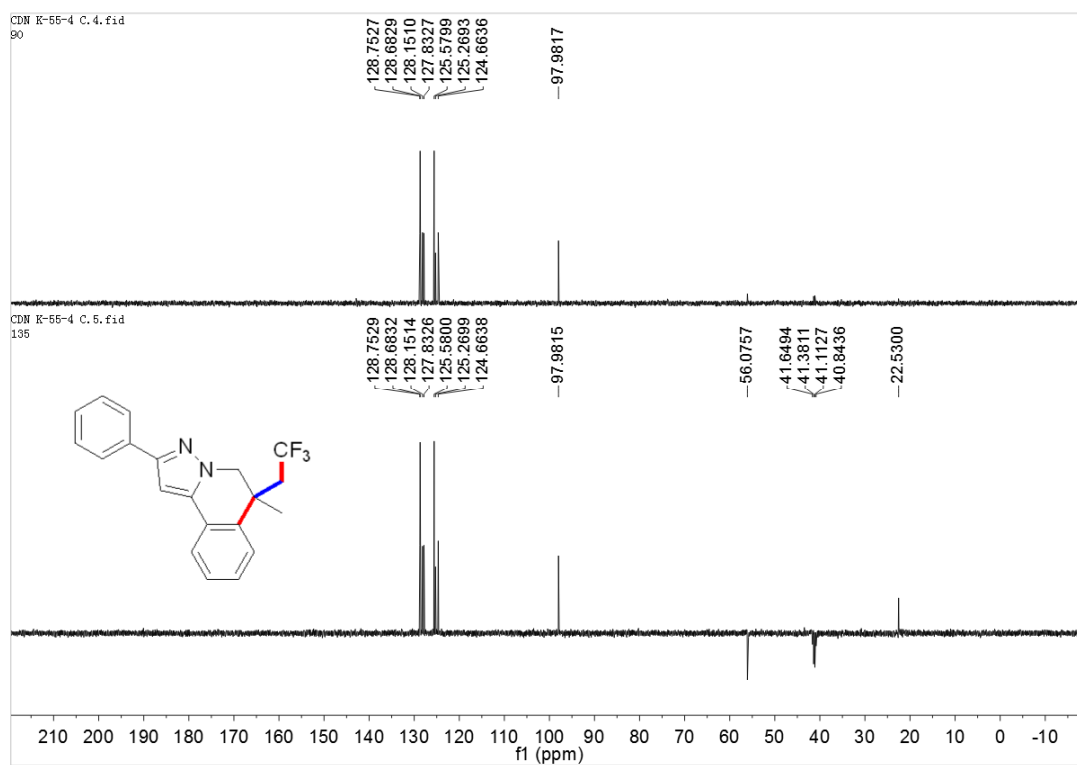

### <sup>19</sup>F NMR

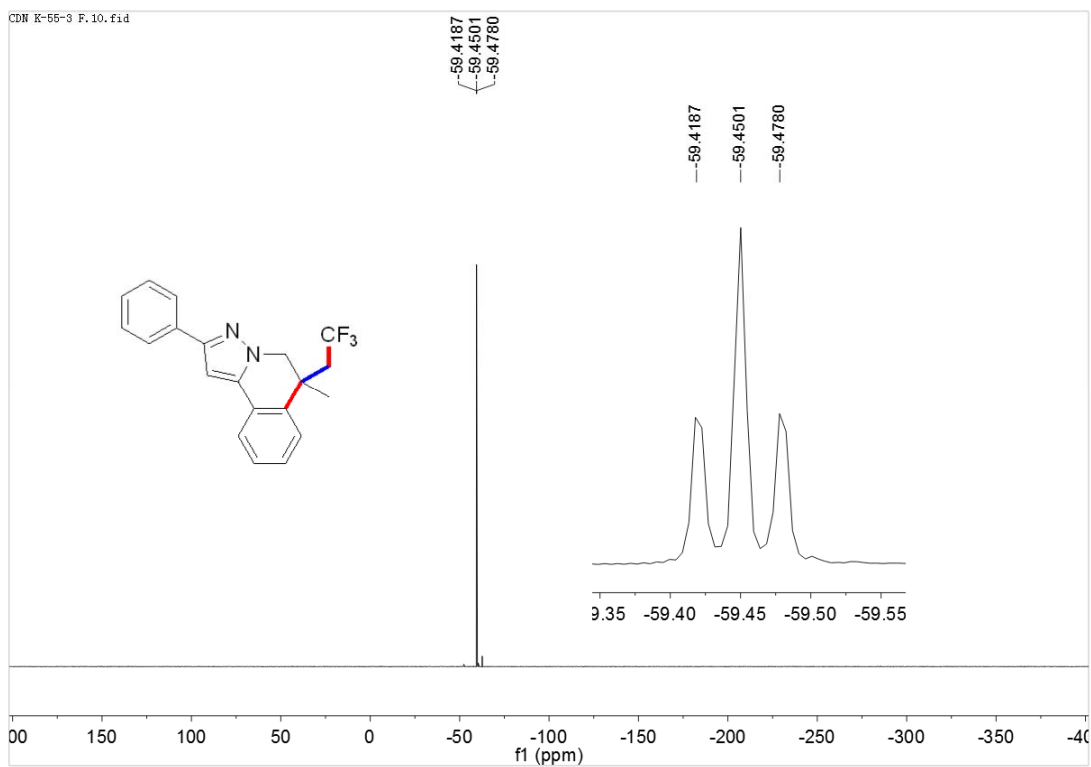

### 13b, <sup>1</sup>H NMR

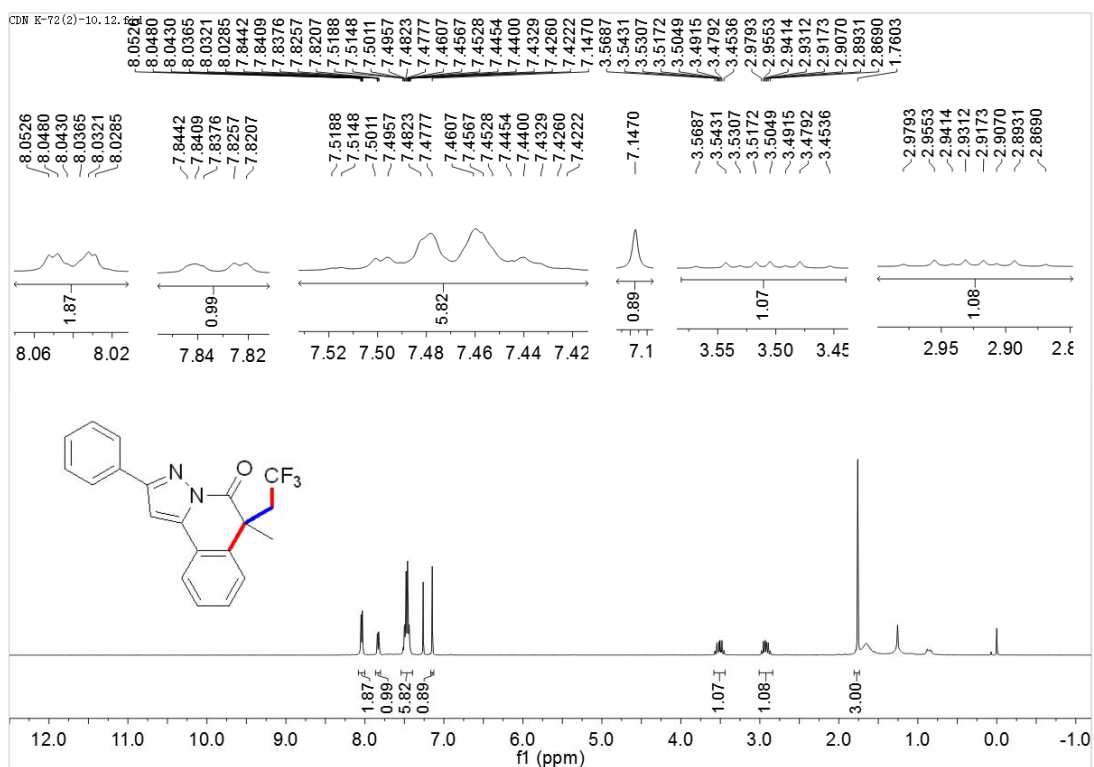

### <sup>13</sup>C NMR

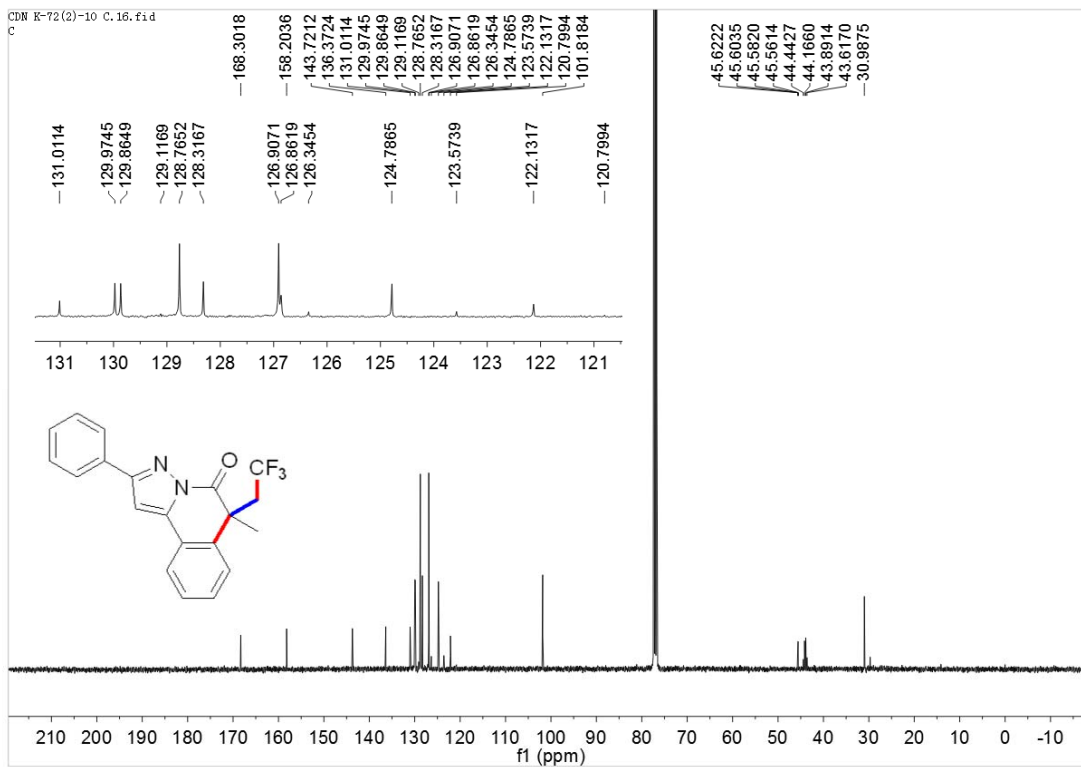



## DEPT 90 and DEPT 135

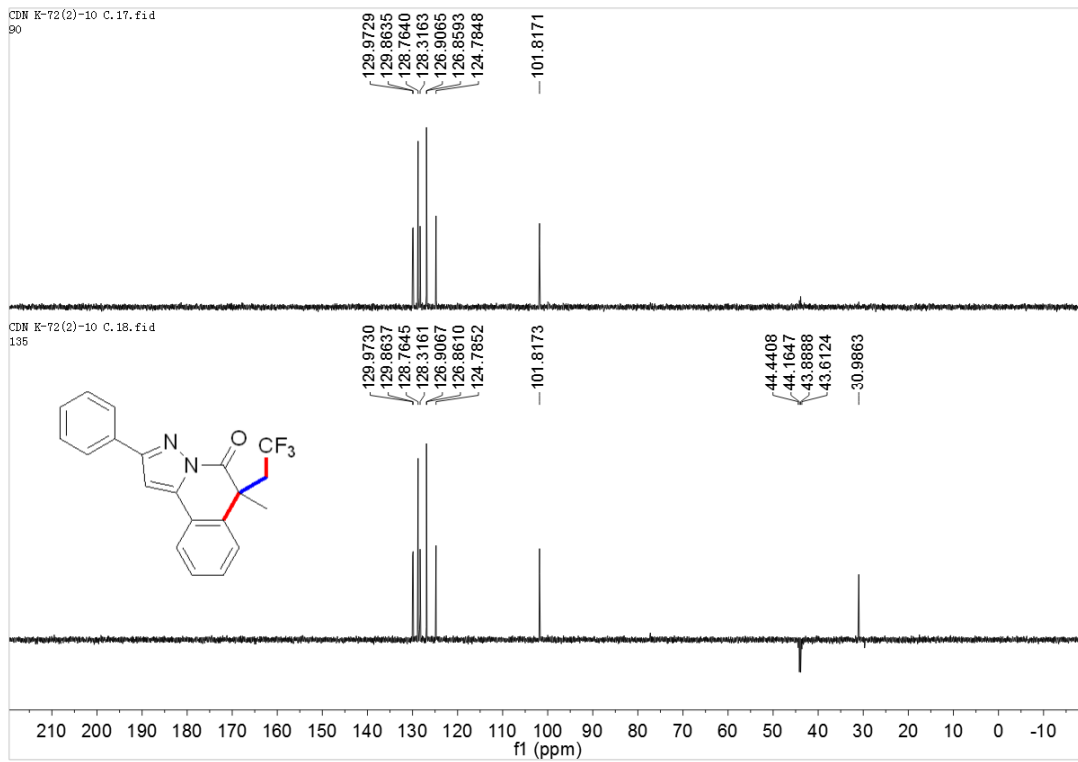

## <sup>19</sup>F NMR

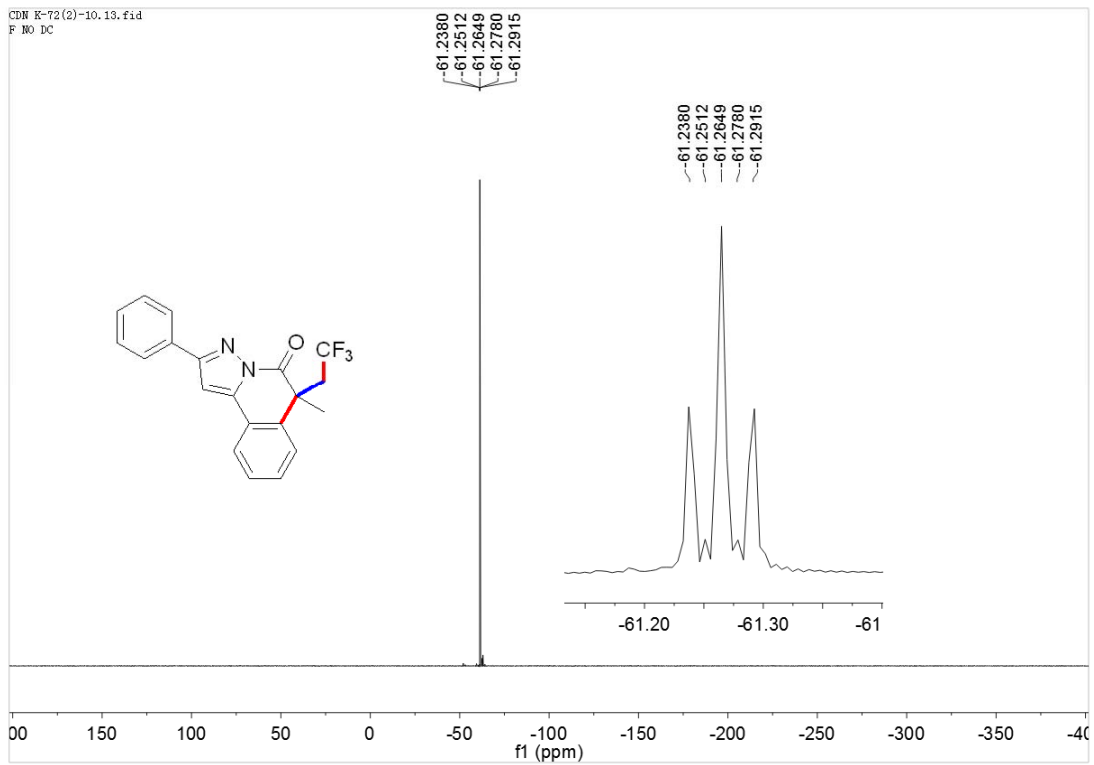

# 15, <sup>1</sup>H NMR

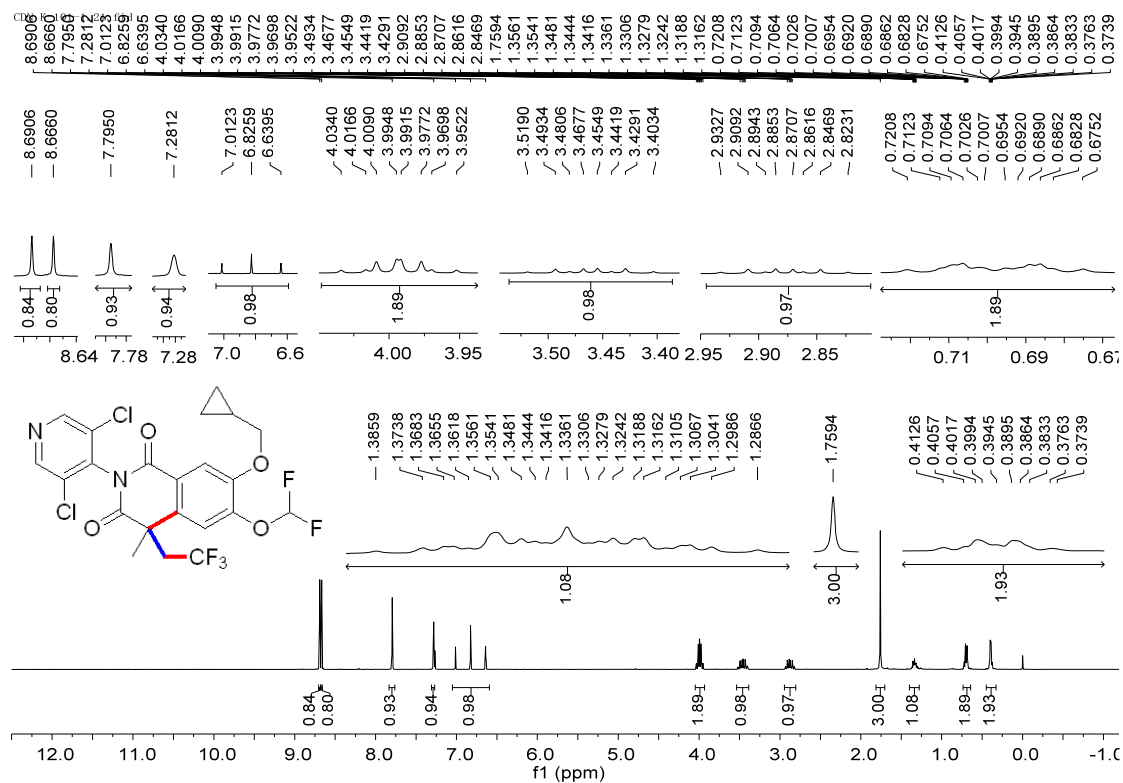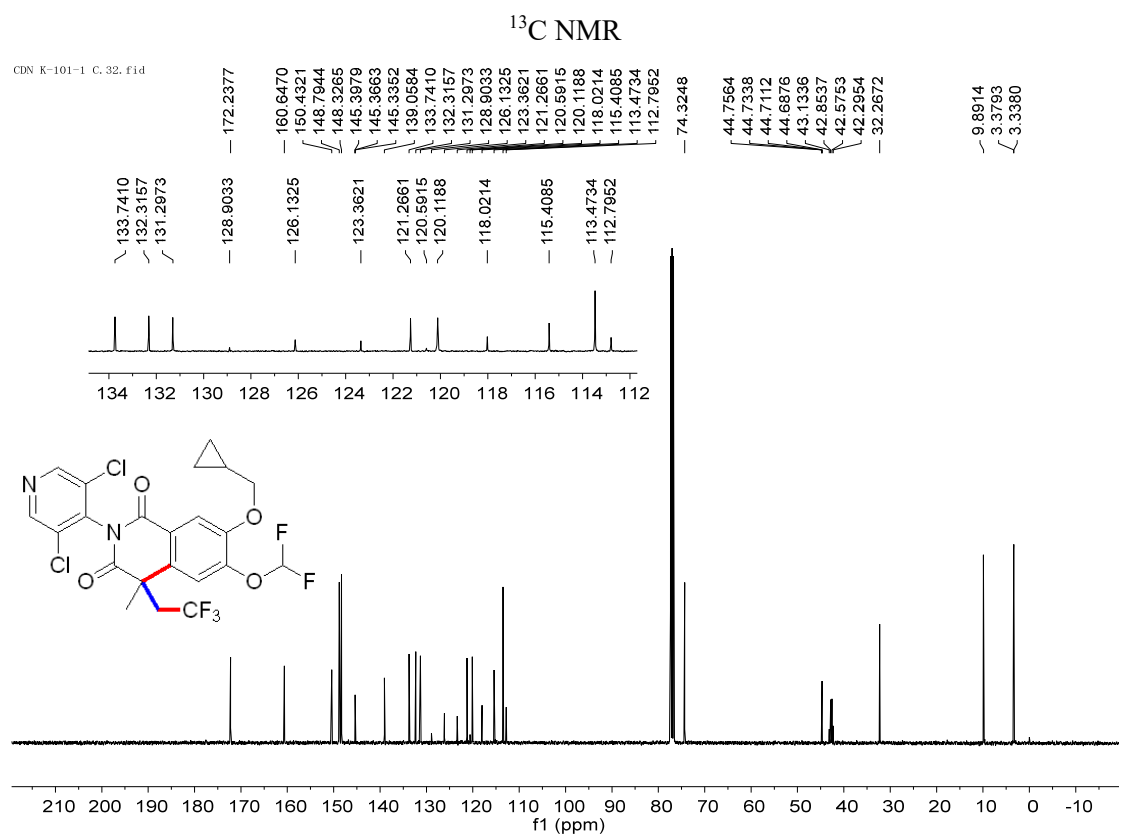

### DEPT 90 and DEPT 135

CDN K-101-1 C. 34. fid  
90

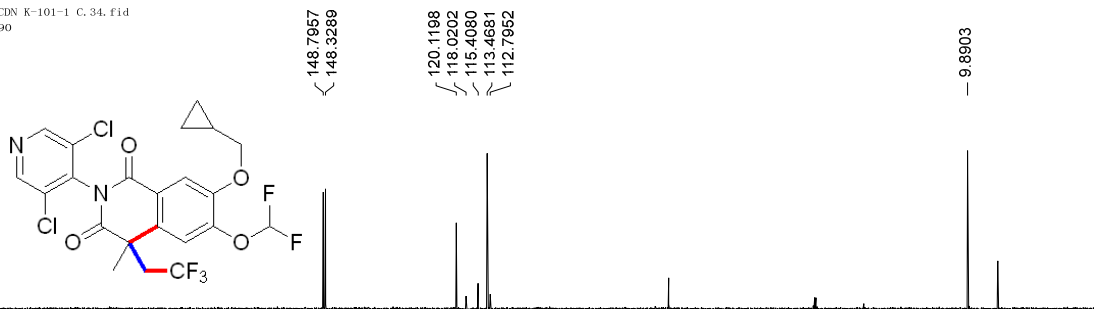

CDN K-101-1 C. 35. fid  
135

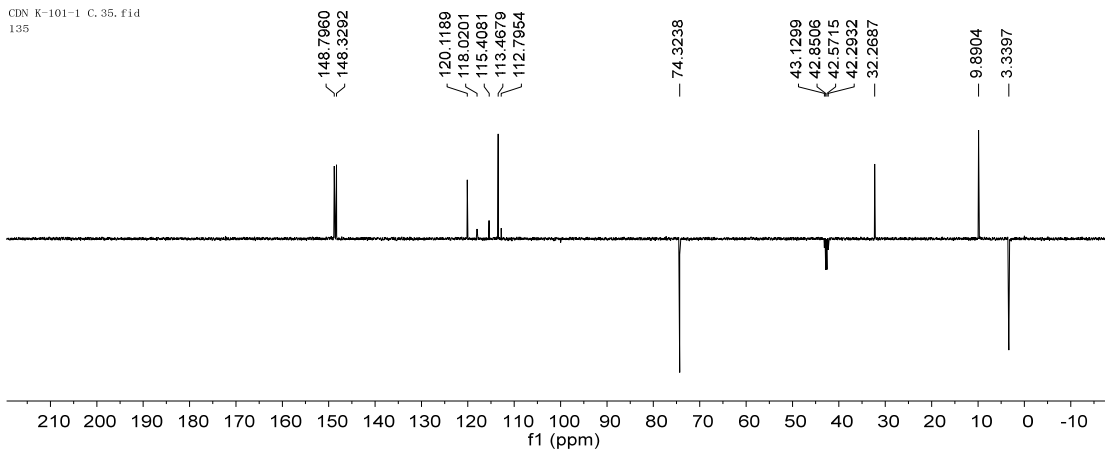

### <sup>19</sup>F NMR

CDN K-101-1. 20. fid  
F NO DC

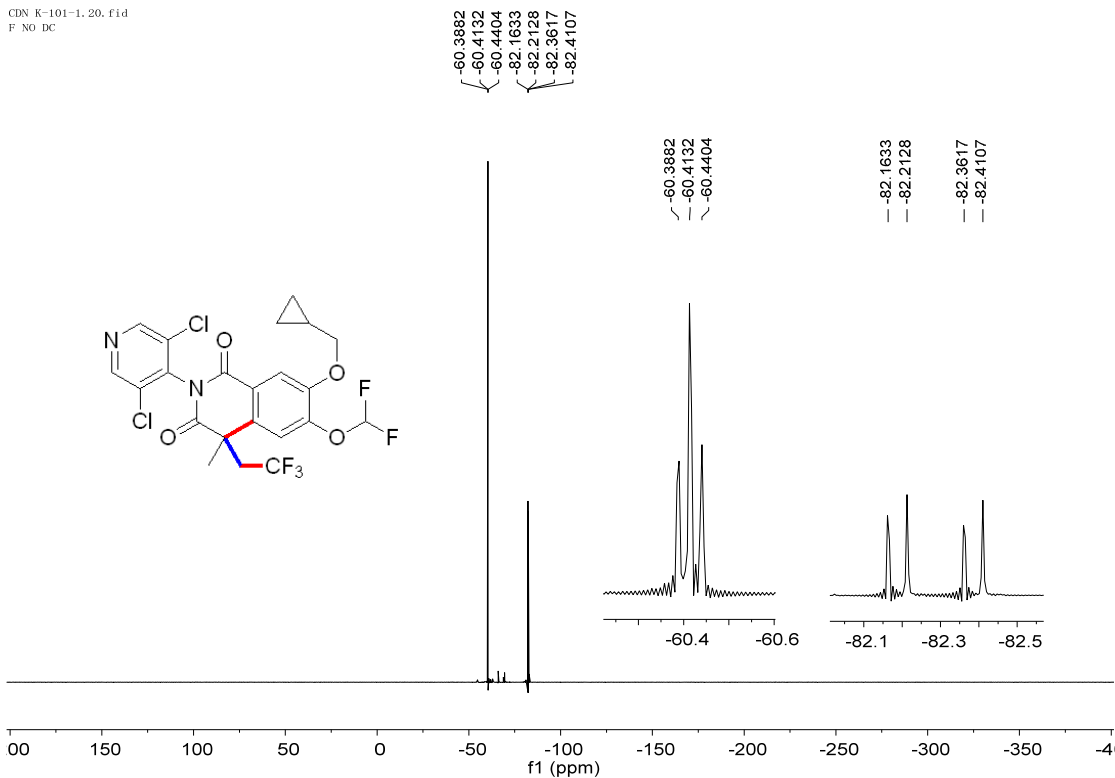







### DEPT 90 and DEPT 135

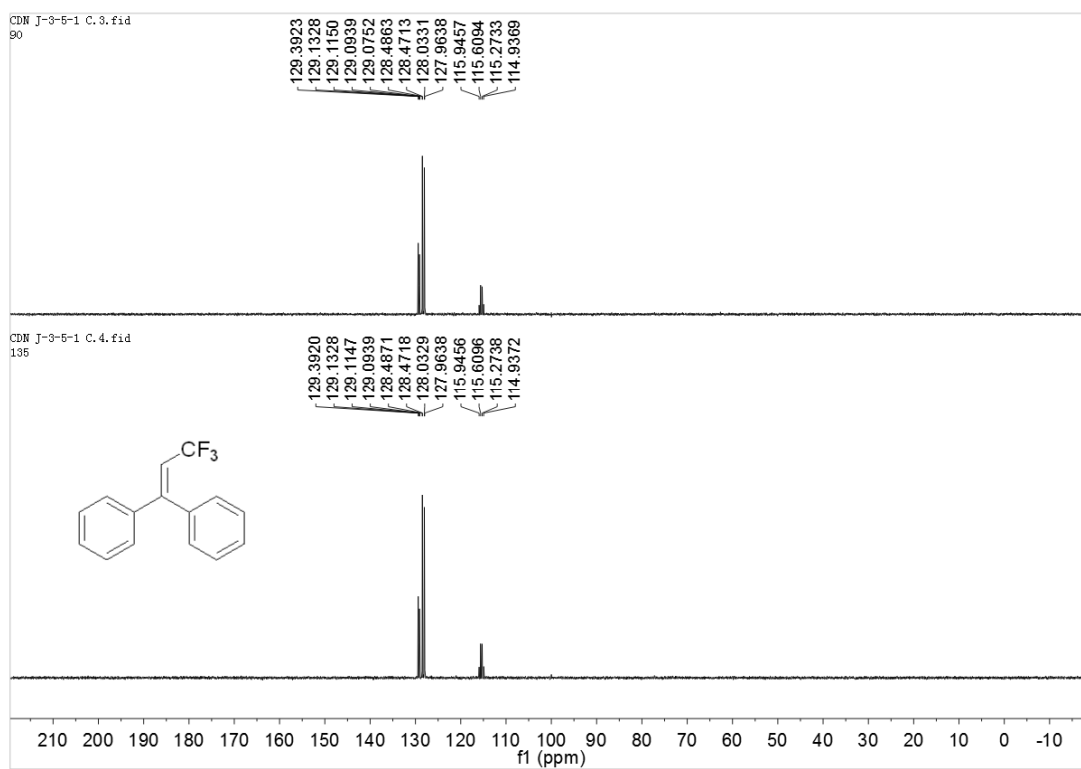

### <sup>19</sup>F NMR

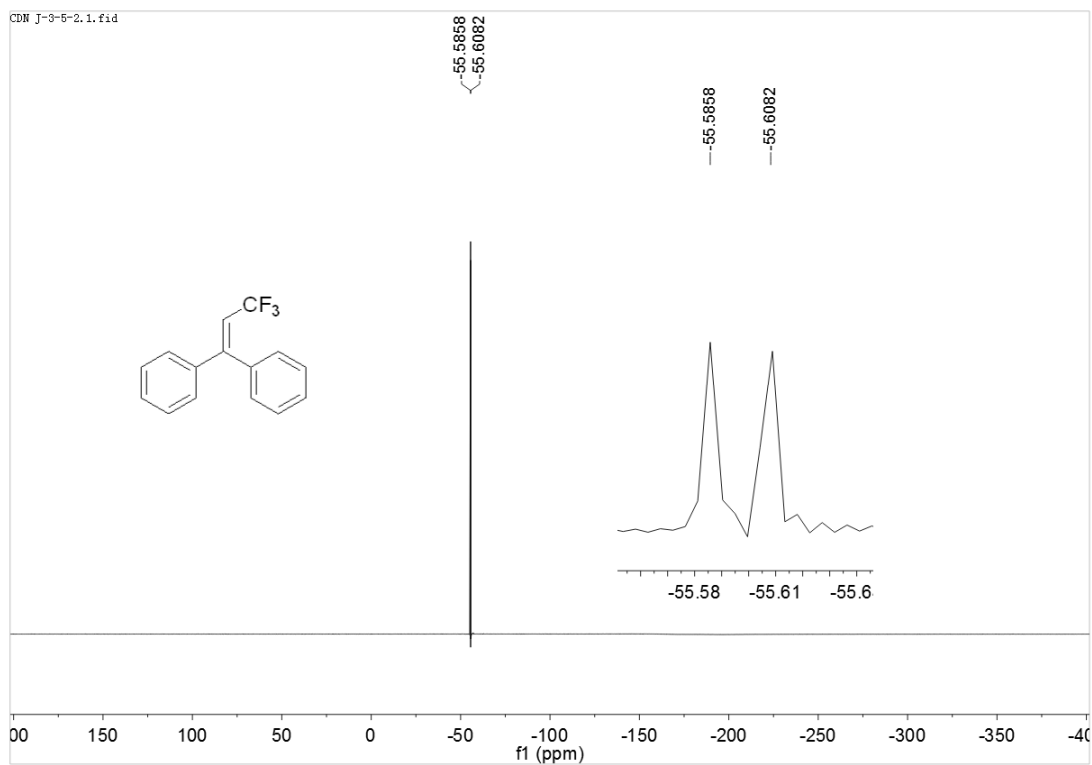

**1a, <sup>1</sup>H NMR**

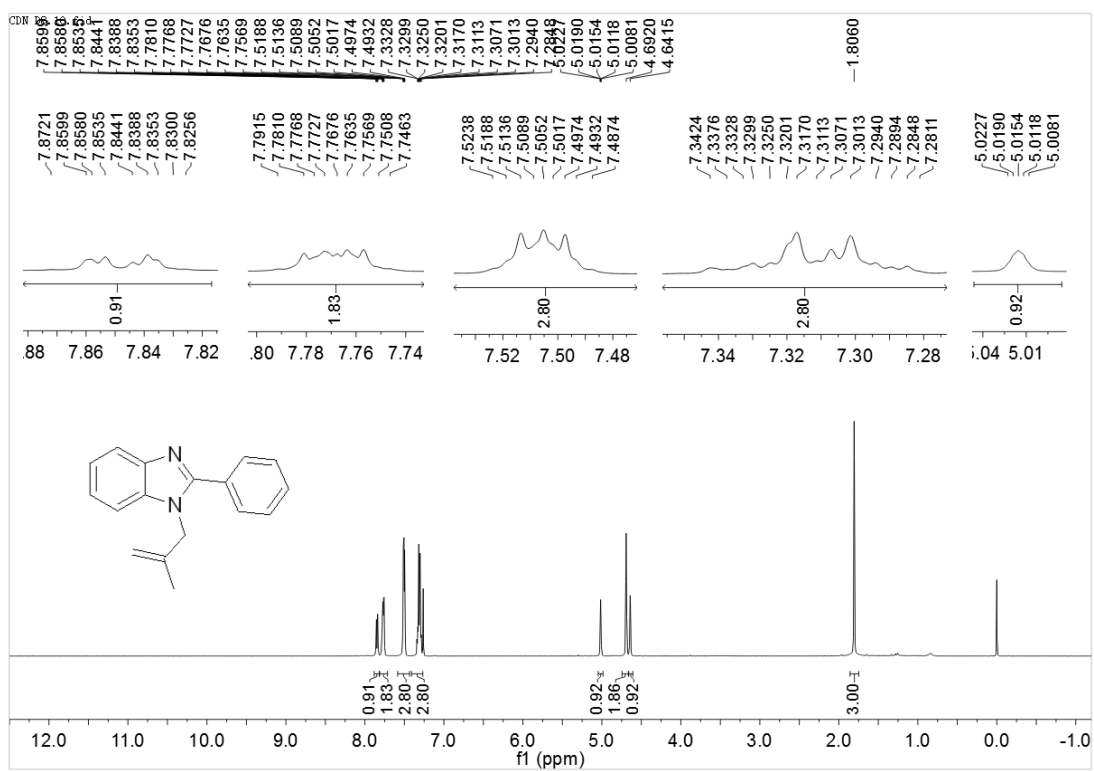

**<sup>13</sup>C NMR**

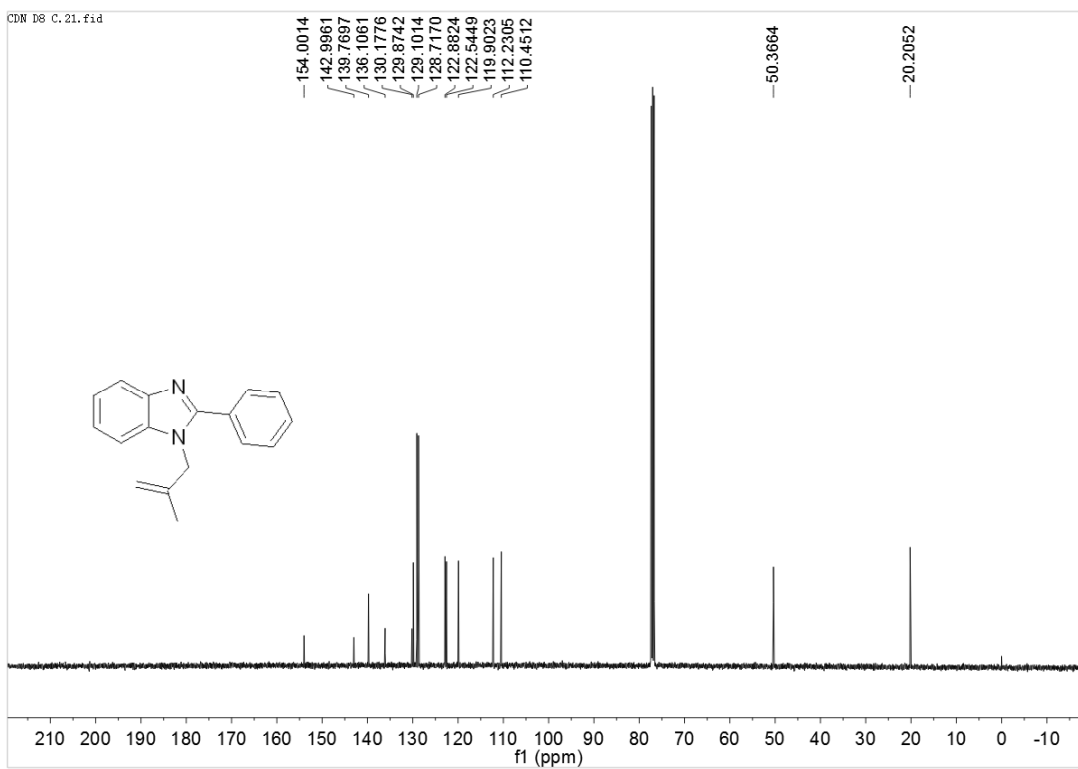



# DEPT 90 and DEPT 135

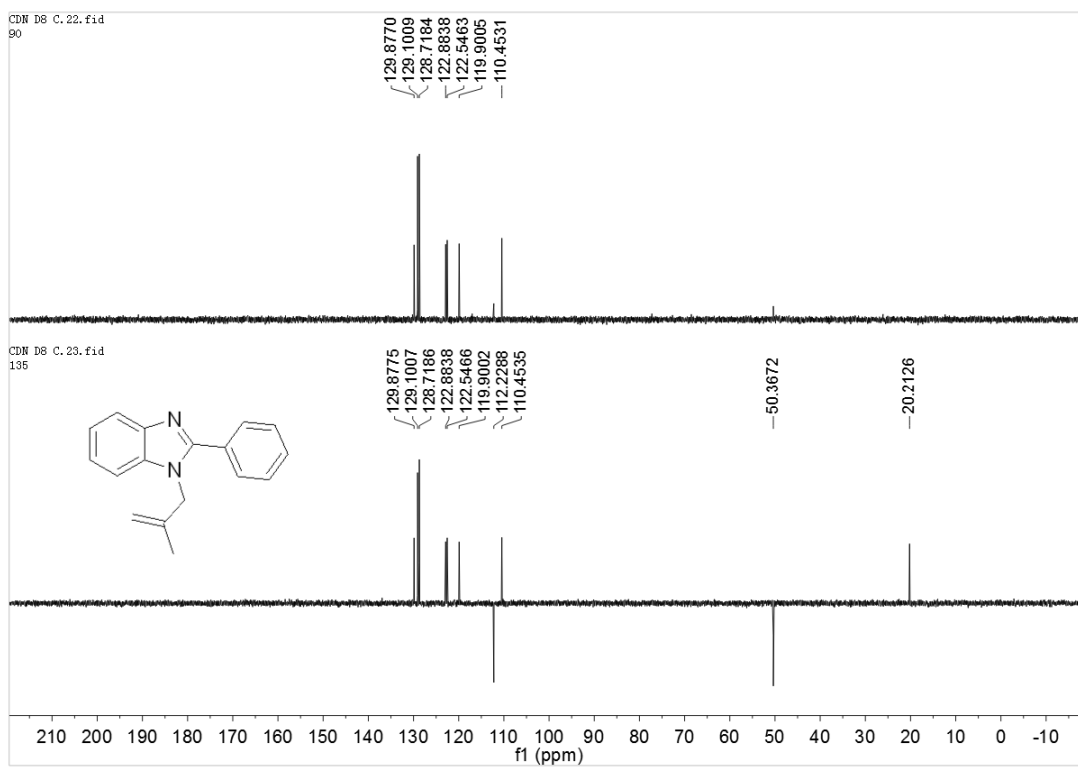

# 1c1, <sup>1</sup>H NMR

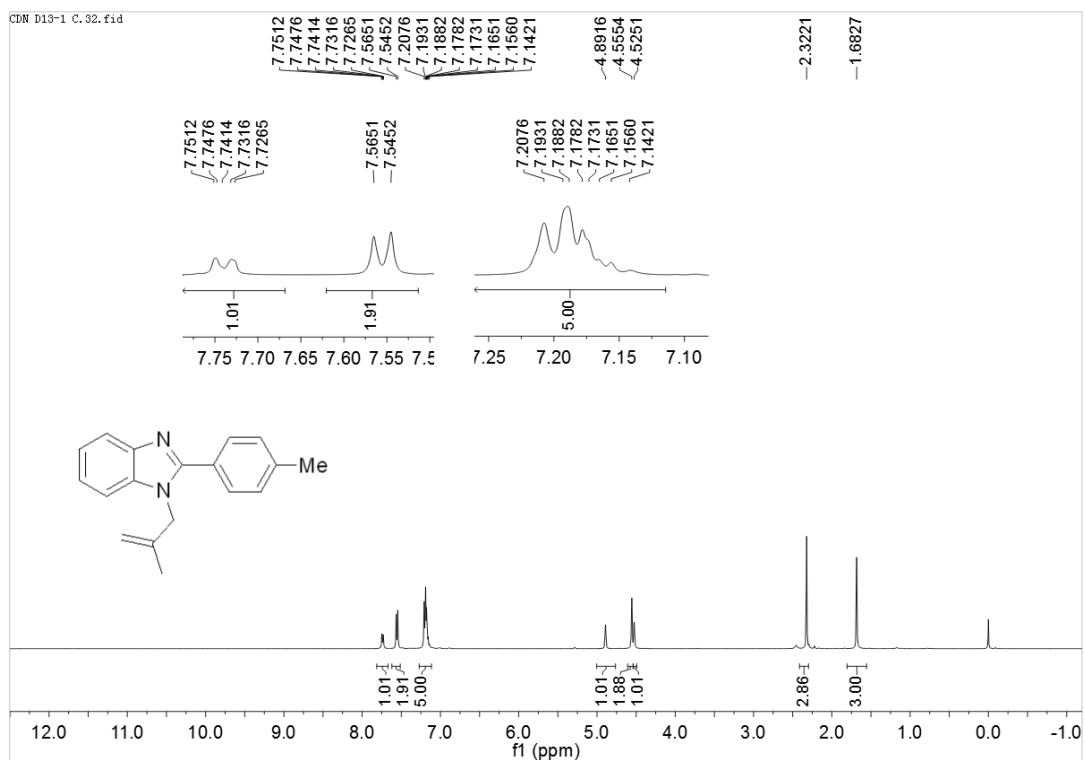

# <sup>13</sup>C NMR

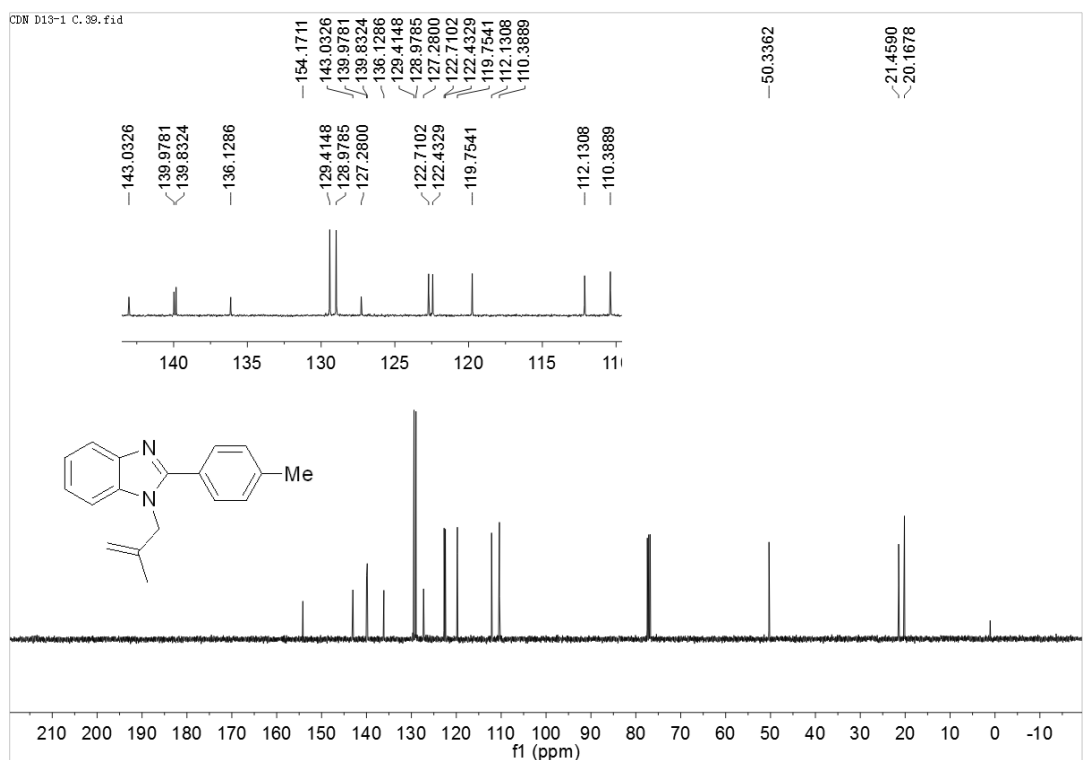

# DEPT 90 and DEPT 135

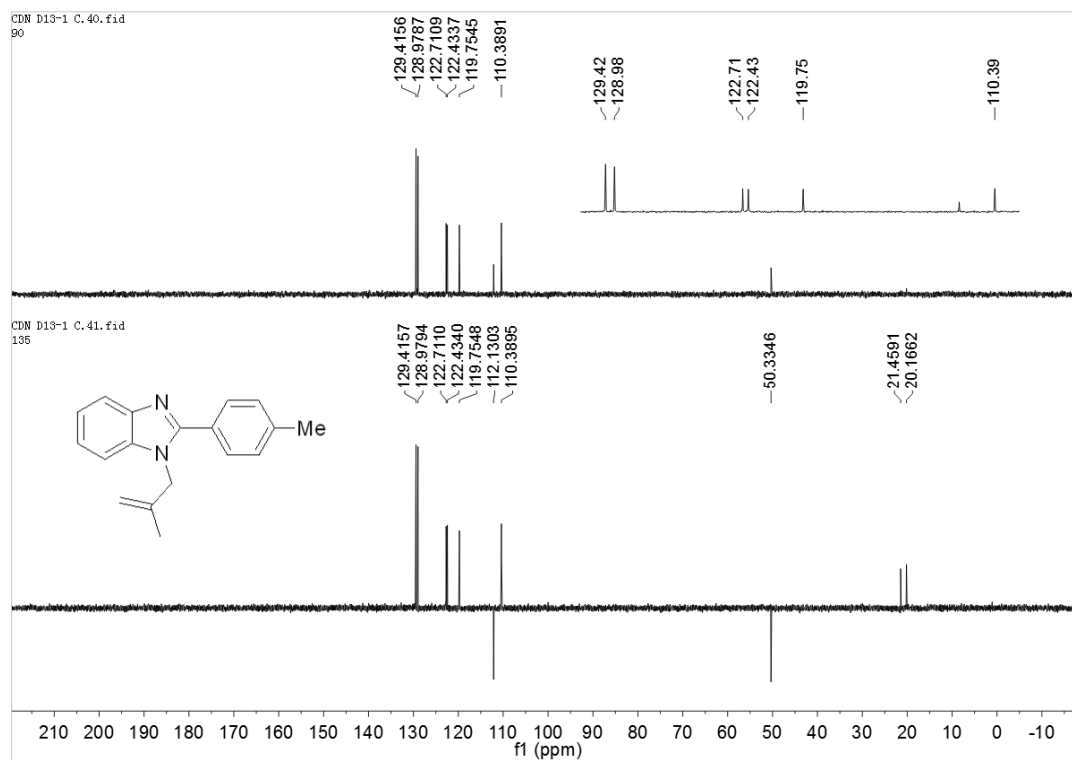

### 1c2, <sup>1</sup>H NMR

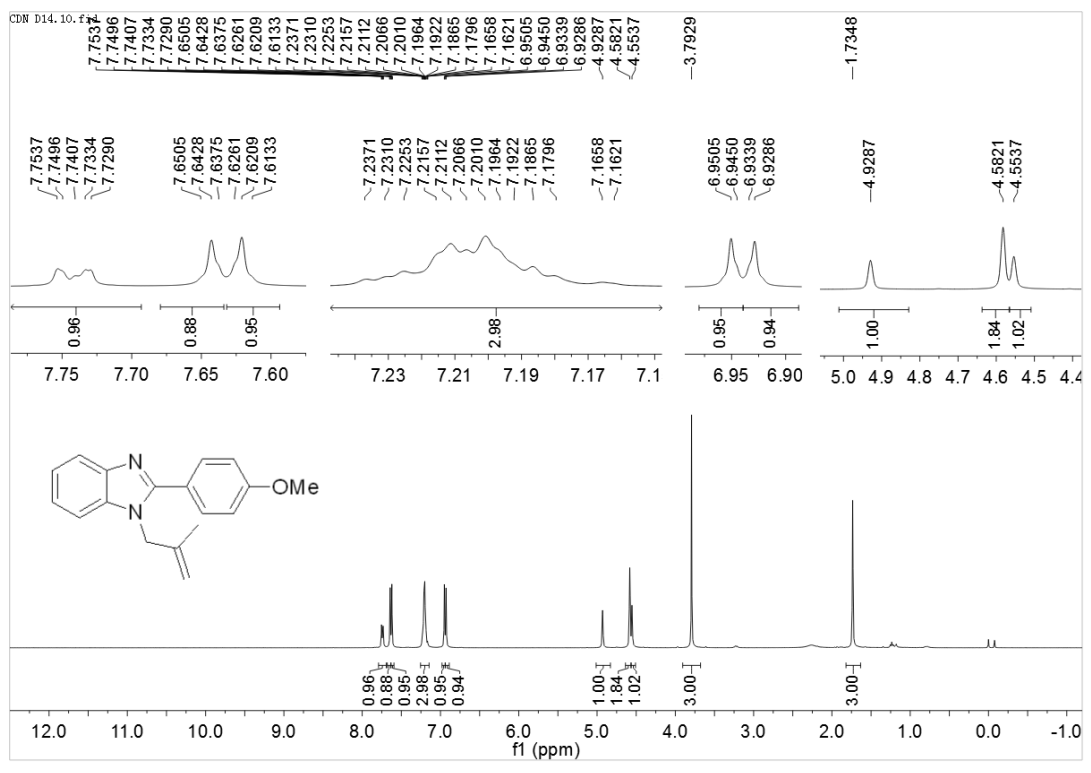

### <sup>13</sup>C NMR

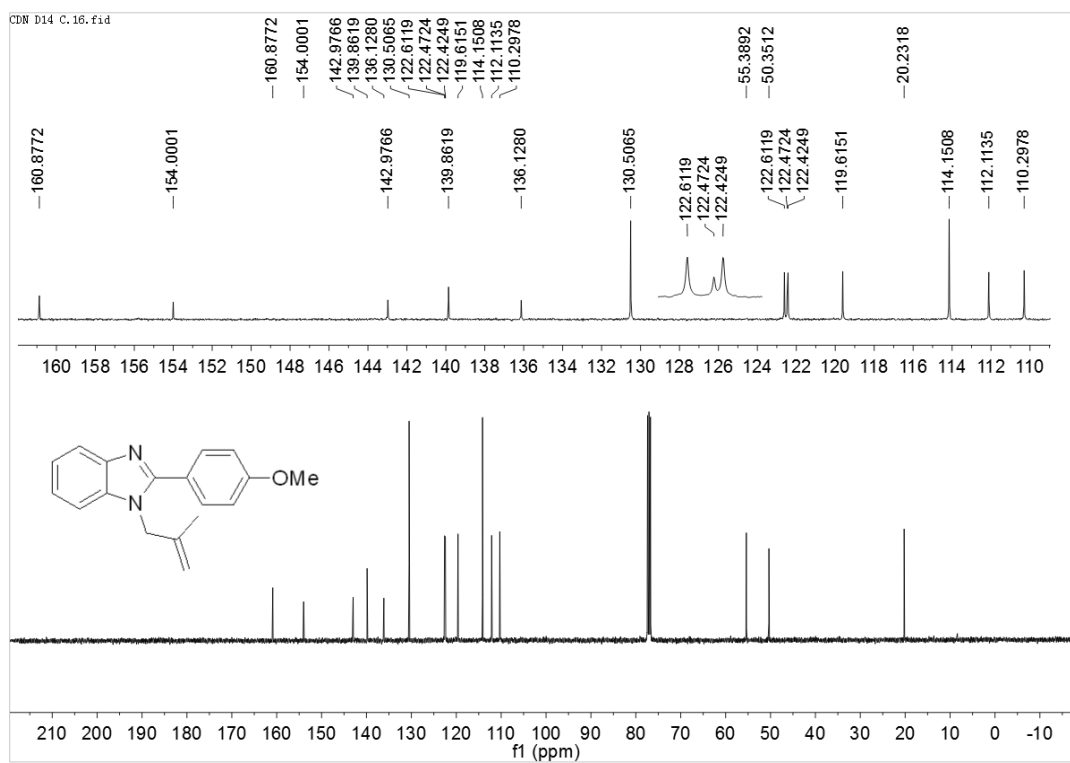

DEPT 90 and DEPT 135

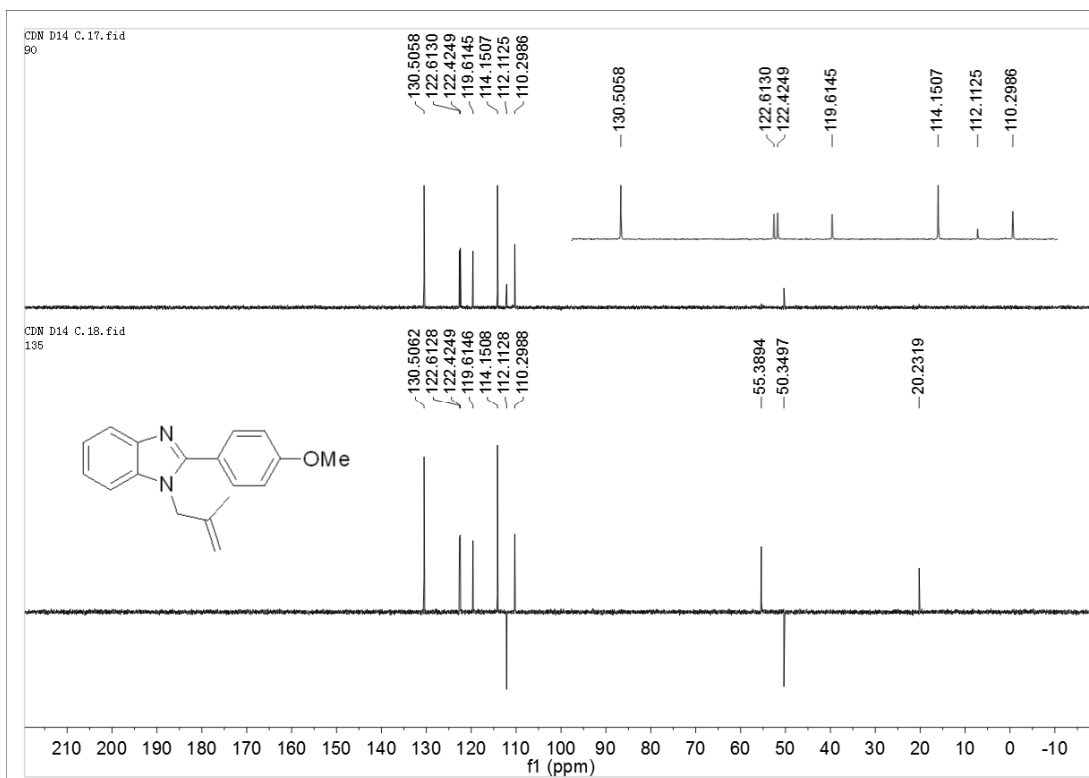

### 1c3, <sup>1</sup>H NMR

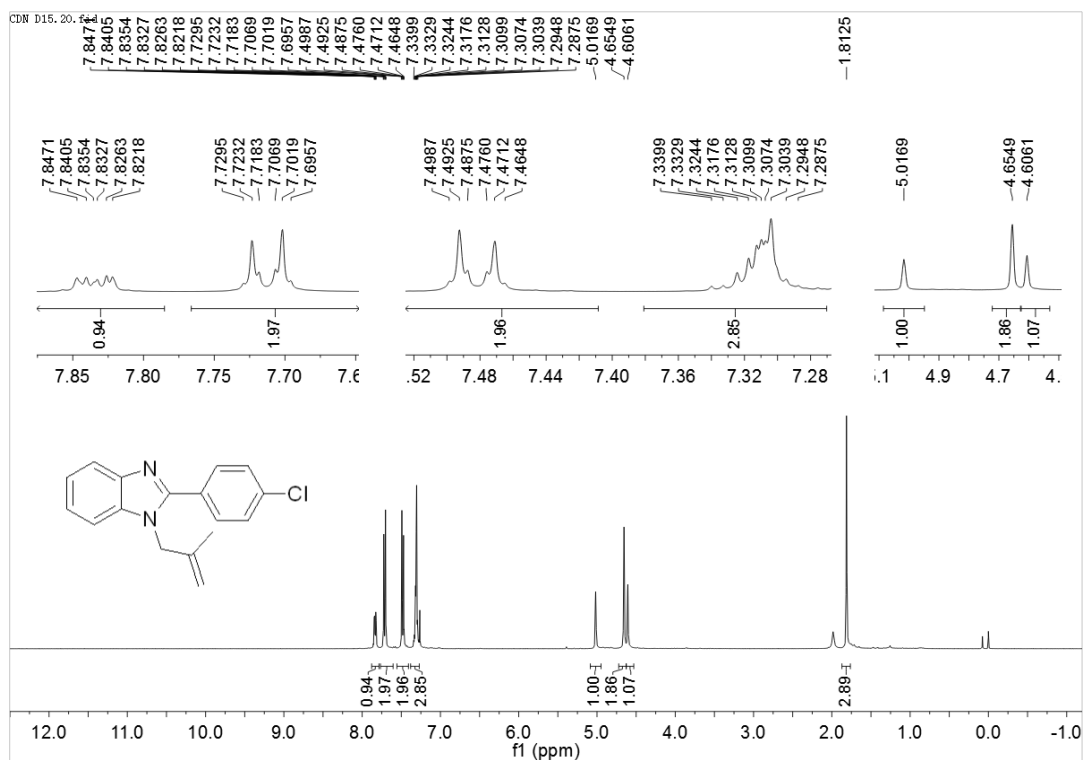

### <sup>13</sup>C NMR

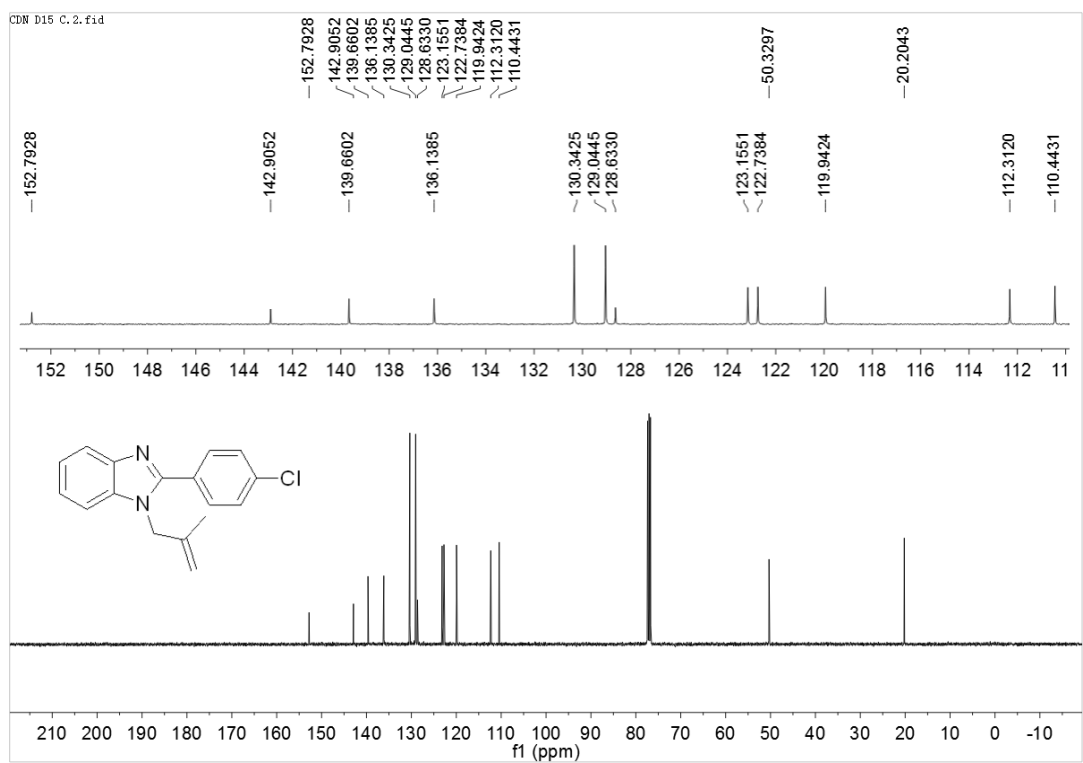

# DEPT 90 and DEPT 135

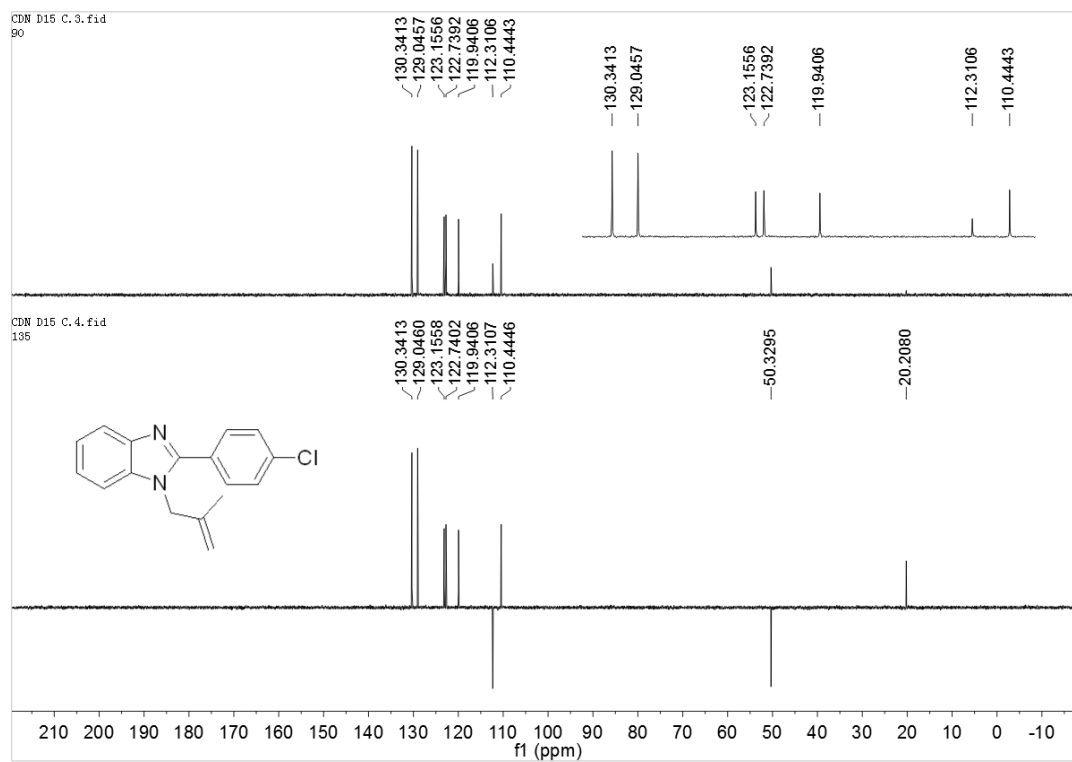

### 1c4, <sup>1</sup>H NMR

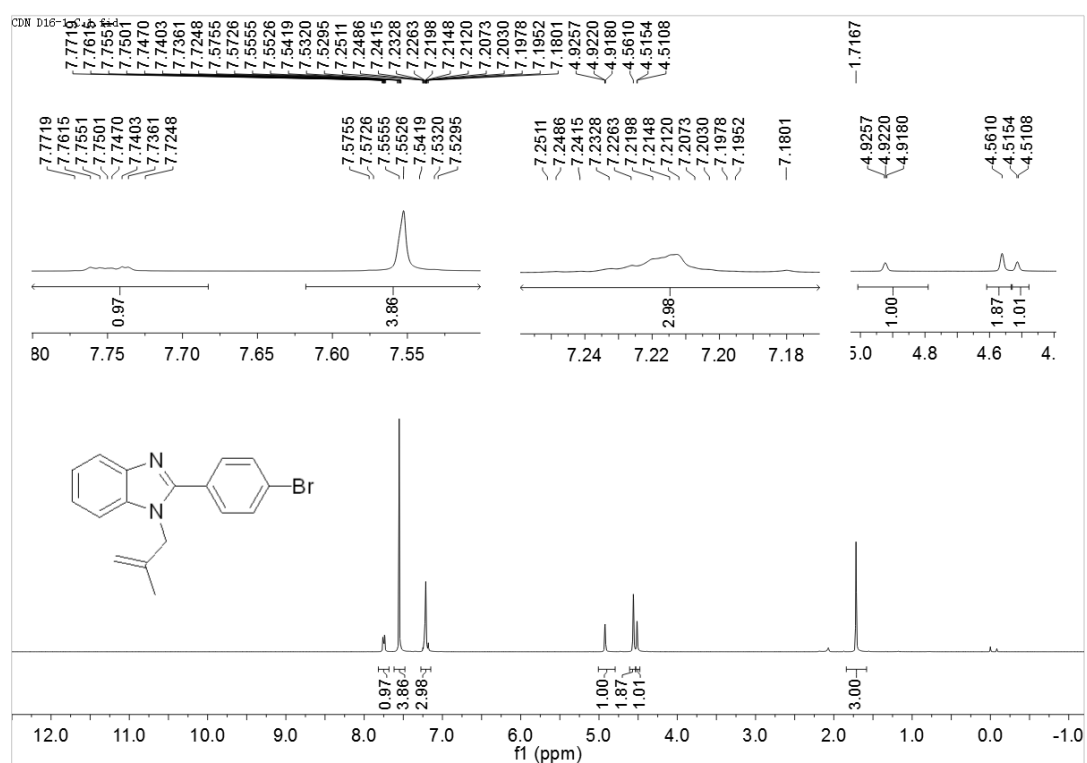

### <sup>13</sup>C NMR

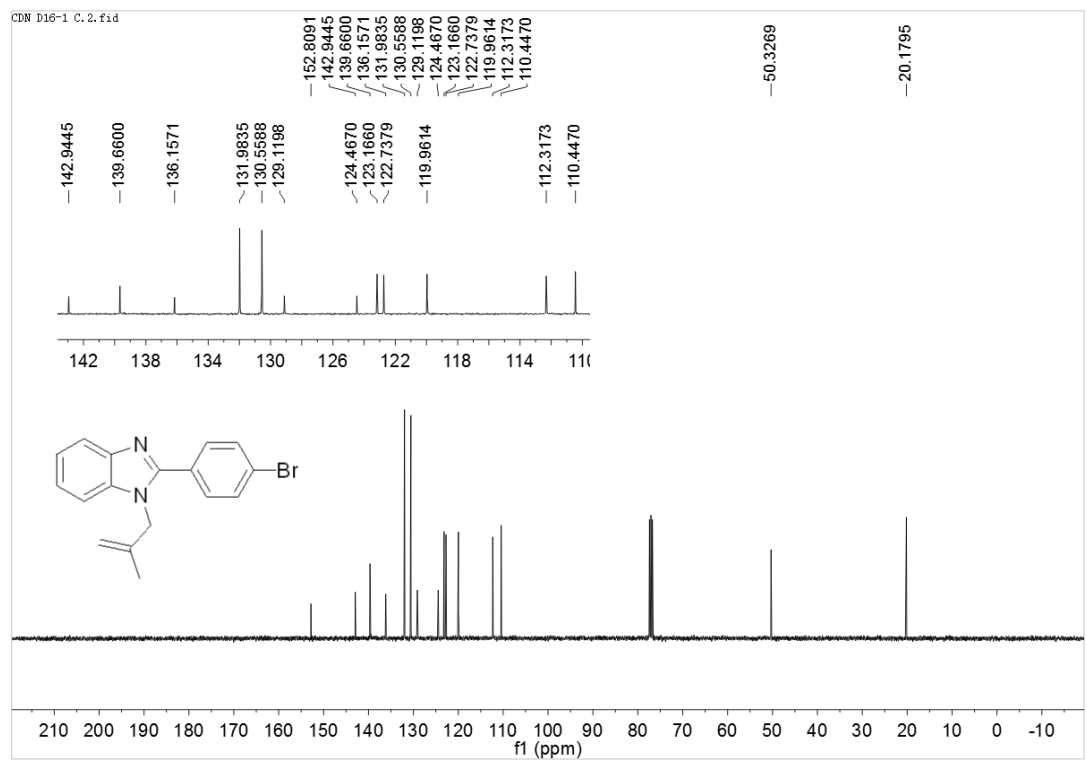



# DEPT 90 and DEPT 135

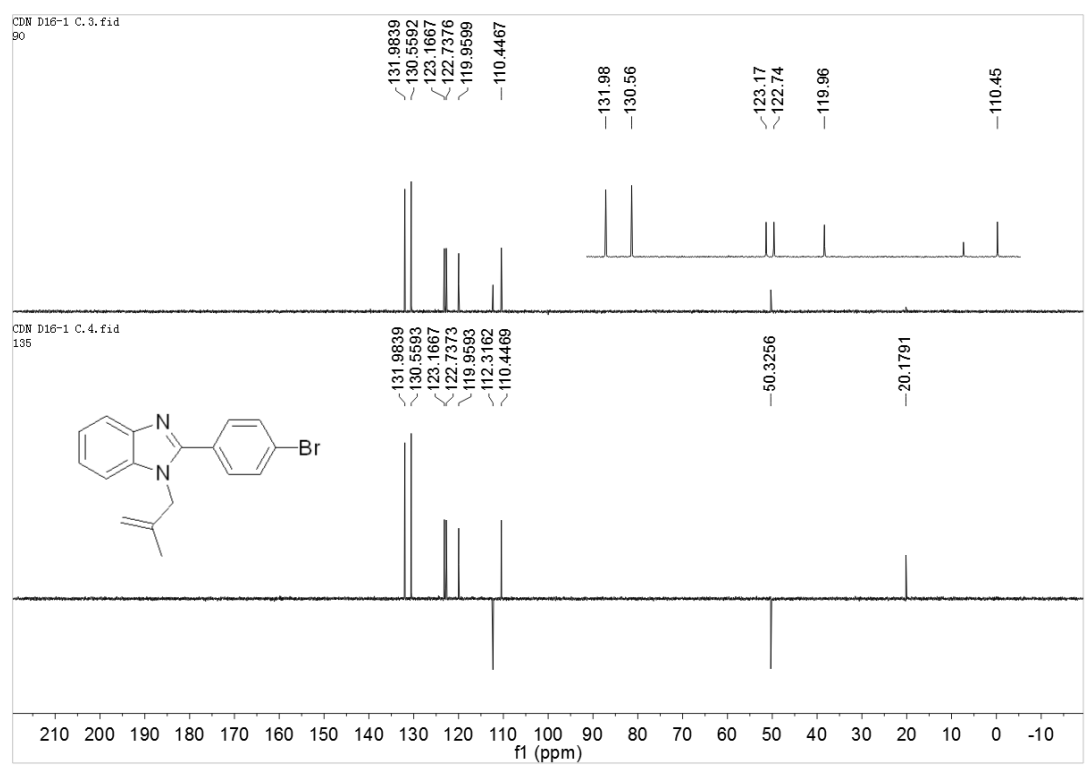

### 1c5, <sup>1</sup>H NMR

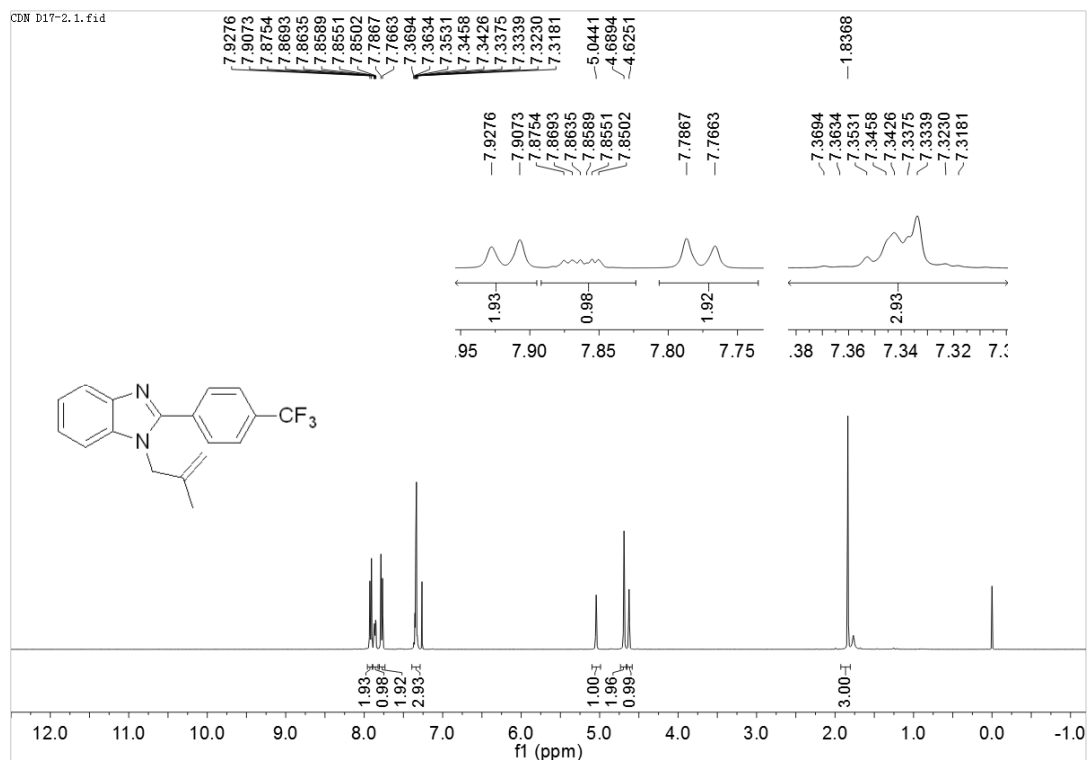

### <sup>13</sup>C NMR

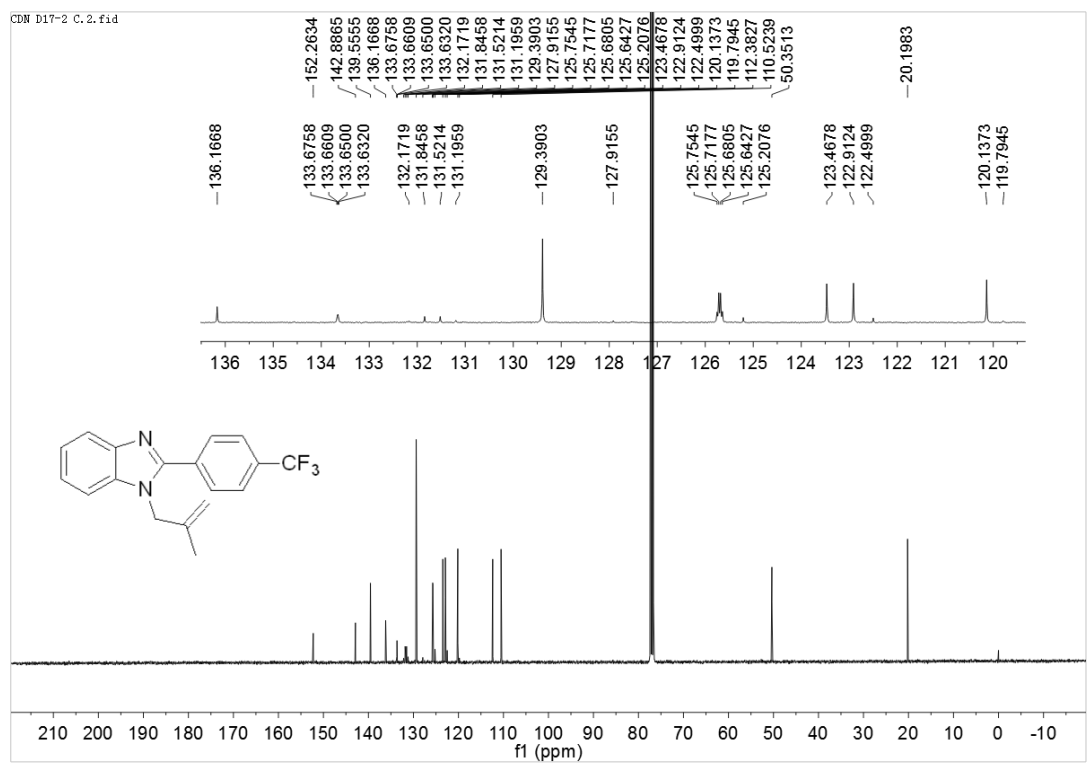

### DEPT 90 and DEPT 135

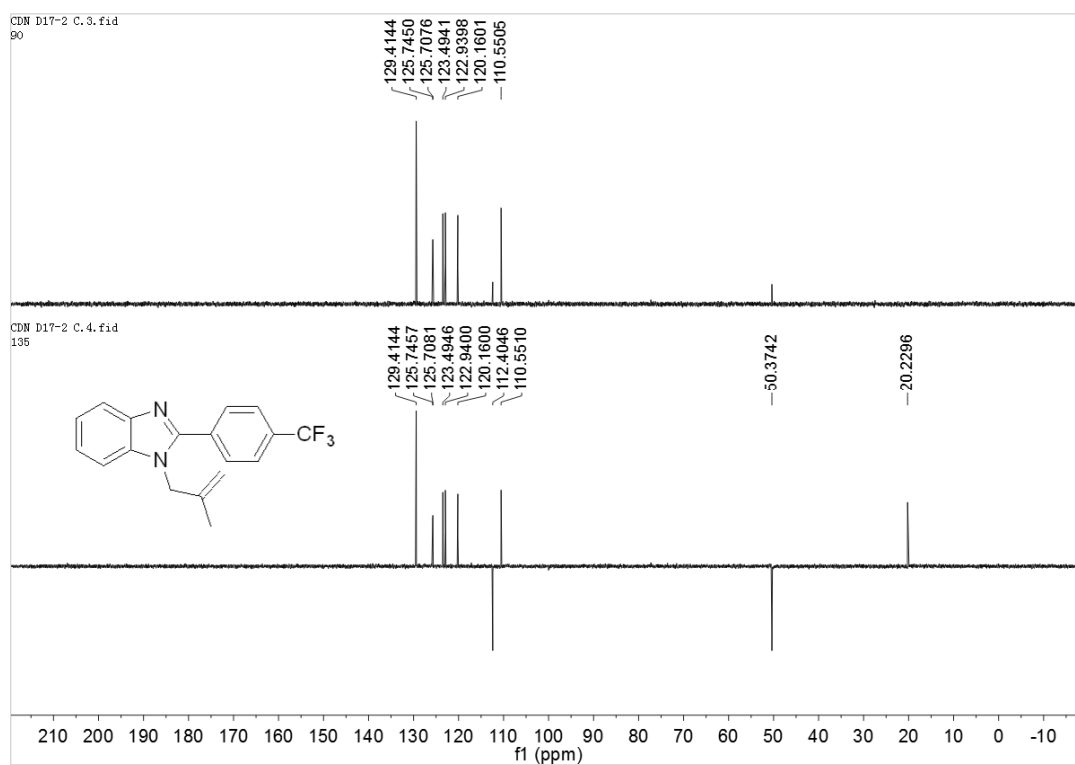

### <sup>19</sup>F NMR

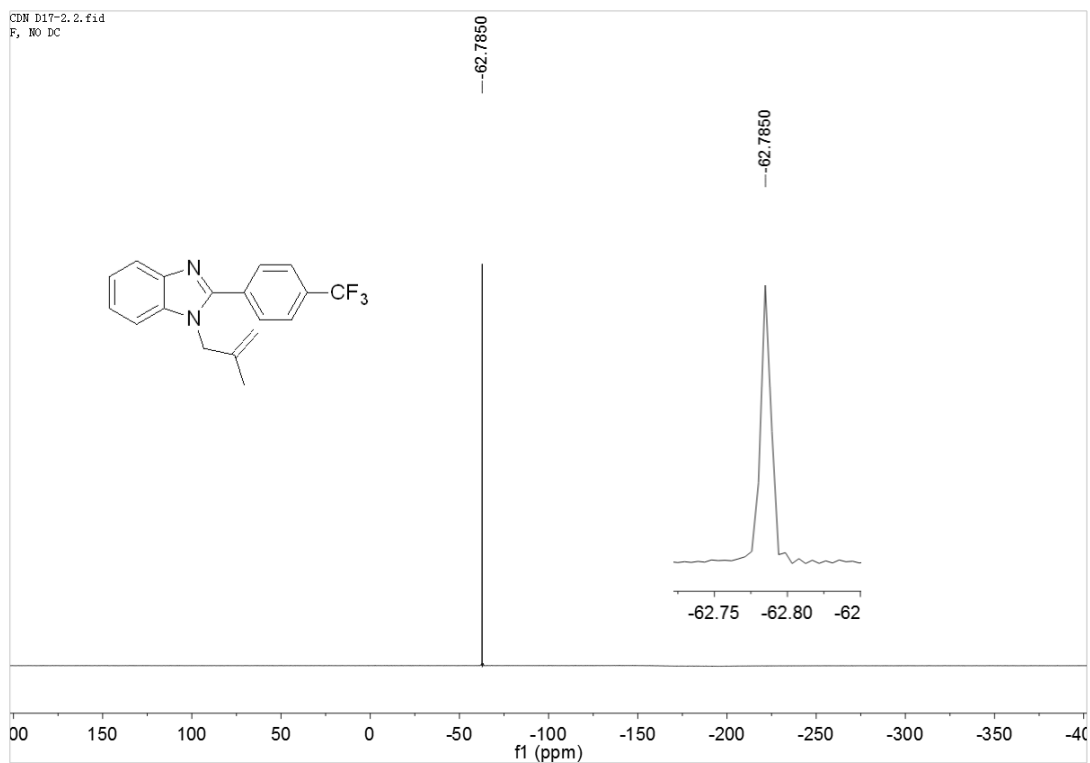

### 1c6, <sup>1</sup>H NMR

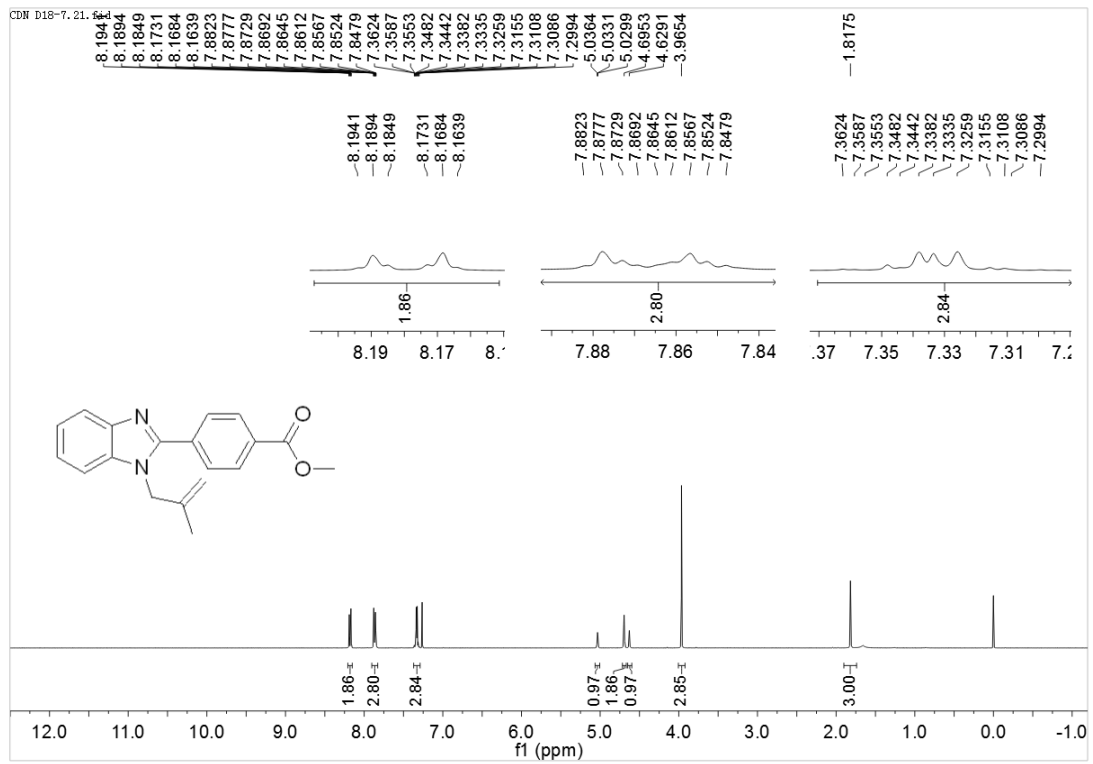

### <sup>13</sup>C NMR

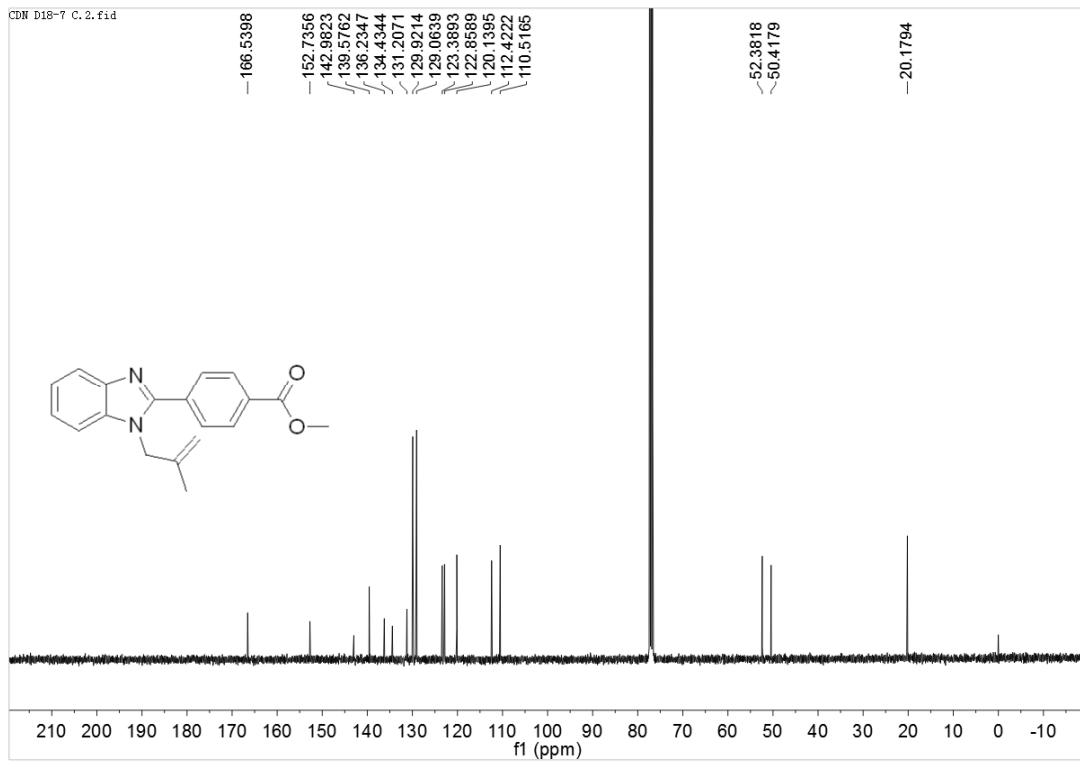

# DEPT 90 and DEPT 135

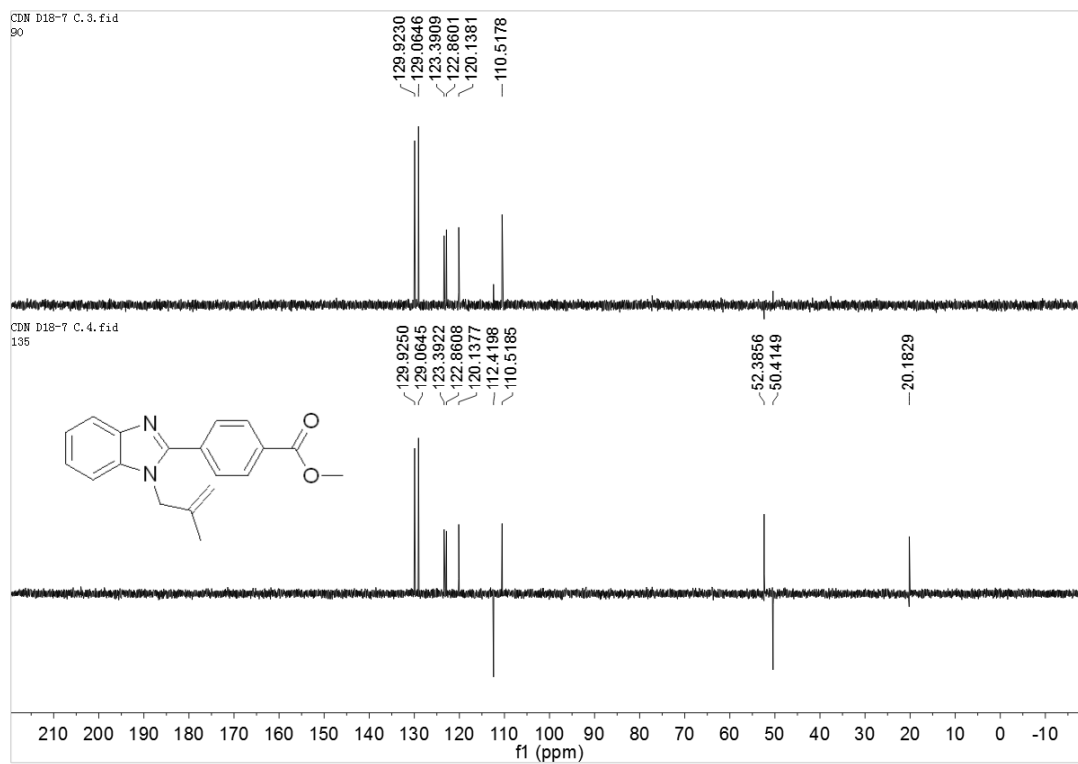

### 1d, <sup>1</sup>H NMR

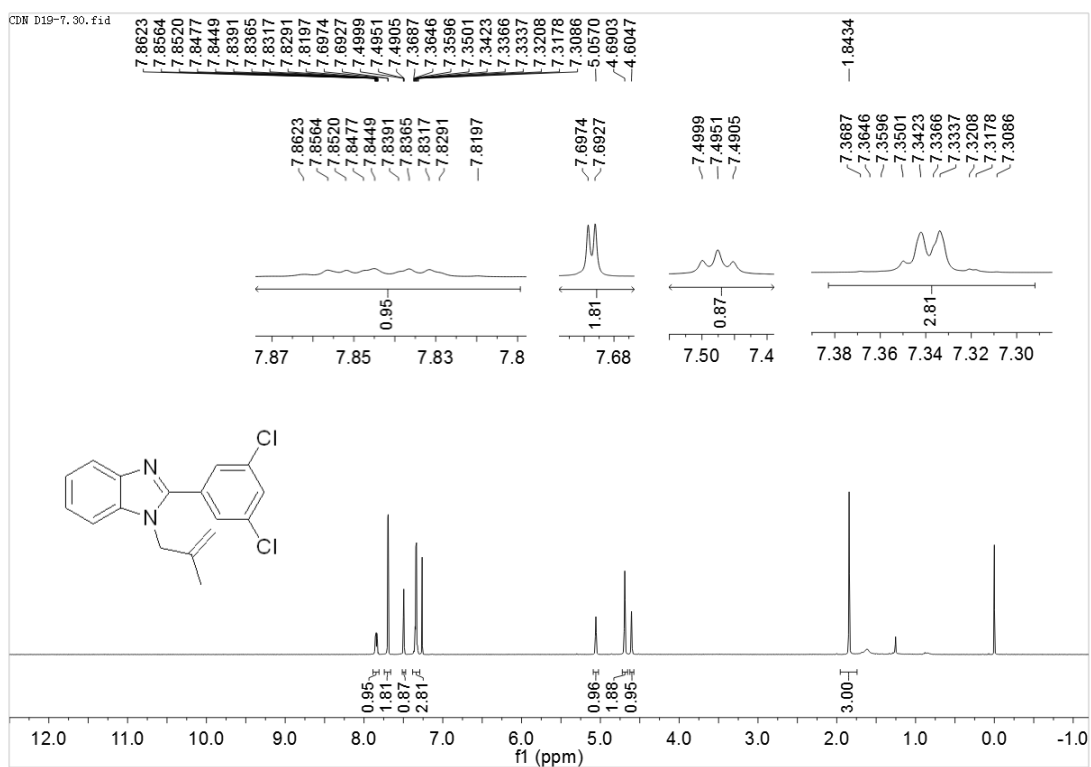

### <sup>13</sup>C NMR

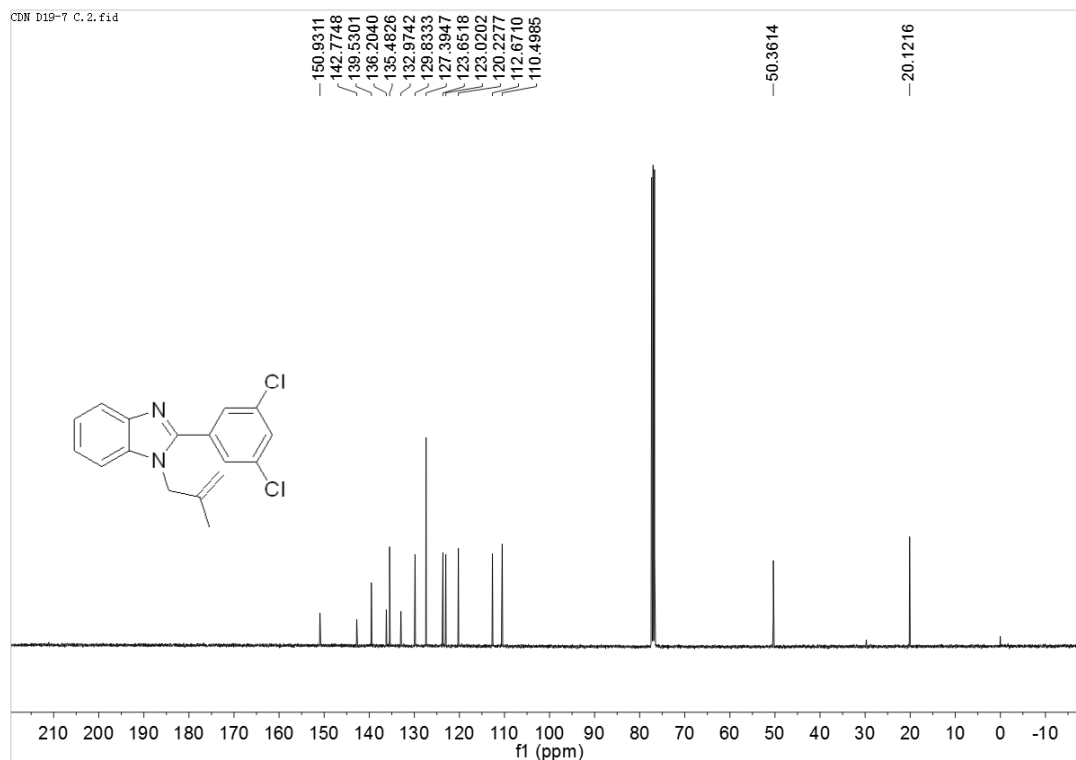

# DEPT 90 and DEPT 135

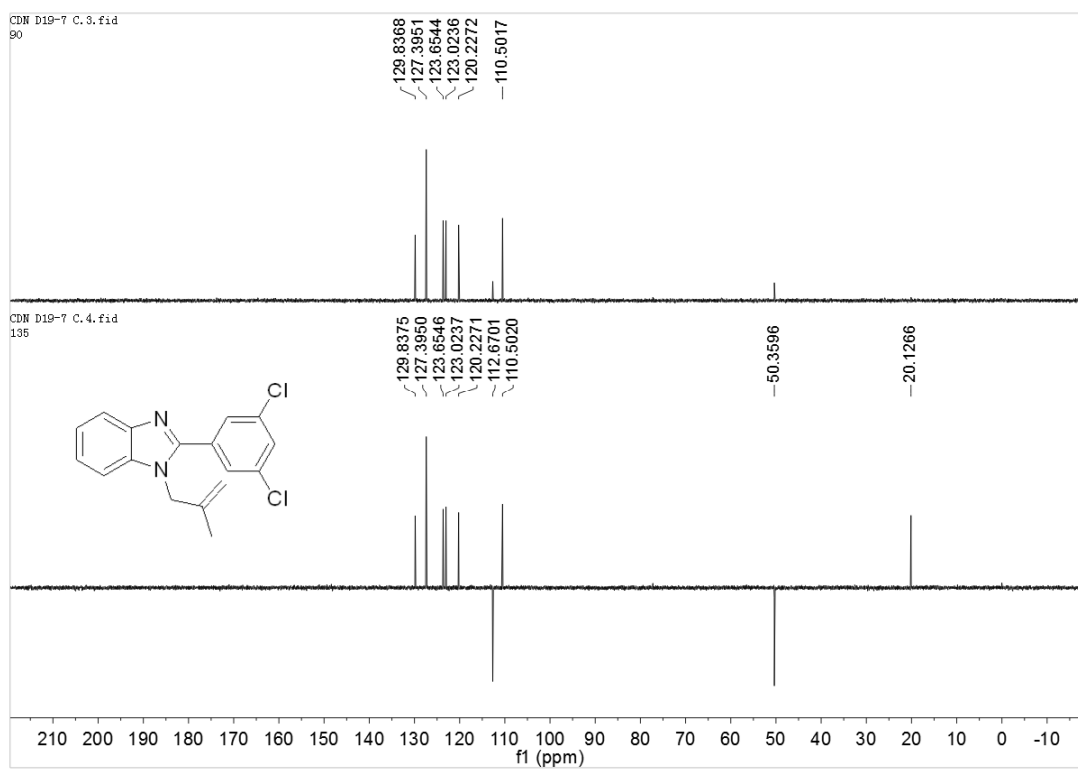





# DEPT 90 and DEPT 135

CDN D20-7 C. 3. fid  
90

132.2724  
131.2890  
129.8002  
129.8001  
126.8840  
123.0237  
122.4219  
120.2137  
110.6730

CDN D20-7 C. 4. fid  
135

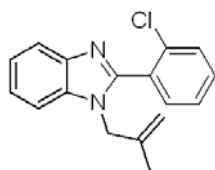

132.2724  
131.2894  
129.8002  
126.8842  
123.0236  
122.4224  
120.2136  
113.1607  
110.6732

50.4019

19.8656

210 200 190 180 170 160 150 140 130 120 110 100 90 80 70 60 50 40 30 20 10 0 -10  
f1 (ppm)

**1f, <sup>1</sup>H NMR**

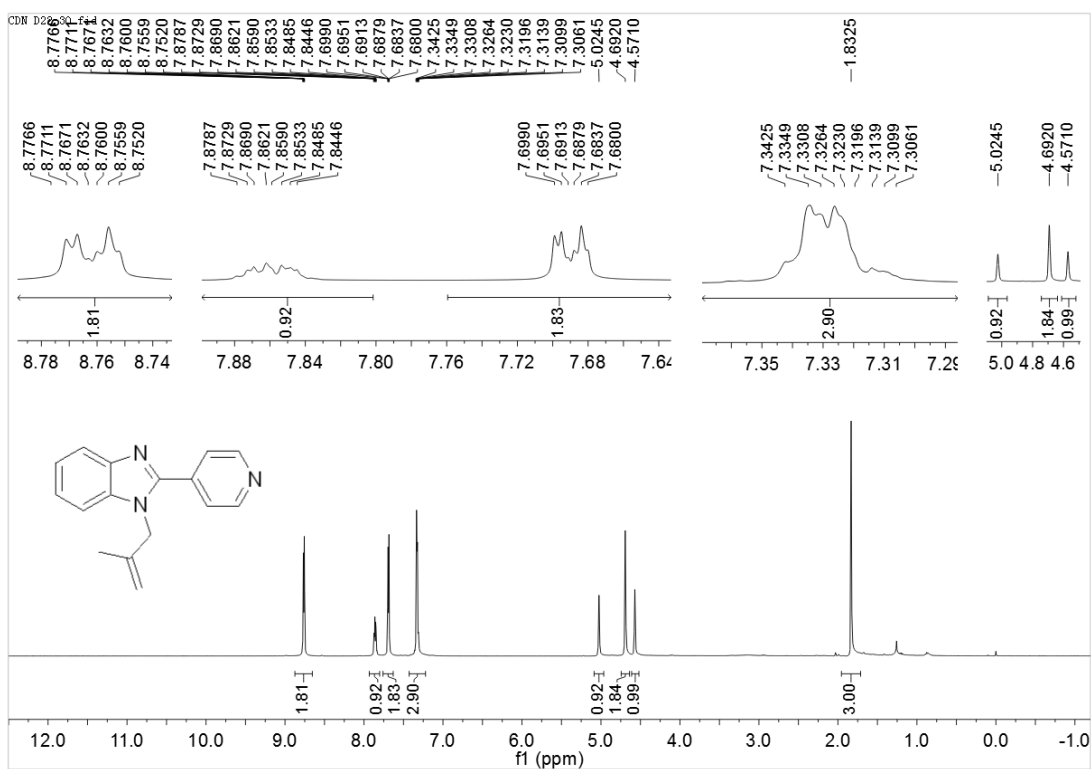

**<sup>13</sup>C NMR**

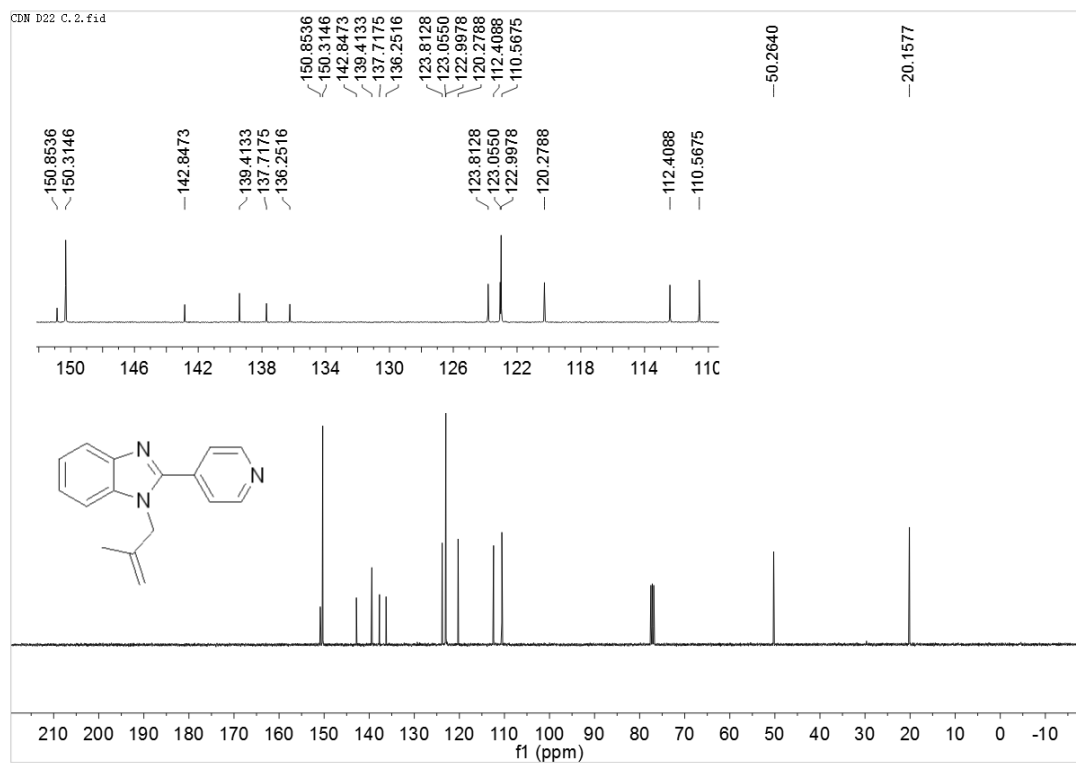

# DEPT 90 and DEPT 135

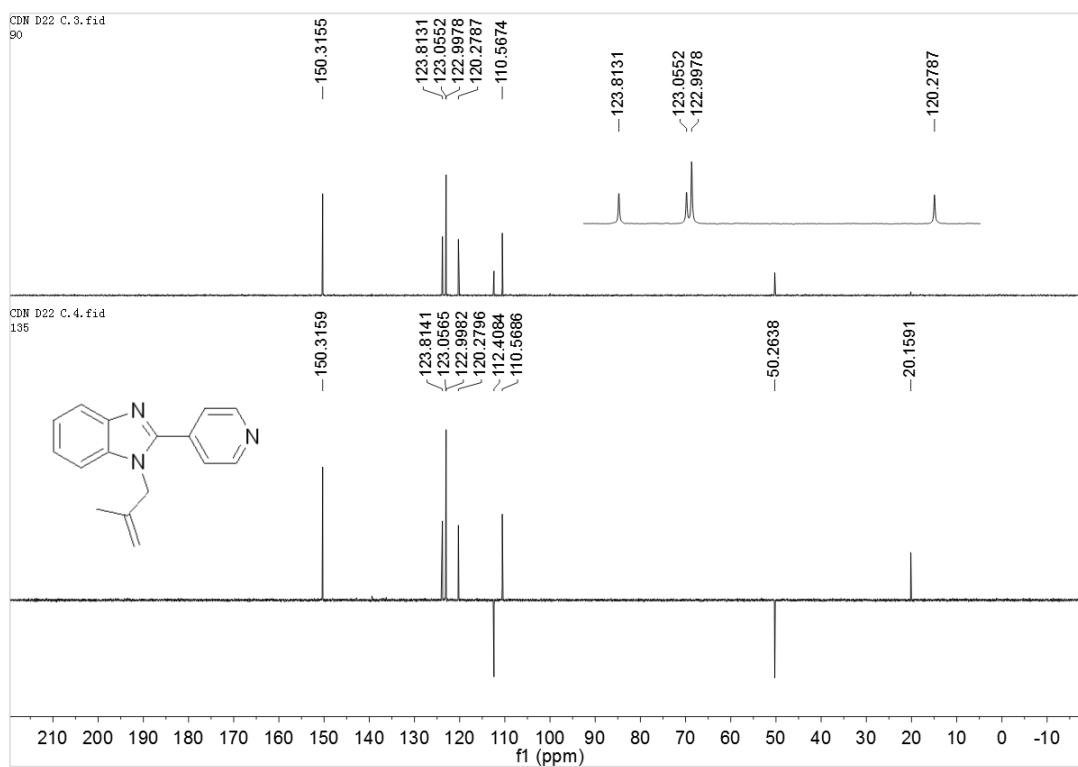

1g, <sup>1</sup>H NMR

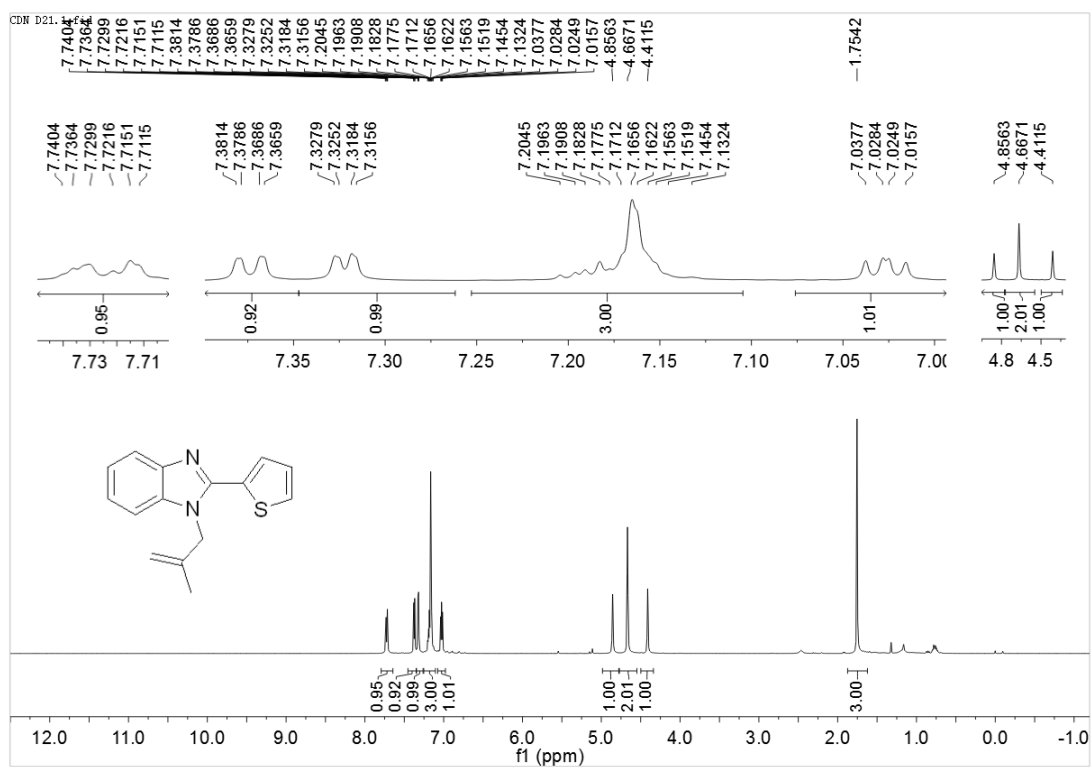

<sup>13</sup>C NMR

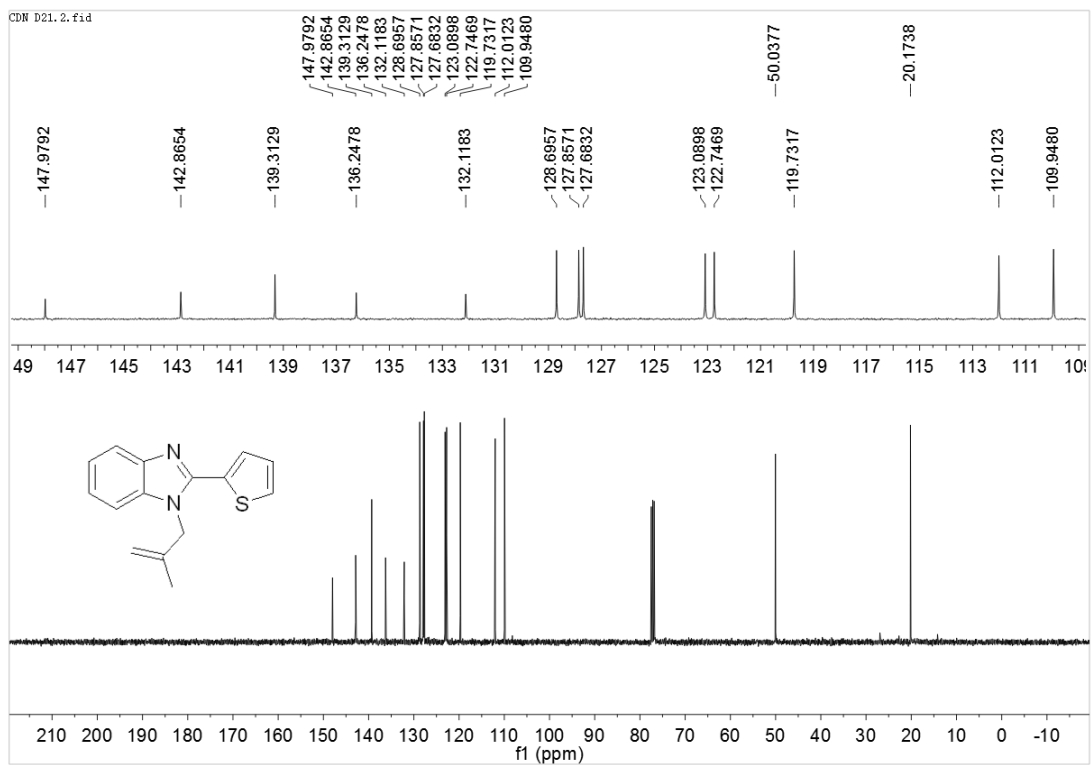

# DEPT 90 and DEPT 135

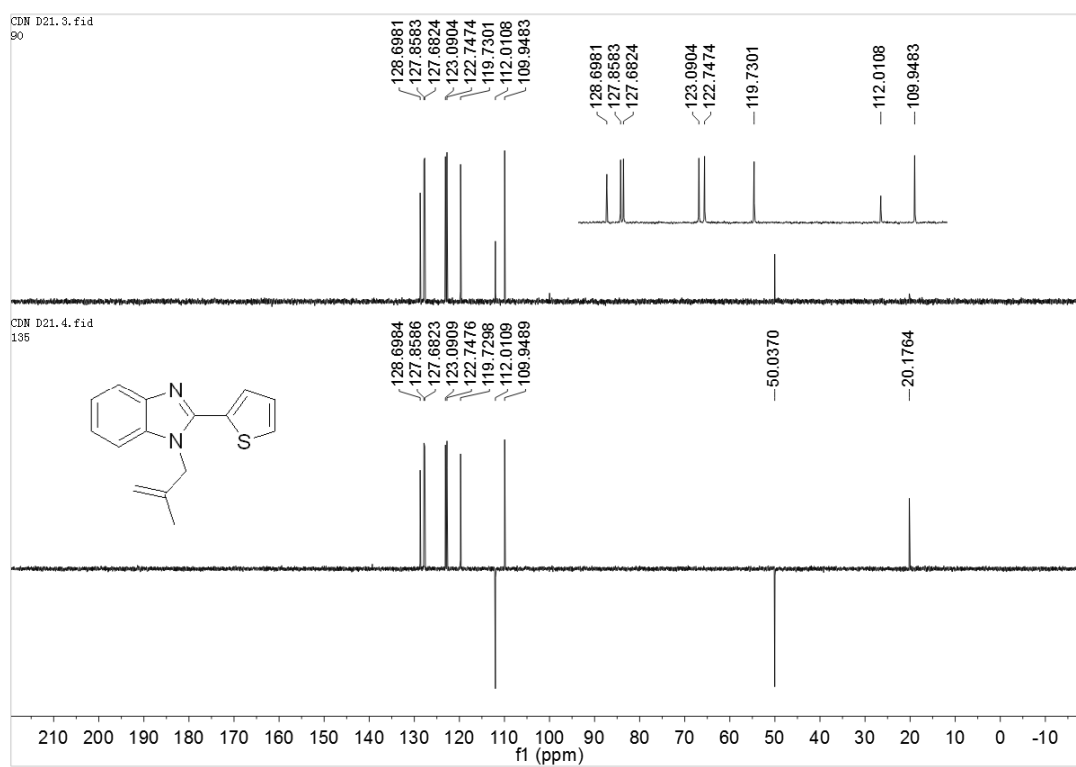

# 1h1, <sup>1</sup>H NMR

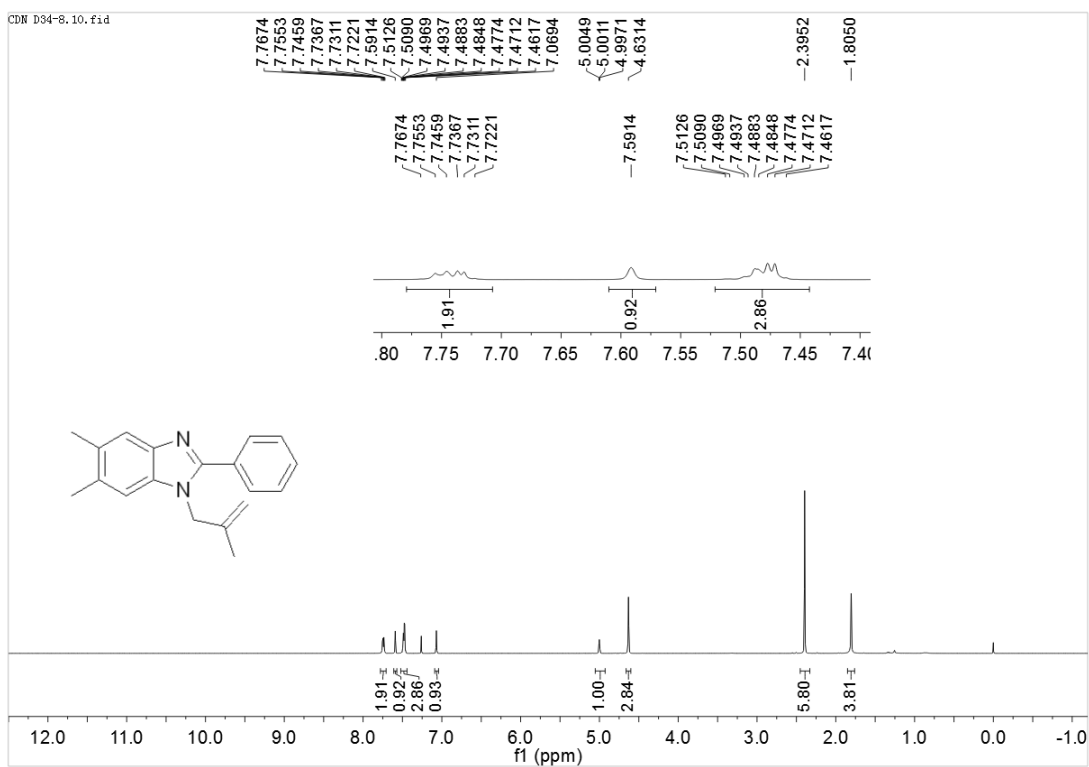

# <sup>13</sup>C NMR

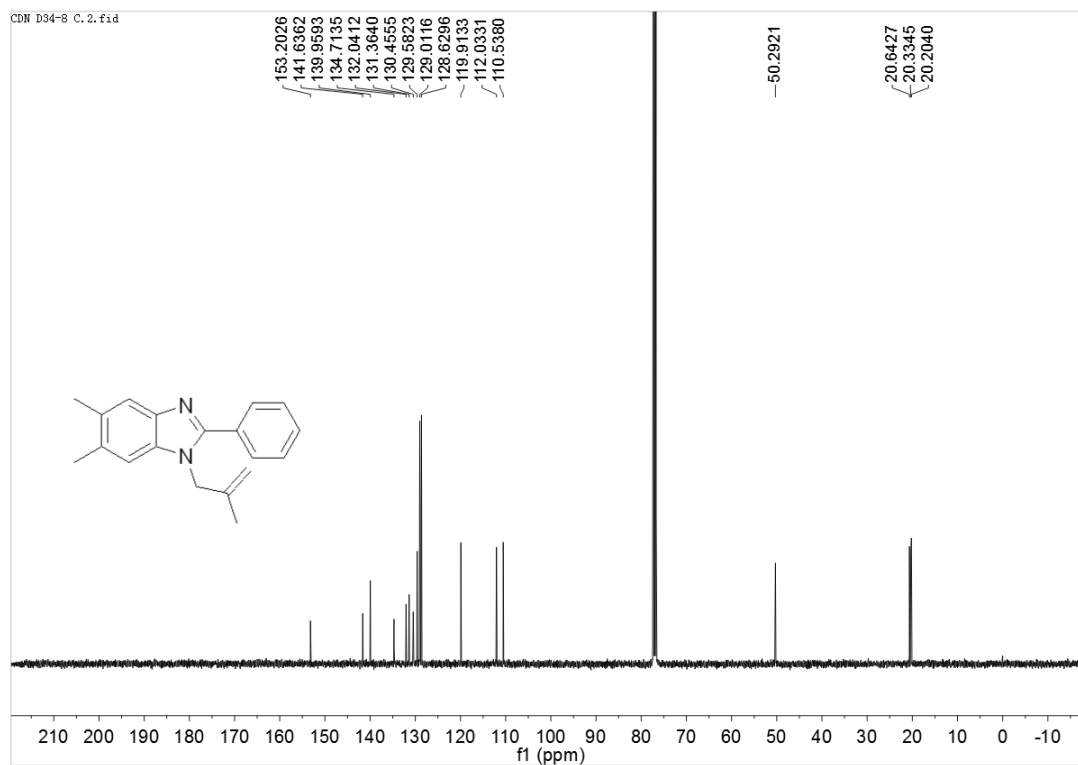

# DEPT 90 and DEPT 135

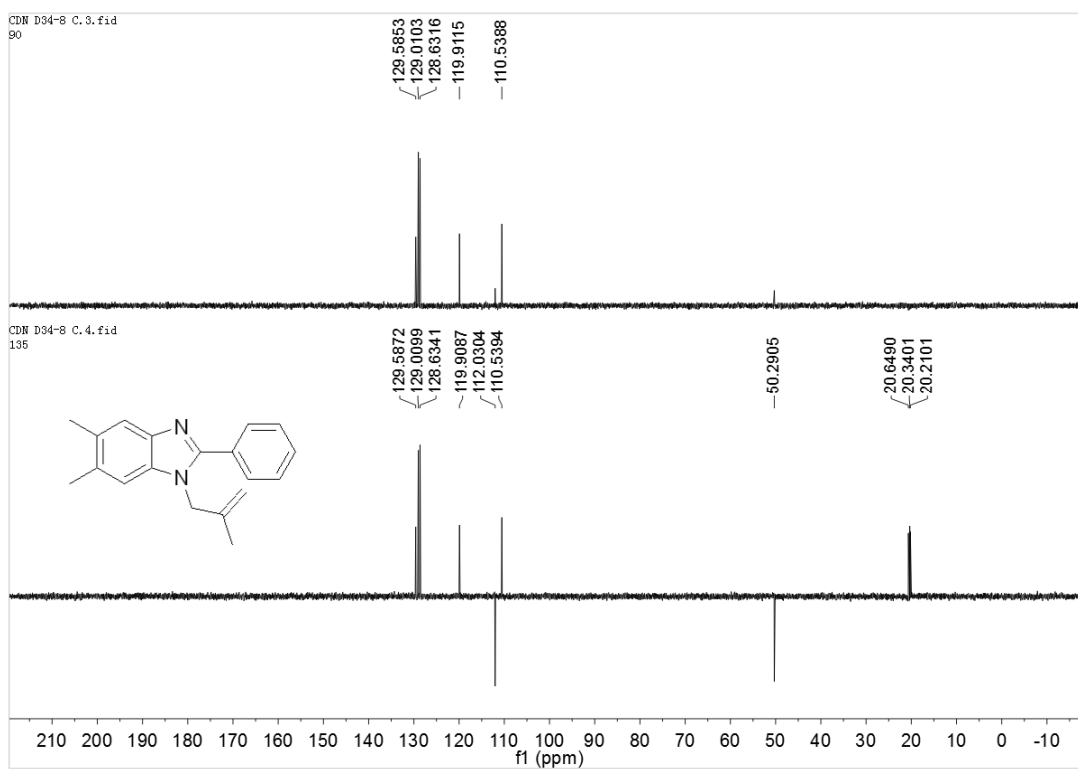

## 1h2, <sup>1</sup>H NMR

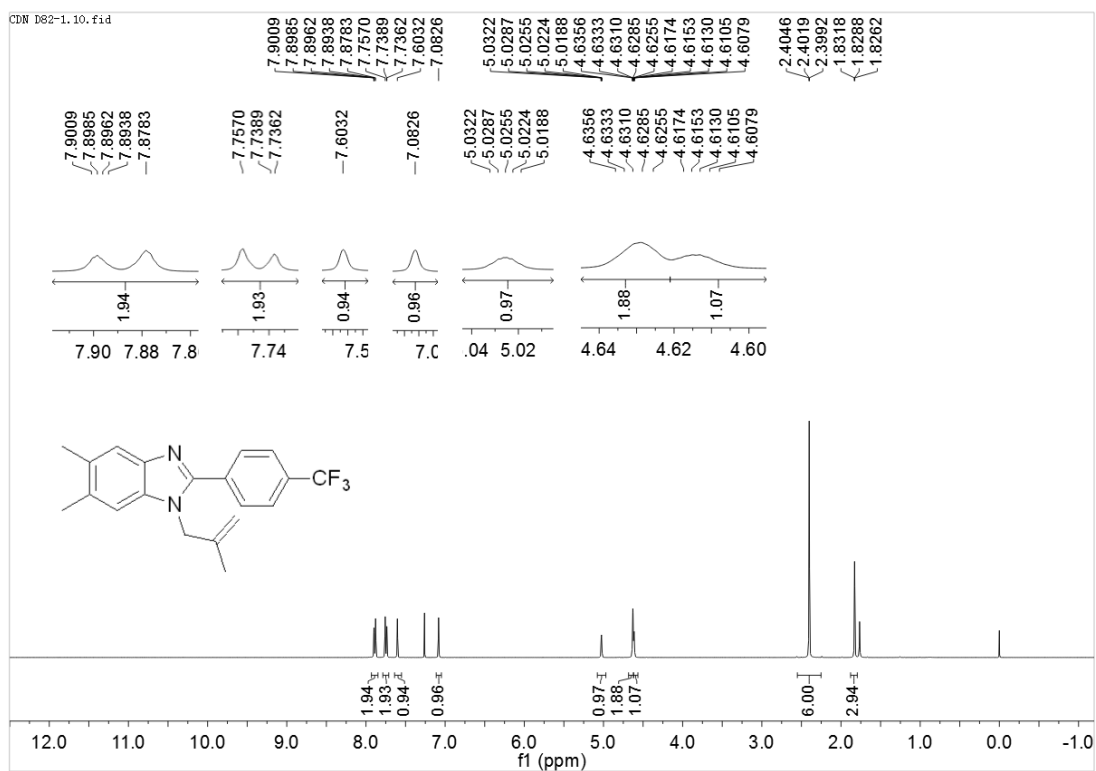

## <sup>13</sup>C NMR

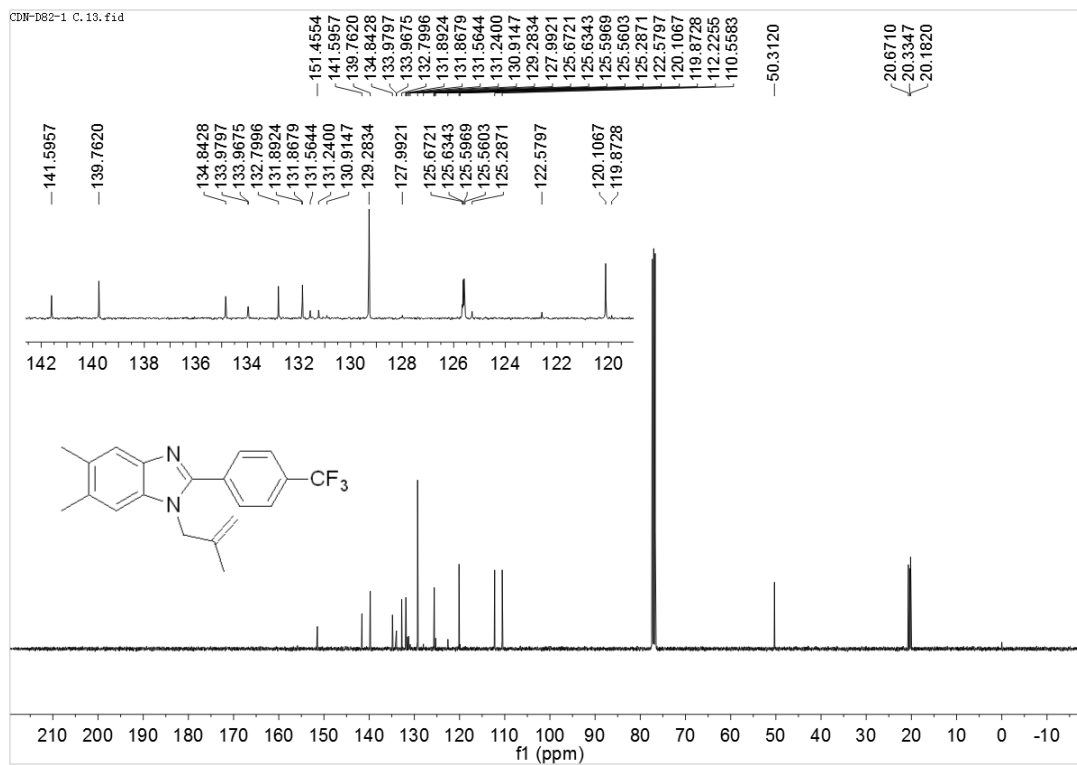



# DEPT 90 and DEPT 135

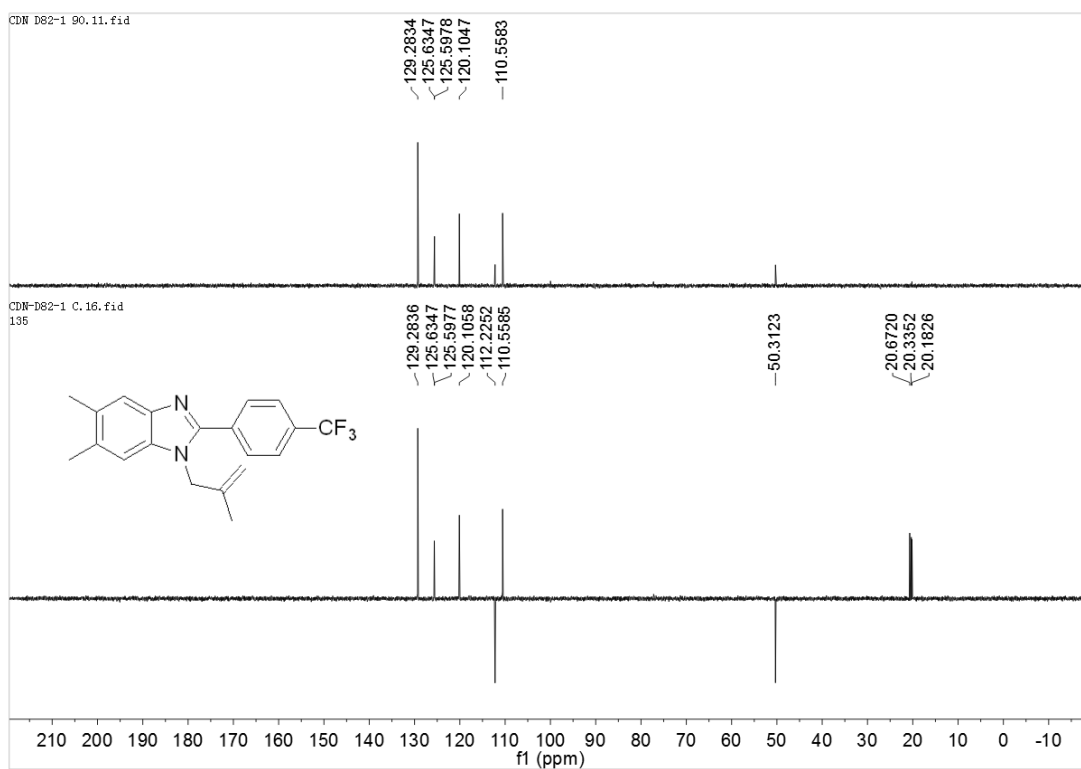

# <sup>19</sup>F NMR

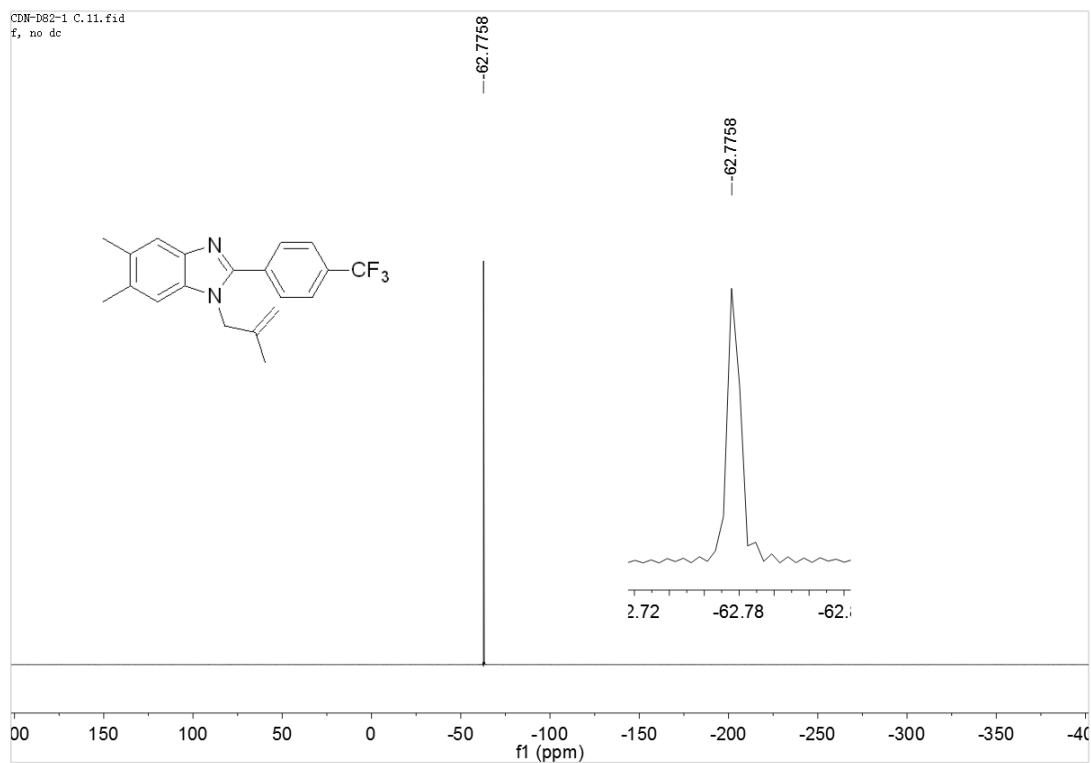

### i, <sup>1</sup>H NMR

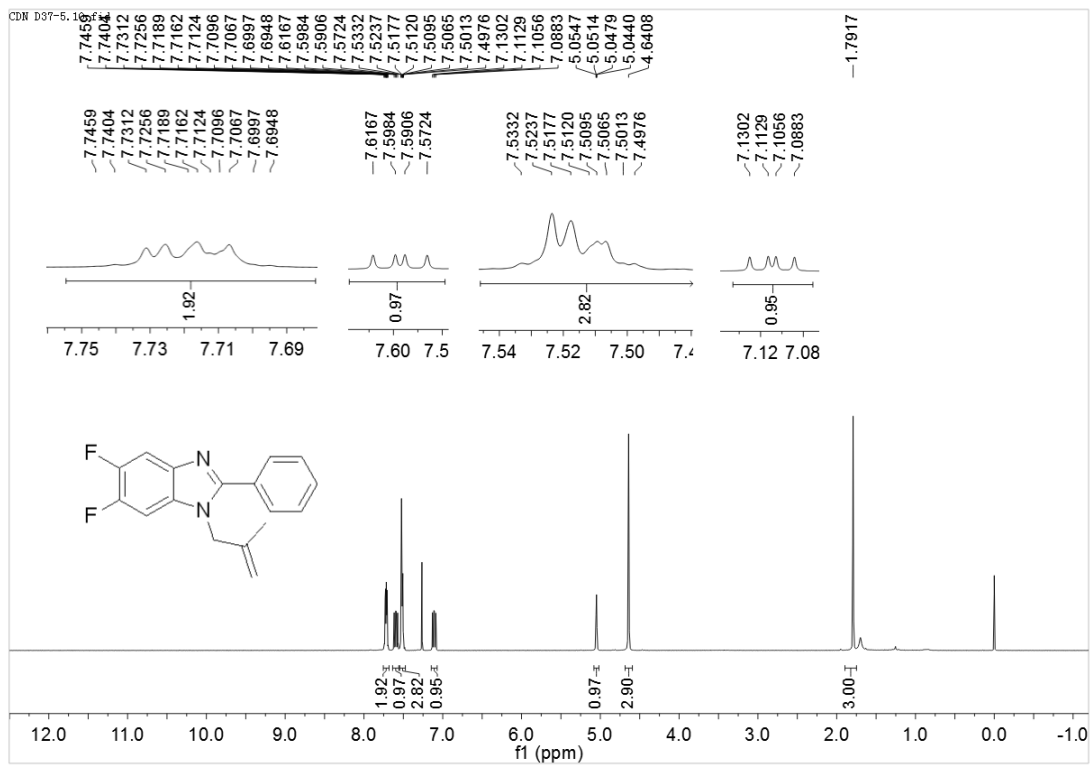

### <sup>13</sup>C NMR

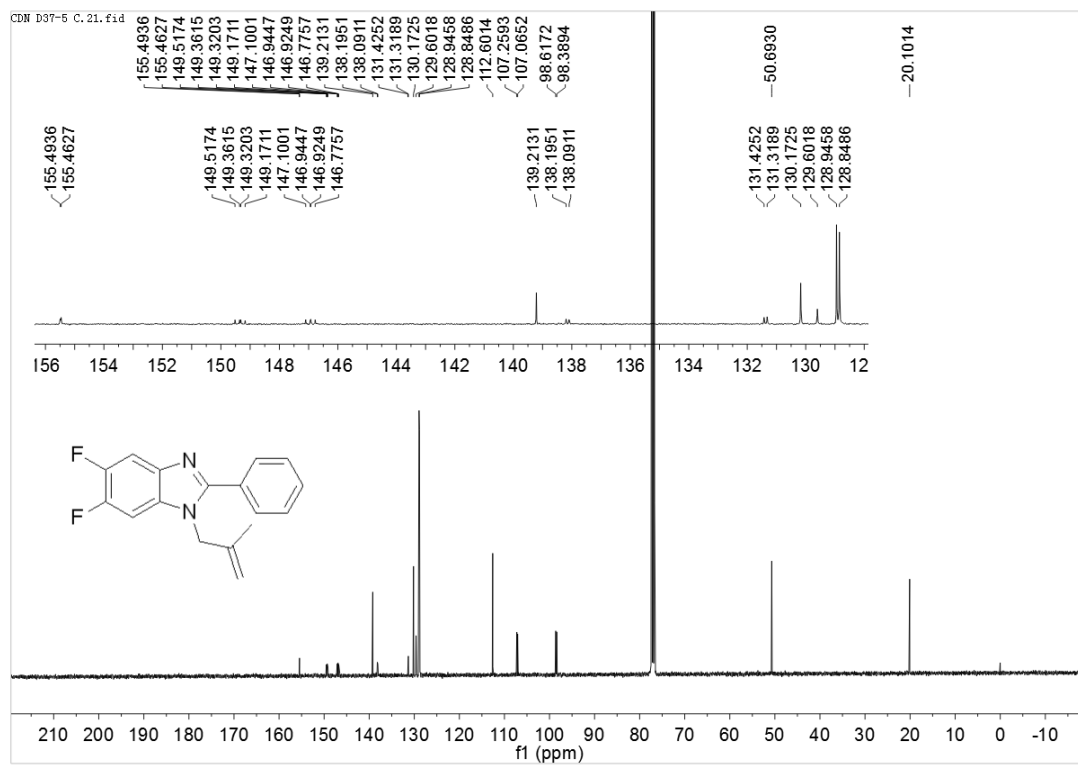

### DEPT 90 and DEPT 135

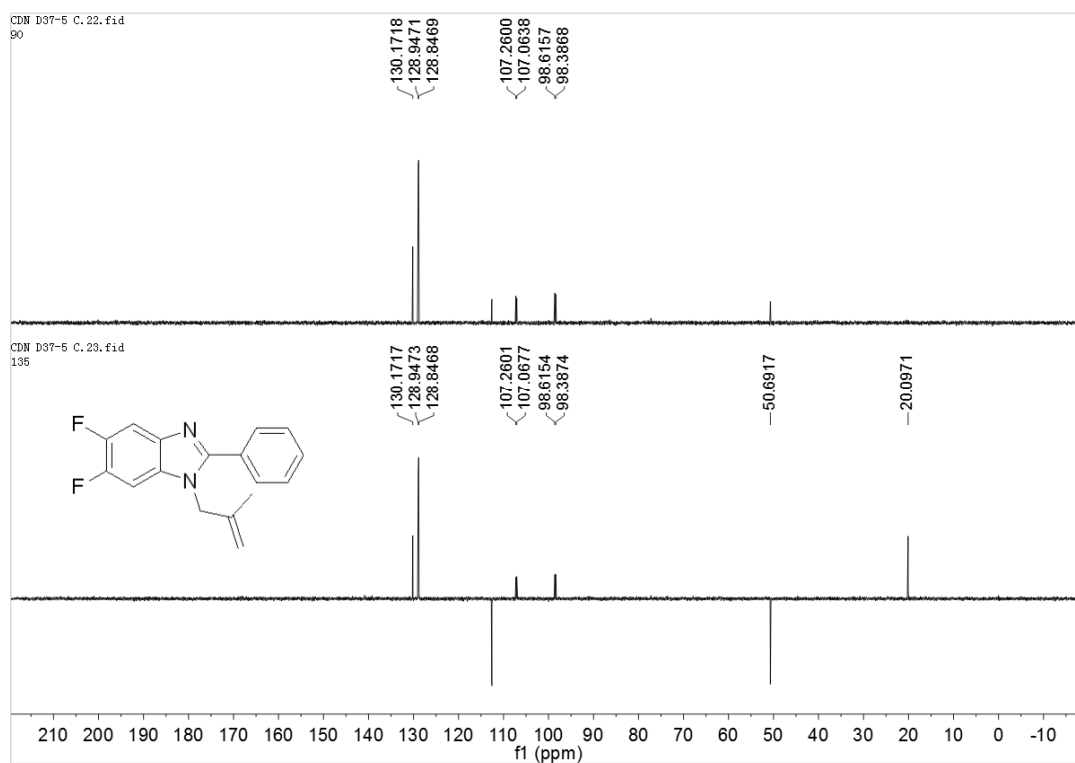

### <sup>19</sup>F NMR

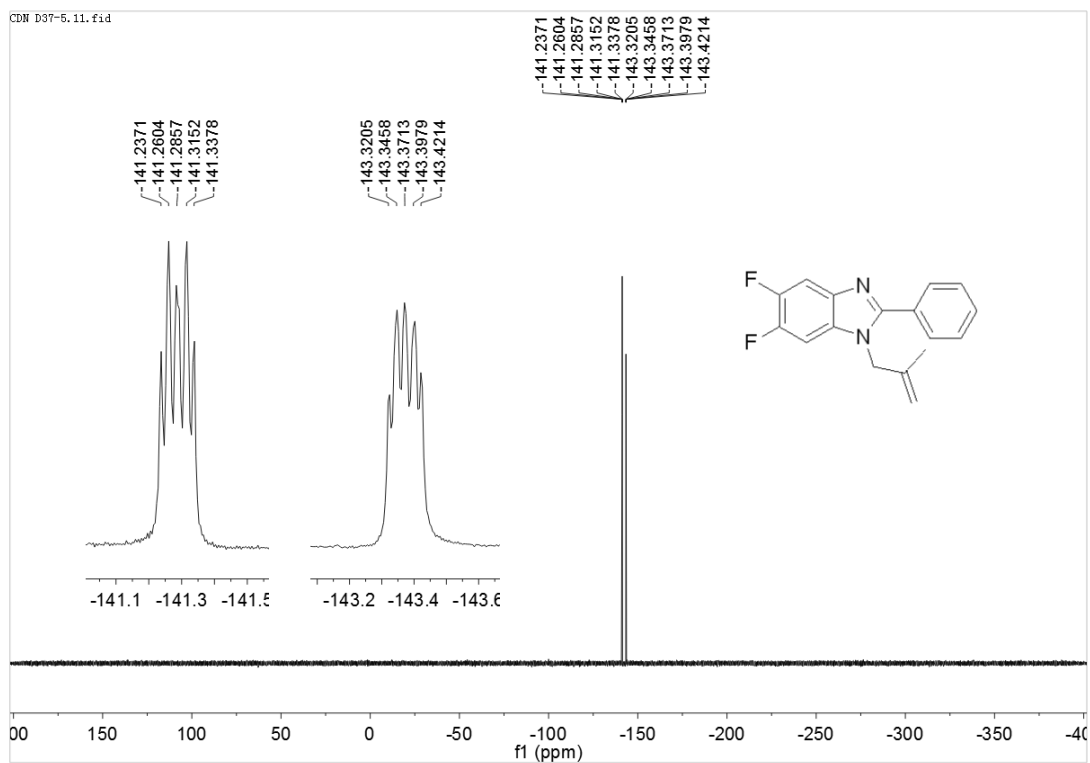

# 1j1, <sup>1</sup>H NMR

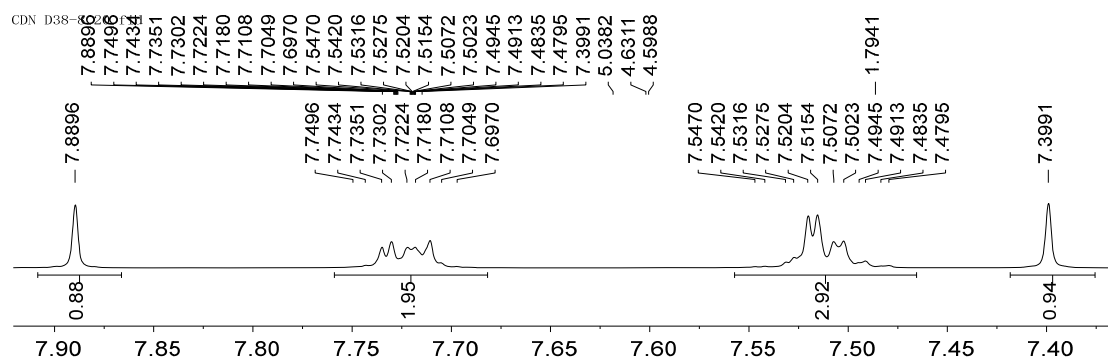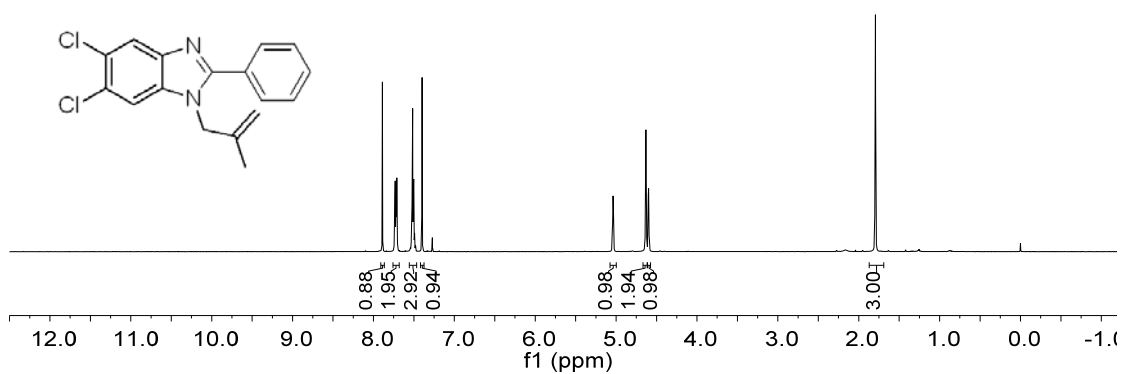

# <sup>13</sup>C NMR

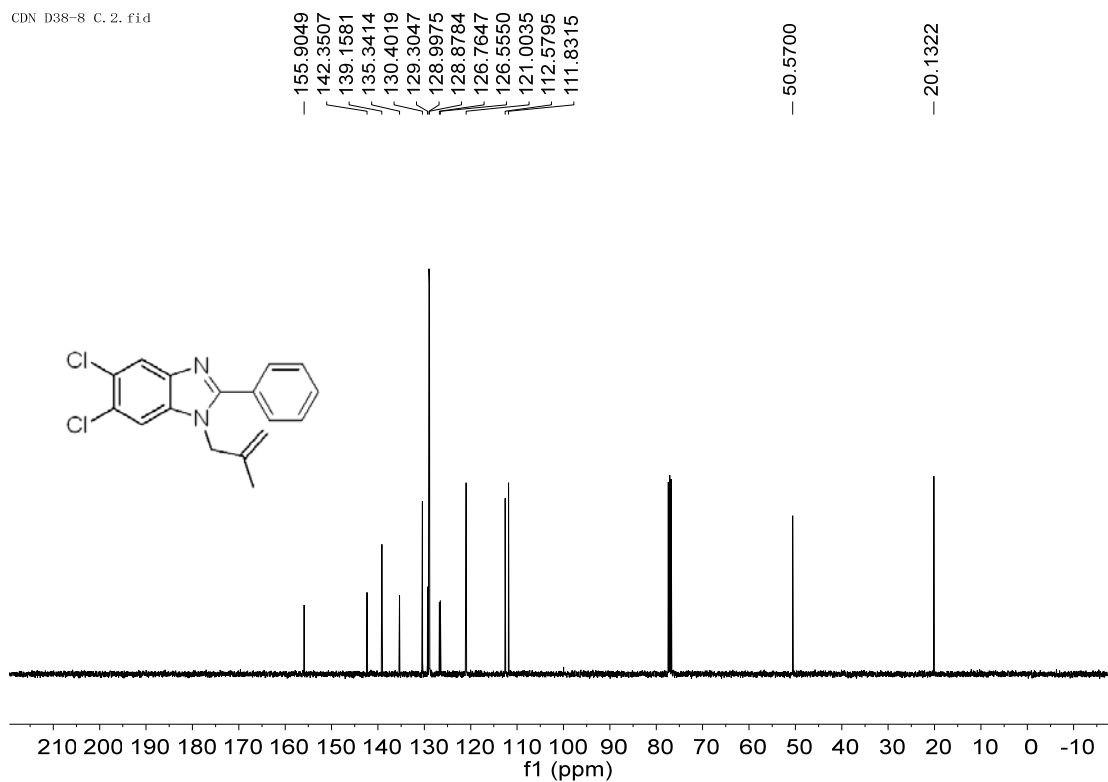

DEPT 90 and DEPT 135

CDN D38-8 C. 3. fid  
90

130.4043  
128.9967  
128.8801  
121.0023  
111.8324

CDN D38-8 C. 4. fid  
135

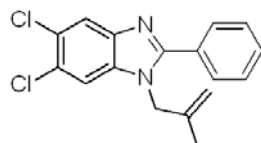

130.4049  
128.9962  
128.8804  
121.0016  
112.5776  
111.8327

- 50.5687

- 20.1363

210 200 190 180 170 160 150 140 130 120 110 100 90 80 70 60 50 40 30 20 10 0 -10  
f1 (ppm)

# 1j2, <sup>1</sup>H NMR

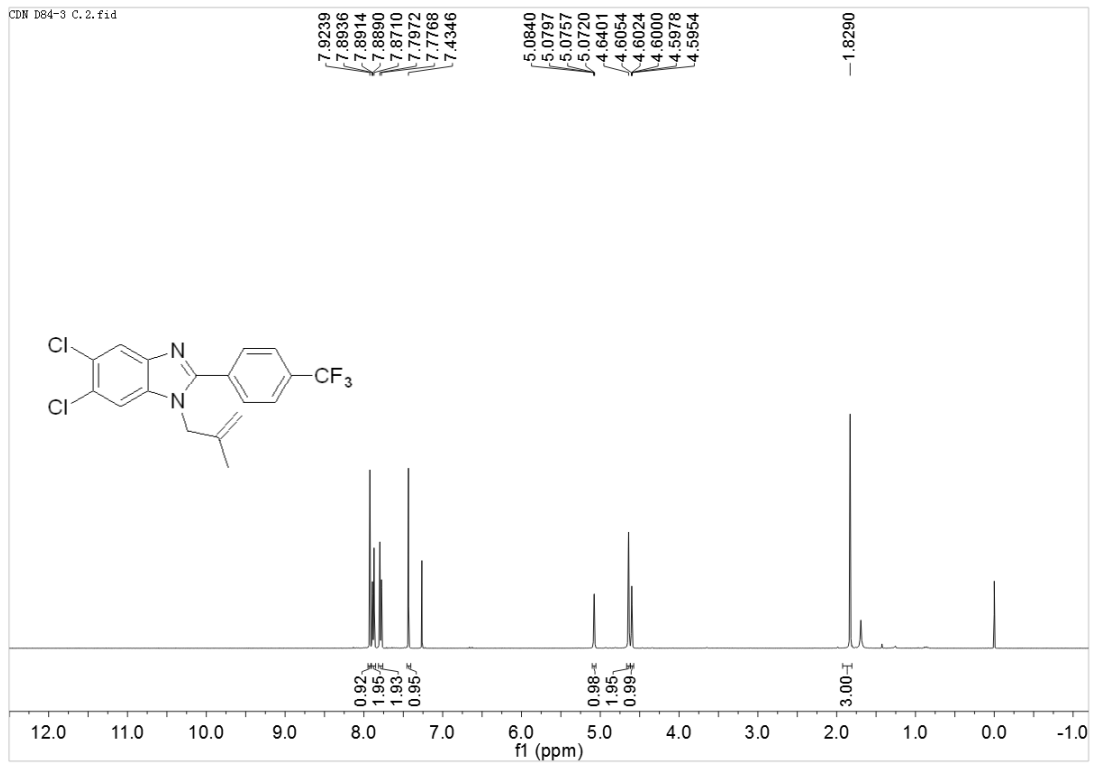

# <sup>13</sup>C NMR

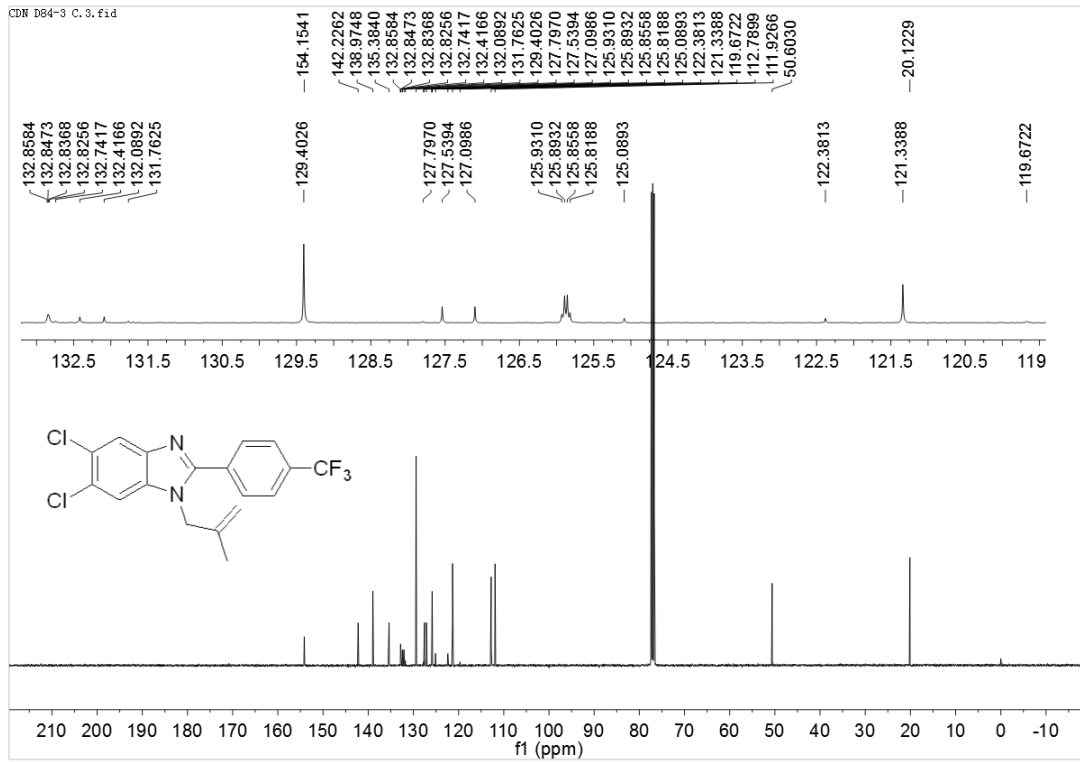

### DEPT 90 and DEPT 135

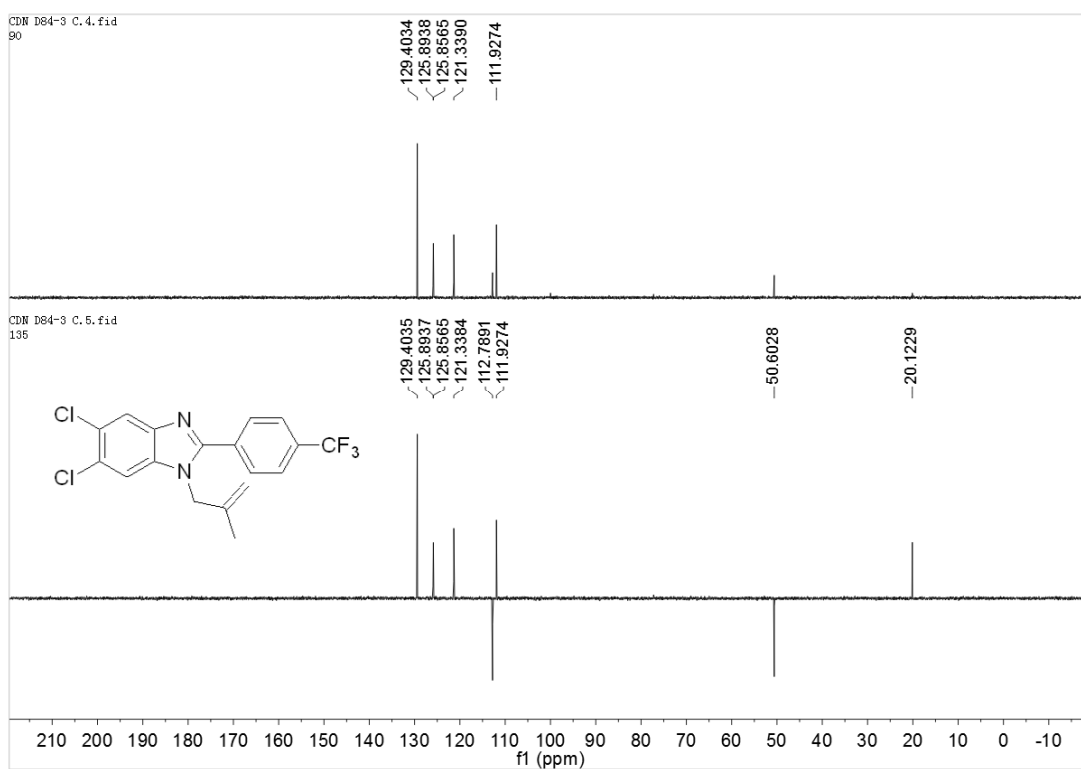

### <sup>19</sup>F NMR

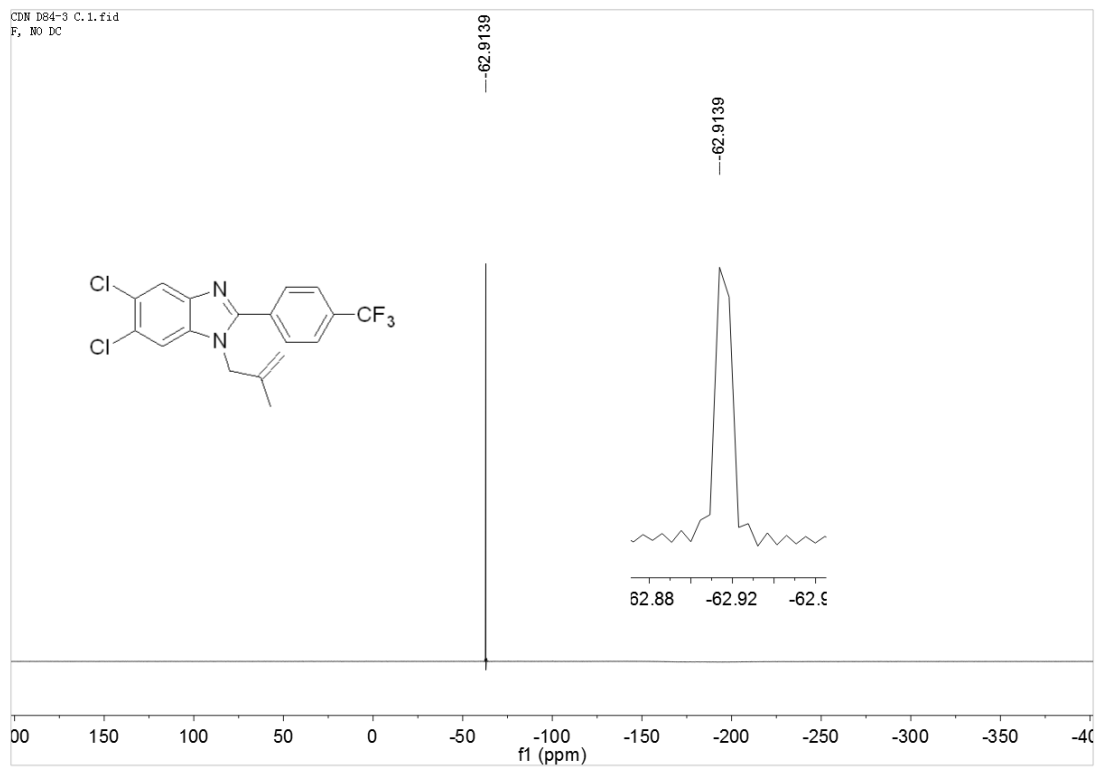

# 1k, <sup>1</sup>H NMR

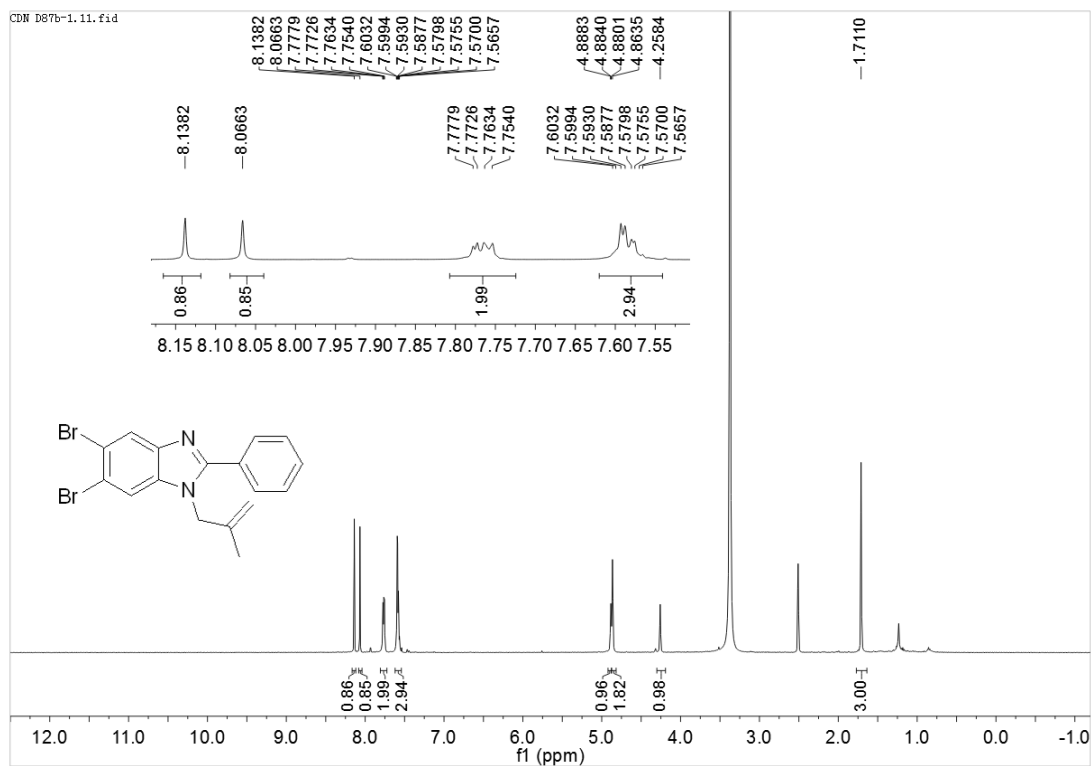

# <sup>13</sup>C NMR

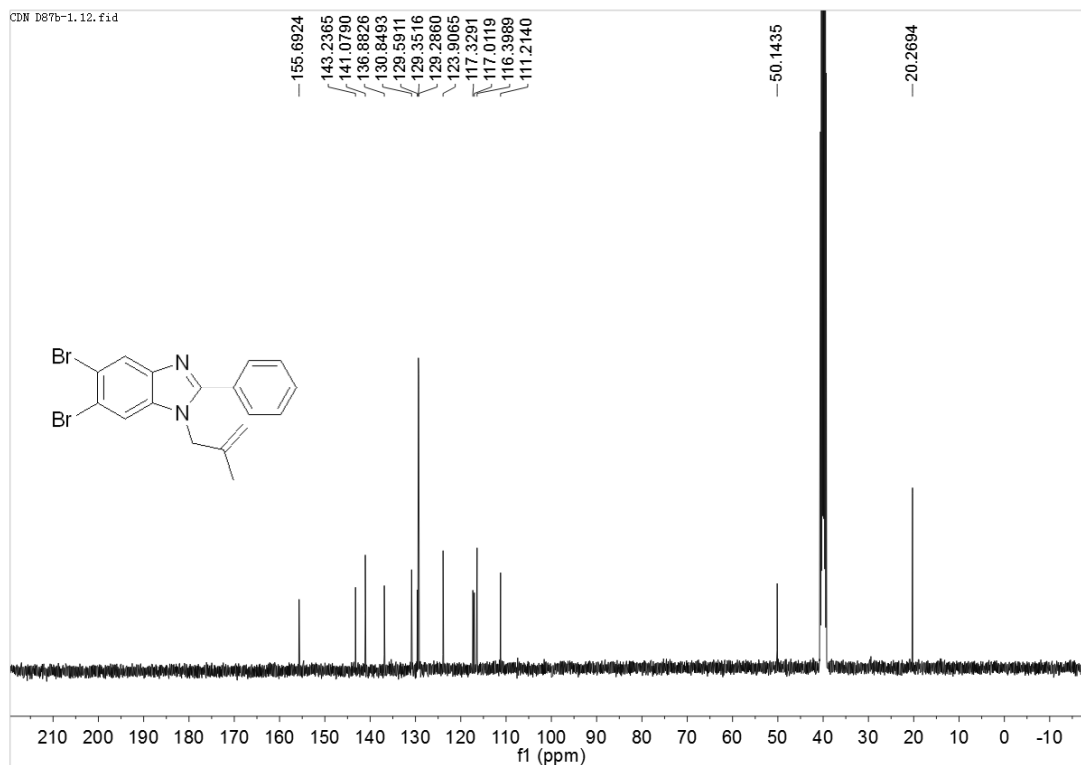



# DEPT 90 and DEPT 135

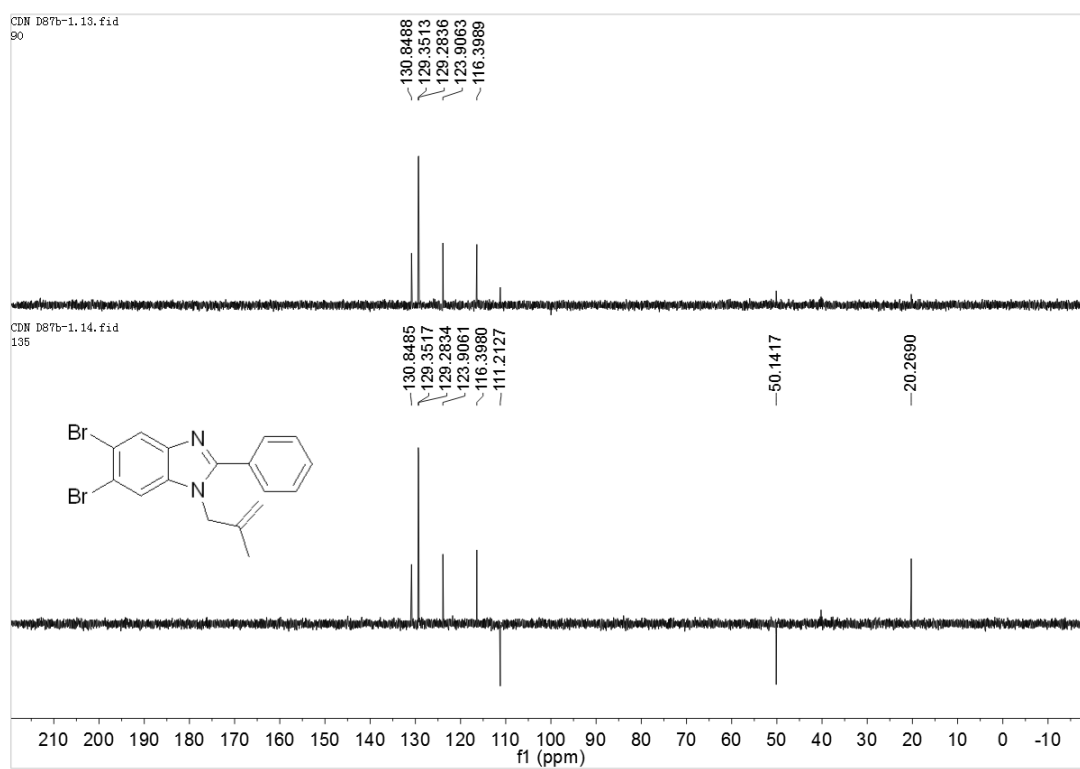

# 1m, <sup>1</sup>H NMR

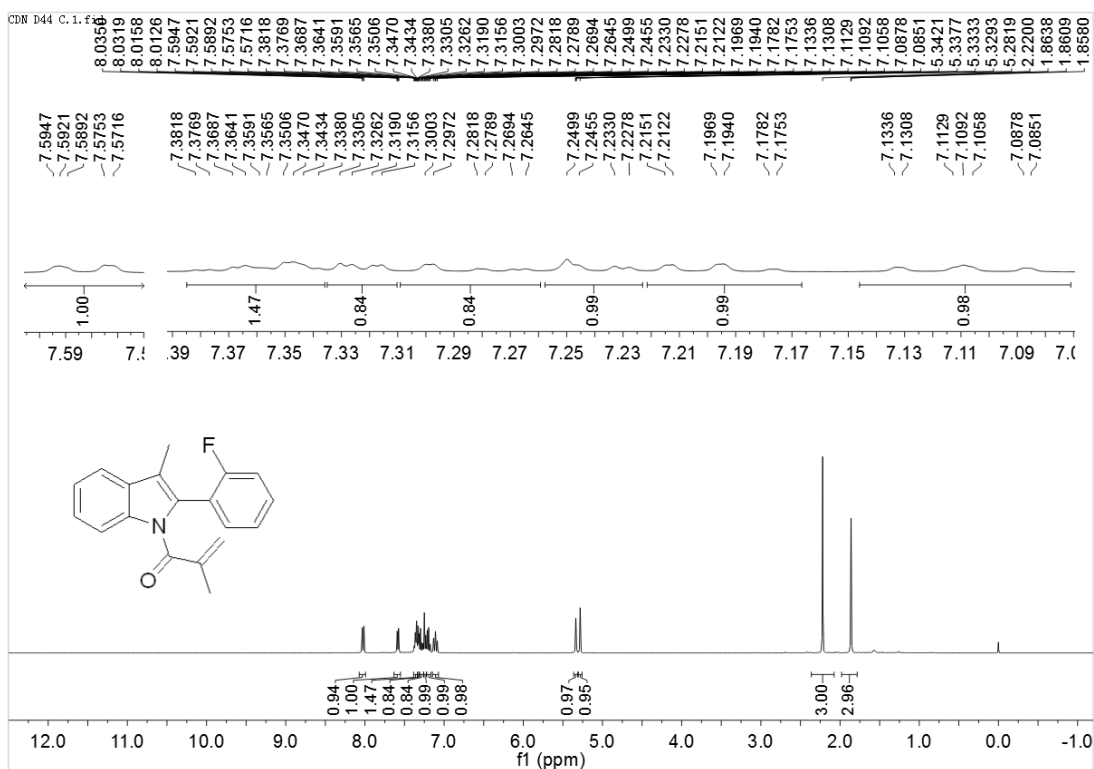

# <sup>13</sup>C NMR

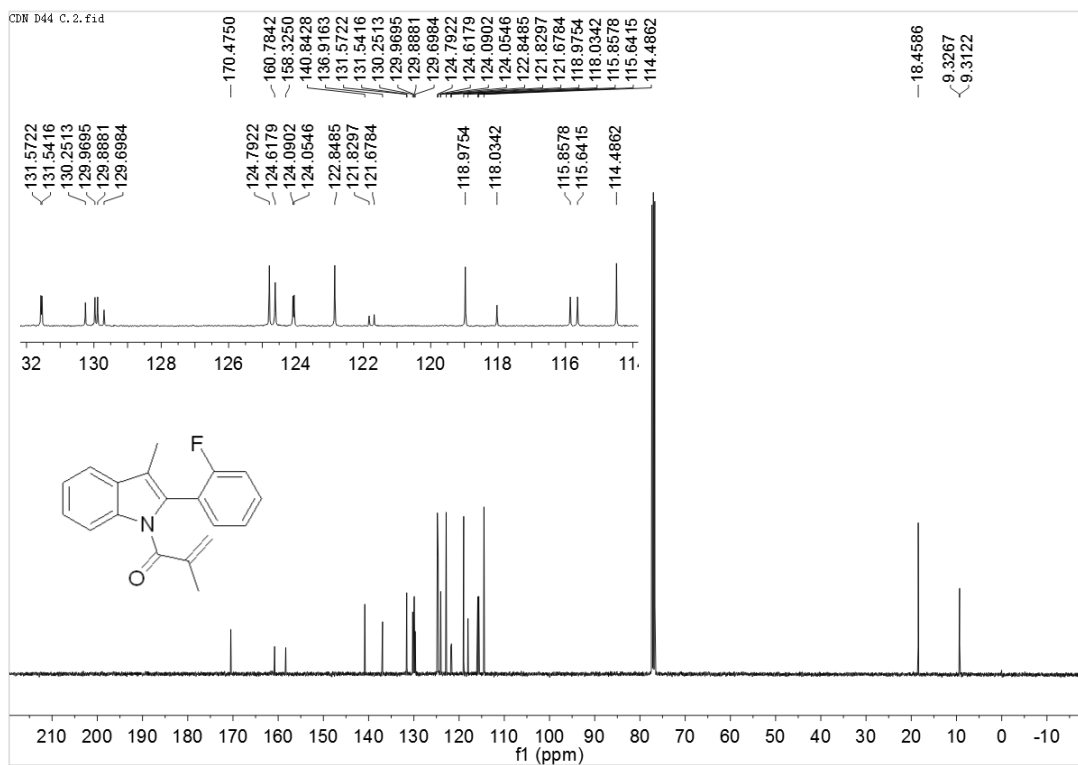

### DEPT 90 and DEPT 135

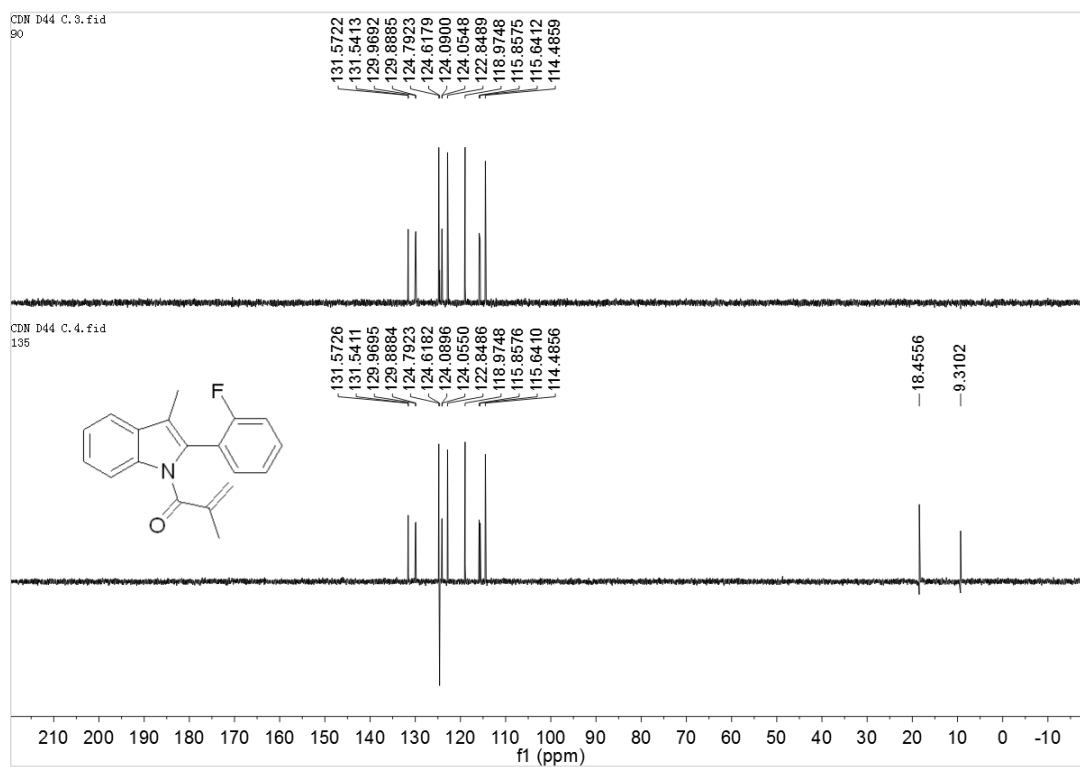

### <sup>19</sup>F NMR

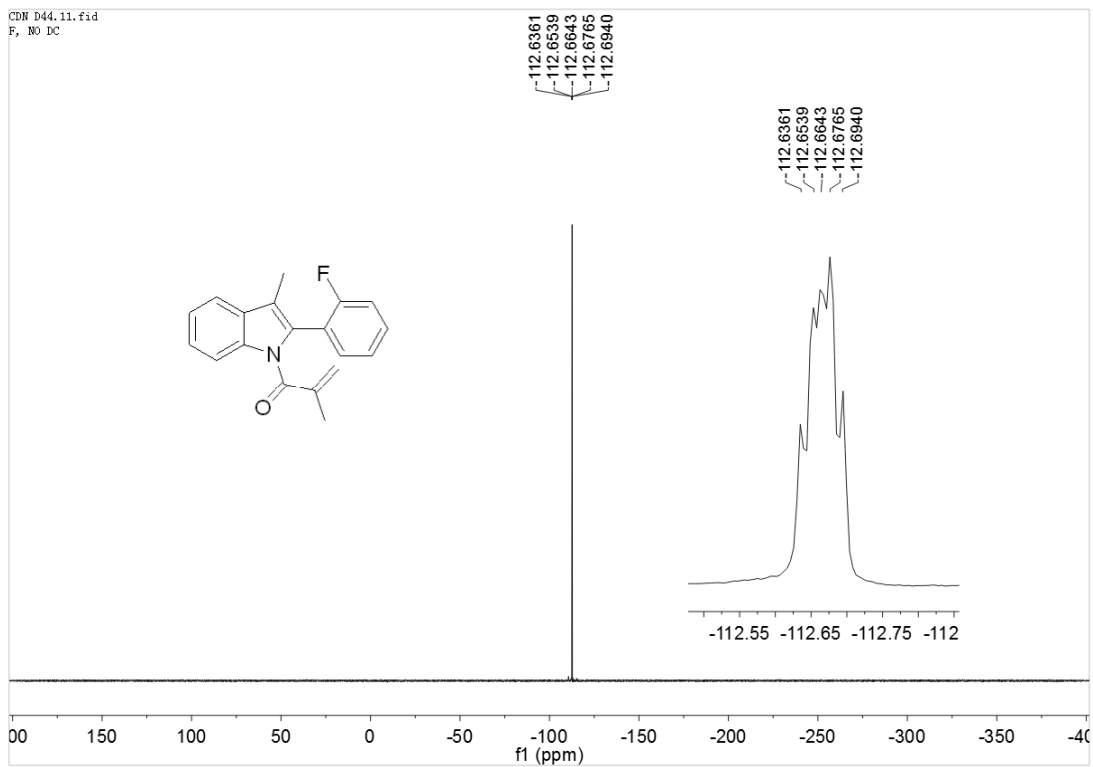

### 8b, <sup>1</sup>H NMR

CDN D39-7. 20. fid

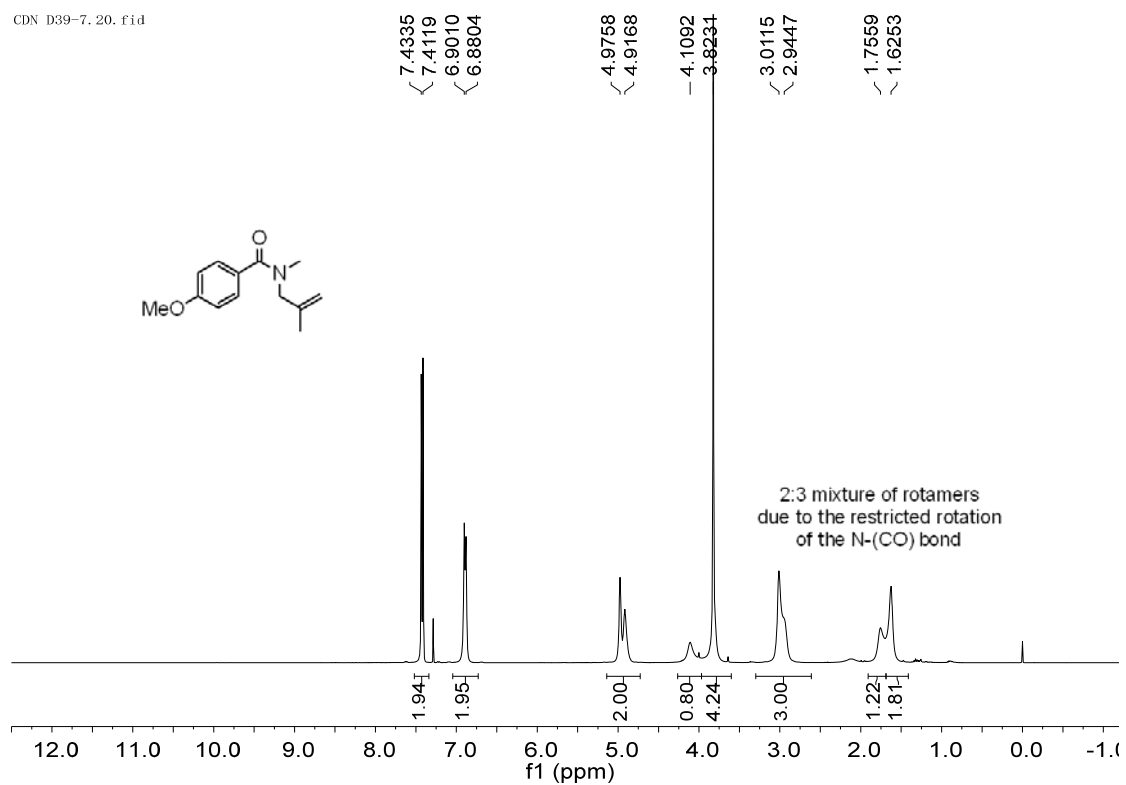

### <sup>13</sup>C NMR

CDN D39-7 C. 2. fid

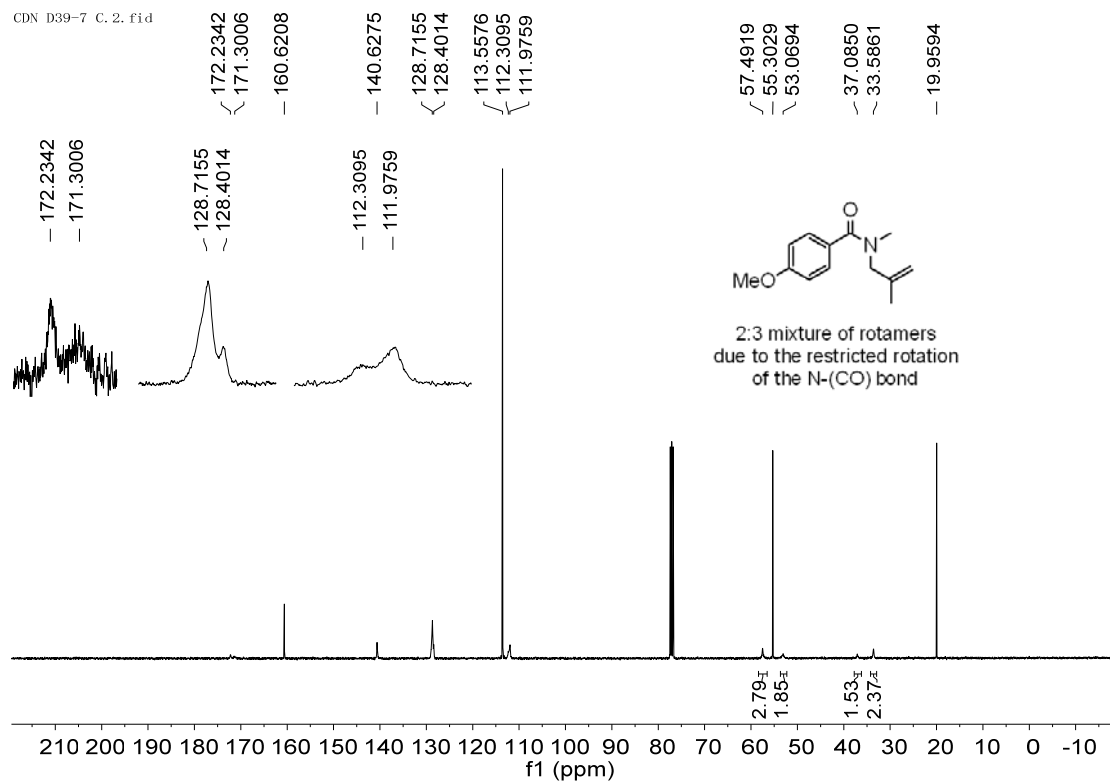

# DEPT 90 and DEPT 135

CDN D39-7 C. 3. fid

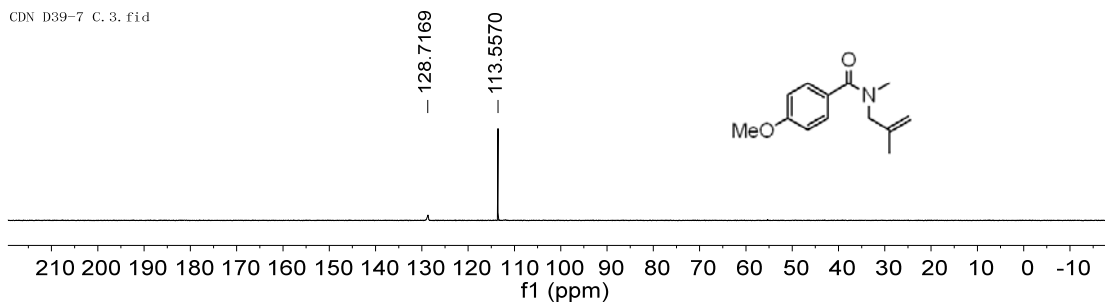

CDN D39-7 C. 4. fid  
135

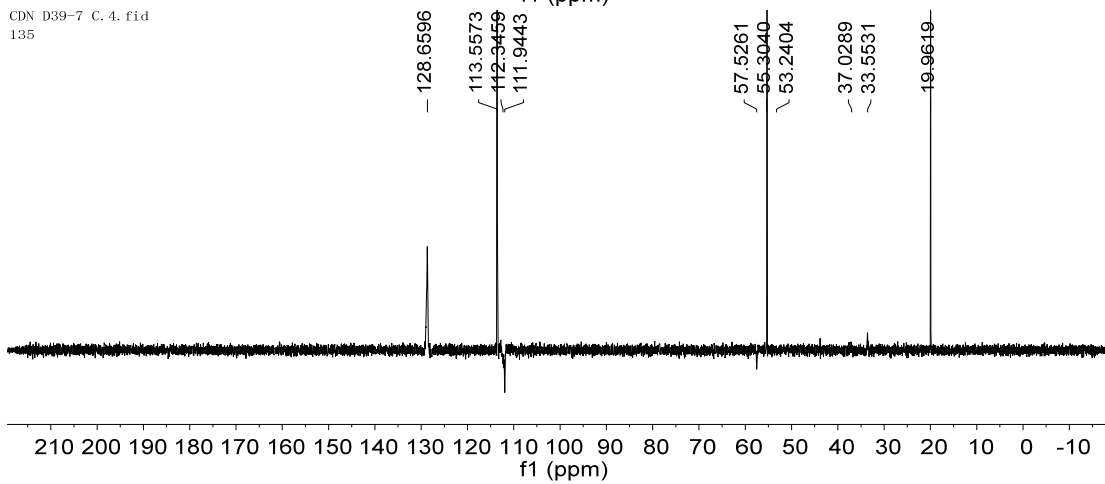

### 8c, <sup>1</sup>H NMR

CDN D42-8. 50. fid

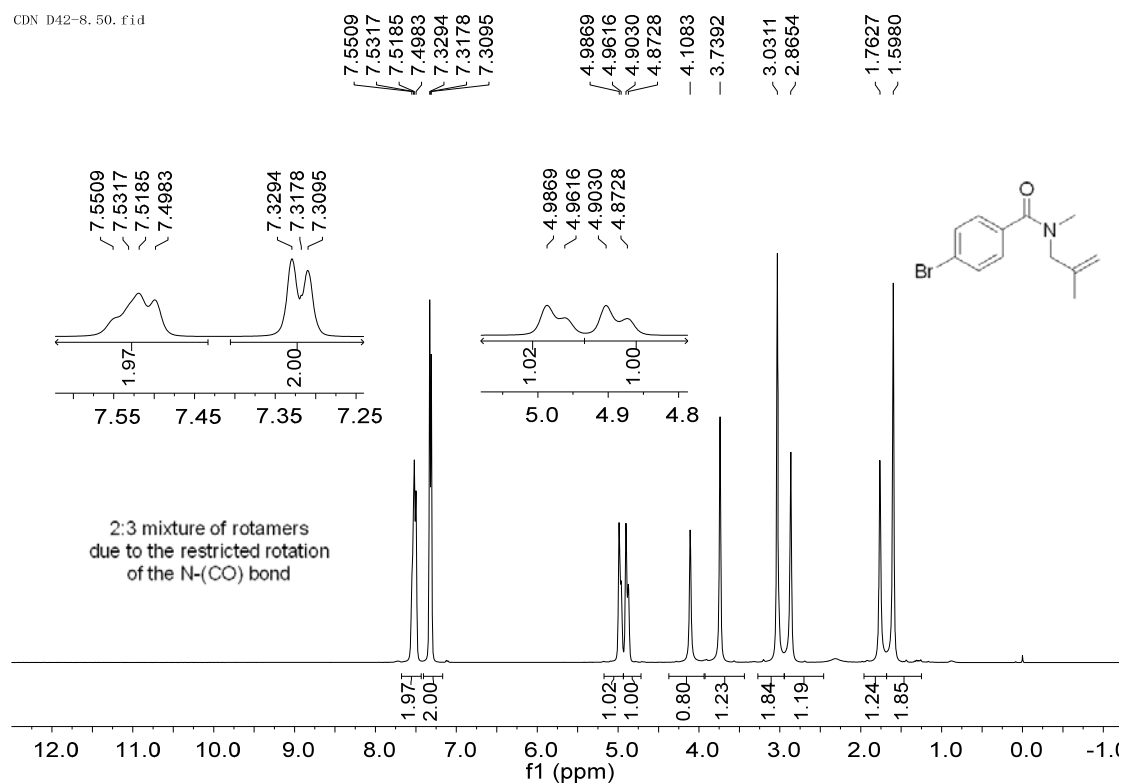

### <sup>13</sup>C NMR

CDN D42-8 C. 2. fid

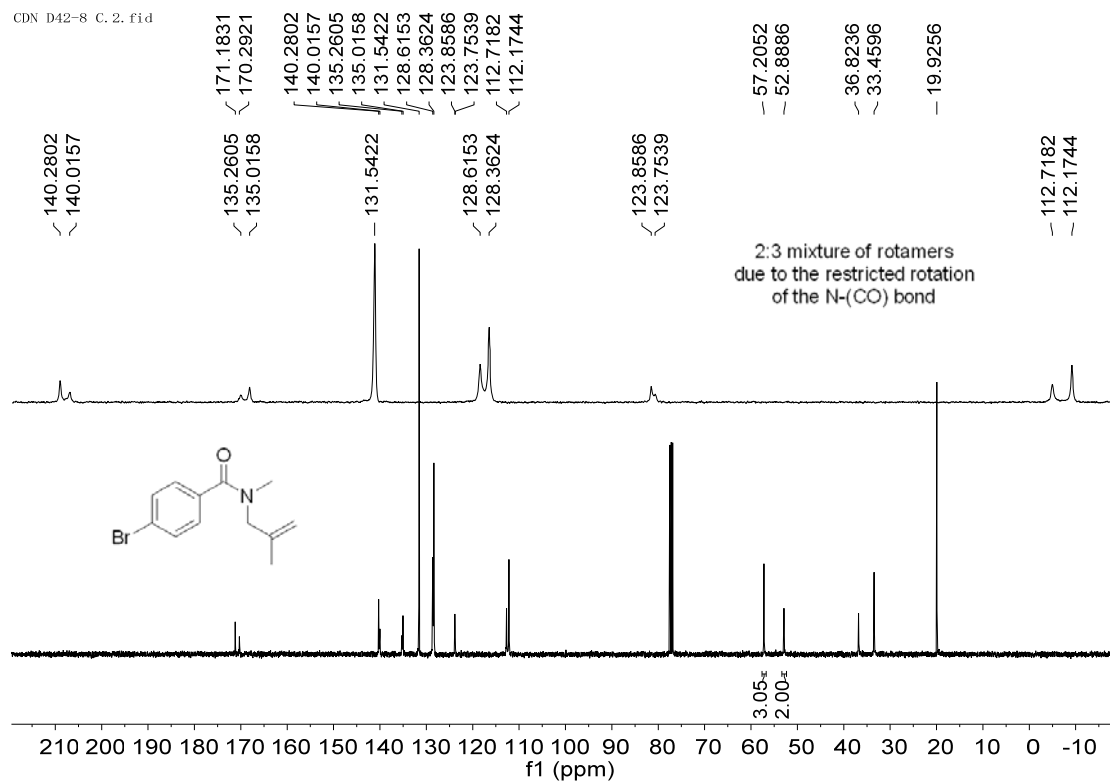

# DEPT 90 and DEPT 135

CDN D42-8 C. 3. fid  
90

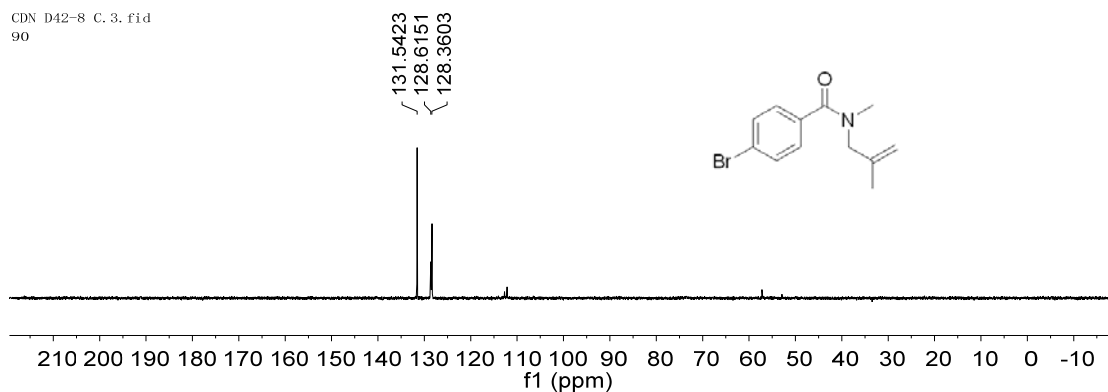

CDN D42-8 C. 4. fid  
135

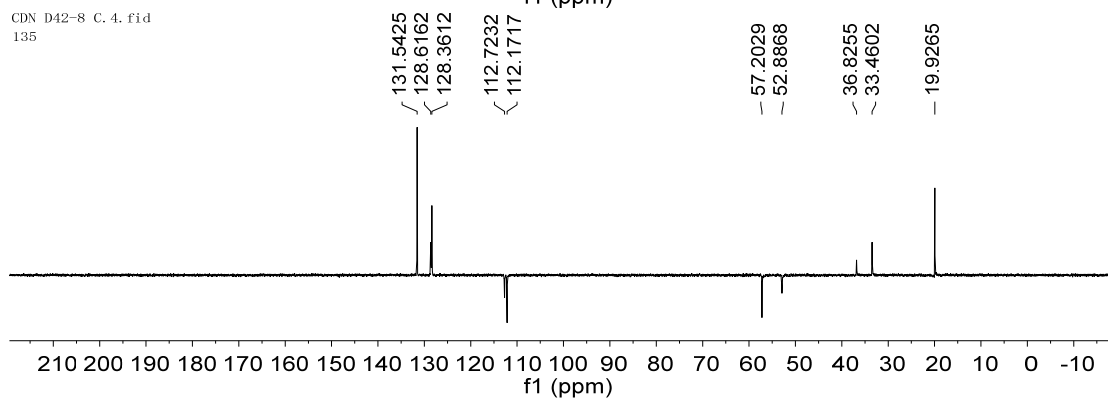

8d, <sup>1</sup>H NMR

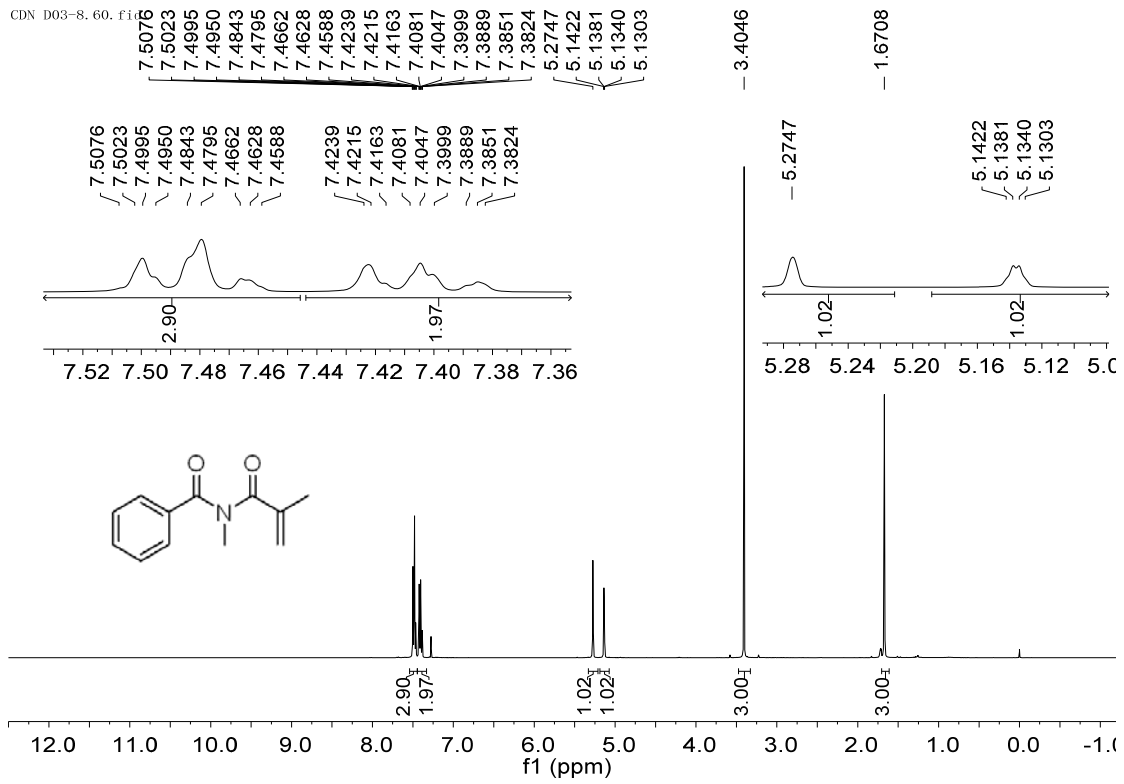

<sup>13</sup>C NMR

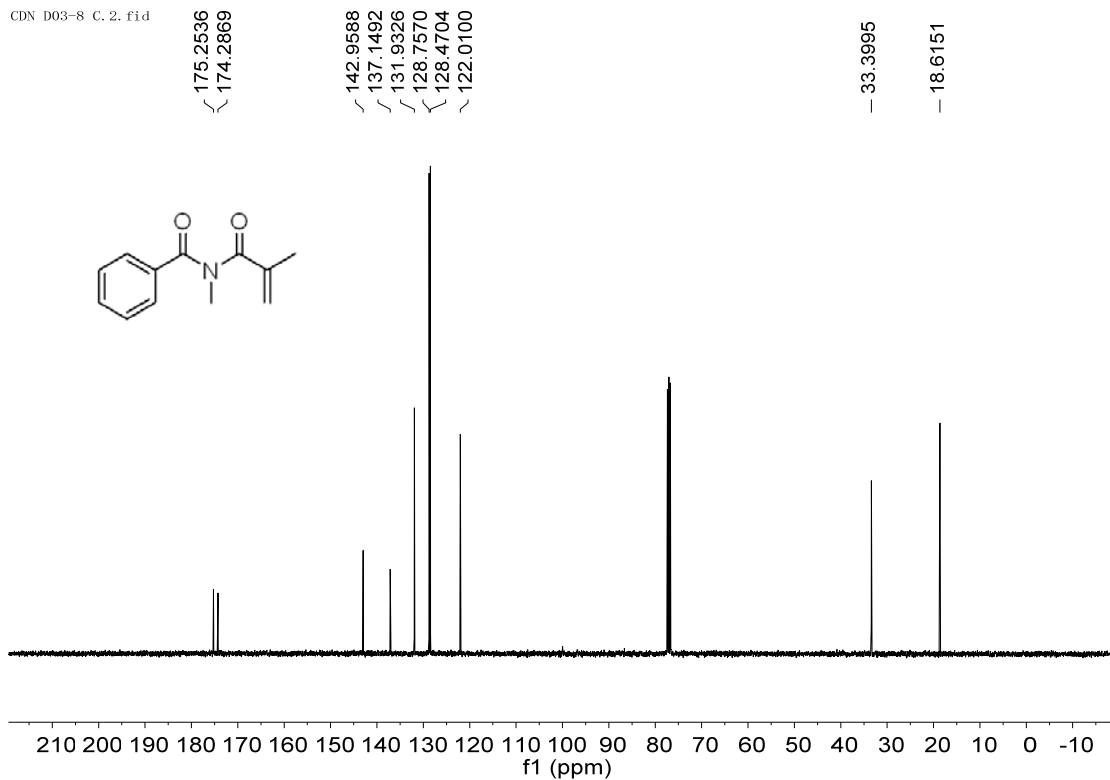



# DEPT 90 and DEPT 135

CDN D03-8 C. 3. fid  
90

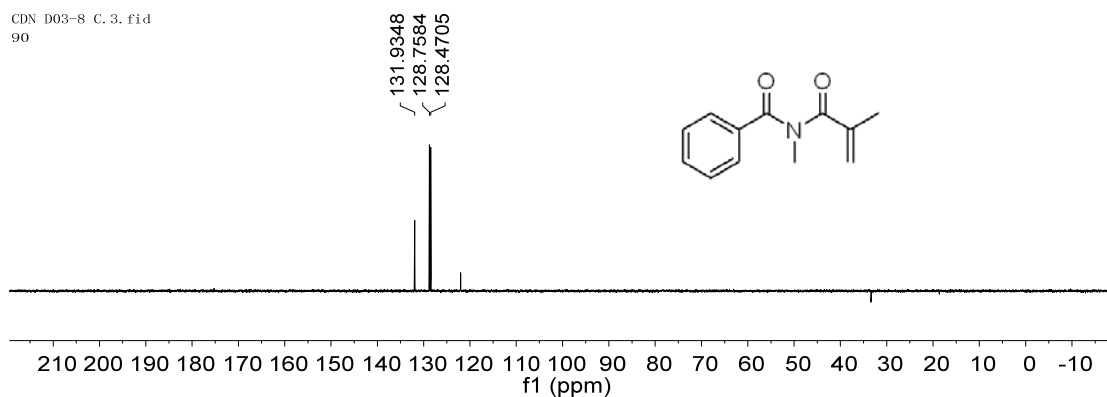

CDN D03-8 C. 4. fid  
135

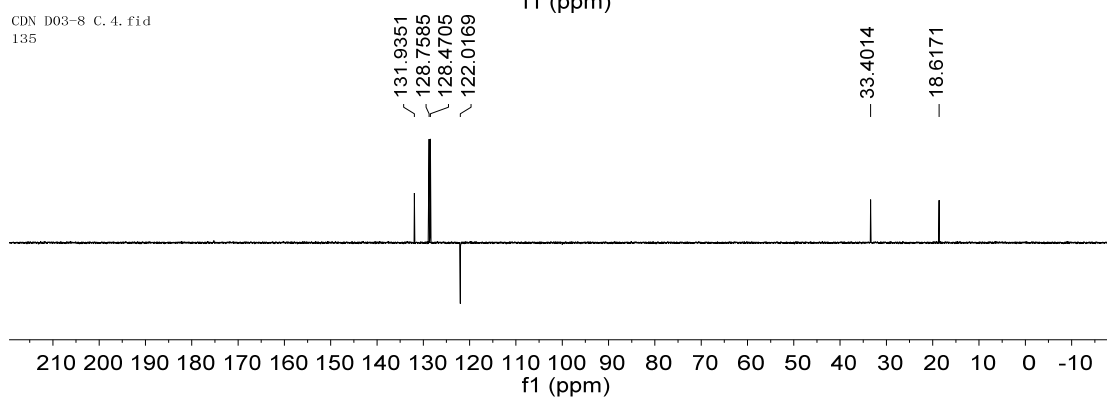

### 8f, <sup>1</sup>H NMR

CDN D43. 20. fid

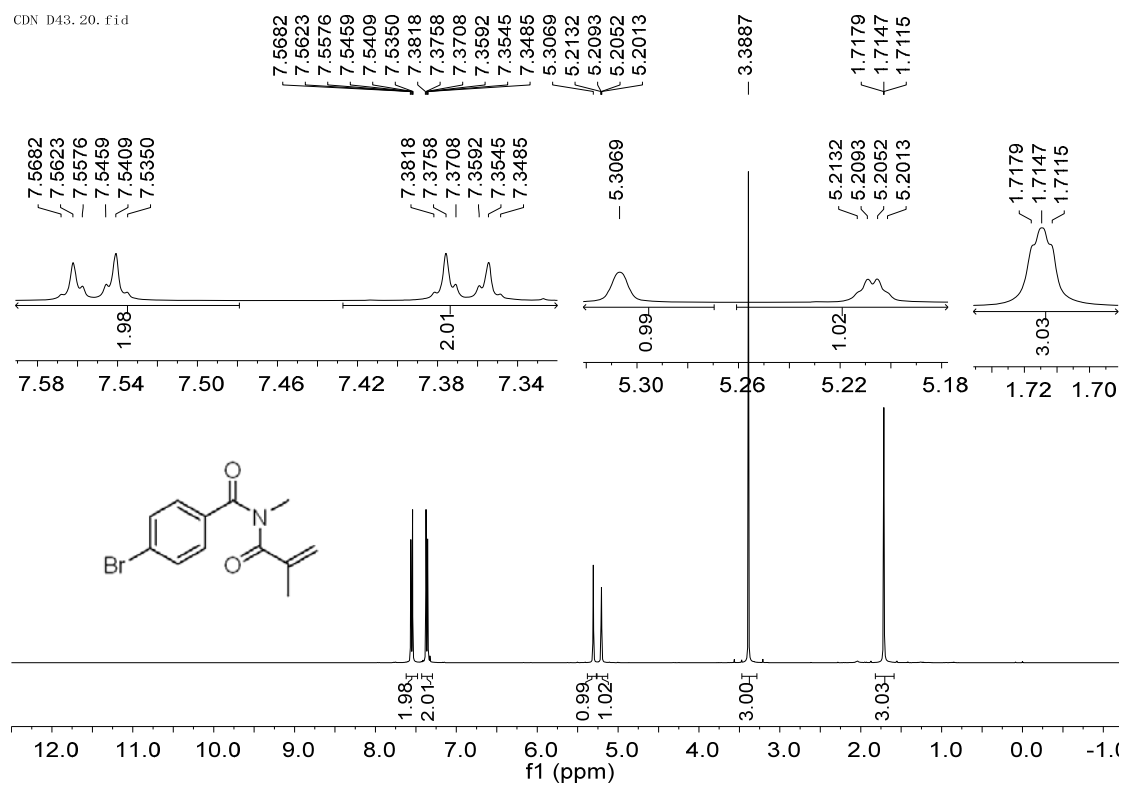

### <sup>13</sup>C NMR

CDN D43. 22. fid

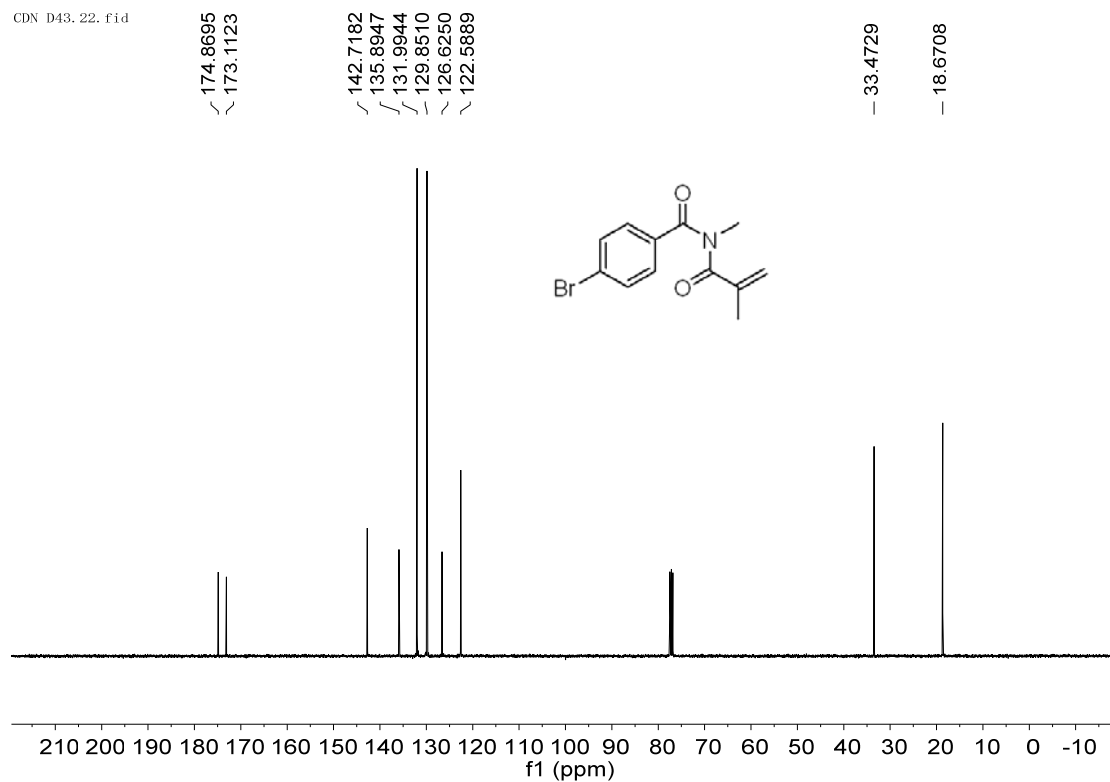

# DEPT 90 and DEPT 135

CDN D43. 23. fid  
90

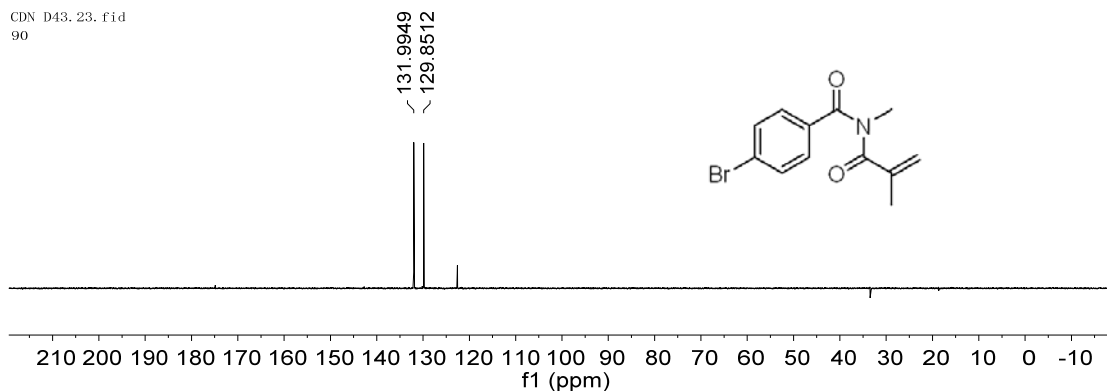

CDN D43. 24. fid  
135

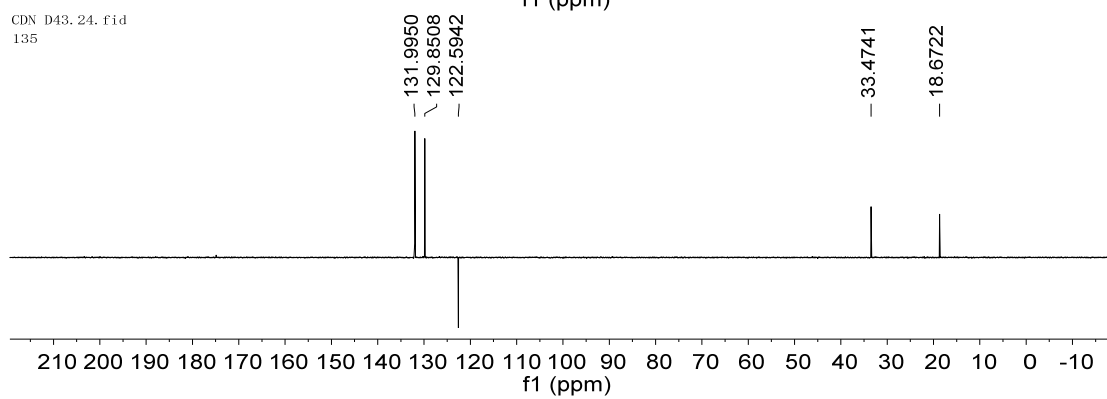



# DEPT 90 and DEPT 135

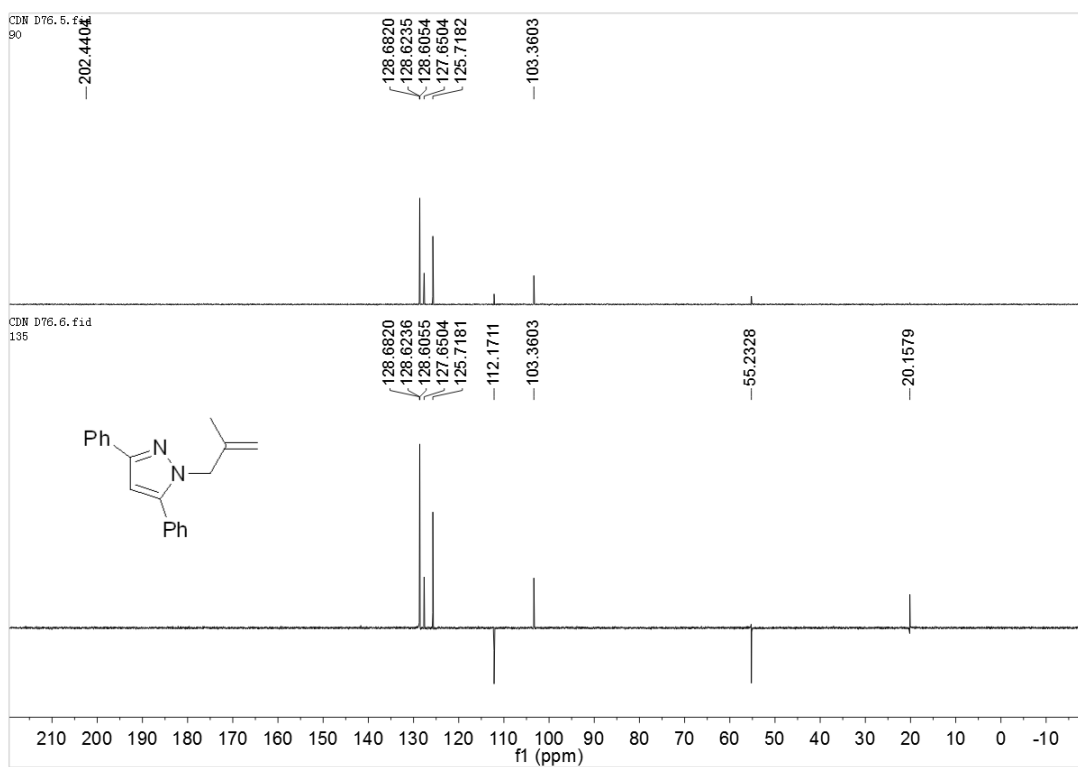

### 12b, <sup>1</sup>H NMR

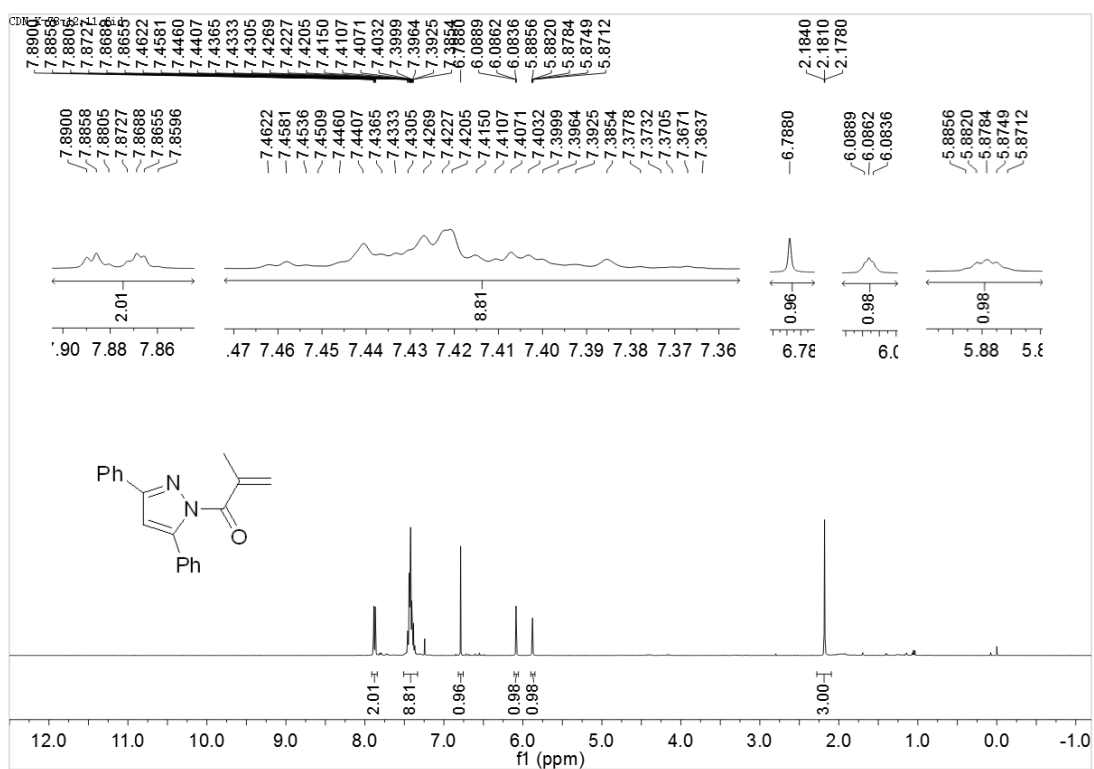

### <sup>13</sup>C NMR

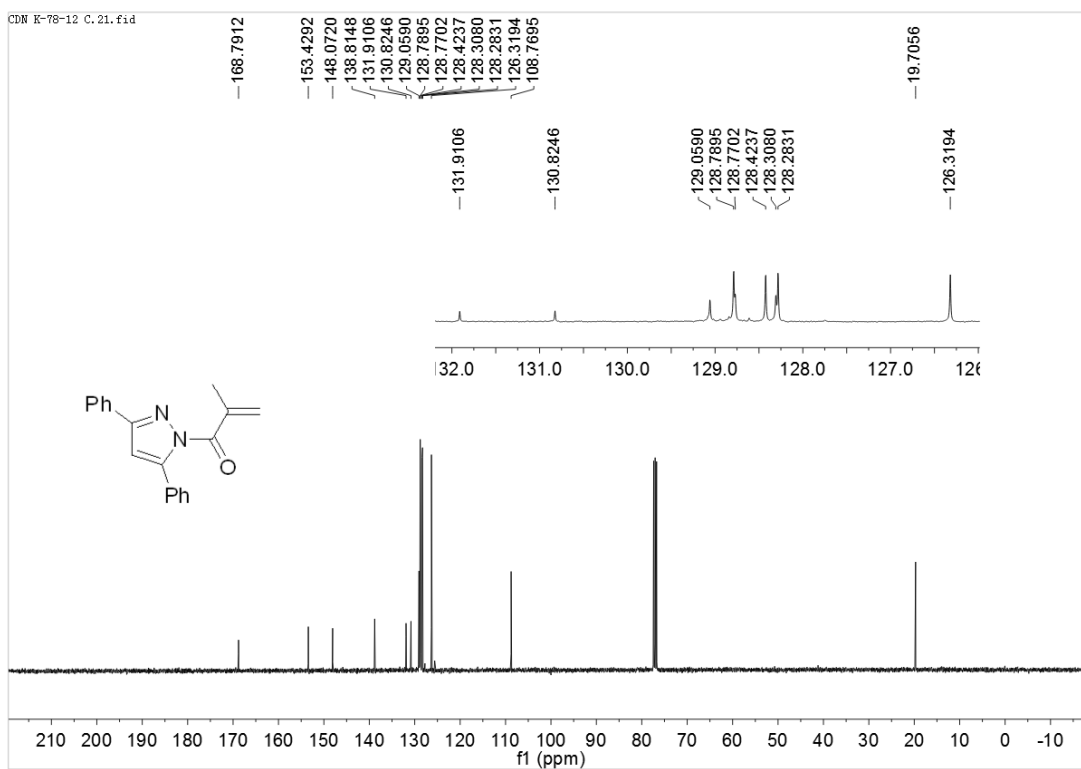

# DEPT 90 and DEPT 135

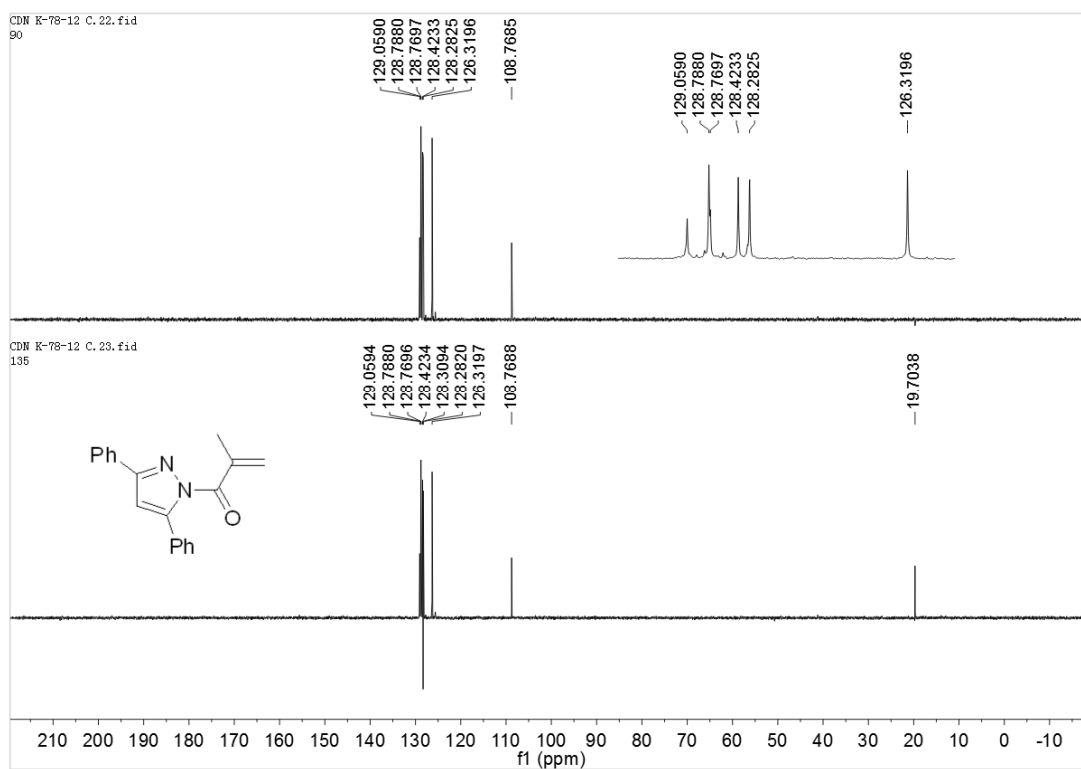

# 14, <sup>1</sup>H NMR

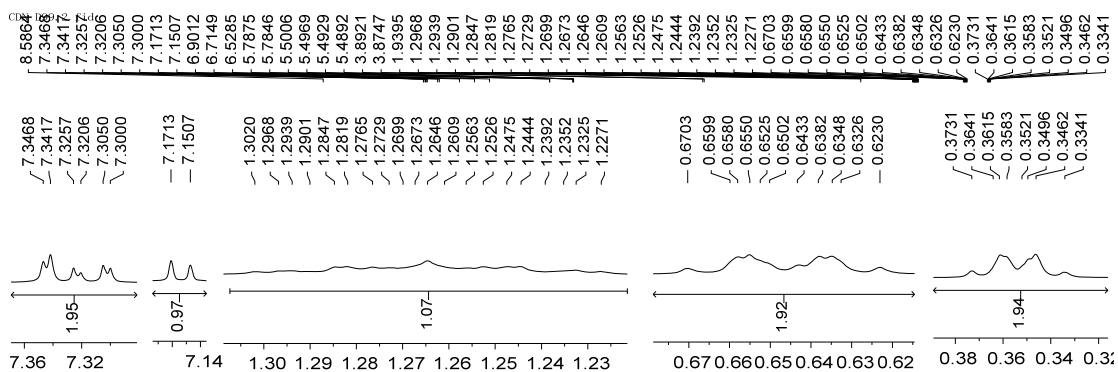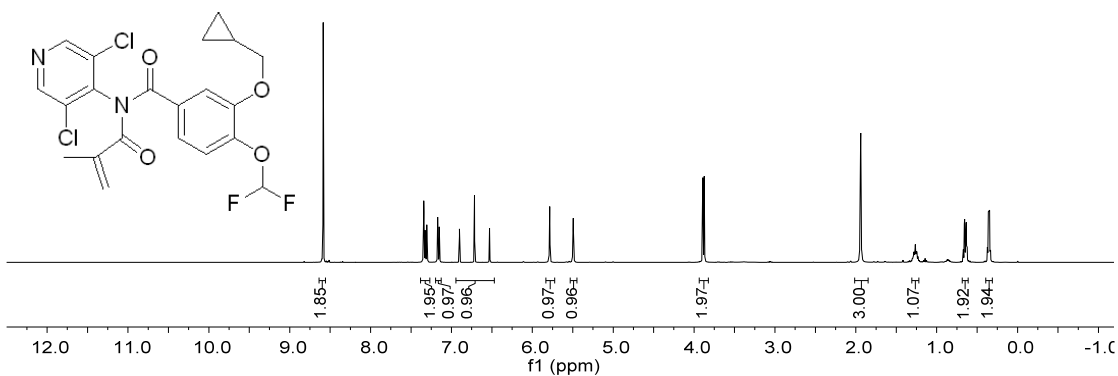

# 13C NMR

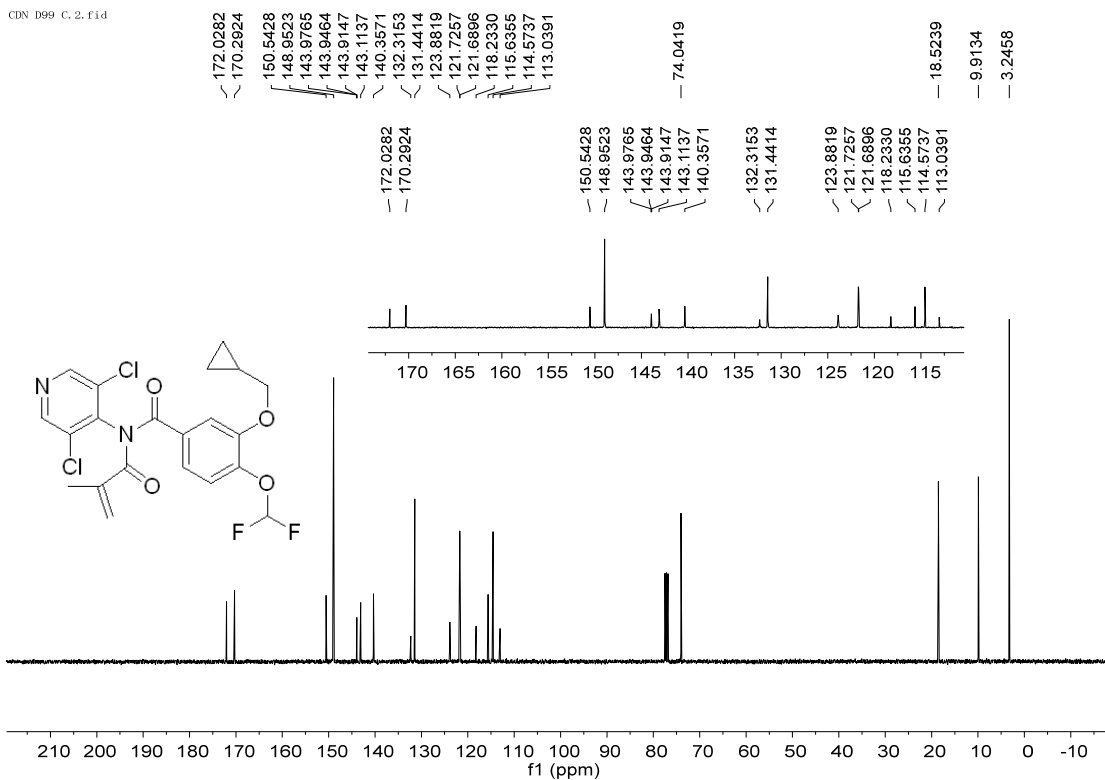



### DEPT 90 and DEPT 135

CDN D99 C. 3. fid  
90

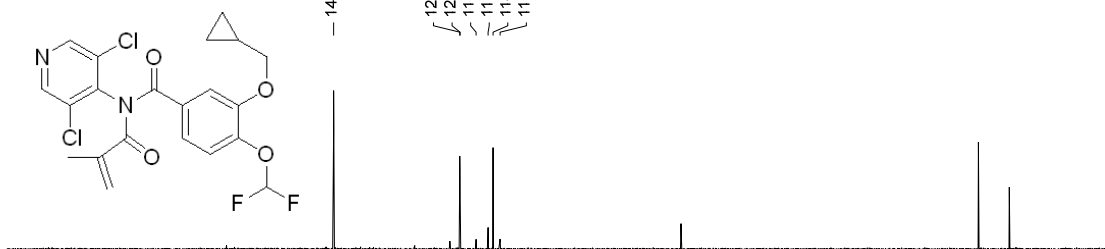

CDN D99 C. 4. fid  
135

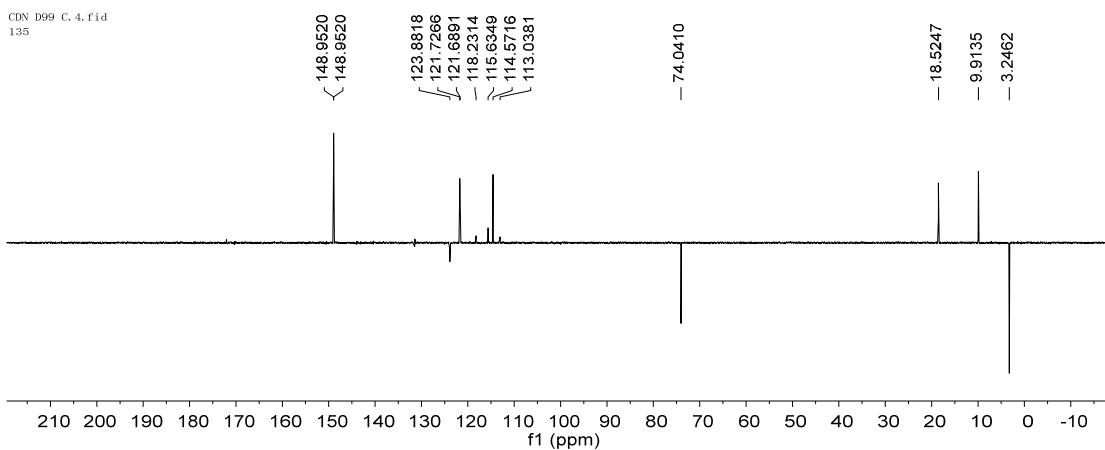

### <sup>19</sup>F NMR

CDN D99. 1. fid  
F, NO DC

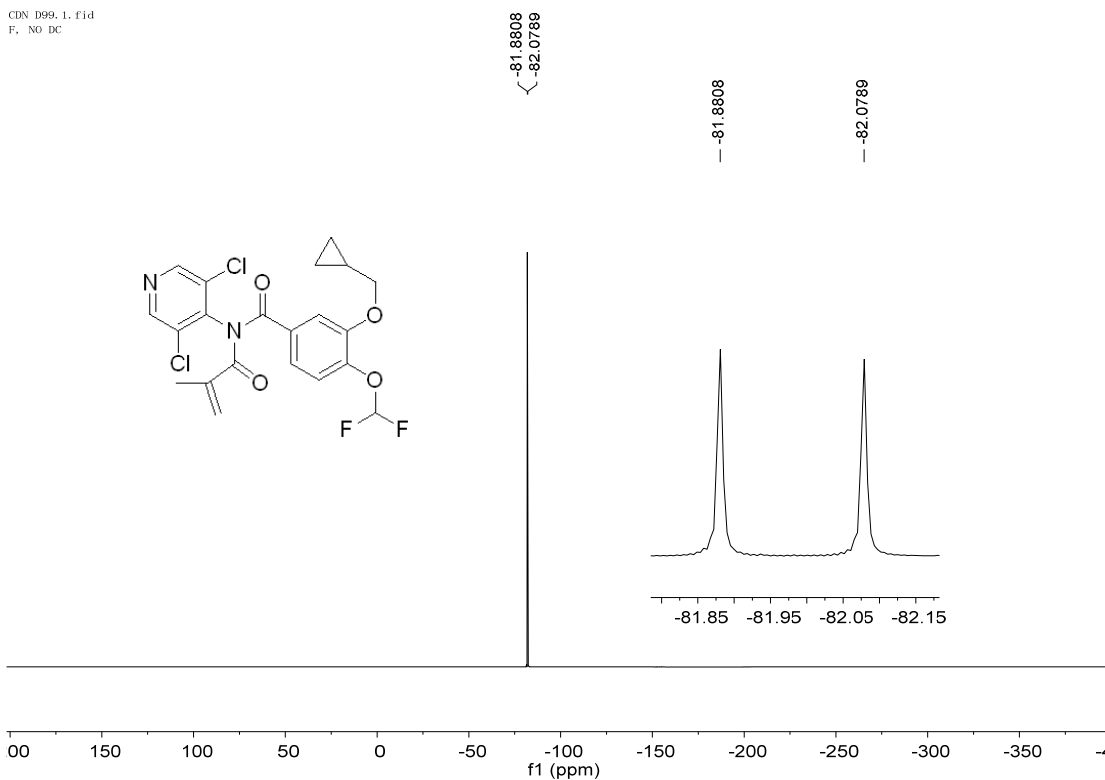

# 16, <sup>1</sup>H NMR

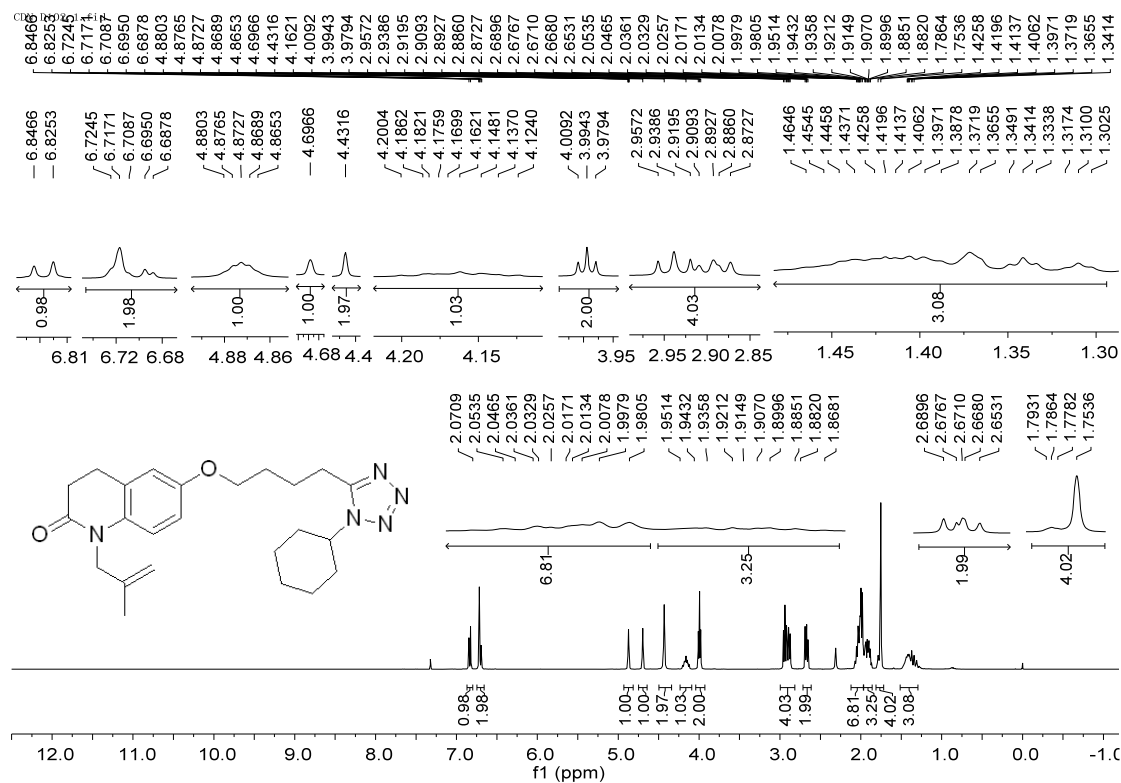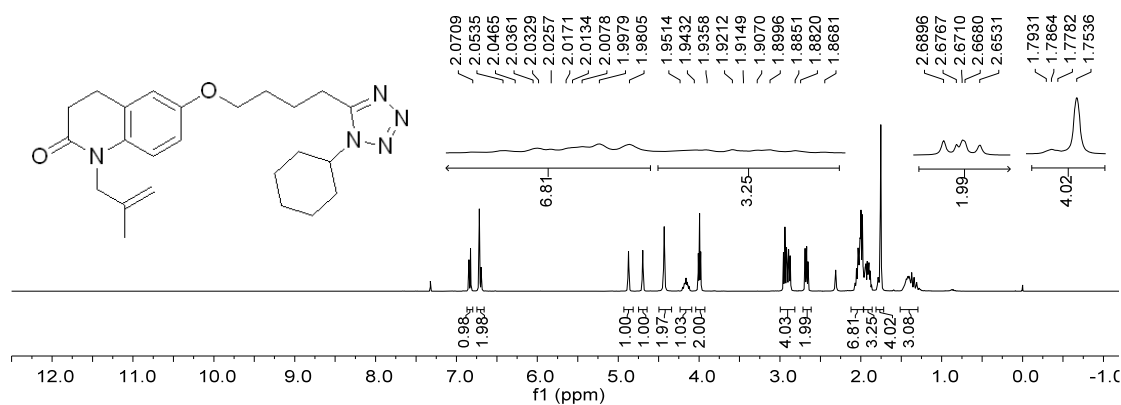

# <sup>13</sup>C NMR

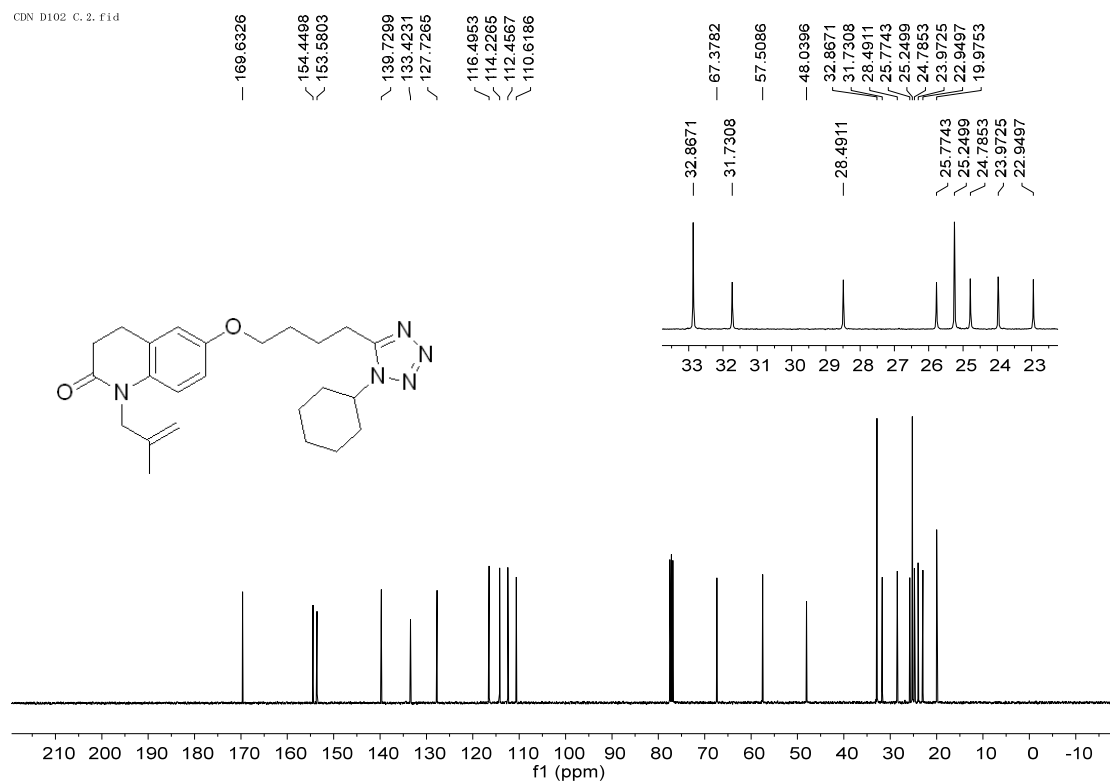

# DEPT 90 and DEPT 135

CDN D102 C. 3. F1d  
90

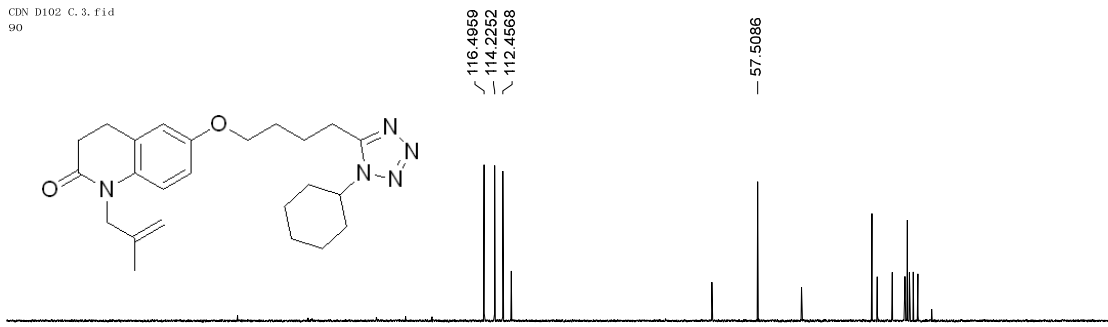

CDN D102 C. 4. F1d  
135

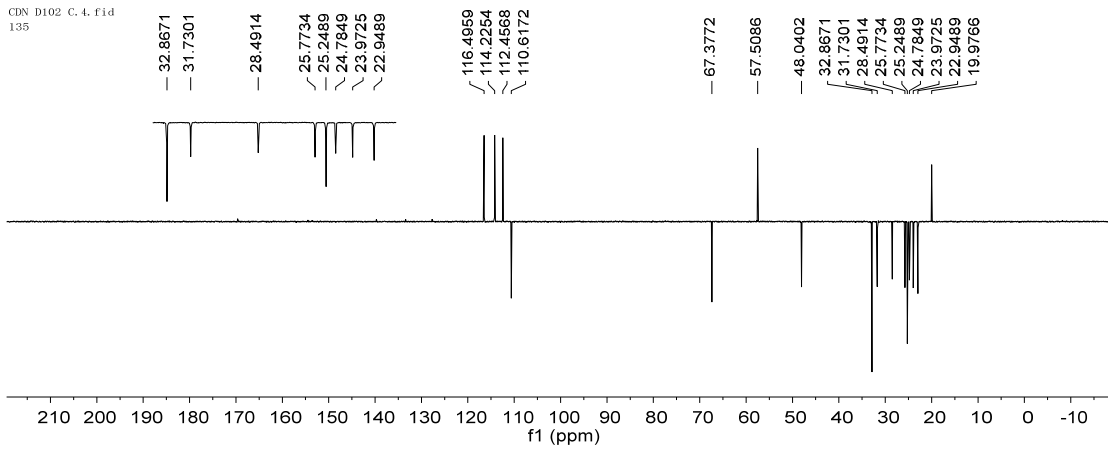

Supplement: d3qo00290j1.pdf [file d3qo00290j1.pdf]
